# Supplementary material
Source: publisher figshare collection journal article supplement (https://tandf.figshare.com/articles/dataset/_/9798299)

**FIGURE S1.** Boxplot presentation of some differentially accumulated metabolites involves in various metabolic pathways in date palm. The x-axis on the graphs represent the treatments while the y-axis represents the log10 value of the area under the MS peaks.

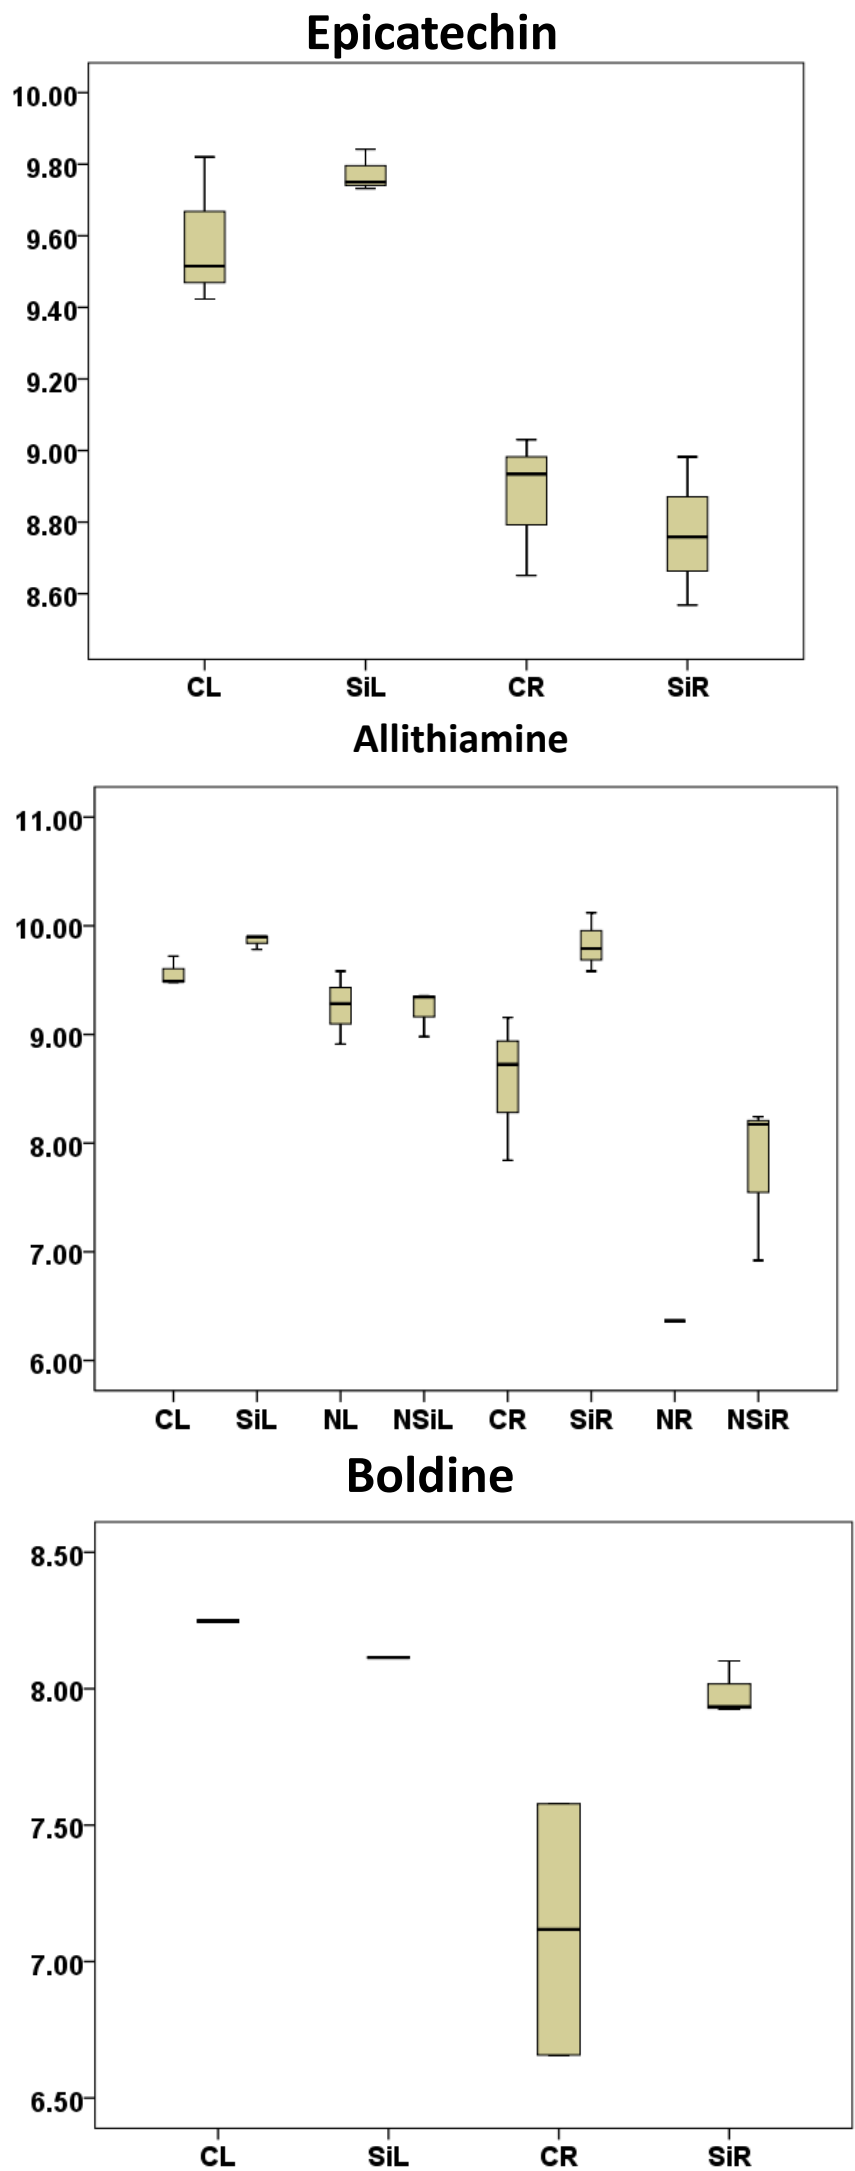

**Succinylacetone**

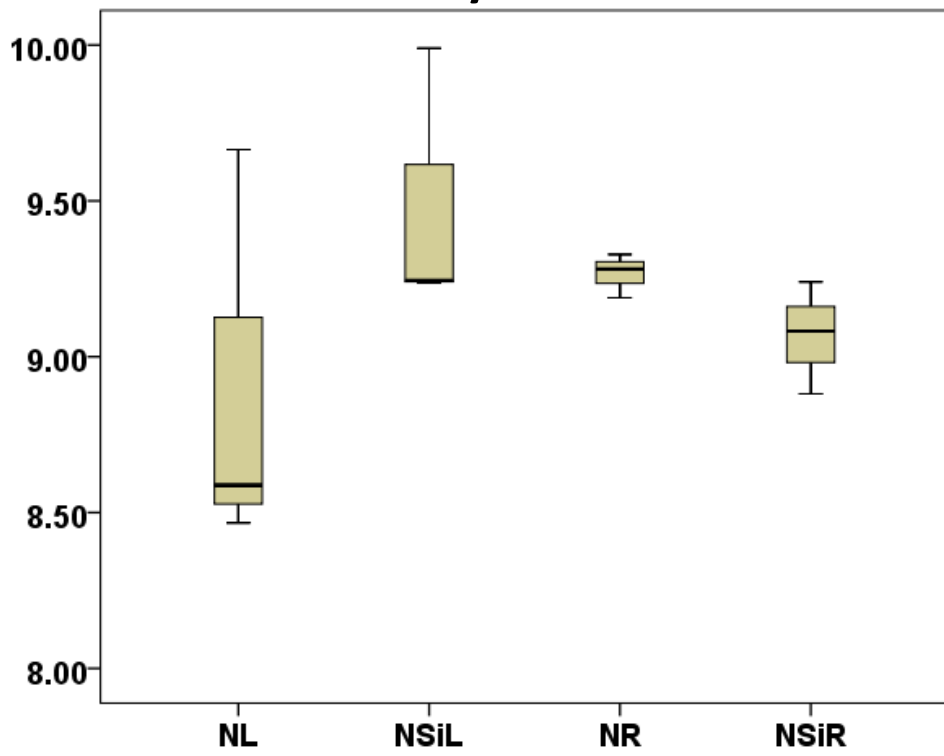

**L-Pinitol**

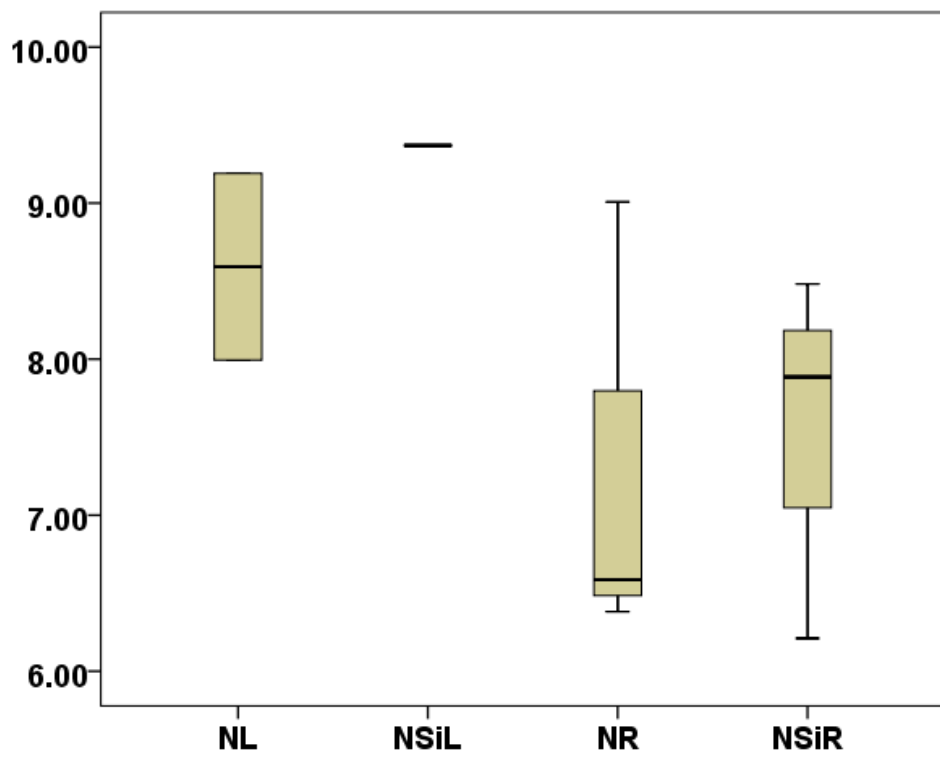

**Nicotiflorin**

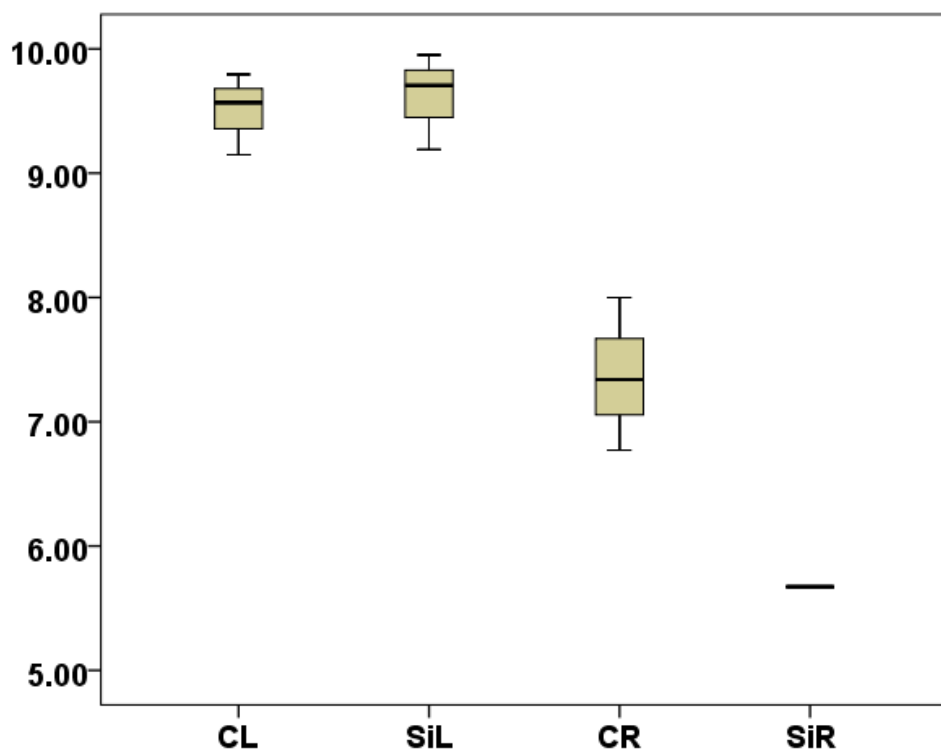

**(-)-Bornesitol**

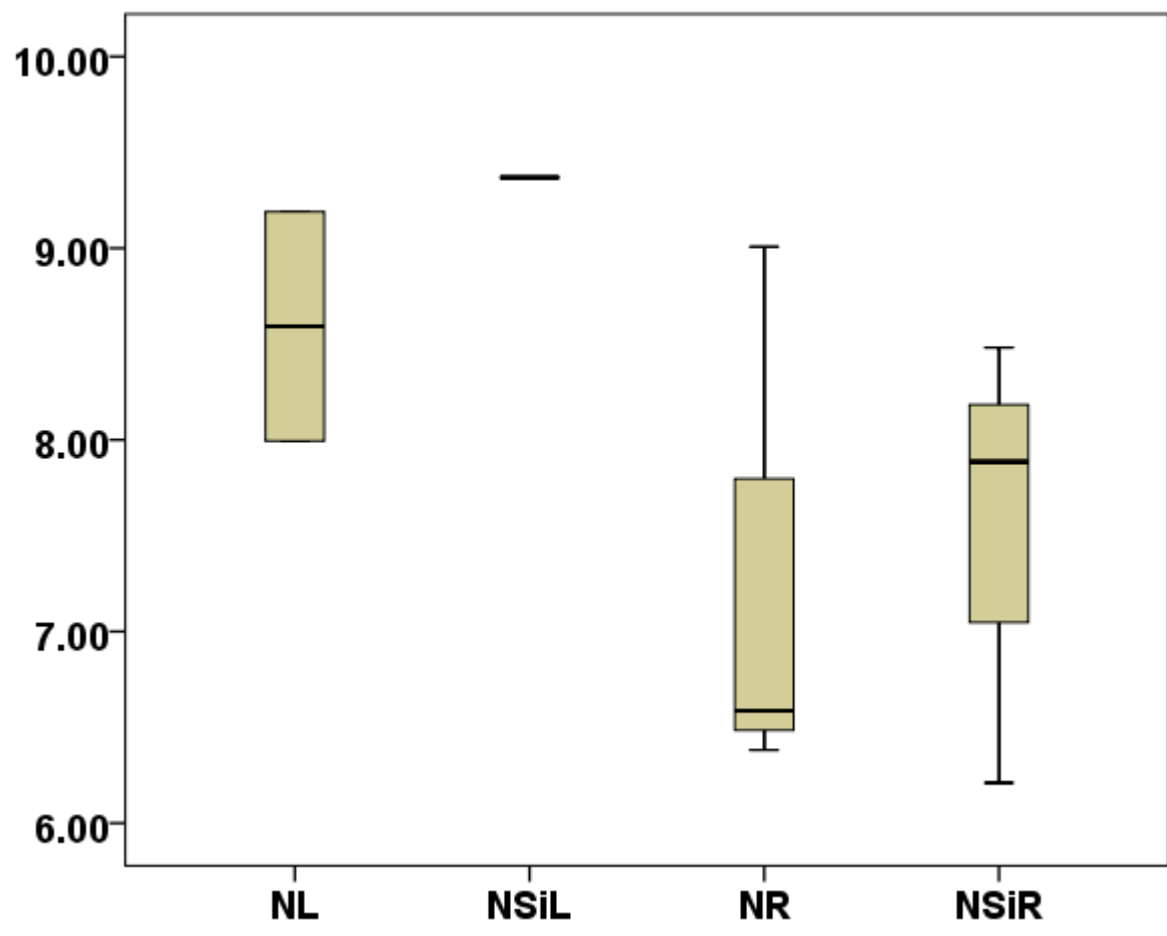

**Myristic acid**

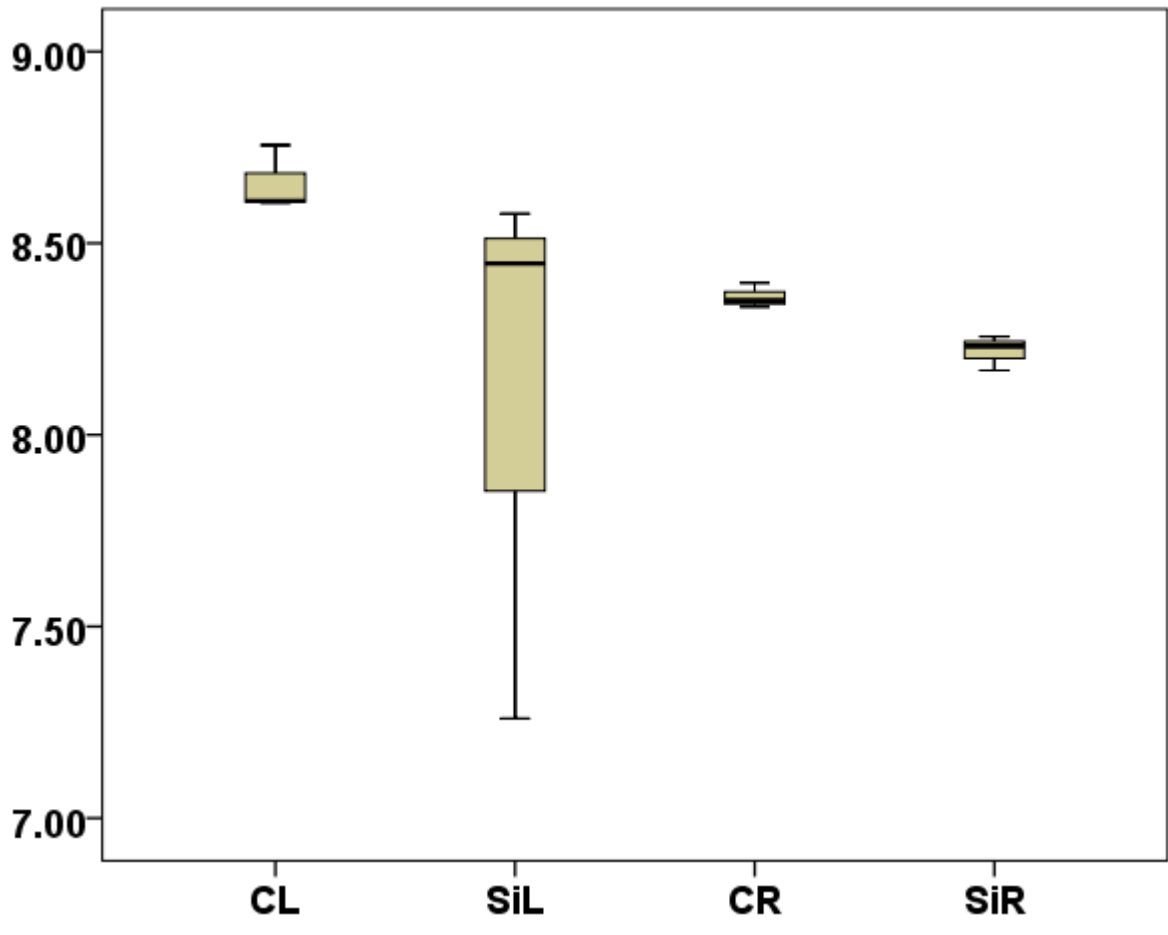

Paromomycin

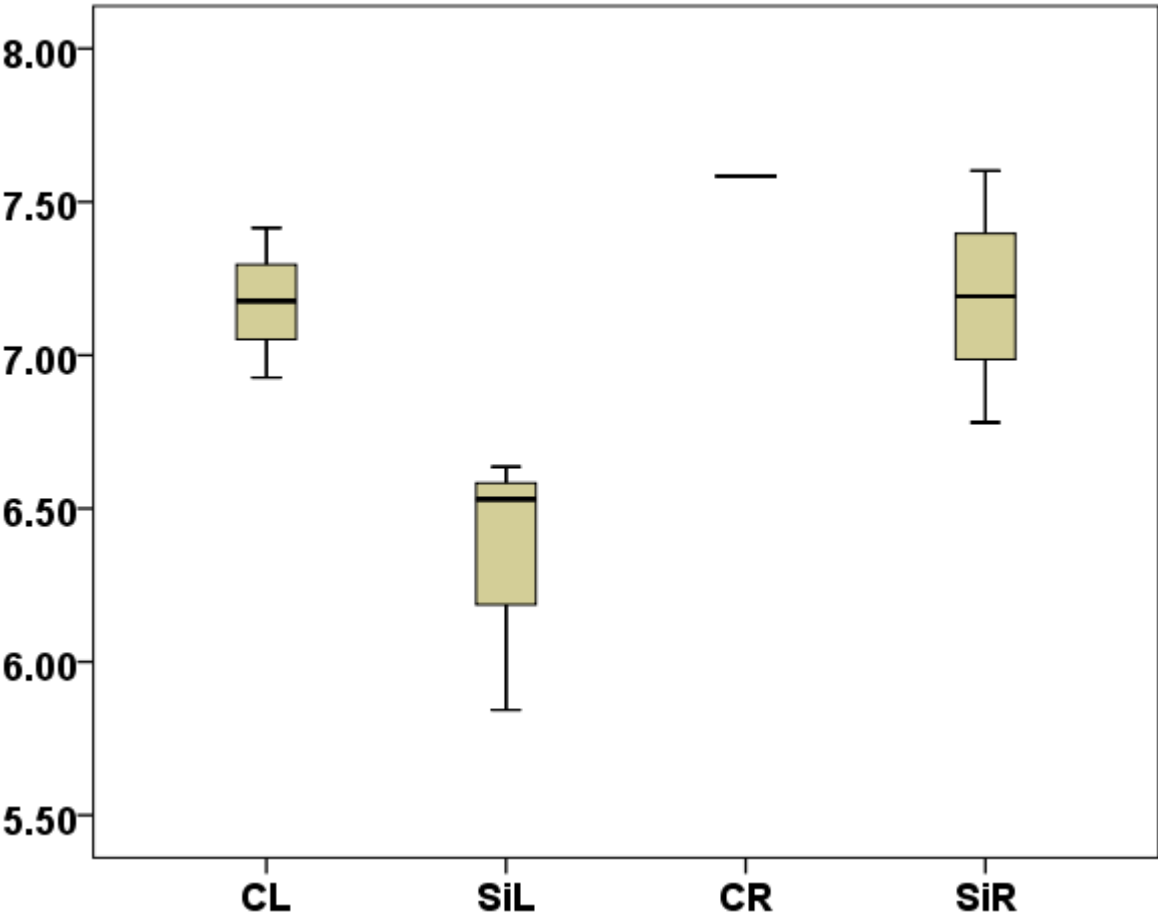

Glepidotin C

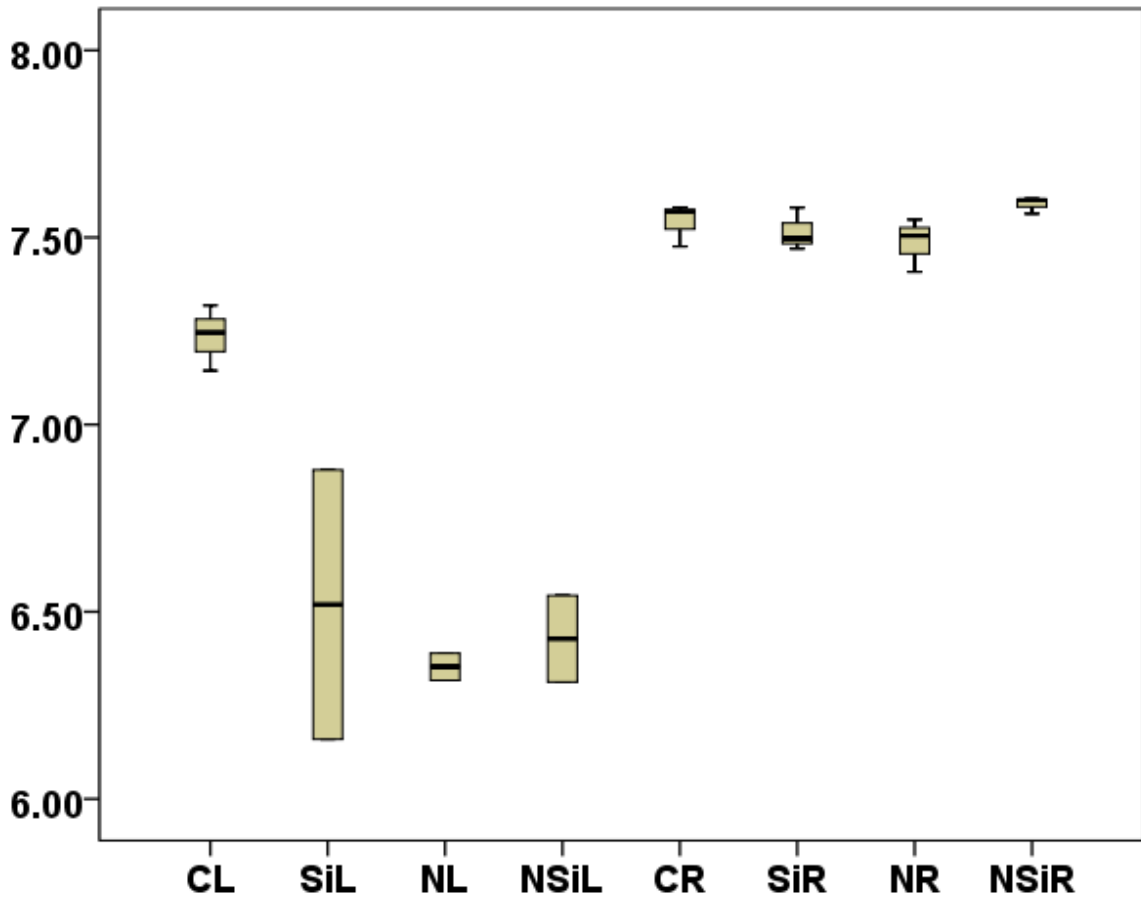

Supplement: Supplementary file 1 [file 1]
