# Supplementary material
Source: publisher figshare collection journal article supplement (https://tandf.figshare.com/articles/dataset/_/9798299)
Supplement: Supplementary file 2 [file 1]

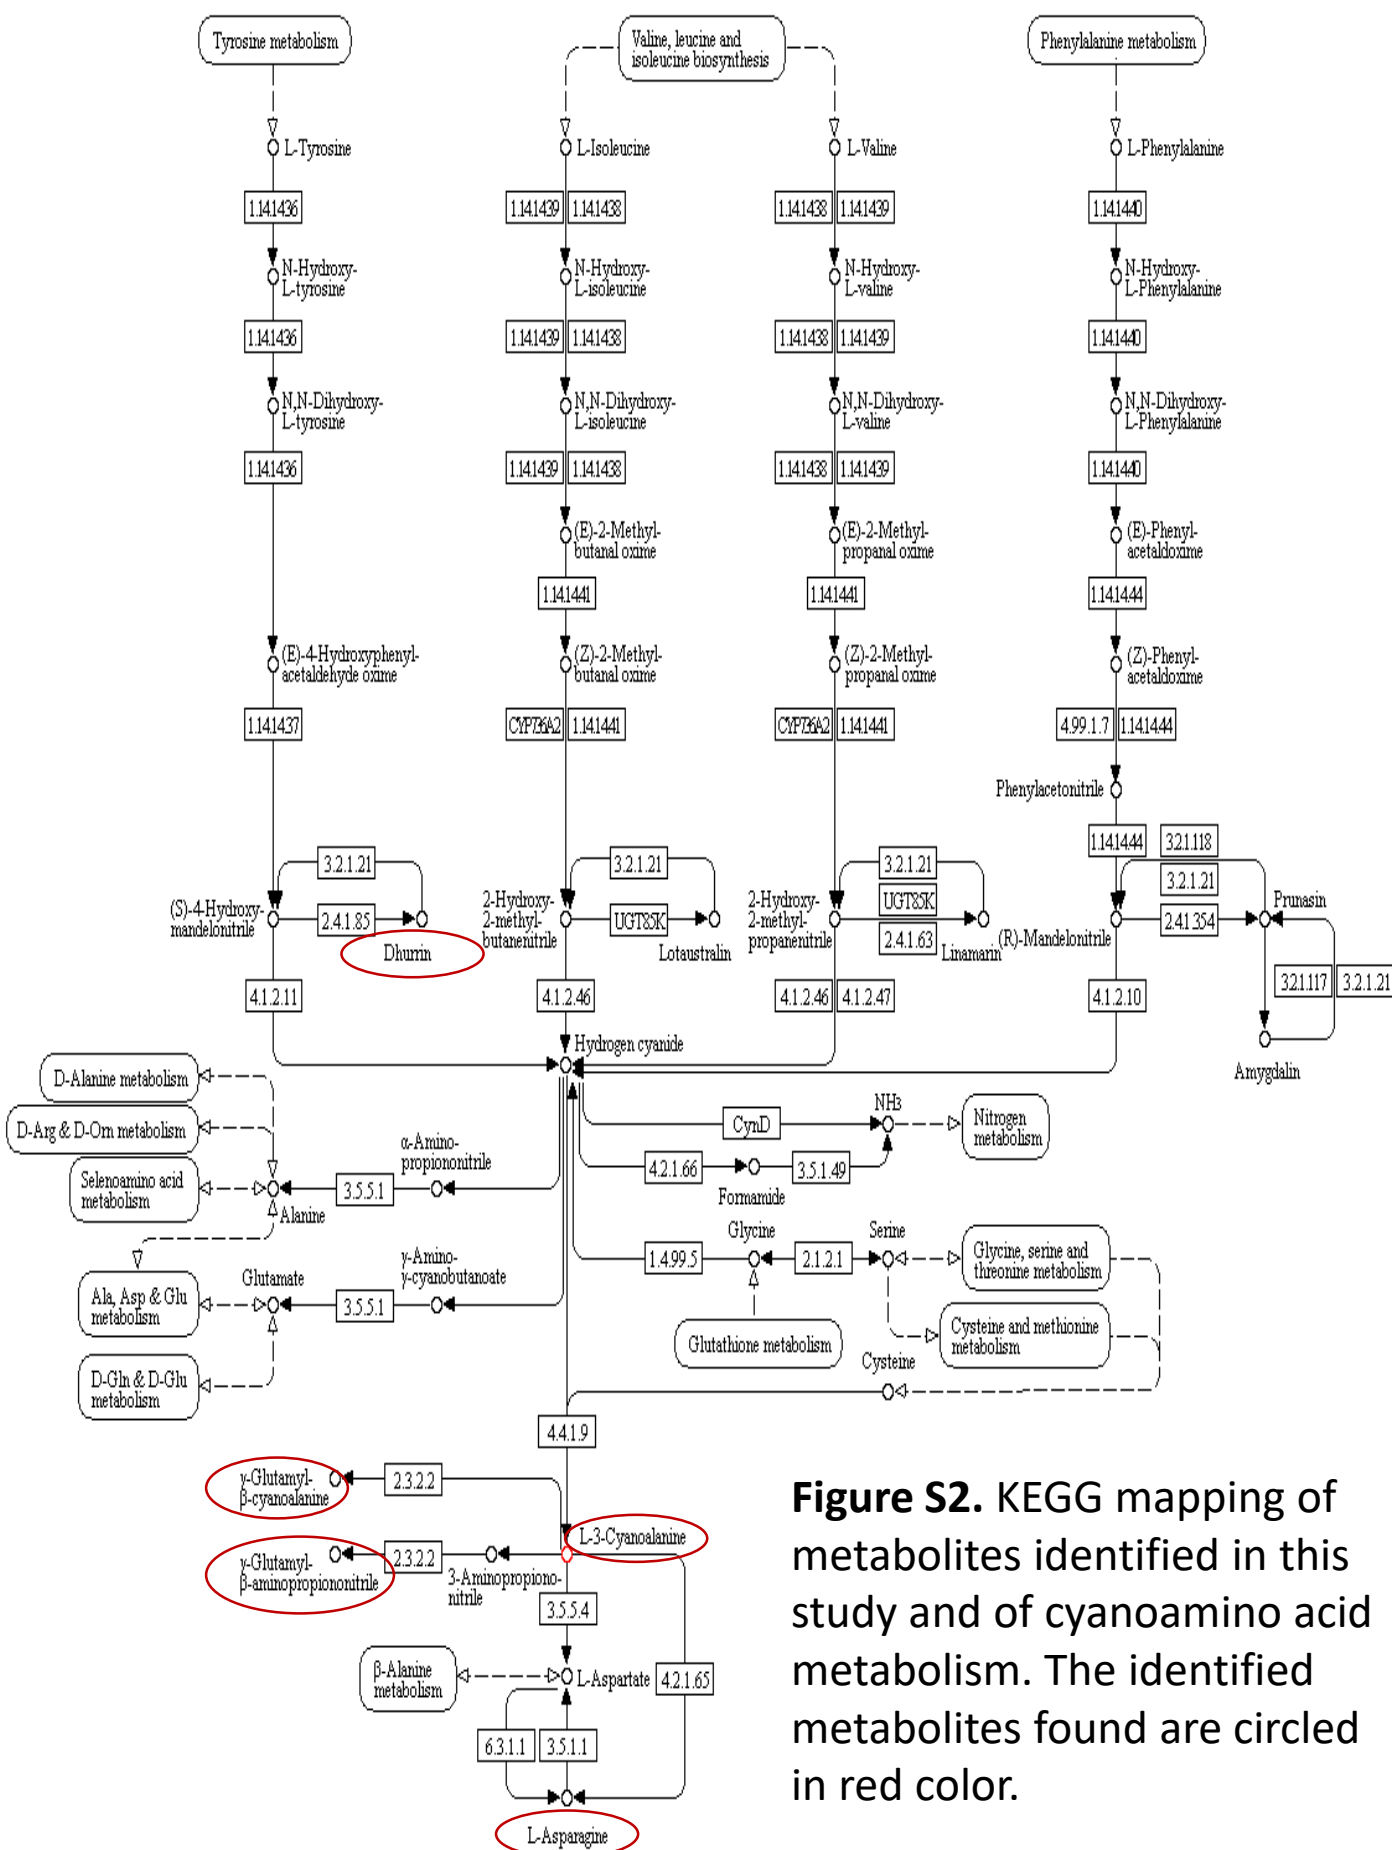

**Figure S2.** KEGG mapping of metabolites identified in this study and of cyanoamino acid metabolism. The identified metabolites found are circled in red color.
