# Supplementary material
Source: publisher figshare collection journal article supplement (https://tandf.figshare.com/articles/dataset/_/9798299)
Supplement: Supplementary file 3 [file 1]

Archive with 14 entries (14 files):
- Figure S1 - Copy.pdf
- Figure S2.pdf
- Table S1 - Copy.xlsx
- Table S10 - Copy.xlsx
- Table S11 - Copy.xlsx
- Table S12 - Copy.xlsx
- Table S2 - Copy.xlsx
- Table S3 - Copy.xlsx
- Table S4 - Copy.xlsx
- Table S5 - Copy.xlsx
- Table S6 - Copy.xlsx
- Table S7 - Copy.xlsx
- Table S8 - Copy.xlsx
- Table S9 - Copy.xlsx
