# Supplementary material
Source: publisher figshare collection journal article supplement (https://tandf.figshare.com/articles/dataset/_/9798299)
Supplement: Supplementary file 3 [file 1 › Table S1 - Copy.xlsx]

## Sheet: Table S1-1Publish Report of 201
Table S1. System and library searching settings used in the HILIC and RPLC-LC-MS.
HILIC						RPLC
Parameters						Parameters
Software Specifications						Software Specifications
Elements Version	1.4.2					Elements Version	1.4.2
ProteoWizard Version(s)	pwiz: 3.0.9987					ProteoWizard Version(s)	pwiz: 3.0.9987
Generate Filtered mz5 Files	FALSE					Generate Filtered mz5 Files	FALSE
Workflow						Workflow
Experiment Settings						Experiment Settings
Chromatographic System	HILIC					Chromatographic System	RPLC
Raw Files						Raw Files
Thermo RAW format	24 files					Thermo RAW format	24 files
Search						Search
Mass Range	[50.0..1200.0]					Mass Range	[50.0..1200.0]
Retention Time Range	Full Range					Retention Time Range	Full Range
Match Type	mass only					Match Type	mass only
Parent Tolerance	20.0 ppm					Parent Tolerance	20.0 ppm
Fragment Tolerance	0.5 Da					Fragment Tolerance	0.5 Da
RT Tolerance	30.0 sec					RT Tolerance	30.0 sec
Treat MS1 Peak Group as Single Analyte	FALSE					Treat MS1 Peak Group as Single Analyte	FALSE
Perform RT Alignment	TRUE					Perform RT Alignment	TRUE
Perform Feature Reextraction	TRUE					Perform Feature Reextraction	TRUE
Report Unknown Analytes	TRUE					Report Unknown Analytes	TRUE
All Analytes Have MS2 Data	FALSE					All Analytes Have MS2 Data	FALSE
Feature Finding						Feature Finding
Noise Threshold	0.1% of max signal					Noise Threshold	0.1% of max signal
Minimum Delta Scan Time	0.5 sec					Minimum Delta Scan Time	0.5 sec
Adducts						Adducts
[M+NH4]+	18.034					[M+NH4]+	18.034
[M+H]+	1.007					[M+H]+	1.007
[M-H]-	-1.007					[M-H]-	-1.007
In-source fragments						In-source fragments
Library						Library
Name	Combined_Library.libdb					Name	Combined_Library.libdb
Vendor						Vendor
Entries	736220					Entries	736220
File Location	C:\Users\massspec\Documents\Users Data\Elements Libraries\Combined_Library.libdb					File Location	C:\Users\massspec\Documents\Users Data\Elements Libraries\Combined_Library.libdb
Advanced Settings						Advanced Settings
ID Score Retention Threshold	0					ID Score Retention Threshold	0
ISF Intensity Threshold	0.2 (20% spectrum max intensity)					ISF Intensity Threshold	0.2 (20% spectrum max intensity)
RT Reproducibility Threshold	0.75 (75% reproducibility)					RT Reproducibility Threshold	0.75 (75% reproducibility)
RT Inclusion Threshold	1.0 sec					RT Inclusion Threshold	1.0 sec
RT Cross-charge Inclusion Threshold	1.0 sec					RT Cross-charge Inclusion Threshold	1.0 sec
Max Aligned RT Diff	30.0 sec					Max Aligned RT Diff	30.0 sec
Max Unaligned RT Diff	300.0 sec					Max Unaligned RT Diff	300.0 sec
Ignore Experimental MS2s	FALSE					Ignore Experimental MS2s	FALSE
Thresholds						Thresholds
ID Score	0.7					ID Score	0.7
Log10 Intensity	0					Log10 Intensity	0
Reproducibility	1					Reproducibility	1
Quantification and Statistics						Quantification and Statistics
Normalization Type	Sample Intensity Distributions					Normalization Type	Sample Intensity Distributions
END OF FILE						END OF FILE
RAW DATA PROCESSING: Raw data files were produced using the following chromatographic system: HILIC. Raw data and RPLC files were converted to mz5 format using ProteoWizard version(s) pwiz: 3.0.9987. Feature finding (a/k/a peak picking) was performed using Elements (version 1.4.2, Proteome Software Inc., Portland, OR). Feature finding was conducted over a mass range of [50.0‥1200.0] and the entir…
