# Supplementary material
Source: publisher figshare collection journal article supplement (https://tandf.figshare.com/articles/dataset/_/9798299)
Supplement: Supplementary file 3 [file 1 › Table S2 - Copy.xlsx]

## Sheet: Table S2
Table S2. Differentially accumulated metabolites which are common in all treatments with significant quantities (p, q ≤ 0.05) in control leaf (CL), control root (CR), salinity treated leaf (NL), salinity treated root (NR), salinity treatment with silicon leaf (NSiL), salinity treatment with silicon root (NSiR), silicon-treated leaf (SiL) and Silicon treated roots (SiR). Values are shown as the lo…
#	Visible	Star	ID Score	Mass Accuracy Score	Isotopic Distribution Score	MS2-Score	XIC Score	Analyte Name	Accession Number	Molecular Formula	Molecular Weight	Retention Time (min)	ANOVA (Log10 Precursor Intensity) Comparison Level: Sample Biological Replicate Level: MS Sample	CL	CR	NL	NR	NSiL	NSiR	SiL	SiR
1	TRUE	Empty	0.919	1	0.96	-	0.03	(+)-15S-hydroxy-hexadecanoic acid	INCHIKEY:WQPQDBIUAFINBH-HNNXBMFYSA-N	C 16H 32O 3	272.2	10.46	0.0226086	7.87578	7.70232	7.82653	7.39789	7.62589	7.44866	7.76277	7.58411
2	TRUE	Empty	0.926	0.99	0.97	-	0.76	(±)-threo-1-(4-Hydroxyphenyl)-1,2,3-propanetriol	INCHIKEY:DGMSJCVOBYTYTE-UHFFFAOYNA-N	C 9H 12O 4	184.1	3.08	0.946923	7.56617	-8.62699	7.67265	6.9677	7.48233	7.08031	7.68172	6.11506
3	TRUE	Empty	0.922	0.97		-	0.15	(1R,2R)-3-oxo-2-pentyl-cyclopentanebutanoic acid	INCHIKEY:MQWNXLZVXAQZES-VXGBXAGGSA-N	C 14H 24O 3	240.2	11.21	5.06561e-05	6.66125	6.9684	6.72308	7.19322	6.65439	7.29652	6.88402	6.75775
4	TRUE	Empty	0.937	0.98	0.99	-	0.01	(20S)-1alpha,20,25-trihydroxy-24-norvitamin D3/(20S)-1alpha,20,25-trihydroxy-24-norcholecalciferol	INCHIKEY:LZTXMVHOUSVQPL-XLDAUDPLSA-N	C 26H 42O 4	418.3	19.35	0.531152	7.94388	8.89746	7.50372	8.83651	7.35066	8.67084	8.76873	-8.22968
5	TRUE	Empty	0.944	0.99	0.99	-	0.45	(2R,3R)-(-)-2-Benzyloxy-1,3,4-butanetriol	INCHIKEY:YYGZBCNOJHZTGA-GHMZBOCLSA-N	C 11H 16O 4	212.1	7.5	2.76771e-05	7.42796	7.53364	7.45736	7.63302	7.47423	7.69398	7.44116	7.49122
6	TRUE	Empty	0.709	0.7	0.79	-	0.65	(5E,10E)-19-fluoro-1alpha-hydroxyvitamin-D3 / (5E,10E)-19-fluoro-1alpha-hydroxycholecalciferol	INCHIKEY:SDBKJGWYBRQPAF-GIYOTKTESA-N	C 27H 43FO 2	418.3	17.76	0.00105844	7.86785	8.14302	7.75578	8.11924	7.84789	8.14305	7.90682	8.10022
7	TRUE	Empty	0.942	1	0.99	-	0.11	(7'R,8'R)-4,7'-Epoxy-3',5-dimethoxy-4',9,9'-lignanetriol 9'-glucoside	INCHIKEY:VTKHRLZMWODHJA-UHFFFAOYNA-N	C 26H 34O 11	522.2	7.79	0.00740978	7.68144	7.67934	7.59715	7.94585	7.66044	7.91992	7.64983	7.21552
8	TRUE	Empty	0.93	0.97	0.98	-	0.77	(9Me,4E,8E,10E-d19:3)sphingosine	INCHIKEY:YWSMQDAGCQEIIC-SNNCSWOYSA-N	C 19H 35NO 2	309.3	19.55	0.0477772	7.63324	7.96826	7.76718	7.83272	8.05696	7.82552	8.11013	8.16983
9	TRUE	Empty	0.799	1	0.78	-	0.22	(9R,10S,12Z)-9,10-Dihydroxy-8-oxo-12-octadecenoic acid	INCHIKEY:NIOKCFABUMZUDL-RMKNXTFCNA-N	C 18H 32O 5	328.2	10.88	3.34577e-05	7.93645	-5.56934	7.50739	5.51506	7.7637	6.54418	7.70109	-5.09301
10	TRUE	Empty	0.943	0.98	1	-	0.3	(9R,13R)-10-oxo-11-phytoenoic acid	INCHIKEY:WKABMUFTMQMEAJ-HZPDHXFCSA-N	C 18H 30O 3	294.2	9.02	2.32931e-11	9.20528	7.93603	8.97381	7.56726	9.07905	7.08096	9.10302	7.53835
11	TRUE	Empty	0.762	1	0.72	-	0	(9Z)-(7S,8S)-Dihydroxyoctadecenoic acid	INCHIKEY:WBZXABQRBWTVNN-JINBKUQRSA-N	C 18H 34O 4	314.2	10.58	3.8992e-07	8.22424	7.2931	8.35019	4.98458	8.17048	-4.40338	8.15162	6.97603
12	TRUE	Empty	0.879	0.97	0.91	-	0.05	(E,E)-3,7,11-Trimethyl-2,6,10-dodecatrienyl heptanoate	INCHIKEY:GYXBRSQZIKJSIX-PQBPFAQHSA-N	C 22H 38O 2	334.3	16.52	0.0210218	5.75137	6.85307	5.93577	6.78727	6.35259	7.29209	5.82934	6.90205
13	TRUE	Empty	0.911	0.98	0.95	-	0.52	(E)-2-Methyl-2-buten-1-ol O-beta-D-Glucopyranoside	INCHIKEY:RQSHFEQQQBCYNX-ZZXKWVIFNA-N	C 11H 20O 6	248.1	7.03	1.93956e-05	7.39644	7.55102	7.32486	7.58729	7.37291	7.67775	7.3824	7.4309
14	TRUE	Empty	0.943	0.99	0.99	-	0.87	(R)-14-Methyloxacyclotetradecan-2-one	INCHIKEY:FGDBANZBXSVCEG-UHFFFAOYNA-N	C 14H 26O 2	226.2	12.96	6.02056e-07	8.04992	8.26609	7.99076	8.33727	8.05862	8.3954	8.09469	8.15208
15	TRUE	Empty	0.866	0.96	0.89	-	0.07	(R)C(R)S-S-Propylcysteine sulfoxide	INCHIKEY:JZKMSAGUCSIIAH-UHFFFAOYNA-N	C 6H 13NO 3S	179.1	7.87	9.80931e-05	6.89304	8.9594	-5.61168	8.46886	7.15516	8.31307	7.61228	8.88304
16	TRUE	Empty	1	1	1	-	0.11	(Z)-13-Oxo-9-octadecenoic acid	INCHIKEY:LDYZTLZOFONHNA-VQHVLOKHSA-N	C 18H 32O 3	296.2	10.33	0.0147162	9.95698	9.41184	10.1629	8.88886	10.0925	8.91807	9.99196	9.4509
17	TRUE	Empty	0.946	1	0.99	-	0.95	(Z)-Tamarindienal	INCHIKEY:RFTMILUWMDIPHH-NSCUHMNNSA-N	C 6H 6O 3	126	8.19	4.60137e-06	9.0326	8.16476	8.87839	7.41278	9.03432	8.14914	9.15601	8.21101
18	TRUE	Empty	0.785	0.99	0.76	-	0.12	1-(2,3-Dihydro-1H-pyrrolizin-5-yl)-1-butanone	INCHIKEY:UDBBNHVKMDHCPL-UHFFFAOYSA-N	C 11H 15NO	177.1	9.7	0.0475316	6.70122	7.05415	6.89968	6.9287	6.83265	6.97143	6.82709	6.80573
19	TRUE	Empty	0.757	0.81	0.81	-	0.27	1-(3-Methylbutanoyl)-6-apiosylglucose	INCHIKEY:ZIEQNJFDWXPCBV-UHFFFAOYNA-N	C 16H 28O 11	396.2	8.93	0.0379404	5.82878	7.28773	-6.33643	7.60129	-5.69135	8.03411	-7.2658	6.02794
20	TRUE	Empty	0.937	0.98	0.99	-	0.11	1-(sn-Glycero-3-phospho)-1D-myo-inositol	INCHIKEY:BMVUIWJCUQSHLZ-UJGXJMNGSA-N	C 9H 19O 11P	334.1	9.09	0.00273007	8.31056	8.47779	8.53385	8.91502	8.54768	8.98112	8.33888	8.46464
21	TRUE	Empty	0.869	0.8	0.98	-	0.1	1-Acetoxy-2-hydroxy-5,12,15-heneicosatrien-4-one	INCHIKEY:YLWJMUPPJKELEC-RSWURYEXSA-N	C 23H 38O 4	378.3	16.61	6.37524e-06	7.6825	6.1335	7.71218	-4.56966	7.88162	6.60882	7.84292	-5.20676
22	TRUE	Empty	0.88	0.94	0.92	-	0.83	1-Isothiocyanato-7-(methylthio)heptane	INCHIKEY:LDIRGNDMTOGVRB-UHFFFAOYSA-N	C 9H 17NS 2	203.1	18.69	7.65593e-07	8.75743	9.23248	-7.25407	9.19874	8.21199	9.20988	8.34295	9.21436
23	TRUE	Empty	0.934	0.98	0.99	-	0.93	1-O-(8R-hydroxy-8-methyl-3Z,9-decadienoyl)-beta-D-glucopyranose	INCHIKEY:VSVRDZASVIUYEH-JSJDWEMMSA-N	C 17H 28O 8	360.2	14.23	2.02024e-05	8.86491	9.11303	8.91402	9.13717	8.96218	9.13841	8.97914	9.03499
24	TRUE	Empty	1	0.99	1	0.91	0.78	1-Palmitoylglycerol	INCHIKEY:QHZLMUACJMDIAE-UHFFFAOYNA-N	C 19H 38O 4	330.3	16.3	0.0046001	9.69634	9.81941	9.70597	9.81582	9.71538	9.88294	9.74865	9.8088
25	TRUE	Empty	0.935	0.99	0.98	-	0.79	1,3-Dimethoxybenzene	INCHIKEY:DPZNOMCNRMUKPS-UHFFFAOYSA-N	C 8H 10O 2	138.1	11.1	0.00240252	7.58996	8.55975	7.47347	8.77028	8.3744	8.86587	8.40622	7.87072
26	TRUE	Empty	0.931	1	0.97	-	0.71	1,4-Ipomeadiol	INCHIKEY:AORCXYMSPVAQIZ-UHFFFAOYNA-N	C 9H 14O 3	170.1	19.04	0.0227172	9.19605	9.46212	8.98747	9.51659	9.32074	9.45159	9.0235	9.38552
27	TRUE	Empty	0.915	0.98	0.96	-	0.84	1,5-Dibutyl methyl hydroxycitrate	INCHIKEY:JRMBFEKUMNWOIE-UHFFFAOYSA-N	C 15H 26O 8	334.2	4.64	0.829854	8.99582	9.37604	8.47139	9.13459	9.08797	9.13585	8.97512	9.23386
28	TRUE	Empty	0.927	0.81	0.91	-	0.51	1,5-Dihydroxy-3-methoxy-2-prenylxanthone	INCHIKEY:INFMYEMPDJIILH-UHFFFAOYSA-N	C 19H 18O 5	326.1	8.11	0.000137263	7.15667	8.99946	6.83339	7.24677	6.95557	7.37023	7.18264	7.4252
29	TRUE	Empty	0.911	0.95	0.96	-	0.89	1,8-Octanedithiol	INCHIKEY:PGTWZHXOSWQKCY-UHFFFAOYSA-N	C 8H 18S 2	178.1	19.7	5.10093e-07	9.24504	9.5593	9.065	9.51037	9.21474	9.54849	9.17614	9.54425
30	TRUE	Empty	0.908	0.98	0.95	-	0	10-hydroxy-16-oxo-hexadecanoic acid	INCHIKEY:VGISDMZERQFDDQ-UHFFFAOYSA-N	C 16H 30O 4	286.2	10.46	5.94244e-06	7.73708	7.0068	7.56072	6.69198	7.05634	6.45777	7.33661	6.75842
31	TRUE	Empty	0.939	0.99	0.99	-	0.46	10-Hydroxyloganin	INCHIKEY:GTEDLLYKAJRTNK-UMHDANERSA-N	C 17H 26O 11	406.1	4.51	1.24481e-05	8.02274	6.85149	7.84061	7.34018	7.68825	7.45019	7.79273	6.35329
32	TRUE	Empty	0.946	0.99	1	-	0.44	10-oxo-nonadecanoic acid	INCHIKEY:PEBIXVCZWGYSTN-UHFFFAOYSA-N	C 19H 36O 3	312.3	16.3	0.000288594	8.29121	8.42278	8.28586	8.44445	8.3059	8.52394	8.33798	8.40165
33	TRUE	Empty	1	1	1	-	0.09	10R-HODE	INCHIKEY:XUDNDTZOWNNWHA-HLGVZOAESA-N	C 18H 32O 3	296.2	9.02	5.76237e-10	9.07569	7.84013	8.9215	6.98578	9.03097	6.98737	8.95433	7.38415
34	TRUE	Empty	0.936	0.96	1	-	0.28	12-hydroxy-8E,10E-heptadecadienoic acid	INCHIKEY:INVCGLRLLKLTGP-SIGMCMEVSA-N	C 17H 30O 3	282.2	13.26	0.000294506	6.54992	6.94836	6.47854	7.01569	5.69651	7.3026	6.67998	6.7499
35	TRUE	Empty	0.895	0.97	0.93	-	0.18	12-keto-10,11,14,15-tetrahydro-LTB4	INCHIKEY:RRTYEHFGQWNQKK-KIQAWMAPSA-N	C 20H 34O 4	338.2	17.71	0.0162348	6.43336	7.22561	6.54073	7.44484	6.42885	7.16359	6.92696	6.92892
36	TRUE	Empty	0.948	1	1	-	0.11	12,13-DiHODE	INCHIKEY:RGRKFKRAFZJQMS-OOHFSOINSA-N	C 18H 32O 4	312.2	10.33	2.26388e-11	8.38854	7.61247	8.29209	7.02392	8.29164	7.20716	8.16264	7.59641
37	TRUE	Empty	0.832	0.69	0.98	-	0.3	14alpha-Hydroxy-4beta-deoxypaxilline	INCHIKEY:JFVYPWSFDLYZKB-UHFFFAOYNA-N	C 27H 33NO 4	435.2	13.56	0.00247072	8.41993	8.61583	8.43372	8.76643	8.49224	8.72761	8.546	8.59197
38	TRUE	Empty	0.897	0.96	0.94	-	0.21	15-deoxy-delta-12,14-PGD2	INCHIKEY:QUGBPWLPAUHDTI-PLGLXCLHSA-N	C 20H 30O 4	334.2	18.29	0.000135982	7.32611	7.7895	7.43883	8.00197	7.29813	7.95373	7.53757	7.5012
39	TRUE	Empty	0.938	0.99	0.99	-	0.27	16-hydroxy-9E-hexadecenoic acid	INCHIKEY:RPQJFAIEPUKQHK-HNQUOIGGSA-N	C 16H 30O 3	270.2	10.47	0.00037227	8.53994	8.10016	8.61333	8.06474	8.53209	7.91305	8.41603	7.41805
40	TRUE	Empty	0.896	1	0.92	-	0.01	16:1(10Z)(15Me)	INCHIKEY:RXCFIHNEQCDEAU-VURMDHGXSA-N	C 17H 32O 2	268.2	10.37	3.78988e-10	7.72956	6.90071	7.61372	6.40086	7.683	6.00289	7.64515	6.5699
41	TRUE	Empty	0.948	1	1	-	0.19	16E-octadecenoic acid	INCHIKEY:DPUHOWDIWWPPIP-NSCUHMNNSA-N	C 18H 34O 2	282.3	16.52	2.44157e-08	8.34834	7.85845	8.45681	7.53409	8.53331	7.60028	8.50139	7.71294
42	TRUE	Empty	0.763	0.63	0.9	-	0.26	2-(2-Methylpropoxy)naphthalene	INCHIKEY:XOHIHZHSDMWWMS-UHFFFAOYSA-N	C 14H 16O	200.1	10.48	9.7965e-05	7.60245	8.00061	7.36126	8.136	7.55636	7.92098	7.44048	8.00548
43	TRUE	Empty	0.946	1	0.99	-	0.29	2-Dodecylbenzenesulfonic acid	INCHIKEY:WBIQQQGBSDOWNP-UHFFFAOYSA-N	C 18H 30O 3S	326.2	10.15	0.000178103	8.50388	8.61167	8.49272	8.53862	8.3623	8.59934	8.31063	8.5217
44	TRUE	Empty	0.943	0.99	0.99	-	0.93	2-Ethylglutaric acid	INCHIKEY:QHNBKRVBKPWUKG-UHFFFAOYSA-N	C 7H 12O 4	160.1	8.96	0.0174742	8.10976	8.34416	8.06302	8.56963	7.94217	8.72411	8.31875	8.05197
45	TRUE	Empty	0.892	1	0.91	-	0.63	2-Hydroxy-4-methylbenzaldehyde	INCHIKEY:JODRRPJMQDFCBJ-UHFFFAOYSA-N	C 8H 8O 2	136.1	7.66	0.0465159	7.77361	8.12015	7.85102	7.6933	8.19925	-6.81394	-7.33982	8.1795
46	TRUE	Empty	0.941	1	0.99	-	0.68	2-Isopropyl-1,4-benzenediol	INCHIKEY:HIGSPBFIOSHWQG-UHFFFAOYSA-N	C 9H 12O 2	152.1	19.6	2.08943e-05	8.69172	8.88796	8.68587	8.94344	8.70194	8.98734	8.74473	8.79211
47	TRUE	Empty	0.929	0.99	0.97	-	0.04	2-Isopropyl-5-methoxypyrazine	INCHIKEY:GSVQZEKWEURMLP-UHFFFAOYSA-N	C 8H 12N 2O	152.1	5.99	9.80662e-08	7.72898	8.51574	7.44705	8.45096	7.46267	8.4292	7.31262	8.42246
48	TRUE	Empty	0.997	1	1	1	0.86	2-Keto-3-deoxyoctonic acid	INCHIKEY:NNLZBVFSCVTSLA-UHFFFAOYSA-N	C 8H 14O 8	238.1	8.39	6.57877e-06	9.57816	8.81201	9.44889	8.56411	9.35382	8.61341	9.74135	8.97947
49	TRUE	Empty	0.847	0.84	0.93	-	0.89	2-Keto-6-acetamidocaproate	INCHIKEY:NGCXIFFZXAZRAF-UHFFFAOYSA-N	C 8H 13NO 4	187.1	19.82	9.61981e-06	9.1229	9.48205	8.75909	9.43984	9.18325	9.71702	9.16119	9.4792
50	TRUE	Empty	1	0.99	1	0.94	0.69	2-Linoleoylglycerol	INCHIKEY:IEPGNWMPIFDNSD-HZJYTTRNSA-N	C 21H 38O 4	354.3	15.65	0.0996191	9.39066	8.66795	9.3251	8.88117	8.86449	9.00956	9.57358	9.38303
51	TRUE	Empty	0.72	1	0.66	-	0.74	2-Methyl-1,7-dioxaspiro[5.6]dodecane	INCHIKEY:WLQFFPNTGKKCAI-UHFFFAOYSA-N	C 11H 20O 2	184.1	10.65	0.000831884	7.37164	7.65625	7.41827	8.06713	7.33253	8.13699	7.38887	7.42038
52	TRUE	Empty	0.847	1	0.85	-	0.15	2-Methylpropyl benzoate	INCHIKEY:KYZHGEFMXZOSJN-UHFFFAOYSA-N	C 11H 14O 2	178.1	7.39	0.00139127	7.07608	7.49347	7.20409	7.44108	7.1333	7.51714	7.26151	7.40475
53	TRUE	Empty	0.913	1	0.94	-	0.78	2-Methylpropyl hexanoate	INCHIKEY:UXUPPWPIGVTVQI-UHFFFAOYSA-N	C 10H 20O 2	172.1	7.12	0.000314439	8.76122	9.33374	6.78742	9.3461	7.17901	9.39061	8.77742	9.32489
54	TRUE	Empty	0.747	0.98	0.7	-	0	2-O-(beta-D-galactopyranosyl-(1->6)-beta-D-galactopyranosyl) 2S-hydroxynonanoic acid	INCHIKEY:MMMJHIANFCEHGC-VKIHGLMJSA-N	C 21H 38O 13	498.2	8.49	0.0165353	7.51498	8.07668	7.70428	7.94083	7.69119	7.96668	7.68006	8.09653
55	TRUE	Empty	0.933	0.96	0.99	-	0.16	2-Octenoylcarnitine	INCHIKEY:YMIVWYONPRZBEJ-LXKVQUBZSA-N	C 15H 27NO 4	285.2	10.33	5.50431e-07	7.88798	7.45866	8.03954	6.45771	8.09128	6.11423	7.92043	7.27625
56	TRUE	Empty	0.712	0.68	0.8	-	0.83	2,2-Dihydroperoxypropane	INCHIKEY:XJHMOGCOFPLTNG-UHFFFAOYSA-N	C 3H 8O 4	108	19.99	7.07411e-08	8.96173	9.33777	8.46076	9.31137	8.9177	9.33396	8.80358	9.34182
57	TRUE	Empty	0.934	0.99	0.98	-	0.88	2,3-Dihydro-5-methyl-1H-pyrrolizine-7-carboxaldehyde	INCHIKEY:LNXCMFJNJNUFNW-UHFFFAOYSA-N	C 9H 11NO	149.1	11.4	4.86576e-09	7.78962	8.00229	7.82544	8.06621	7.83112	8.0925	7.83768	7.94921
58	TRUE	Empty	0.942	0.99	0.99	-	0.77	2,3-Methyleneglutaric acid	INCHIKEY:YNNMOGWGBFSMGB-UHFFFAOYSA-N	C 7H 8O 4	156	8.33	0.000134026	8.17084	8.62079	7.63076	8.14593	7.47354	7.85337	8.40141	9.02881
59	TRUE	Empty	0.933	1	0.98	-	0.46	20-oxo-heneicosanoic acid	INCHIKEY:MAGPQMMJCMNJQT-UHFFFAOYSA-N	C 21H 40O 3	340.3	17.76	3.91687e-05	7.49353	7.89012	7.48151	7.87925	7.57522	7.73556	7.59689	7.71845
60	TRUE	Empty	0.937	0.97	0.99	-	0.23	20:2(5Z,11Z)	INCHIKEY:RCYNQXHBZULXMM-GJWNNSPJSA-N	C 20H 36O 2	308.3	10.33	1.44975e-08	7.66469	7.20567	7.74479	6.20944	7.82963	6.71742	7.55594	7.10248
61	TRUE	Empty	0.929	0.99	0.97	-	0.03	26-Desglucoavenacoside B	INCHIKEY:FIGFQPRWCDDAGD-UHFFFAOYNA-N	C 51H 82O 23	1062.5	11.79	0.0454982	7.11216	7.42679	7.36776	7.4423	7.87023	7.34075	7.46158	7.55126
62	TRUE	Empty	0.788	0.65	0.93	-	0.67	3-(1,1-Dimethyl-2-propenyl)-8-(3-methyl-2-butenyl)xanthyletin	INCHIKEY:PIOKBHKPGZHPHS-UHFFFAOYSA-N	C 24H 28O 3	364.2	7.25	0.000101823	7.54658	7.7126	7.57672	7.81093	7.63414	7.88244	7.59973	7.68744
63	TRUE	Empty	0.942	0.98	1	-	0.88	3-(2-Methylpropyl)pyridine	INCHIKEY:DEGXTCKEZCCZOP-UHFFFAOYSA-N	C 9H 13N	135.1	11.08	3.40255e-09	8.09061	8.20845	8.08982	8.28082	8.09967	8.31509	8.09325	8.19557
64	TRUE	Empty	0.809	0.83	0.87	-	0.89	3-[(2E)-2-(Nitromethylidene)hydrazinyl]benzoic acid	INCHIKEY:RASCTTJMDLLADA-WEVVVXLNSA-N	C 8H 7N 3O 4	209	7.65	0.0315258	9.09367	7.94952	8.22738	8.18278	9.18397	8.63471	9.30347	9.05876
65	TRUE	Empty	0.949	1	1	-	0.89	3-Hydroxy-2H-pyran-2-one	INCHIKEY:LIPRKYKMVQPYPG-UHFFFAOYSA-N	C 5H 4O 3	112	9.68	0.0170768	8.77983	7.23946	8.16149	7.26964	8.18595	7.51552	8.51059	6.95945
66	TRUE	Empty	0.926	0.98	0.98	-	0.51	3-Hydroxy-4-methoxymandelate	INCHIKEY:PXMUSCHKJYFZFD-MRVPVSSYSA-N	C 9H 10O 5	198.1	10.19	1.42699e-07	6.20342	8.32753	6.69176	8.56027	6.52349	8.3238	7.46807	8.39425
67	TRUE	Empty	0.941	0.98	1	-	0.08	3-hydroxybutyrylcarnitine	INCHIKEY:UEFRDQSMQXDWTO-UHFFFAOYSA-N	C 11H 21NO 5	247.1	7.17	0.000276398	6.98319	7.19753	7.00172	7.42181	7.07736	7.524	7.08559	7.22217
68	TRUE	Empty	0.874	1	0.89	-	0.83	3-Methyl-3H-imidazo[4,5-f]quinoxalin-2-amine	INCHIKEY:HKZZYGFWIFKKIR-UHFFFAOYSA-N	C 10H 9N 5	199.1	19.73	2.79719e-07	8.4442	9.15688	-7.35975	9.10964	8.33983	9.13969	8.42491	9.13433
69	TRUE	Empty	0.945	0.99	1	-	0.28	3-Methyl-5-pentyl-2-furanundecanoic acid	INCHIKEY:QDTBMEGPXZUECM-UHFFFAOYSA-N	C 21H 36O 3	336.3	15.61	9.29011e-05	8.02917	7.80702	8.00107	7.57296	8.0863	7.62722	8.2107	7.8527
70	TRUE	Empty	1	1	0.98	-	0.95	3-Methylglutaconic acid	INCHIKEY:WKRBKYFIJPGYQC-DUXPYHPUSA-N	C 6H 8O 4	144	8.42	9.43527e-08	9.61251	8.62964	9.45389	8.28303	9.5781	7.84223	9.77339	8.69796
71	TRUE	Empty	0.885	0.97	0.91	-	0.28	3-O-alpha-L-rhamnopyranosyl-3-hydroxydecanoic acid	INCHIKEY:ULYNCQBACUVFJM-YWNUTFMVSA-N	C 16H 30O 7	334.2	14.81	7.28065e-05	8.47544	8.74517	8.55987	8.81552	8.50702	8.81659	8.61543	8.6588
72	TRUE	Empty	1	1	1	-	0.97	3-O-Caffeoylshikimic acid	INCHIKEY:QMPHZIPNNJOWQI-RQOWECAXNA-N	C 16H 16O 8	336.1	7.92	4.318e-05	9.95458	11.1272	9.84338	10.6819	9.69324	10.4424	10.1333	11.3165
73	TRUE	Empty	0.888	0.86	0.98	-	0.84	3-oxopimelic acid	INCHIKEY:IYNRULSFFKEOLT-UHFFFAOYSA-N	C 7H 10O 5	174.1	19.56	1.82696e-07	8.55942	9.22543	-7.48362	9.18958	8.50667	9.19924	8.54638	9.2278
74	TRUE	Empty	0.895	0.97	0.93	-	0	3-p-Coumaroylquinic acid	INCHIKEY:BMRSEYFENKXDIS-FASCMIHUSA-N	C 16H 18O 8	338.1	5.53	0.000816257	6.7106	7.20033	6.63999	6.57619	6.71272	6.57062	6.96117	7.45348
75	TRUE	Empty	0.766	0.97	0.74	-	0.67	3-Phenylpropyl glucosinolate	INCHIKEY:AAVHHGNQWFTUKS-SFQUDFHCNA-N	C 16H 23NO 9S 2	437.1	9.63	0.000325154	8.77006	7.73095	8.99513	7.50214	8.74732	-5.51655	9.18871	8.15246
76	TRUE	Empty	0.838	1	0.83	-	0.61	3,5,7-Trihydroxyflavone 3-glucoside-8-sulfate	INCHIKEY:IFHBLQSSJDMWJS-DLBNBXSVSA-N	C 21H 20O 13S	512.1	6.36	2.15818e-07	9.16367	8.18824	9.13517	7.76044	9.02483	6.51431	9.16908	-6.67846
77	TRUE	Empty	0.856	0.68	0.87	-	0.74	3,7-Dihydroxy-2-[4-hydroxy-3-(4-hydroxy-3-methylbutyl)phenyl]-5,6-dimethoxy-4H-1-benzopyran-4-one	INCHIKEY:QKQBCMSTNUQLPW-UHFFFAOYSA-N	C 22H 24O 8	416.1	9.59	1.41828e-05	8.92542	7.9185	9.10685	7.54138	8.85543	7.32842	9.2267	8.25456
78	TRUE	Empty	0.877	0.89	0.95	-	0.15	3',5'-cyclic dAMP	INCHIKEY:MKMZAENVDZADSW-RRKCRQDMSA-N	C 10H 12N 5O 5P	313.1	8.61	0.0180478	7.68774	8.55127	8.55985	8.44834	8.74667	7.39657	7.65503	8.12824
79	TRUE	Empty	0.937	1	0.98	-	0.85	3Z-nonenal	INCHIKEY:YXEAENVLZOODMT-SREVYHEPSA-N	C 9H 16O	140.1	11.07	0.00235024	7.85645	7.94336	7.99942	8.17489	7.86773	8.39348	7.78709	7.89649
80	TRUE	Empty	0.925	1	0.96	-	0.34	3Z,6Z,9Z-Octadecatrienyl acetate	INCHIKEY:BNPSOFTUHIKBRZ-NWFXIAEYSA-N	C 20H 34O 2	306.3	9.92	1.72722e-10	7.80939	6.24958	7.91556	5.72338	7.91283	5.3708	7.7984	6.44455
81	TRUE	Empty	0.948	0.99	1	-	0.13	4-Hydroxy-5-(3',4'-dihydroxyphenyl)-valeric acid-O-methyl-O-glucuronide	INCHIKEY:KRZPFELARLSRKT-UHFFFAOYSA-N	C 18H 26O 12	434.1	4.97	0.000652092	7.81806	7.90119	7.74123	8.09425	7.70256	8.02707	7.8745	7.82786
82	TRUE	Empty	0.942	0.99	0.99	-	0.47	4-Hydroxy-5-(3',5'-dihydroxyphenyl)-valeric acid-O-methyl-O-glucuronide	INCHIKEY:NLJOFAILECLFIF-UHFFFAOYSA-N	C 18H 26O 12	434.1	7.02	0.00674193	7.68087	7.63143	7.14018	7.57332	7.29154	6.12559	7.86627	-6.43245
83	TRUE	Empty	0.925	0.99	0.97	-	0.92	4-Hydroxy-Benzotriazol	INCHIKEY:NPZTUJOABDZTLV-UHFFFAOYSA-N	C 6H 5N 3O	135	19.89	5.82285e-05	9.4191	9.65759	9.11068	9.62927	9.41615	9.62181	9.4338	9.65896
84	TRUE	Empty	0.731	1	0.67	-	0.9	4-Methylbenzotriazole	INCHIKEY:CMGDVUCDZOBDNL-UHFFFAOYSA-N	C 7H 7N 3	133.1	19.36	0.000213347	9.54167	9.8097	9.44468	9.76837	9.65628	9.7795	9.63328	9.81462
85	TRUE	Empty	0.948	1	1	-	0.25	4-O-alpha-D-Glucopyranuronosyl-D-galactose	INCHIKEY:KJBWXIYXECDDOT-UHFFFAOYNA-N	C 12H 20O 12	356.1	9.48	0.0469655	8.20612	8.10177	8.23868	8.24628	8.22173	8.12084	8.58525	8.46012
86	TRUE	Empty	0.718	0.62	0.84	-	0.71	4-Trifluoromethylphenol	INCHIKEY:BAYGVMXZJBFEMB-UHFFFAOYSA-N	C 7H 5F 3O	162	2.27	4.36781e-06	-5.15719	8.58987	5.59496	8.41324	-6.12971	8.25659	7.83425	8.7946
87	TRUE	Empty	0.944	0.99	1	-	0.96	4,4'-Thiodiphenol	INCHIKEY:VWGKEVWFBOUAND-UHFFFAOYSA-N	C 12H 10O 2S	218	13.66	4.12081e-06	8.97748	9.19705	9.01769	9.22094	9.04026	9.24494	9.04479	9.16487
88	TRUE	Empty	0.896	0.88	0.98	-	0.61	4,5-Dihydro-drospirenone-3-sulfate	INCHIKEY:ZHIWICDXDMTIEM-TYRGJQATNA-N	C 24H 34O 5S	434.2	13.68	5.26467e-05	7.24297	7.73452	7.34992	8.117	7.41797	8.11147	7.48208	7.55866
89	TRUE	Empty	0.924	0.99	0.96	-	0.24	4,6-Tricosanedione	INCHIKEY:OSWNBDSFXXEWTJ-UHFFFAOYSA-N	C 23H 44O 2	352.3	17.64	0.000263802	7.3799	7.82425	7.25835	7.93501	7.49266	7.64294	7.70501	7.67362
90	TRUE	Empty	0.86	0.77	0.98	-	0.13	4'-Hydroxy-5,5'-diisopropyl-2,2'-dimethyl-3,4-biphenylquinone	INCHIKEY:SFQOHOOISXSOPJ-UHFFFAOYSA-N	C 20H 24O 3	312.2	9.79	0.0437533	8.28094	8.32151	8.27239	8.28094	8.20585	8.35816	8.10135	8.30459
91	TRUE	Empty	0.843	0.86	0.91	-	0.13	4'-Methyl-(-)-epigallocatechin 3-(4-methyl-gallate)	INCHIKEY:HFWSXNDMKGHKRD-VSVVGSIZNA-N	C 24H 22O 11	486.1	5.96	1.18267e-11	6.87886	8.37011	6.73135	8.31803	6.51415	8.31479	6.83166	8.34073
92	TRUE	Empty	0.994	1	0.99	0.99	0.81	5-Acetyl-2-hydroxybenzoic acid	INCHIKEY:NZRDKNBIPVLNHA-UHFFFAOYSA-N	C 9H 8O 4	180	2.08	0.000240869	8.48704	9.25588	6.79866	9.00157	6.55106	8.8391	8.31856	9.45434
93	TRUE	Empty	0.861	0.89	0.92	-	0.86	5-Amino-1-(5-phospho-D-ribosyl)imidazole	INCHIKEY:PDACUKOKVHBVHJ-ZRTZXPPTSA-N	C 8H 14N 3O 7P	295.1	8.91	0.00977915	6.07094	9.12175	5.48188	8.98257	6.11418	8.24124	5.62248	8.57905
94	TRUE	Empty	0.835	1	0.83	-	0.83	5-Butyltetrahydro-2-oxo-3-furancarboxylic acid	INCHIKEY:XCIYLBHMPNYNTF-UHFFFAOYNA-N	C 9H 14O 4	186.1	5.5	0.83345	9.97047	9.80253	9.29537	9.37503	9.41916	9.3978	9.95098	9.73941
95	TRUE	Empty	0.913	0.99	0.95	-	0.43	5-ethyl-5-methyl-2,4-oxazolidinedione	INCHIKEY:MGHNWMRNFGYJKE-UHFFFAOYNA-N	C 6H 9NO 3	143.1	8.43	0.000258676	7.81255	8.31818	7.54229	8.1779	7.30894	8.06012	7.4557	8.0824
96	TRUE	Empty	0.944	0.99	0.99	-	0.81	5-Hexyltetrahydro-2-oxo-3-furancarboxylic acid	INCHIKEY:ZHNHBUOFMLNZNN-UHFFFAOYNA-N	C 11H 18O 4	214.1	10.32	0.0482937	-8.80872	9.56442	-8.89115	9.49897	9.43976	9.5987	9.44556	9.54233
97	TRUE	Empty	0.916	0.82	0.89	-	0.88	5-Hydroxy-6,7,8,4'-tetramethoxyflavanone	INCHIKEY:SGWLCEXRWADMOA-UHFFFAOYSA-N	C 19H 20O 7	360.1	7.99	8.78648e-07	9.22396	7.51259	9.56201	6.36261	9.24655	-6.74321	9.72188	7.66311
98	TRUE	Empty	0.945	0.99	1	-	0.01	5-Hydroxy-7,4'-dimethoxy-6,8-di-C-prenylflavanone 5-O-galactoside	INCHIKEY:AQXMPPOEJPDCFL-UHFFFAOYSA-N	C 25H 30O 10	490.2	6.2	3.26899e-10	6.97973	8.54488	7.17747	8.34314	7.17022	8.31467	7.38391	8.3276
99	TRUE	Empty	0.942	0.99		-	0.16	5-Hydroxy-7,8-dimethoxyflavanone 5-rhamnoside	INCHIKEY:VPGZAAVNFQFLSM-HMJWZANZSA-N	C 23H 26O 9	446.2	5.98	0.000355025	6.60228	7.63508	6.8705	7.53701	6.78648	7.24612	7.12167	7.82762
100	TRUE	Empty	0.823	0.78	0.92	-	0.57	5-Methylthioribose 1-phosphate	INCHIKEY:JTFITTQBRJDSTL-KVTDHHQDSA-N	C 6H 13O 7PS	260	10.23	0.00547216	-7.35748	8.66289	-7.58358	N.A.	7.45831	8.6694	-7.80226	8.84247
101	TRUE	Empty	1	1	0.99	-	0.96	5-Oxoprolinate	INCHIKEY:ODHCTXKNWHHXJC-UHFFFAOYNA-N	C 5H 7NO 3	129	8.75	0.0595908	9.81921	9.44655	10.1934	9.85641	10.0376	9.89913	9.7258	9.88007
102	TRUE	Empty	0.946	1	1	-	0.72	5,7-Icosanedione	INCHIKEY:CJHBQGYRPYRMEB-UHFFFAOYSA-N	C 20H 38O 2	310.3	16.34	0.000529357	7.71199	7.98144	7.6586	8.0336	7.70033	8.00526	7.76663	7.7726
103	TRUE	Empty	0.946	1	1	-	0.5	5,9-octadecadiynoic acid	INCHIKEY:HWCVHTFNKLJJOX-UHFFFAOYSA-N	C 18H 28O 2	276.2	8.64	3.96952e-11	9.00693	7.88303	9.14823	5.78995	9.24654	5.66627	8.85619	6.59082
104	TRUE	Empty	0.938	0.97	1	-	0.74	5'-Carboxy-gamma-chromanol	INCHIKEY:CNGKBUHOCIWLHJ-ADLMAVQZSA-N	C 18H 26O 4	306.2	15.8	8.3352e-07	6.99962	8.2017	7.03447	8.32544	6.62011	8.11362	7.54781	8.30474
105	TRUE	Empty	0.935	0.98	0.99	-	0.67	5S,15S-diHPETE	INCHIKEY:PCIOUQYHTPPZEM-BVHTXILBSA-N	C 20H 32O 6	368.2	11.53	0.000441128	8.23789	8.01054	8.09447	8.05959	7.93617	8.09138	8.05242	7.90708
106	TRUE	Empty	0.908	0.98	0.95	-	0.45	6-Epi-7-isocucurbic acid glucoside	INCHIKEY:GJZJZRWFRZFTEE-ONEGZZNKNA-N	C 18H 30O 8	374.2	5.97	0.0471546	8.55416	8.65573	8.54066	6.82484	7.53561	6.54112	8.62215	6.6335
107	TRUE	Empty	0.772	0.81	0.83	-	0.89	6-Feruloylglucose 2,3,4-trihydroxy-3-methylbutylglycoside	INCHIKEY:BZWPYDSZGOMZNC-GQCTYLIANA-N	C 21H 30O 12	474.2	9.05	0.00216581	9.1283	9.9352	9.33393	10.0021	8.96554	10.1216	9.50869	10.258
108	TRUE	Empty	0.709	1	0.99	0.42	0.66	6-Sialylgalactose	INCHIKEY:ZWJUGLBUMFWRAR-TXFPQSCTSA-N	C 17H 29NO 14	471.2	8.97	0.00186175	7.41491	7.88909	7.85099	8.52099	7.35108	8.70764	7.77557	8.62904
109	TRUE	Empty	0.936	0.97	0.99	-	0.29	6,10,14-Trimethyl-5,9,13-pentadecatrien-2-one	INCHIKEY:LTUMRKDLVGQMJU-HSVQFRAPSA-N	C 18H 30O	262.2	15.77	2.43342e-06	8.33443	8.07865	8.24281	7.91556	8.30179	7.96009	8.40878	8.1011
110	TRUE	Empty	0.901	0.99	0.93	-	0.8	6S-methyl-octanoic acid	INCHIKEY:GPOPHQSTNHUENT-QMMMGPOBSA-N	C 9H 18O 2	158.1	5.99	0.0396956	9.28927	9.56803	6.97183	9.57755	-8.30994	9.63825	-8.753	9.57369
111	TRUE	Empty	1	1	1	-	0.55	7E,9Z,12Z-octadecatrienoic acid	INCHIKEY:RTILLKWKMLNKLK-JSHIYTDESA-N	C 18H 30O 2	278.2	10.06	5.72875e-14	10.0458	9.05511	10.4222	8.72649	10.3532	8.64208	10.1404	8.9841
112	TRUE	Empty	0.972	0.99	1	0.95	0.37	8,11,14-Eicosatriynoic acid	INCHIKEY:QLLIWTBTVOPGCM-UHFFFAOYSA-N	C 20H 28O 2	300.2	9.19	3.24535e-07	6.87242	7.46424	-5.70692	7.43933	6.5856	7.51201	6.36408	7.38037
113	TRUE	Empty	0.946	0.99	1	-	0.33	8E-Tetradecenyl acetate	INCHIKEY:VZGHIFSDFDWSOD-BQYQJAHWSA-N	C 16H 30O 2	254.2	9.97	2.9976e-15	8.77802	7.86579	8.9891	7.69536	9.03796	7.59	8.84124	7.69383
114	TRUE	Empty	0.945	0.99	1	-	0.42	9-hexadecenal	INCHIKEY:QFPVVMKZTVQDTL-BQYQJAHWSA-N	C 16H 30O	238.2	16.29	0.00310501	7.84327	7.88382	7.65184	7.92948	7.82979	8.00149	7.76194	7.87497
115	TRUE	Empty	0.958	1	1	0.92	0.05	9-HPODE	INCHIKEY:JGUNZIWGNMQSBM-KPWHUNMNSA-N	C 18H 32O 4	312.2	8.02	5.34112e-08	9.10803	8.13935	9.10326	6.92065	8.97772	7.68564	8.9472	7.94046
116	TRUE	Empty	0.849	0.83	0.93	-	0.5	9'-Carboxy-gamma-chromanol	INCHIKEY:ODQOKHVJIYTOQE-NXHTTZLHSA-N	C 23H 36O 4	376.3	15.66	0.000907462	8.44781	8.21716	8.40582	7.98519	8.47254	8.18492	8.56909	8.27488
117	TRUE	Empty	0.929	0.99	0.97	-	0.09	9S-hydroxy-10S,11S-epoxy-12Z,15Z-octadecadienoic acid	INCHIKEY:OAIJQUCVLFETGX-OYWKBIDZSA-N	C 18H 30O 4	310.2	9.78	8.67028e-09	8.81618	8.03825	9.15324	5.79905	9.19061	-4.57935	8.70384	7.39297
118	TRUE	Empty	0.903	1	0.93	-	0.19	9Z-Dodecenal	INCHIKEY:QGUDMPDYXLMJNK-ARJAWSKDSA-N	C 12H 22O	182.2	13.08	0.000495748	7.26083	7.48972	7.15324	7.32142	7.29958	7.49003	7.19749	7.28868
119	TRUE	Empty	1	1	0.91	0.94	0.84	Adenine	INCHIKEY:GFFGJBXGBJISGV-UHFFFAOYSA-N	C 5H 5N 5	135.1	5.8	0.000185674	10.0525	9.31888	10.4599	9.20084	10.3359	9.19108	10.0466	9.44526
120	TRUE	Empty	0.988	0.98	0.98	1	0.93	ADENOSINE	INCHIKEY:OIRDTQYFTABQOQ-UHFFFAOYSA-N	C 10H 13N 5O 4	267.1	5.9	8.40819e-06	9.52968	9.15003	8.66671	7.66649	9.1647	7.49051	10.1968	6.90166
121	TRUE	Empty	0.997	1	1	1	0.1	Allantoic acid	INCHIKEY:NUCLJNSWZCHRKL-UHFFFAOYSA-N	C 4H 8N 4O 4	176.1	8.5	0.000117005	7.3237	8.62713	6.02094	7.31755	5.4895	7.18157	7.26857	8.89942
122	TRUE	Empty	0.806	0.88	0.84	-	0.65	Allithiamine	INCHIKEY:WNCAVNGLACHSRZ-SDNWHVSQSA-N	C 15H 22N 4O 2S 2	354.1	8.38	4.9876e-08	9.48878	8.72334	9.28361	-5.76291	9.34461	8.17322	9.89772	9.79091
123	TRUE	Empty	0.871	0.83	0.97	-	0.3	Aloe emodin w-acetate	INCHIKEY:FUECAILUKAJTBR-UHFFFAOYSA-N	C 17H 12O 6	312.1	6.77	0.0170953	6.24127	7.75688	8.0658	8.04542	6.33465	7.79987	8.06204	6.35898
124	TRUE	Empty	0.927	0.97	0.98	-	0.05	alpha-Furyl methyl diketone	INCHIKEY:JXZJRYDTSDCGLO-UHFFFAOYSA-N	C 7H 6O 3	138	6.61	0.00171883	7.64049	5.66412	7.61951	7.42886	7.68387	7.49465	7.80813	-6.59879
125	TRUE	Empty	0.941	0.98	1	-	0.17	alpha-Hydroxymetoprolol	INCHIKEY:OFRYBPCSEMMZHR-UHFFFAOYNA-N	C 15H 25NO 4	283.2	9.92	2.3424e-09	8.11986	6.5535	8.36609	5.44399	8.32732	-5.48177	8.12556	6.5688
126	TRUE	Empty	0.779	0.62	0.93	-	0.79	alpha,alpha'-diethyl-4,4'-bis(2-propynyloxy)stilbene	INCHIKEY:LCTYVHULSYWGNJ-WCWDXBQESA-N	C 24H 24O 2	344.2	13.1	0.000169148	8.91576	9.17274	8.99376	9.20109	9.00284	9.18804	9.04619	9.09348
127	TRUE	Empty	0.989	0.98	1	0.98	0.29	Anandamide (18:2, n-6)	INCHIKEY:KQXDGUVSAAQARU-HZJYTTRNSA-N	C 20H 37NO 2	323.3	14.88	2.11879e-11	8.46596	7.35489	8.60185	7.08441	8.55555	6.94875	8.57003	7.32435
128	TRUE	Empty	0.899	0.9	0.97	-	0.94	Arginyl-Phenylalanine	INCHIKEY:PQBHGSGQZSOLIR-UHFFFAOYSA-N	C 15H 23N 5O 3	321.2	10.6	0.00400174	9.22203	9.41413	9.27946	9.41831	9.30975	9.42547	9.28786	9.37545
129	TRUE	Empty	0.92	0.99	0.96	-	0.4	Armillaripin	INCHIKEY:BGKXQRPQNIXIMH-UHFFFAOYNA-N	C 24H 30O 6	414.2	13.2	0.000936183	7.47359	7.68958	7.37523	7.63152	7.46988	7.9933	7.3687	7.68577
130	TRUE	Empty	0.842	0.89	0.89	-	0.53	Asparaginyl-Histidine	INCHIKEY:FFMIYIMKQIMDPK-UHFFFAOYSA-N	C 10H 15N 5O 4	269.1	8.74	0.00275206	9.14691	7.71327	9.28435	7.48405	9.05066	7.97743	9.36067	8.49772
131	TRUE	Empty	0.935	0.99	0.98	-	0.75	Aspartyl-Glutamine	INCHIKEY:GSMPSRPMQQDRIB-UHFFFAOYSA-N	C 9H 15N 3O 6	261.1	8.96	0.00862185	7.87642	8.17815	10.3357	9.27882	9.4415	9.82912	7.69021	9.86167
132	TRUE	Empty	0.923	1	0.96	-	0.08	Asterlingulatoside D	INCHIKEY:ZXFNMDBLCLWZIE-UHFFFAOYNA-N	C 57H 92O 25	1176.6	9.33	4.89838e-05	7.87187	8.243	7.65247	8.31508	7.80384	8.21058	7.93633	8.45932
133	TRUE	Empty	0.995	1	0.99	1	0.25	Astragalin	INCHIKEY:JPUKWEQWGBDDQB-QSOFNFLRSA-N	C 21H 20O 11	448.1	4.85	3.289e-08	8.12181	5.94479	8.12497	5.42901	8.34955	-5.75179	8.24898	5.49772
134	TRUE	Empty	0.942	0.98	1	-	0.52	Avocadene 2-acetate	INCHIKEY:LUIGTZGBXWZJAX-UHFFFAOYNA-N	C 19H 36O 4	328.3	15.78	0.00356311	8.31335	7.50854	8.41458	7.5545	8.48659	7.27494	8.40788	7.00305
135	TRUE	Empty	0.93	0.99	0.97	-	0.79	Benzoylmalic acid	INCHIKEY:NVPJTXMOQCANSN-UHFFFAOYNA-N	C 11H 10O 6	238	8.21	6.62855e-09	9.15681	8.19667	8.99018	7.65602	8.97875	7.63885	9.27087	8.37348
136	TRUE	Empty	0.935	1	0.98	-	0.54	Benzyl O-[arabinofuranosyl-(1->6)-glucoside]	INCHIKEY:VLAZYPZGDJXPDY-UHFFFAOYNA-N	C 18H 26O 10	402.2	5.82	0.000320531	7.5687	8.70972	-6.54107	8.6962	7.327	7.2604	-5.999	7.80756
137	TRUE	Empty	0.892	0.9	0.96	-	0.56	Berteroin	INCHIKEY:HBVIMVJTUQNSEP-UHFFFAOYSA-N	C 7H 13NS 2	175	2.86	0.0308935	6.15153	-7.49349	8.67146	-5.64828	8.65952	-5.72781	5.82078	-7.48574
138	TRUE	Empty	0.862	1	0.87	-	0.8	beta-(2-Methoxyphenoxy)-lactic acid	INCHIKEY:MXVBBOLVTSAHEX-UHFFFAOYNA-N	C 10H 12O 5	212.1	2.05	0.000145794	8.06347	8.27823	8.5701	8.25633	8.35311	7.86834	8.02738	-7.31554
139	TRUE	Empty	0.939	0.99	0.99	-	0.98	beta-cyano-L-alanine	INCHIKEY:OIVLITBTBDPEFK-UHFFFAOYSA-N	C 4H 6N 2O 2	114	8.95	0.00671749	8.82412	9.297	9.05354	9.20864	9.23289	9.12411	8.88084	9.10217
140	TRUE	Empty	0.766	0.69	0.88	-	0.58	Bis(2-furanylmethyl) sulfide	INCHIKEY:UYLKDZXJEKFFHJ-UHFFFAOYSA-N	C 10H 10O 2S	194	8.48	0.00162199	7.85473	6.03693	7.45846	7.05559	7.98654	7.19963	7.03507	-5.99714
141	TRUE	Empty	0.835	0.93	0.86	-	0.88	Butyl isopropyl disulfide	INCHIKEY:HODYAASMHKKQBS-UHFFFAOYSA-N	C 7H 16S 2	164.1	19.78	0.02985	9.42737	9.70236	-8.85442	9.59729	9.49207	9.67252	9.48936	9.69937
142	TRUE	Empty	0.94	1	0.99	-	0.05	C11354	INCHIKEY:VPGPQVKJUYKKNN-AWYLAFAOSA-N	C 6H 8O 3	128	8.96	0.0249343	7.67912	7.69928	7.56209	7.74119	7.49297	7.68703	7.39128	7.56409
143	TRUE	Empty	0.941	0.98	1	-	0.67	C17 Sphingosine	INCHIKEY:RBEJCQPPFCKTRZ-LHMZYYNSSA-N	C 17H 35NO 2	285.3	14.8	3.06117e-05	7.84435	8.16766	7.83403	8.23885	7.93365	8.19671	7.92983	7.97191
144	TRUE	Empty	0.984	1	0.99	0.97	0.85	Caffeic acid	INCHIKEY:QAIPRVGONGVQAS-DUXPYHPUSA-N	C 9H 8O 4	180	7.97	1.14732e-07	8.2578	9.89165	7.92065	9.40129	8.15735	9.18999	8.59314	10.0653
145	TRUE	Empty	0.809	0.8	0.89	-	0.19	Calcitroic acid	INCHIKEY:MBLYZRMZFUWLOZ-WLWRUGSRSA-N	C 23H 34O 4	374.2	15.18	1.53001e-06	7.99929	7.13565	8.1401	-5.0034	8.09113	-6.50781	8.26254	6.41287
146	TRUE	Empty	0.942	1	0.99	-	0.81	Calystegin A3	INCHIKEY:XOCBOVUINUHZJA-UHFFFAOYNA-N	C 7H 13NO 3	159.1	7.82	0.0252983	8.07161	8.12805	7.94433	7.74182	8.14994	7.80724	8.36719	7.2458
147	TRUE	Empty	0.911	1	0.94	-	0	Candesartan O-glucuronide	INCHIKEY:IQMPSFXZXNRDMY-QJQVECKKNA-N	C 30H 28N 6O 9	616.2	6.19	8.48803e-06	7.00484	7.80953	7.13297	7.90017	6.72995	7.92972	7.05397	7.99881
148	TRUE	Empty	0.926	1	0.96	-	0.56	Carthamidin	INCHIKEY:NPLTVGMLNDMOQE-UHFFFAOYSA-N	C 15H 12O 6	288.1	6.39	0.00145179	8.07523	7.24978	7.62079	7.41151	7.62641	7.5509	7.91754	7.27782
149	TRUE	Empty	0.989	0.99	1	0.98	0.98	Catechin	INCHIKEY:PFTAWBLQPZVEMU-DZGCQCFKSA-N	C 15H 14O 6	290.1	7.64	0.00181385	10.2514	9.78381	-9.48827	9.53424	10.0498	9.05079	10.4078	10.094
150	TRUE	Empty	0.864	0.99	0.87	-	0.41	Cellulose, microcrystalline	INCHIKEY:PTHCMJGKKRQCBF-UHFFFAOYNA-N	C 14H 26O 11	370.1	9.03	0.000111953	7.37338	7.32355	5.95559	7.32189	-4.42959	7.10413	5.91424	7.46148
151	TRUE	Empty	0.832	0.78	0.93	-	0.7	Ceriporic acid C	INCHIKEY:BQGIGMHUCMNPDK-OEIFXAAASA-N	C 21H 36O 4	352.3	16.3	0.000954697	8.21964	8.38868	8.21711	8.44633	-7.63144	8.5545	8.23358	8.42818
152	TRUE	Empty	0.849	0.75	0.97	-	0.22	Chinenoside I	INCHIKEY:JLPOKVNPMNEDMF-UHFFFAOYNA-N	C 49H 80O 23	1036.5	11.63	4.61593e-06	7.76993	7.13684	7.88601	6.98651	7.91006	6.59249	7.95032	6.69665
153	TRUE	Empty	0.815	0.63	0.98	-	0.65	Chrysaloin	INCHIKEY:RZCVGOHQLRNJKQ-UHFFFAOYNA-N	C 21H 22O 8	402.1	9.03	4.89393e-06	7.40324	8.36321	6.89303	8.55298	6.60337	8.44061	7.87155	8.5159
154	TRUE	Empty	0.908	1	0.94	-	0.49	cis-3-Hexenyl benzoate	INCHIKEY:BCOXBEHFBZOJJZ-ARJAWSKDSA-N	C 13H 16O 2	204.1	9.65	4.56249e-06	7.30722	7.51694	7.34569	7.54444	7.4061	7.55755	7.3652	7.42427
155	TRUE	Empty	0.995	1	0.99	1	0.98	Citrulline	INCHIKEY:RHGKLRLOHDJJDR-BYPYZUCNSA-N	C 6H 13N 3O 3	175.1	9.33	0.462582	10.4165	10.1529	10.6958	10.3212	10.4843	10.3156	10.2848	10.2845
156	TRUE	Empty	0.862	0.84	0.95	-	0.7	Citrusin C	INCHIKEY:VADSVXSGIFBZLI-UHFFFAOYNA-N	C 16H 22O 7	326.1	8.67	5.98433e-05	8.84368	7.54665	9.28734	8.0656	9.27392	6.77831	8.84916	7.59749
157	TRUE	Empty	0.851	0.81	0.89	0.63	0.04	Cysteineglutathione disulfide	INCHIKEY:BNRXZEPOHPEEAS-PPSBICQBSA-N	C 13H 22N 4O 8S 2	426.1	4.62	0.000622917	8.03893	8.40631	7.8774	8.44406	7.96799	8.45359	8.04288	8.20926
158	TRUE	Empty	0.948	1	1	-	0.97	D-(-)-Fructose	INCHIKEY:RFSUNEUAIZKAJO-VRPWFDPXSA-N	C 6H 12O 6	180.1	9.83	0.00290207	9.95673	9.45883	10.2339	9.45151	10.1237	9.45551	10.0885	9.68105
159	TRUE	Empty	0.934	0.99	0.98	-	0.43	D-erythro-L-galacto-Nonulose	INCHIKEY:USEZWDIVUDJKCA-UHFFFAOYNA-N	C 9H 18O 9	270.1	9.74	0.174657	8.4525	8.25152	8.73776	8.36995	8.90457	8.04251	8.6871	8.17754
160	TRUE	Empty	0.943	1	0.99	-	0.9	D-Gluconic acid Mn(II) salt	INCHIKEY:RGHNJXZEOKUKBD-UHFFFAOYNA-N	C 6H 12O 7	196.1	8.44	7.01127e-07	8.85639	8.375	9.06959	8.21982	9.07274	8.25316	8.98754	8.64458
161	TRUE	Empty	0.914	0.83	0.89	0.96	0.19	D-Ribose 5-phosphate	INCHIKEY:FNZLKVNUWIIPSJ-UHNVWZDZSA-N	C 5H 11O 8P	230	9.25	0.00471027	-7.11467	7.61053	-4.25459	8.02742	-5.31442	7.94332	-7.08819	-6.31557
162	TRUE	Empty	0.99	1	1	0.98	0.91	D-Tryptophan	INCHIKEY:QIVBCDIJIAJPQS-SECBINFHSA-N	C 11H 12N 2O 2	204.1	7.67	0.0401887	8.92231	9.34129	8.97162	9.45264	9.24601	8.97715	9.06899	8.87048
163	TRUE	Empty	0.887	0.94		-	0	D-Urobilin	INCHIKEY:DOKCNDVEPDZOJQ-MBTHVWNTSA-N	C 33H 40N 4O 6	588.3	9.06	0.0171303	-5.21083	6.55742	5.93218	7.755	-6.88629	6.65927	7.48922	7.82307
164	TRUE	Empty	0.766	0.6	0.92	-	0.51	Danazol	INCHIKEY:POZRVZJJTULAOH-LHZXLZLDSA-N	C 22H 27NO 2	337.2	17.93	0.00181335	8.51487	8.70941	8.50333	8.8148	8.48543	8.90986	8.58334	8.6609
165	TRUE	Empty	0.866	0.91	0.92	-	0.8	Dehydropachyrrhizone	INCHIKEY:MSXPSNDSSMJJME-UHFFFAOYSA-N	C 20H 12O 7	364.1	8.29	2.55766e-05	10.4299	7.93436	10.1583	7.89091	10.3793	7.82464	10.7366	7.95921
166	TRUE	Empty	0.946	1	0.99	-	0.72	Demissine	INCHIKEY:KWRYHKRVKRBBBU-UHFFFAOYNA-N	C 50H 83NO 20	1017.6	11.71	0.000119859	9.1372	8.94754	9.41447	8.75491	9.50913	8.76237	9.3775	8.70027
167	TRUE	Empty	0.888	0.91	0.95	-	0.24	DG(20:5(5Z,8Z,11Z,14Z,17Z)/0:0/20:5(5Z,8Z,11Z,14Z,17Z)) (d5)	INCHIKEY:TXYVJIXIUGRAFF-VSBNSUKNSA-N	C 43H 64O 5	665.5	16.3	1.9239e-05	7.71854	7.93324	7.77959	7.99536	7.79286	8.07989	7.73834	7.92396
168	TRUE	Empty	0.785	0.97	0.77	-	0.33	Dibutyl malate	INCHIKEY:PDSCSYLDRHAHOX-UHFFFAOYNA-N	C 12H 22O 5	246.1	18.9	0.000295373	8.20921	8.5227	8.29701	8.67896	8.26463	8.66501	8.3436	8.38965
169	TRUE	Empty	0.994	0.99	1	0.99	0.99	Dibutyl phthalate	INCHIKEY:DOIRQSBPFJWKBE-UHFFFAOYSA-N	C 16H 22O 4	278.2	16.13	0.0172391	9.95455	10.2792	10.0374	10.2761	9.96072	10.3275	10.0351	10.2819
170	TRUE	Empty	0.854	0.97	0.87	-	0.07	Didymocalyxin B	INCHIKEY:SYJASFPLLHXQRX-VZZMMMTHSA-N	C 28H 22O 7	470.1	5.96	6.32655e-11	6.82366	8.51993	6.81677	8.55867	6.78317	8.59587	6.80831	8.35068
171	TRUE	Empty	0.95	1	1	-	0.96	Diglycolic acid	INCHIKEY:QEVGZEDELICMKH-UHFFFAOYSA-N	C 4H 6O 5	134	9.03	1.21764e-05	10.7985	9.97005	10.7083	9.51189	10.6997	9.37069	10.7371	9.91883
172	TRUE	Empty	0.873	0.93	0.92	-	0	Dihydroisomorphine-3-glucuronide	INCHIKEY:KCPRJVDBLLJBMF-LGPQXENESA-N	C 23H 29NO 9	463.2	5.18	0.00115457	7.68134	8.24034	7.57243	7.97112	7.35481	7.91016	7.81401	7.97943
173	TRUE	Empty	0.709	0.57	0.85	-	0.74	Dihydronaringenin-O-sulphate	INCHIKEY:IKBKWHISHDVLNO-UHFFFAOYSA-N	C 15H 14O 8S	354	8.88	0.0144862	7.68233	7.90785	7.85495	8.0902	8.30376	-6.86465	7.81721	7.44503
174	TRUE	Empty	0.945	0.99	0.99	-	0.82	Dimetan	INCHIKEY:ITEQSCBLCCNACE-UHFFFAOYSA-N	C 11H 17NO 3	211.1	8.37	0.0640458	7.97801	8.43971	7.54326	8.35584	8.04282	8.19681	8.09665	8.33657
175	TRUE	Empty	0.879	0.82	0.98	-	0.86	dimethyl (E)-2-methylbut-2-enedioate	INCHIKEY:WQEXBUQDXKPVHR-SNAWJCMRSA-N	C 7H 10O 4	158.1	19.52	1.6973e-06	9.08068	9.44578	8.61792	9.40463	9.08663	9.42036	9.07261	9.43683
176	TRUE	Empty	0.936	1	0.98	-	0.97	Dimethyl 2-oxoglutarate	INCHIKEY:TXIXSLPEABAEHP-UHFFFAOYSA-N	C 7H 10O 5	174.1	8.38	2.21338e-07	10.0458	10.1567	9.76646	8.75253	9.92055	9.04784	10.1106	10.3153
177	TRUE	Empty	0.956	0.99	0.98	0.93	0.04	Dimethyl adipate	INCHIKEY:UDSFAEKRVUSQDD-UHFFFAOYSA-N	C 8H 14O 4	174.1	9.91	0.0049204	7.37822	7.5729	6.99911	7.58526	7.10459	7.47352	7.02567	7.4283
178	TRUE	Empty	0.847	0.94	0.87	-	0.48	Dioxydemeton-S-methyl	INCHIKEY:PZIRJMYRYORVIT-UHFFFAOYSA-N	C 6H 15O 5PS 2	262	9.83	0.00205278	7.78842	6.9769	7.9296	7.43378	7.86476	-6.19918	7.36084	-6.33567
179	TRUE	Empty	0.802	0.65	0.95	-	0.9	Diphenyl disulfide	INCHIKEY:GUUVPOWQJOLRAS-UHFFFAOYSA-N	C 12H 10S 2	218	8.38	0.0244644	5.86971	6.05161	8.09542	-5.7519	7.47863	-5.89894	9.19779	10.1044
180	TRUE	Empty	0.94	0.99	0.99	-	0.63	Distichonic acid B	INCHIKEY:MQDGZZFOZKWSKP-UHFFFAOYNA-N	C 10H 18N 2O 8	294.1	8.49	0.000931375	8.05514	8.0233	8.53744	7.55846	8.63107	7.69891	8.56324	8.34167
181	TRUE	Empty	0.935	0.98	0.99	-	0.01	Dolichin B	INCHIKEY:LRCYZCCKRIVTHN-CMVHYPBASA-N	C 20H 20O 5	340.1	9.33	0.00106024	-5.86306	7.20301	6.6349	7.79368	5.72084	7.26315	6.36685	7.10316
182	TRUE	Empty	0.932	0.98		-	0.32	Eicosanedioic acid	INCHIKEY:JJOJFIHJIRWASH-UHFFFAOYSA-N	C 20H 38O 4	342.3	14.29	0.000926083	6.23648	6.88395	5.97752	7.22407	6.29575	7.14178	6.5458	6.56915
183	TRUE	Empty	1	1	0.99	-	0.68	ent-Gallocatechin 4'-methyl ether	INCHIKEY:ITDYPNOEEHONAH-HIFRSBDPSA-N	C 16H 16O 7	320.1	6.51	0.00104008	8.3942	8.83699	8.23218	7.6814	8.03248	7.57158	8.52644	8.74069
184	TRUE	Empty	0.994	0.98	1	1	0.93	Epicatechin	INCHIKEY:PFTAWBLQPZVEMU-UKRRQHHQSA-N	C 15H 14O 6	290.1	7.69	0.00758314	9.57324	8.73167	9.03407	8.71565	9.04184	8.60558	9.54711	7.76834
185	TRUE	Empty	0.936	0.99	0.98	-	0.17	Epicatechin-(2beta->7,4beta->6)-catechin	INCHIKEY:BEPYKTSNKZMROV-UHFFFAOYNA-N	C 30H 24O 12	576.1	7.69	7.69359e-06	7.3736	-4.83257	6.9088	5.55839	7.05082	5.46265	7.36296	6.63164
186	TRUE	Empty	1	0.98	1	0.84	0.94	Erucamide	INCHIKEY:UAUDZVJPLUQNMU-KTKRTIGZSA-N	C 22H 43NO	337.3	19.68	0.0137441	8.76643	8.99627	8.72285	8.95764	8.754	8.8077	8.74179	8.7369
187	TRUE	Empty	0.845	0.78	0.95	-	0	Erysothiopine	INCHIKEY:HNDYDGVKLJMGCM-UHFFFAOYSA-N	C 19H 21NO 7S	407.1	6.43	0.0137158	7.52376	8.00135	7.0373	8.08992	7.44466	7.90266	5.84493	7.61648
188	TRUE	Empty	0.948	1	1	-	0.8	Erythritol bis(carbonate)	INCHIKEY:ZWGIZHOZSXFSNW-UHFFFAOYSA-N	C 6H 6O 6	174	9.6	0.0247892	9.16885	7.74349	8.59418	7.99036	8.51878	7.81624	8.89809	7.90483
189	TRUE	Empty	0.937	0.99	0.99	-	0.08	Etherolenic acid	INCHIKEY:QWRJRLCIDLDGLM-GTTHPXIQSA-N	C 18H 28O 3	292.2	8.5	2.23014e-11	8.81166	8.09562	9.10001	6.34051	9.04864	6.65816	8.77183	7.23223
190	TRUE	Empty	0.833	0.99	0.83	-	0.09	Ethyl 2-hydroxypentanoate	INCHIKEY:MQGTZMCASHTGBJ-UHFFFAOYSA-N	C 7H 14O 3	146.1	8.92	0.0184039	-5.35507	6.53795	-6.21326	7.05476	-5.86362	6.2343	-4.62603	6.3529
191	TRUE	Empty	0.786	0.73	0.89	-	0.94	Ethyl aconitate	INCHIKEY:ANIDMCPGEUWERH-PLNGDYQASA-N	C 8H 10O 6	202	8.14	3.03915e-06	9.66479	8.75974	10.1719	8.02695	10.1094	8.67033	9.59843	8.92268
192	TRUE	Empty	0.986	1	1	0.97	0.47	FA 17:0	INCHIKEY:KEMQGTRYUADPNZ-UHFFFAOYSA-N	C 17H 34O 2	270.3	11.02	0.00265924	7.8148	7.96122	7.85937	7.77674	8.08203	7.78639	7.93086	7.74901
193	TRUE	Empty	0.995	1	1	0.99	0.86	FA 18:0	INCHIKEY:QIQXTHQIDYTFRH-UHFFFAOYSA-N	C 18H 36O 2	284.3	19.97	0.0230914	7.87848	8.62448	8.87051	8.62653	7.70454	9.14122	8.78731	9.14227
194	TRUE	Empty	0.899	1	0.93	-	0.85	Formiminoglutamic acid	INCHIKEY:NRXIKWMTVXPVEF-BYPYZUCNSA-N	C 6H 10N 2O 4	174.1	7.94	0.0023347	8.32174	6.0384	8.64839	8.01114	8.49268	7.87172	8.47539	-7.64739
195	TRUE	Empty	0.837	0.84	0.91	-	0.4	Formononetin 7-(6''-methylmalonylglucoside)	INCHIKEY:DQNRUSGVMUYAHO-UHFFFAOYNA-N	C 26H 26O 12	530.1	8.76	0.0266397	7.92642	7.14126	7.99436	-6.08927	8.32346	6.21822	7.85582	6.8539
196	TRUE	Empty	0.945	1	0.99	-	0.89	formyl 2E,4Z,6Z-decatrienoate	INCHIKEY:DLNQRJFVXCCDKL-YXABPGESSA-N	C 11H 16O 2	180.1	10.55	0.0395838	9.07111	9.20003	9.13635	9.22012	9.12835	9.24301	9.13518	9.14427
197	TRUE	Empty	0.99	1	0.98	0.99	0.99	Fructose	INCHIKEY:BJHIKXHVCXFQLS-UYFOZJQFSA-N	C 6H 12O 6	180.1	8.12	0.00665098	10.6952	9.26227	10.8165	8.8194	10.7323	9.20799	10.747	-8.99824
198	TRUE	Empty	0.932	1	0.97	-	0.88	Galactose	INCHIKEY:GZCGUPFRVQAUEE-KCDKBNATSA-N	C 6H 12O 6	180.1	8.69	0.0015562	10.3767	-8.71048	10.605	-8.15439	10.5785	9.06184	10.4137	9.70417
199	TRUE	Empty	0.945	0.99	1	-	0.01	Gallocatechin 4'-methyl ether	INCHIKEY:ITDYPNOEEHONAH-DZGCQCFKSA-N	C 16H 16O 7	320.1	4.2	0.00120751	7.65062	8.54899	7.65045	7.25992	6.91493	7.65297	7.4487	8.61929
200	TRUE	Empty	0.941	0.99	0.99	-	0.06	gamma- 12(13)-EpODE	INCHIKEY:TVHXKPMFCYEQTM-YMVJEYMASA-N	C 18H 30O 3	294.2	8.91	5.35212e-07	8.60924	-7.58726	8.92756	7.97178	9.27569	7.84656	8.54375	8.01744
201	TRUE	Empty	0.735	0.72	0.82	-	0.01	gamma-L-Glutamyl-gamma-L-glutamyl-L-methionine	INCHIKEY:OGZNUDJBIAOLAA-UHFFFAOYSA-N	C 15H 25N 3O 8S	407.1	9.22	0.00015208	6.26144	7.44855	6.76998	7.41363	6.98316	7.45928	6.85648	7.42315
202	TRUE	Empty	0.791	0.77	0.88	-	0.85	Gericudranins A	INCHIKEY:NSDIRDXLZWLHAL-UHFFFAOYSA-N	C 29H 24O 9	516.1	7.96	0.00695353	6.36221	8.67036	-6.12852	7.6068	5.53692	7.54884	8.05382	9.05003
203	TRUE	Empty	0.946	1	0.99	-	0.06	Gingerglycolipid A	INCHIKEY:MPSGDHOYFIUPSO-PDBXOOCHNA-N	C 33H 56O 14	676.4	11.43	1.15172e-06	8.86427	7.74711	8.76026	7.19696	8.67329	7.06862	9.05348	7.58792
204	TRUE	Empty	0.918	1	0.95	-	0.01	Gingerglycolipid B	INCHIKEY:UHISGSDYAIIBMO-HZJYTTRNNA-N	C 33H 58O 14	678.4	11.73	5.68962e-09	8.20128	7.45849	8.23891	6.83186	8.1216	7.41136	8.26019	7.83588
205	TRUE	Empty	0.945	0.99	1	-	0.62	GlcCer(d16:2(4E,6E)/18:0(2OH))	INCHIKEY:XGTDYHSNHNKWKG-SAWQETFNSA-N	C 40H 75NO 9	713.5	17.86	1.76696e-08	6.42278	8.59696	6.43119	8.52671	6.13166	8.36289	7.12053	8.57141
206	TRUE	Empty	0.817	0.72	0.94	-	0.2	Glepidotin C	INCHIKEY:NOPHUFYTJFIALJ-UHFFFAOYSA-N	C 19H 22O 3	298.2	9.45	8.2211e-07	7.24589	7.56886	6.31708	7.50479	6.31221	7.59985	6.15944	7.4972
207	TRUE	Empty	0.948	1	1	-	0.88	Glucopyranosylmoranoline	INCHIKEY:GNVIYGFSOIHFHK-NIKVEEOSSA-N	C 12H 23NO 9	325.1	8.56	6.88194e-05	10.2914	9.72687	10.4269	8.75802	10.3127	9.14036	10.2672	9.97892
208	TRUE	Empty	0.995	1	1	0.99	0.85	Glucose 6-phosphate	INCHIKEY:NBSCHQHZLSJFNQ-DVKNGEFBSA-N	C 6H 13O 9P	260	9.21	0.024313	8.60465	8.65143	8.50615	8.20137	8.57452	8.23942	8.72167	9.00796
209	TRUE	Empty	1	1	1	-	0.98	Glucose-1,3-mannose oligosaccharide	INCHIKEY:QIGJYVCQYDKYDW-PGPOJXOFNA-N	C 12H 22O 11	342.1	9.03	0.00080653	10.1135	10.6583	10.1299	10.5488	9.86506	10.5481	10.3423	10.8441
210	TRUE	Empty	0.756	0.98	0.72	-	0.04	Glucosyl (2E,6E,10x)-10,11-dihydroxy-2,6-farnesadienoate	INCHIKEY:MSRVZJWXQUEINS-WAAHFECUSA-N	C 21H 36O 9	432.2	16.44	0.0078206	7.34548	8.44006	7.9498	8.51934	7.91758	8.60731	8.1959	8.27187
211	TRUE	Empty	0.942	0.99	0.99	-	0.83	Glucosyl (E)-2,6-Dimethyl-2,5-heptadienoate	INCHIKEY:BHPXBBXWEPCSOK-RMKNXTFCSA-N	C 15H 24O 7	316.2	10.42	0.000540701	9.14625	9.36939	9.21567	9.37107	9.24708	9.37683	9.22693	9.31999
212	TRUE	Empty	0.844	0.98	0.85	-	0.42	Glucosylisomaltol	INCHIKEY:RRYYNIJTMYUJDC-UHFFFAOYNA-N	C 12H 16O 8	288.1	9.04	2.31453e-05	6.21557	7.65539	4.79274	7.78492	-4.00776	7.57953	7.19782	7.89159
213	TRUE	Empty	0.993	1	0.98	1	0.95	Glutamic acid	INCHIKEY:WHUUTDBJXJRKMK-UHFFFAOYSA-N	C 5H 9NO 4	147.1	8.57	0.0468607	9.76801	9.81727	9.69693	9.63451	9.79795	9.64042	10.0343	9.94331
214	TRUE	Empty	0.941	0.98	0.99	0.89	0.15	Glycerol 1-myristate	INCHIKEY:DCBSHORRWZKAKO-UHFFFAOYSA-N	C 17H 34O 4	302.2	14.78	6.29985e-07	7.86328	8.17683	7.82698	8.20594	7.79671	8.21571	7.86484	8.04303
215	TRUE	Empty	0.785	0.77	0.87	-	0.9	Glycerol 1-propanoate	INCHIKEY:AALUCPRYHRPMAG-UHFFFAOYNA-N	C 6H 12O 4	148.1	19.86	7.7297e-06	9.23483	9.54779	8.86535	9.50162	9.26557	9.52089	9.25149	9.53944
216	TRUE	Empty	0.888	0.99	0.91	-	0.86	Glycerol tripropanoate	INCHIKEY:YZWRNSARCRTXDS-UHFFFAOYSA-N	C 12H 20O 6	260.1	5.85	0.0275913	9.1427	9.45427	6.98998	8.69603	9.24133	7.7276	9.28891	7.88436
217	TRUE	Empty	0.989	0.98	0.98	1	0.93	Glycerophosphocholine	INCHIKEY:SUHOQUVVVLNYQR-MRVPVSSYSA-N	C 8H 20NO 6P	257.1	8.94	6.65515e-08	7.67569	9.78029	7.84373	9.96221	7.62233	9.95071	7.73568	9.88156
218	TRUE	Empty	0.927	0.96	0.98	-	0	Helianthoside A	INCHIKEY:URWTWFXFHITMQC-UHFFFAOYNA-N	C 53H 86O 21	1058.6	8.48	2.06056e-07	6.70628	7.85298	6.49465	8.02021	6.56111	7.9197	6.47986	7.93242
219	TRUE	Empty	0.927	0.98	0.98	-	0.53	Heptadecanedioic acid	INCHIKEY:QCNWZROVPSVEJA-UHFFFAOYSA-N	C 17H 32O 4	300.2	12.68	0.00500588	6.6861	7.0097	6.59338	7.0009	6.64431	7.37369	6.66043	6.81352
220	TRUE	Empty	0.886	0.97	0.92	-	0.13	heptaprenyl diphosphate	INCHIKEY:LSJLEXWXRKTZAJ-YUIIPXGZSA-N	C 35H 60O 7P 2	654.4	12.11	6.01494e-11	8.54371	6.75732	8.52106	6.05225	8.63099	6.10248	8.70259	6.59397
221	TRUE	Empty	0.938	0.98	0.99	-	0.13	Hoduloside VIII	INCHIKEY:RDSYZBZVCGNHLV-MDWZMJQENA-N	C 46H 76O 18	916.5	6.14	3.27603e-06	6.33508	8.13196	-6.03059	7.66248	-5.47216	6.93869	6.70761	7.84744
222	TRUE	Empty	0.908	0.97	0.95	-	0.89	Hydralazine	INCHIKEY:RPTUSVTUFVMDQK-UHFFFAOYSA-N	C 8H 8N 4	160.1	19.82	2.95458e-06	9.26202	9.56292	9.09203	9.52515	9.29588	9.5384	9.29658	9.5607
223	TRUE	Empty	0.944	0.98	1	-	0.4	IC202C	INCHIKEY:RPHCJSPQKSVBSH-UHFFFAOYSA-N	C 23H 44N 6O 7	516.3	12.95	0.000226855	8.27304	7.79848	8.09337	7.61857	8.10888	7.63809	8.40984	7.85909
224	TRUE	Empty	0.883	0.83	0.99	-	0.17	Ile-Ile-Arg	INCHIKEY:KYLIZSDYWQQTFM-UHFFFAOYSA-N	C 18H 36N 6O 4	400.3	15.62	2.36887e-06	7.94864	7.66291	7.90294	7.21554	8.0302	7.33222	8.0978	7.6796
225	TRUE	Empty	0.726	0.72	0.8	-	0.44	Isosilybin	INCHIKEY:FDQAOULAVFHKBX-UHFFFAOYNA-N	C 25H 22O 10	482.1	8.81	0.0133738	7.52958	7.61554	7.82635	6.78259	8.13364	-5.92165	7.6573	-5.97325
226	TRUE	Empty	0.942	1	0.99	-	0	Isosyringinoside	INCHIKEY:RYVGCUJETSKZDU-ARJAWSKDNA-N	C 23H 34O 14	534.2	6.35	7.89908e-08	7.06896	8.29863	7.092	8.23655	6.427	8.11586	6.83463	7.92943
227	TRUE	Empty	0.938	0.98	0.99	-	0.2	Jascaric acid	INCHIKEY:DQGMPXYVZZCNDQ-KDQYYBQISA-N	C 18H 30O 2	278.2	8.78	7.7077e-11	9.22015	8.0571	9.01957	7.48935	9.14341	7.43661	9.11397	7.76764
228	TRUE	Empty	1	0.99	1	-	0.78	Juglone glucoside	INCHIKEY:AAYYJBZZHJNMEO-UHFFFAOYNA-N	C 16H 16O 8	336.1	2.16	1.29144e-06	8.13225	10.0149	8.90981	9.71252	8.50575	9.56211	8.87216	10.1881
229	TRUE	Empty	0.884	1	0.9	-	0.08	Kaempferol 3-(3''-sulfatoglucoside)	INCHIKEY:OSLUOTYHBWLMHD-LQGJBJRRSA-N	C 21H 20O 14S	528.1	5.68	1.02517e-06	7.65201	6.60964	7.70912	5.48983	7.64467	5.60695	7.679	6.60966
230	TRUE	Empty	0.832	0.98	0.83	-	0.4	Kiwiionoside	INCHIKEY:SGUOENJPMRQEMJ-AATRIKPKNA-N	C 19H 34O 9	406.2	5.93	0.0377848	7.24221	-6.00354	7.53411	6.63056	7.40933	6.56689	7.47644	-6.13477
231	TRUE	Empty	0.853	0.98	0.86	-	0.66	L-2-Amino-5-hydroxypentanoic acid	INCHIKEY:CZWARROQQFCFJB-UHFFFAOYNA-N	C 5H 11NO 3	133.1	8.77	0.0110665	7.28947	7.09028	7.5891	7.43847	7.56532	7.60353	6.83134	7.74533
232	TRUE	Empty	0.939	0.99	0.99	-	0.98	L-3-Cyanoalanine	INCHIKEY:BXRLWGXPSRYJDZ-YEQUQEJONA-N	C 4H 6N 2O 2	114	8.95	0.00671749	8.82412	9.297	9.05354	9.20864	9.23289	9.12411	8.88084	9.10217
233	TRUE	Empty	0.942	1	0.97	0.9	0.87	L-Targinine	INCHIKEY:NTNWOCRCBQPEKQ-YFKPBYRVSA-N	C 7H 16N 4O 2	188.1	2.83	0.00698032	7.85513	8.52992	8.40898	8.82696	8.36535	8.42727	7.60122	7.41825
234	TRUE	Empty	0.949	1	1	-	0.97	L-Xylonate	INCHIKEY:QXKAIJAYHKCRRA-WCPAMKQWNA-N	C 5H 10O 6	166	8.18	1.35802e-09	9.54491	8.82709	9.67875	8.50314	9.74603	8.5899	9.83185	9.08265
235	TRUE	Empty	0.945	1	0.99	-	0.97	L-xylono-1,4-lactone	INCHIKEY:CUOKHACJLGPRHD-NUNKFHFFSA-N	C 5H 8O 5	148	8.72	1.30274e-12	9.12312	8.10985	9.36863	8.14386	9.3711	7.87053	9.35616	8.00614
236	TRUE	Empty	0.973	1	1	0.95	0.96	lauric acid	INCHIKEY:POULHZVOKOAJMA-UHFFFAOYSA-N	C 12H 24O 2	200.2	8.39	1.42171e-08	8.2838	9.48144	8.34277	9.49089	8.37734	9.52133	8.34939	9.4609
237	TRUE	Empty	0.97	0.98	0.97	0.97	0.19	Lauroyl diethanolamide	INCHIKEY:AOMUHOFOVNGZAN-UHFFFAOYSA-N	C 16H 33NO 3	287.2	11.81	0.0340015	8.14769	7.83164	8.10628	7.87152	7.97882	8.01728	7.75667	7.71831
238	TRUE	Empty	0.946	1	1	-	0.05	Linalool oxide D 3-[apiosyl-(1->6)-glucoside]	INCHIKEY:AINNVCLTLJOODL-UHFFFAOYNA-N	C 21H 36O 11	464.2	6.7	6.29785e-06	7.63577	8.38281	7.716	8.56705	7.64204	8.33223	7.58853	8.12029
239	TRUE	Empty	0.943	0.99	1	-	0.3	Linalyl propionate	INCHIKEY:WAQIIHCCEMGYKP-UHFFFAOYNA-N	C 13H 22O 2	210.2	11.11	0.000640963	7.22498	7.21062	6.83056	7.30183	6.85108	7.66395	6.98919	7.01596
240	TRUE	Empty	0.997	1	1	1	0.51	Linoleic acid	INCHIKEY:OYHQOLUKZRVURQ-HZJYTTRNSA-N	C 18H 32O 2	280.2	10.28	2.25264e-12	10.0508	9.54602	10.2299	9.00308	10.1721	9.14696	10.0752	9.56299
241	TRUE	Empty	0.967	1	0.99	0.94	0.1	Linolenic acid	INCHIKEY:DTOSIQBPPRVQHS-PDBXOOCHSA-N	C 18H 30O 2	278.2	15.16	0.0478581	-8.21022	7.49653	-7.56066	7.07931	8.19402	6.90802	8.40156	7.4528
242	TRUE	Empty	0.946	1	1	-	0.13	LPA(0:0/18:2(9Z,12Z))	INCHIKEY:PALVOIADDFXQGT-KKFOGOCZSA-N	C 21H 39O 7P	434.2	9.36	3.82595e-06	8.29992	8.00736	8.3377	7.81724	8.11296	7.61932	8.34582	7.69939
243	TRUE	Empty	0.877	0.81	0.98	-	0.75	Luteolin 7-lactate	INCHIKEY:RWLCWWWLTRAVKI-UHFFFAOYSA-N	C 18H 14O 8	358.1	7.84	0.000475892	5.48041	8.34353	-5.82655	8.02248	6.86376	-7.04845	6.75265	7.9032
244	TRUE	Empty	0.989	1	1	0.98	0.38	lysoPC 18:2	INCHIKEY:AXFAVZQXPFQIEI-IXPSVHCVNA-N	C 26H 50NO 7P	519.3	11.99	5.62596e-10	7.40999	9.30439	7.61055	9.01218	7.96431	9.19474	7.75968	9.58517
245	TRUE	Empty	0.996	1	1	0.99	0.33	LysoPC(16:0)	INCHIKEY:ASWBNKHCZGQVJV-HSZRJFAPSA-N	C 24H 50NO 7P	495.3	12.37	8.4363e-06	7.36887	8.70702	7.41163	8.37412	7.74939	8.65606	7.81359	8.79911
246	TRUE	Empty	1	1	1	-	0.66	Maltulose	INCHIKEY:PLAWHUTVTLGRHT-UHFFFAOYSA-N	C 24H 44O 22	684.2	9.03	3.48419e-06	8.43513	9.44205	7.91511	9.55936	7.46791	9.50911	8.94481	9.73957
247	TRUE	Empty	0.936	0.99	0.97	0.9	0.01	Matairesinol	INCHIKEY:MATGKVZWFZHCLI-LSDHHAIUSA-N	C 20H 22O 6	358.1	9.33	0.00214491	6.17936	8.13052	7.9316	7.88902	6.38591	8.07671	6.48242	8.32143
248	TRUE	Empty	0.948	1	1	-	0.36	Matteucinol 7-O-glucoside	INCHIKEY:HPXOUFFMSLZOLE-UJHARDEVSA-N	C 24H 28O 10	476.2	5.69	7.43159e-06	8.0347	8.34735	8.08495	8.19934	7.95353	8.52677	8.13627	8.41443
249	TRUE	Empty	0.944	1	0.99	-	0.01	Mayolene-18	INCHIKEY:RFJCITQJURPJMT-INOIBKDBSA-N	C 36H 64O 4	560.5	10.33	3.74922e-13	8.31066	7.02373	8.59829	4.99966	8.52854	5.68823	8.40578	6.8812
250	TRUE	Empty	0.857	0.85	0.94	-	0.92	Methyl-3-ethyl-butanoate	INCHIKEY:LBUDVZDSWKZABS-UHFFFAOYSA-M	C 7H 13O 2	129.1	10.15	1.38335e-05	8.6322	7.6011	8.89533	7.5215	9.02935	7.3607	8.70369	7.31558
251	TRUE	Empty	0.931	1	0.97	-	0.58	Methylmalonate	INCHIKEY:ZIYVHBGGAOATLY-UHFFFAOYSA-N	C 4H 6O 4	118	8.58	0.00240167	8.65103	8.09496	8.23354	7.99741	8.39004	7.15278	8.4649	8.19738
252	TRUE	Empty	1	0.99	1	-	0.85	MG(0:0/18:0/0:0)	INCHIKEY:YQEMORVAKMFKLG-UHFFFAOYSA-N	C 21H 42O 4	358.3	17.76	0.000720015	9.25093	9.53303	9.26065	9.51075	9.28567	9.36638	9.32738	9.39682
253	TRUE	Empty	0.937	0.97	0.99	-	0.38	MG(18:0/0:0/0:0)	INCHIKEY:VBICKXHEKHSIBG-FQEVSTJZSA-N	C 21H 42O 4	358.3	16.3	0.000127867	7.70867	7.94216	7.69905	8.04364	7.795	8.05155	7.84586	7.9824
254	TRUE	Empty	0.928	0.97	0.98	-	0.19	MG(20:2(11Z,14Z)/0:0/0:0)	INCHIKEY:QRBGFYBOCBYOSN-KDTZXJSHSA-N	C 23H 42O 4	382.3	15.69	0.000439561	7.87889	7.74767	7.87319	7.45752	7.95955	7.46975	8.06273	7.78846
255	TRUE	Empty	0.867	0.81	0.97	-	0.61	MG(20:3(5Z,8Z,11Z)/0:0/0:0)	INCHIKEY:NXOGCYSVLAIYAP-UXNAVHBBSA-N	C 23H 40O 4	380.3	17.76	3.80754e-06	7.10406	7.6716	7.14205	7.75132	7.23832	7.52642	7.31629	7.53627
256	TRUE	Empty	0.805	1	0.78	-	0.44	Moniliformin	INCHIKEY:KGPQKNJSZNXOPV-UHFFFAOYSA-N	C 4H 2O 3	98	8.97	0.00909816	6.98404	7.91409	7.07633	7.92075	7.51475	7.93108	7.34989	7.84743
257	TRUE	Empty	0.958	0.98	0.99	0.93	0.54	Monoelaidin	INCHIKEY:RZRNAYUHWVFMIP-MDZDMXLPSA-N	C 21H 40O 4	356.3	16.49	0.00106964	8.54475	7.86657	9.08441	8.14039	9.07301	7.77823	8.4591	8.30273
258	TRUE	Empty	0.973	0.99	1	0.95	0.51	Monolinolenin (9c,12c,15c)	INCHIKEY:GGJRAQULURVTAJ-PDBXOOCHSA-N	C 21H 36O 4	352.3	15.14	7.13927e-11	9.30283	8.54759	9.24855	8.26591	9.12647	8.18886	9.35285	8.44778
259	TRUE	Empty	0.734	0.66	0.84	-	0.06	Myricetin 3-(4''-galloylrhamnoside)	INCHIKEY:SOXQRBCUPOQXQV-SMFRJKGVSA-N	C 28H 24O 16	616.1	6.32	0.000255522	7.47938	-5.54397	7.2029	-4.99658	6.17069	5.038	7.50716	-5.99812
260	TRUE	Empty	0.995	0.99	0.99	1	0.92	Myristic acid	INCHIKEY:TUNFSRHWOTWDNC-UHFFFAOYSA-N	C 14H 28O 2	228.2	9.45	8.27349e-07	8.2961	8.71526	8.35643	8.76689	8.34043	8.77701	8.3019	8.48929
261	TRUE	Empty	0.932	0.97	0.99	-	0.35	N-.alpha.-(tert-Butoxycarbonyl)-L-histidine	INCHIKEY:AYMLQYFMYHISQO-QMMMGPOBSA-N	C 11H 17N 3O 4	255.1	8.06	0.000124887	-6.2048	7.8832	5.84408	6.53358	7.56706	6.5732	7.85841	8.24083
262	TRUE	Empty	1	0.99	0.99	-	0.72	N-(1-Deoxy-1-fructosyl)glycine	INCHIKEY:UKKRCTOBKMVJGX-GCPSPYDWNA-N	C 8H 15NO 7	237.1	8.03	0.373691	8.42658	7.80658	8.35586	7.58972	8.1311	8.00752	8.27451	8.16169
263	TRUE	Empty	0.724	0.63	0.85	-	0.62	N-(4-Hydroxycinnamoyl)tyrosine	INCHIKEY:LEEDEKWKJVUWGA-BJMVGYQFNA-N	C 18H 17NO 5	327.1	8.55	0.042649	9.75164	9.05323	9.51563	8.51185	9.33813	8.85331	9.84911	9.23623
264	TRUE	Empty	0.81	0.95	0.82	-	0.13	N-[[[4-[[5-(Dimethylamino)-1-oxopentyl]amino]phenyl]amino]thioxomethyl]-4-(1,1-dimethylethyl)benzamide	INCHIKEY:BVJSXSQRIUSRCO-UHFFFAOYSA-N	C 25H 34N 4O 2S	454.2	17.05	7.98896e-06	8.21789	8.57121	8.37556	8.66837	8.33037	8.59438	8.45044	8.47683
265	TRUE	Empty	0.942	0.99	0.99	-	0.01	N-Acetylamphetamine	INCHIKEY:YPKBVWZHVTZSPU-UHFFFAOYSA-N	C 11H 15NO	177.1	7.06	9.36546e-05	7.0959	7.83373	5.94405	7.60576	-6.20932	7.75719	6.22853	7.77928
266	TRUE	Empty	0.861	0.93	0.9	-	0.96	N-Acetylhistidine	INCHIKEY:KBOJOGQFRVVWBH-UHFFFAOYSA-N	C 8H 11N 3O 3	197.1	8.67	0.0725338	7.82469	8.013	8.51659	8.53385	8.20871	8.51347	7.31256	8.21912
267	TRUE	Empty	0.734	0.97	0.69	-	0	N-Desmethylvinblastine	INCHIKEY:OBEIXXHHUOSBLA-UQUCNHJPSA-N	C 45H 56N 4O 9	796.4	9.2	0.0226783	7.6563	8.47634	7.46361	8.43493	7.73435	8.43351	7.98602	8.49866
268	TRUE	Empty	0.765	1	0.72	-	0.85	n-heptanoyl acetic acid	INCHIKEY:SHDOPXQMNJDYDK-UHFFFAOYSA-N	C 9H 16O 3	172.1	14.86	0.0410991	8.57378	-8.11505	8.41784	8.97128	8.20575	8.98083	8.24686	8.68977
269	TRUE	Empty	0.789	0.86	0.83	-	0.25	N-Nitrosopiperidine	INCHIKEY:UWSDONTXWQOZFN-UHFFFAOYSA-N	C 5H 10N 2O	114.1	9.31	0.03691	6.54667	6.37629	6.78587	6.85749	6.53153	7.11413	5.39878	6.42335
270	TRUE	Empty	0.893	0.99	0.92	-	0.29	N-Nonanoylglycine	INCHIKEY:JXDFEUKNHBHUCP-UHFFFAOYSA-N	C 11H 21NO 3	215.2	9.41	0.000436105	7.02839	7.23674	7.12974	7.3397	7.11617	7.37123	7.11796	7.18961
271	TRUE	Empty	0.981	0.98	0.99	0.98	0.32	N-Oleoylethanolamine	INCHIKEY:BOWVQLFMWHZBEF-KTKRTIGZSA-N	C 20H 39NO 2	325.3	15.71	5.43831e-09	8.16184	6.75516	8.26426	5.1703	8.24966	5.02537	8.37261	-5.08515
272	TRUE	Empty	1	1	1	-	0.26	Naringenin 7-(2-p-Coumaroylglucoside)	INCHIKEY:GWQICLAGXZQERP-OQMWYOKPSA-N	C 30H 28O 12	580.2	6.59	0.000445686	8.78568	7.17037	8.53596	7.67824	8.39331	7.79704	8.72589	6.21999
273	TRUE	Empty	0.992	1	1	0.99	0.11	NCGC00168946-02!5-hydroxy-2-(4-methoxyphenyl)-3-[(2S,3R,4S,5S,6R)-3,4,5-trihydroxy-6-(hydroxymethyl)oxan-2-yl]oxy-7-[(2S,3R,4R,5R,6S)-3,4,5-trihydroxy-6-methyloxan-2-yl]oxychromen-4-one	INCHIKEY:OFKKUHQXUNAUKP-FYVHZATOSA-N	C 28H 32O 15	608.2	7.18	5.21768e-08	8.44449	5.64343	8.37017	6.11883	8.51151	6.57069	8.39175	-5.82943
274	TRUE	Empty	0.975	0.99	0.95	0.98	0.08	NCGC00168949-02!(2R,3R,4S,5S,6R)-2-[[7-hydroxy-1-(4-hydroxy-3,5-dimethoxyphenyl)-3-(hydroxymethyl)-6,8-dimethoxy-1,2,3,4-tetrahydronaphthalen-2-yl]methoxy]-6-(hydroxymethyl)oxane-3,4,5-triol	INCHIKEY:PQQRNPDHSJDAGV-OVYNBQGTSA-N	C 28H 38O 13	582.2	2.34	0.0405273	7.93377	8.00622	7.76549	-5.95722	7.87863	-5.59994	8.01626	-5.11735
275	TRUE	Empty	0.967	0.99	1	0.94	0.26	NCGC00169491-02!(4S)-4-hydroxy-3,5,5-trimethyl-4-[(E)-3-[(2R,3R,4S,5S,6R)-3,4,5-trihydroxy-6-(hydroxymethyl)oxan-2-yl]oxybut-1-enyl]cyclohex-2-en-1-one	INCHIKEY:SWYRVCGNMNAFEK-CLCVOTHJSA-N	C 19H 30O 8	386.2	6.2	4.44089e-14	8.09506	6.23679	8.17336	6.66881	8.2782	6.44496	8.26065	6.31094
276	TRUE	Empty	0.944	1	1	0.89	0.77	NCGC00180160-02!2-(3,4-dimethoxyphenoxy)-6-[(3,4,5-trihydroxyoxan-2-yl)oxymethyl]oxane-3,4,5-triol	INCHIKEY:BUKNGVJDVSRYIT-UHFFFAOYSA-N	C 19H 28O 12	448.2	5.95	7.19089e-06	8.71234	9.82724	8.43684	9.545	8.04308	9.1793	8.43964	9.37128
277	TRUE	Empty	0.964	1	1	0.93	0.13	NCGC00180666-02!(2R,3S,4S,5R,6S)-2-[(3,4,5-trihydroxyoxan-2-yl)oxymethyl]-6-(3,4,5-trimethoxyphenoxy)oxane-3,4,5-triol	INCHIKEY:GGIDHIBVLYVTAU-QGPLIYBISA-N	C 20H 30O 13	478.2	6.18	2.06311e-10	8.40987	9.17304	8.42075	9.2205	8.32687	9.29917	8.48667	9.13147
278	TRUE	Empty	0.973	0.99	0.98	0.96	0.05	NCGC00180782-02!5,7-dihydroxy-2-(4-hydroxyphenyl)-6-[3,4,5-trihydroxy-6-(hydroxymethyl)oxan-2-yl]chromen-4-one	INCHIKEY:MYXNWGACZJSMBT-UHFFFAOYSA-N	C 21H 20O 10	432.1	5.51	0.000232502	8.2821	7.91194	8.10878	7.02369	8.28847	7.02221	8.26474	7.88547
279	TRUE	Empty	1	0.98	1	0.89	0.94	NCGC00180823-02!(3R,4R,5R)-5-[(E)-3-(3,4-dihydroxyphenyl)prop-2-enoyl]oxy-3,4-dihydroxycyclohexene-1-carboxylic acid	INCHIKEY:QMPHZIPNNJOWQI-GDDAOPKQSA-N	C 16H 16O 8	336.1	3.26	2.44862e-06	8.48062	9.35368	8.31705	9.34944	7.95261	9.2706	8.24966	9.713
280	TRUE	Empty	0.802	0.78	0.76	0.84	0.71	NCGC00385363-01!(3-hydroxyphenyl)-(2,4,6-trihydroxyphenyl)methanone	INCHIKEY:QWRYPHZJTWQLFX-UHFFFAOYSA-N	C 13H 10O 5	246.1	8.21	0.00533133	7.90828	8.56307	8.06555	8.65795	7.99938	8.64824	7.87517	8.51117
281	TRUE	Empty	0.968	1	0.97	0.96	0.7	NEPSILON,NEPSILON,NEPSILON-TRIMETHYLLYSINE	INCHIKEY:MXNRLFUSFKVQSK-UHFFFAOYSA-N	C 9H 20N 2O 2	188.2	2.06	0.000274132	7.64472	8.1147	7.98767	8.3891	7.82913	8.23466	7.5424	7.79007
282	TRUE	Empty	0.932	0.99	0.98	-	0.52	Norecasantalic acid	INCHIKEY:LDSSHHGVKDZTIX-UHFFFAOYNA-N	C 11H 16O 2	180.1	6.02	0.00082984	7.71352	7.91189	7.83255	7.96223	7.80362	-6.81967	7.75087	7.88081
283	TRUE	Empty	0.935	1	0.98	-	0.79	Norfuraneol	INCHIKEY:DLVYTANECMRFGX-UHFFFAOYSA-N	C 5H 6O 3	114	8.6	0.000332041	9.06067	7.91753	9.06431	6.12742	9.15552	7.66003	9.32359	8.51149
284	TRUE	Empty	0.999	1	1	1	0.96	Norleucine	INCHIKEY:LRQKBLKVPFOOQJ-YFKPBYRVSA-N	C 6H 13NO 2	131.1	7.26	0.00168168	9.77936	9.16735	9.98262	9.16621	10.0329	8.9627	9.89366	9.28116
285	TRUE	Empty	0.994	1	1	0.99	0.49	Oleic acid	INCHIKEY:ZQPPMHVWECSIRJ-KTKRTIGZSA-N	C 18H 34O 2	282.3	10.87	2.42772e-12	9.62477	8.81068	9.6863	8.43239	9.71645	8.38679	9.67174	8.48487
286	TRUE	Empty	0.945	1	0.99	-	0.33	Oleoside dimethyl ester	INCHIKEY:KYVUMEGNMQDSHO-YWEYNIOJNA-N	C 18H 26O 11	418.1	5.8	2.76747e-10	-4.87536	8.69656	-5.68293	8.39627	-5.05524	8.15267	-5.64968	8.24268
287	TRUE	Empty	0.915	0.99	0.95	-	0.06	Oleyl acetate	INCHIKEY:GYGAZRPDUOHMAF-ZHACJKMWSA-N	C 20H 38O 2	310.3	11.99	0.00190462	7.37812	6.29819	7.15048	6.14103	7.47576	6.03961	7.52199	6.82524
288	TRUE	Empty	0.721	0.96	0.68	-	0.06	Onchidal	INCHIKEY:BEKQPDFPPJFVJP-IOHUWZPGSA-N	C 17H 24O 3	276.2	14.68	0.0296131	6.72626	7.14992	6.16297	7.15479	6.61673	7.05968	6.60692	7.00942
289	TRUE	Empty	0.795	0.6	0.97	-	0	Orcein	INCHIKEY:VPEASJIRGSVXBF-UHFFFAOYSA-N	C 28H 24N 2O 7	500.2	6.18	3.93137e-10	6.86275	7.99361	7.0621	8.07483	6.91786	8.18615	6.9244	7.96019
290	TRUE	Empty	0.75	1	1	0.5	0.8	Ornithine	INCHIKEY:AHLPHDHHMVZTML-BYPYZUCNSA-N	C 5H 12N 2O 2	132.1	9.31	0.0464348	9.21144	8.98843	9.62921	9.10215	9.54102	9.08893	8.98809	8.96369
291	TRUE	Empty	0.829	0.91	0.86	-	0.01	PA 30:7	INCHIKEY:VANBSYOLHRQLRZ-HFRVSZAJNA-N	C 33H 51O 8P	606.3	8.92	0.0206211	7.9603	7.62565	8.15293	7.82291	8.16114	7.49495	8.0285	8.05209
292	TRUE	Empty	0.929	1	0.97	-	0.72	PA(18:2(9Z,12Z)/0:0)	INCHIKEY:ZQTAMPRZFOOEEP-KKFOGOCZSA-N	C 21H 39O 7P	434.2	5.84	0.000142195	8.17971	7.74509	8.1921	7.71391	8.04287	7.60645	8.3537	7.27241
293	TRUE	Empty	0.933	1	0.98	-	0.26	Patulin	INCHIKEY:ZRWPUFFVAOMMNM-UHFFFAOYNA-N	C 7H 6O 4	154	6.31	0.00110305	8.19486	7.13114	7.83838	7.25726	7.56271	6.63417	7.97957	6.73396
294	TRUE	Empty	0.824	0.63	1	-	0.42	PC(19:3(10Z,13Z,16Z)/0:0)	INCHIKEY:YWILQZMMAROEQS-MQIAJVHNSA-N	C 27H 50NO 7P	531.3	12.48	1.2613e-08	9.01177	8.22759	8.76016	8.06361	8.84146	7.89058	9.14919	8.29744
295	TRUE	Empty	0.856	0.72	1	-	0.07	PE-NMe(O-16:0/O-16:0)	INCHIKEY:DLUZETFTJHYZNV-KXQOOQHDSA-N	C 38H 80NO 6P	677.6	16.29	0.00278409	7.29835	7.70822	7.41338	7.69207	7.34257	7.8728	7.40513	7.57508
296	TRUE	Empty	0.995	0.99	0.99	1	0.72	Pentadecylic acid	INCHIKEY:WQEPLUUGTLDZJY-UHFFFAOYSA-N	C 15H 30O 2	242.2	9.94	0.0370519	8.30694	8.23854	8.16665	8.01963	8.25177	8.07487	8.25299	8.10079
297	TRUE	Empty	0.931	0.97	0.99	-	0.33	Perilloside A	INCHIKEY:YUTAFQVKXLDYFG-UHFFFAOYNA-N	C 16H 26O 6	314.2	12.54	0.00042399	8.36694	8.5412	8.41768	8.70105	8.41393	8.68249	8.40896	8.4173
298	TRUE	Empty	0.992	1	0.98	1	0.91	Phenylalanine	INCHIKEY:COLNVLDHVKWLRT-UHFFFAOYSA-N	C 9H 11NO 2	165.1	6.9	2.9715e-05	9.50738	7.84999	9.54633	8.40165	9.75569	8.19297	9.61118	8.55826
299	TRUE	Empty	0.952	1	0.99	0.91	0.83	Pheophorbide a	INCHIKEY:NSFSLUUZQIAOOX-QEWKCGBTSA-N	C 35H 36N 4O 5	592.3	12.13	7.96994e-10	9.20362	6.96045	9.71473	6.7261	9.29836	-5.82914	9.44227	-5.64112
300	TRUE	Empty	0.877	0.82	0.98	-	0.3	PI 42:7	INCHIKEY:OQVHMSJESJFKSW-VOZRZZGBNA-N	C 51H 85O 13P	936.6	18.03	7.93778e-06	7.80695	7.53561	7.99025	7.31473	7.93654	6.7507	8.19959	7.29643
301	TRUE	Empty	0.912	0.92	0.98	-	0.92	PI(O-18:0/0:0)	INCHIKEY:BDLQBUDICUCZRI-RDGQAVELSA-N	C 27H 55O 11P	586.3	16.47	1.59706e-12	9.51076	7.94907	9.10117	7.85695	8.21518	7.67334	8.79082	7.58176
302	TRUE	Empty	0.811	0.59	1	-	0.01	PI(P-16:0/0:0)	INCHIKEY:MTLRNAKDFBBVEQ-BEURSELSSA-N	C 25H 49O 11P	556.3	10.29	2.24853e-12	8.45652	6.42505	8.68527	5.73668	8.86157	4.98218	8.53425	5.50088
303	TRUE	Empty	0.903	0.98	0.94	-	0.67	Picrocrocin	INCHIKEY:WMHJCSAICLADIN-VKSCUUAMSA-N	C 16H 26O 7	330.2	6.83	0.0163077	8.13117	-7.62515	7.09105	7.88127	8.33297	-6.2183	8.17828	6.36223
304	TRUE	Empty	0.944	1	0.99	-	0.93	Pimelylcarnitine	INCHIKEY:AUWRHMAICBSXMC-NSHDSACASA-N	C 14H 25NO 6	303.2	11.24	0.000214037	8.87731	9.1164	8.9197	9.15621	8.95744	9.14446	9.00247	9.04739
305	TRUE	Empty	0.886	0.99	0.91	-	0	Piperitol	INCHIKEY:HPOHAUWWDDPHRS-UHFFFAOYNA-N	C 10H 18O	154.1	11.4	0.0458558	6.73511	7.31421	6.60064	7.03665	6.57212	6.96007	6.8658	6.80202
306	TRUE	Empty	0.867	0.79	0.98	-	0.6	Piperochromenoic acid	INCHIKEY:MSDAWPKHHPLFBC-RQZCQDPDSA-N	C 22H 28O 3	340.2	10.5	0.00317107	8.41264	8.436	8.22663	8.37869	8.15013	8.42875	8.17831	8.38629
307	TRUE	Empty	0.961	1	1	0.92	0.73	Polyphyllin B	INCHIKEY:OZIHYFWYFUSXIS-XQRFCUECSA-N	C 51H 82O 20	1014.5	11.62	4.0524e-07	9.06746	8.47941	9.34356	8.31672	9.36217	8.15459	9.25167	8.18877
308	TRUE	Empty	0.983	1	1	0.97	0.75	Procyanidin B2	INCHIKEY:XFZJEEAOWLFHDH-NFJBMHMQSA-N	C 30H 26O 12	578.1	6.38	0.0124816	9.7386	8.74061	9.45564	8.90398	9.51562	8.89915	9.69731	8.9656
309	TRUE	Empty	0.993	1	1	0.99	0.91	Proline	INCHIKEY:ONIBWKKTOPOVIA-BYPYZUCNSA-N	C 5H 9NO 2	115.1	8	6.63483e-05	9.47119	8.63746	9.74253	8.74956	9.85574	8.83015	9.47409	8.61054
310	TRUE	Empty	1	1	1	0.94	0.36	Prosapogenin A	INCHIKEY:HDXIQHTUNGFJIC-FOAHKCLGSA-N	C 39H 62O 12	722.4	12.37	0.003559	6.96004	8.01548	7.43206	7.96668	8.15969	8.46975	7.56262	8.05956
311	TRUE	Empty	0.944	1	0.99	-	0.1	Prupaside	INCHIKEY:GLRJVMYTCIKGGK-UHFFFAOYNA-N	C 27H 36O 12	552.2	7.77	1.45192e-05	7.22549	7.46288	6.91756	7.89405	6.65104	7.99206	6.98966	7.22422
312	TRUE	Empty	0.911	0.99	0.95	-	0.03	Pseudoprotogracillin	INCHIKEY:NRLDFEXARSJLFF-DHCZVXRMSA-N	C 52H 86O 22	1062.6	9.15	1.30546e-06	6.17015	7.68674	6.01398	7.91062	6.67271	7.77022	6.34141	7.8613
313	TRUE	Empty	0.947	0.99	1	-	0.31	Pterosupin	INCHIKEY:PXLWOFBAEVGBOA-UHFFFAOYSA-N	C 21H 24O 10	436.1	7.91	5.06399e-05	-5.18676	8.26342	-5.20693	8.41915	-6.49364	6.81635	6.80792	8.65794
314	TRUE	Empty	0.9	0.99	0.93	-	0.89	Pyrazinamide	INCHIKEY:IPEHBUMCGVEMRF-UHFFFAOYSA-N	C 5H 5N 3O	123	19.99	1.71085e-06	9.18395	9.52567	9.04657	9.50644	9.12132	9.51534	9.22255	9.52715
315	TRUE	Empty	0.834	0.86	0.9	-	0.04	PyroGlu-Ser-Arg	INCHIKEY:WRHLUOQLHYDXFI-UHFFFAOYSA-N	C 14H 24N 6O 6	372.2	8.59	0.0314977	6.06468	6.60489	-6.45293	6.81584	6.3457	-5.82687	-5.12043	6.82817
316	TRUE	Empty	0.948	1	1	-	0.56	Quercetin 3-methyl ether 7-rhamnoside-3'-xyloside	INCHIKEY:CIAVRKZNFRMUNY-KSRGDVLXSA-N	C 27H 30O 15	594.2	4.18	5.05675e-06	9.13273	7.98679	9.1516	7.65061	9.2589	7.98254	9.24554	5.88089
317	TRUE	Empty	0.878	0.95	0.92	-	0.23	Quinupristin	INCHIKEY:WTHRRGMBUAHGNI-MJWHERSYSA-N	C 53H 67N 9O 10S	1021.5	11.75	0.000258797	6.91334	5.3822	7.07092	5.32378	7.39868	-5.79664	7.02788	-4.83847
318	TRUE	Empty	0.988	1	1	0.98	0.95	Raffinose	INCHIKEY:MUPFEKGTMRGPLJ-BQCSWRFHSA-N	C 18H 32O 16	504.2	9.89	0.00358853	7.66322	9.35322	7.46002	9.41754	7.76765	9.72288	8.89199	9.47085
319	TRUE	Empty	0.943	1	0.99	-	0.69	Retrocalamin	INCHIKEY:HMNKPIJMXBZMJF-IAXGIENSNA-N	C 24H 30O 9	462.2	8.77	0.00915831	9.04349	8.85812	9.24653	8.96253	9.04532	8.94328	9.15779	8.88932
320	TRUE	Empty	0.88	0.94	0.92	-	0.4	rhodexin A	INCHIKEY:HFMLTKBZNAPPNY-CEKKCSHUSA-N	C 29H 44O 9	536.3	12.5	6.0241e-06	8.01474	7.02262	7.7506	5.761	7.82512	-6.31295	8.13497	7.02199
321	TRUE	Empty	0.946	0.99	1	-	0	Rhodinyl isovalerate	INCHIKEY:OZAWINZSOFVOBJ-UHFFFAOYSA-N	C 15H 28O 2	240.2	9.49	1.05101e-11	8.00852	7.04109	7.97192	6.4093	7.99736	5.6233	7.97411	6.82877
322	TRUE	Empty	0.948	1	1	-	0.52	Robinetinidol-4alpha-ol	INCHIKEY:OIDNVHGBTSUBEW-VHDGCEQUSA-N	C 15H 14O 7	306.1	6.36	3.55578e-06	8.8216	7.70997	8.50988	7.81175	8.36963	7.59441	8.69588	7.43722
323	TRUE	Empty	0.949	1	1	-	0.77	Ryanodine	INCHIKEY:JJSYXNQGLHBRRK-YSOSZROBSA-N	C 25H 35NO 9	493.2	9.49	2.96878e-09	8.28274	9.14869	8.37477	9.12627	8.38003	9.2195	8.34302	9.02835
324	TRUE	Empty	0.952	0.98	0.97	0.93	0.53	Salicin	INCHIKEY:NGFMICBWJRZIBI-SYLRKERUSA-N	C 13H 18O 7	286.1	6.33	0.00530276	7.52722	8.0068	6.89301	7.97342	6.27862	6.17919	7.4283	7.66823
325	TRUE	Empty	0.885	0.98	0.91	-	0.05	Secasterone	INCHIKEY:WDGGOKUICSKRHH-UHFFFAOYNA-N	C 28H 46O 4	446.3	19.8	0.0169726	7.75371	8.59638	7.77373	8.49143	7.80315	8.45718	7.69279	8.45354
326	TRUE	Empty	0.875	1	0.89	-	0.39	Serinyl-Valine	INCHIKEY:ILVGMCVCQBJPSH-UHFFFAOYSA-N	C 8H 16N 2O 4	204.1	8.63	0.000255611	6.70412	10.2527	5.83281	10.205	6.77749	7.70837	6.66242	7.75672
327	TRUE	Empty	0.992	1	0.99	0.99	0.33	Sorbitan palmitate	INCHIKEY:IYFATESGLOUGBX-UHFFFAOYSA-N	C 22H 42O 6	402.3	17.75	1.32951e-05	6.70792	7.74839	-6.12468	7.79732	6.82616	7.76767	7.05169	7.65926
328	TRUE	Empty	0.942	1	0.99	-	0.08	Spongioside A	INCHIKEY:CMVKGKGHOKTWFO-OGUOSZSFSA-N	C 51H 86O 21	1034.6	8.81	0.000228069	6.78808	7.85525	7.02258	7.75682	-5.3898	7.51005	6.73785	7.75681
329	TRUE	Empty	0.946	1	1	-	0.1	SQDG 34:3	INCHIKEY:LNRVRCHULFFBFY-IBGNPXJHSA-N	C 43H 76O 12S	816.5	13.97	3.16047e-12	8.17974	6.87436	8.05406	6.60554	8.15392	-4.73981	8.30474	5.90621
330	TRUE	Empty	0.949	1	1	-	0.84	Symmetric dimethylarginine	INCHIKEY:HVPFXCBJHIIJGS-LURJTMIESA-N	C 8H 18N 4O 2	202.1	15.15	0.0467143	7.97065	8.12046	8.359	8.59855	8.67041	7.1219	8.20784	7.0913
331	TRUE	Empty	0.933	0.99	0.98	-	0.59	Todatriol glucoside	INCHIKEY:OFPQILBGSKDVRR-UHFFFAOYNA-N	C 17H 26O 10	390.2	6.37	0.013555	7.64785	8.11597	6.19102	7.70639	6.09337	6.65884	7.65085	6.95802
332	TRUE	Empty	0.946	1	1	-	0.57	TR-Saponin A	INCHIKEY:VXQCKKNUNHNYPF-KBZHBASMNA-N	C 52H 78O 20	1022.5	11.79	0.0471806	8.02997	7.89271	8.21617	7.934	8.28292	8.03782	8.17807	7.69607
333	TRUE	Empty	0.95	1	1	-	0.02	Tracheloside	INCHIKEY:LWYAMIUSVGPFKS-UHFFFAOYNA-N	C 27H 34O 12	550.2	7.97	0.0109783	7.8138	7.79834	7.69012	8.00308	7.63566	7.98379	7.70742	7.45865
334	TRUE	Empty	0.975	1	0.99	0.95	0.53	trans-3,5-Dimethoxy-4-hydroxycinnamaldehyde	INCHIKEY:CDICDSOGTRCHMG-ONEGZZNKSA-N	C 11H 12O 4	208.1	7.8	6.48745e-10	6.67708	8.08732	6.58414	8.076	6.04354	8.22176	6.97754	8.06503
335	TRUE	Empty	0.94	0.99	0.99	-	0	trans-Grandmarin isovalerate	INCHIKEY:KULKFALUVSLOHX-UHFFFAOYNA-N	C 20H 24O 7	376.2	8.01	0.00150045	6.18077	7.1994	6.88597	7.73854	6.01831	7.51867	6.03732	7.30078
336	TRUE	Empty	0.966	0.99	0.98	0.95	0.05	Triacetin	INCHIKEY:URAYPUMNDPQOKB-UHFFFAOYSA-N	C 9H 14O 6	218.1	8.72	0.0307683	7.45979	7.74544	7.21672	7.72234	7.4736	7.61752	7.30089	7.60157
337	TRUE	Empty	0.936	1	0.98	-	0.53	Tricholomic acid	INCHIKEY:NTHMUJMQOXQYBR-UHFFFAOYSA-N	C 5H 8N 2O 4	160	8.97	0.000141053	8.2847	8.44568	8.04822	8.51473	8.13994	8.46769	7.1066	7.91416
338	TRUE	Empty	0.883	0.97	0.91	-	0.01	Tricosanedioic acid	INCHIKEY:QJXPRGZXRIIGOP-UHFFFAOYSA-N	C 23H 44O 4	384.3	16.43	7.65286e-06	7.62493	6.58621	7.98995	6.78194	7.72286	7.01724	7.89334	5.38864
339	TRUE	Empty	0.947	1	1	-	0.01	Trigofoenoside A	INCHIKEY:KNZSXKKCTOYLSV-UHFFFAOYSA-N	C 45H 74O 18	902.5	8.49	1.60789e-09	7.15427	8.24776	6.8987	8.36871	6.96646	8.29161	6.75516	8.40429
340	TRUE	Empty	0.988	1	0.99	0.98	0.92	Tryptophan	INCHIKEY:QIVBCDIJIAJPQS-UHFFFAOYSA-N	C 11H 12N 2O 2	204.1	5.21	0.000333407	8.55218	9.10299	8.80174	9.35746	8.79917	9.09451	8.7262	8.92386
341	TRUE	Empty	0.902	1	0.93	-	0.01	Tuberoside B (Allium tuberosum)	INCHIKEY:ZGGKEHAJPIMSQR-UHFFFAOYNA-N	C 51H 84O 22	1048.5	8.41	5.31109e-05	6.08225	7.33245	5.94642	7.43911	6.65313	7.40516	6.13137	7.45401
342	TRUE	Empty	0.987	1	0.98	0.99	0.75	Uridine	INCHIKEY:DRTQHJPVMGBUCF-AYZDMWBASA-N	C 9H 12N 2O 6	244.1	6.28	3.92726e-07	9.11901	7.62141	9.25569	6.99271	9.22596	6.65245	9.15542	6.8509
343	TRUE	Empty	0.937	1	0.98	-	0.58	Viscumiside A	INCHIKEY:KZQCCKUDYVSOLC-UHFFFAOYSA-N	C 22H 24O 11	464.1	8.43	4.28625e-06	7.9634	7.55215	-6.2374	7.54661	-4.59043	7.88814	7.19278	8.435
344	TRUE	Empty	0.872	1	0.88	-	0.92	Vulgarole	INCHIKEY:QRRSWTCVSAQEPQ-UHFFFAOYNA-N	C 12H 20O 3	212.1	13.78	0.000121779	7.9646	8.33564	7.99585	8.4545	7.95813	8.44666	7.97592	8.37565
345	TRUE	Empty	0.793	0.86	0.83	-	0.79	Yuccaol C	INCHIKEY:UMQRRGZFEXVPFD-NSCUHMNNSA-N	C 30H 22O 10	542.1	9.94	0.000436794	8.25788	9.50651	8.32942	9.4738	8.32877	9.06646	8.87331	9.44117
