# Supplementary material
Source: publisher figshare collection journal article supplement (https://tandf.figshare.com/articles/dataset/_/9798299)
Supplement: Supplementary file 3 [file 1 › Table S3 - Copy.xlsx]

## Sheet: Table S3.
Table S3. PIE analysis of metabolites produced in the leaves under control leaf (CL), saline leaf (NL), silicon leaf (SiL) and salinity with silicon leaf (NSiL) treatments.
6 elements included exclusively in "NL":	5 common elements in "NL" and "SiL":	19 elements included exclusively in "SiL":	4 common elements in "CL" and "NL":	20 common elements in "CL", "NL" and "SiL":	651 common elements in "CL", "NL", "SiL" and "NSiL":	18 common elements in "NL", "SiL" and "NSiL":	7 common elements in "SiL" and "NSiL":	10 elements included exclusively in "CL":	17 common elements in "CL" and "SiL":	18 common elements in "CL", "SiL" and "NSiL":	4 common elements in "CL" and "NSiL":	16 common elements in "CL", "NL" and "NSiL":	29 common elements in "NL" and "NSiL":	12 elements included exclusively in "NSiL":
Polypropylene glycol (m w 1,200-3,000)	Soyasaponin aa	(6RS)-22-oxo-23,24,25,26,27-pentanorvitamin D3 6,19-sulfur dioxide adduct / (6RS)-22-oxo-23,24,25,26,27-pentanorcholecalciferol 6,19-sulfur dioxide adduct	3,5,7-Trimethyl-2E,4E,6E,8E-decatetraene	Cluster of 9-HOTE	Diglycolic acid	Isosorbide Mononitrate	Cluster of Substance P (9-11)	Decamethylcyclopentasiloxane	Nitrofurantoin	N-(2,5-Dihydroxyphenyl)pyridinium(1+)	Diethyl phthalate	Pymetrozin	3-(4-Hydroxy-3-methoxyphenyl)-2-methylpropionic acid	3,4-Methylenedioxybenzoic acid
N'-((8-Hydroxy-2-quinolinyl)methylene)-3-phenylpropanohydrazide	Lusianin	(25R)-1beta,3alpha,7alpha-trihydroxy-5beta-cholestan-27-oyl taurine	Cluster of Carboxy-ibuprofen	3-hydroxymethyl-glutaric acid	Fructose	2-Phenylethyl beta-D-glucopyranoside	3-Hydroxy-1-phenyl-1-heptadecanone	Ethyl 3-O-beta-D-glucopyranosyl-butanoate	7-hydroxymethotrexate	Pyrrolidino-[1,2E]-4H-2,4-dimethyl-1,3,5-dithiazine	Galiposin	3,7-Dimethyl-5-octene-1,7-diol 1-glucoside	6-Succinoaminopurine	Imidazolelactic acid
Lorazepam	beta-Ionone	Salicylic acid	PS(18:2(9Z,12Z)/0:0)	Dihydro-2,4-dimethyl-6-(1-methylpropyl)-4H-1,3,5-dithiazine	NCGC00384606-01![4-acetyloxy-2,5-dihydroxy-6-(hydroxymethyl)oxan-3-yl] (E)-3-(4-hydroxyphenyl)prop-2-enoate	Quercetin 3-(2-galloylglucoside)	Hesperetin 5,7-O-diglucuronide	N-Methylnicotinic acid cation	Starch acetate	2,4,6-Triethyl-1,3,5-oxadithiane	Isolimocitrol 3-glucoside	trans-p-Menthane-7,8-diol 8-glucoside	N-Acetyl-6-O-L-fucosyl-D-glucosamine	Cluster of Emamectin B1a
Cluster of Phosphatidylethanolamine lyso 18:2	6'-Sialyllactose	CDP-ribitol	1-Methoxy-1-(2,4,5-trimethoxyphenyl)-2-propanol	L-Lyxonate	Cluster of Dehydropachyrrhizone	3-[(2E)-2-(Nitromethylidene)hydrazinyl]benzoic acid	lysoPC 18:3	Neotrehalose	URIDINE 5'-DIPHOSPHOGALACTOSE	1',2'-Dihydro-1,1'-dimethyl-2'-oxo-4,4'-bipyridinium(1+)	(-)-1-Methylpropyl 1-propenyl disulfide	L-gamma-glutamyl-L-leucine	1,N2-propanodeoxyguanosine	Cluster of Hovenidulcioside B1
Cluster of 14,15-LTA4	PIP(16:1(9Z)/18:1(11Z))	Anofinic acid		Phytosphingosine	Cluster of Citrulline	cis-4-Carboxymethylenebut-2-en-4-olide	5-Hydroxy-7-methoxyflavanone	Ustiloxin D	N-arachidonoyl alanine	L-Glutamic acid, dimethyl ester		Hirsutin	Methyl 7-epi-12-hydroxyjasmonate glucoside	PE(22:6(4Z,7Z,10Z,13Z,16Z,19Z)/0:0)
trans-1,2-dimethylcyclohexane		Cluster of PI(18:0/16:2(9Z,12Z))		Ethyl propyl disulfide	Galactose	Glucoraphanin	3-Methyl-3-hydroxypentanedioate	Dihydro-4,6-dimethyl-2-(2-methylpropyl)-4H-1,3,5-dithiazine	4-Methyloctyl acetate	Anthenoside A		Queuine	2-Hydroxynevirapine	3-Hydroxy-4,6-heptadiyne-1-yl 1-glucoside
		Alliosterol 1-rhamnoside 16-galactoside		NCGC00380872-01!(2R,3S)-2-[(3,4-dihydroxyphenyl)methyl]-2-hydroxy-3-[(E)-3-(3-hydroxy-4-methoxyphenyl)prop-2-enoyl]oxybutanedioic acid	Glucopyranosylmoranoline	2-O-Acetyl-trans-coutaric acid	Myricetin 3-(2''-galloylglucoside)	Chlorogenoquinone	Isosyringinoside	PA 32:10		7'-hydroxyabscisic acid	Butyl salicylate	Methyl 4-methoxycinnamate
		Quercetin 3-(2'',3'',4''-triacetylgalactoside)		(+/-)-N,N-Dimethyl menthyl succinamide	Cluster of (R)-2-ethylmalic acid	N6-Carbamoyl-L-threonyladenosine		N-stearoyl valine	4,5-Dihydro-1-benzoxepin-3(2H)-one	Vanilloloside		Arginine	(-)-erythro-Anethole glycol 2-glucoside	PA 42:6
		PSF-A		Hydroxyprolyl-Histidine	Catechin	Hexacosanedioic acid		Argininosuccinic acid	N-Benzoylaspartic acid	Cluster of Medicarpin 3-O-(6'-malonylglucoside)		Paxilline	2-O-alpha-D-Galactopyranosyl-1-deoxynojirimycin	Pongamoside A
		Epicatechin 3-glucoside		(1R*,2R*,4R*,8S*)-p-Menthane-1,2,8,9-tetrol 9-glucoside	Glucose-1,3-mannose oligosaccharide	N-Succinyl-2-amino-6-ketopimelate		Arginyl-Asparagine	Etaspirene	1H-Pyrrole-3-propanoic acid, 5-[(1,2-dihydro-2-oxo-3H-indol-3-ylidene)methyl]-2,4-dimethyl-		Methyl 2,4,6-trihydroxybenzoate	4-Deacetylneosolaniol	Rifapentine
		4-Hydroxybenzyl isothiocyanate rhamnoside		Chromium(III) acetate	Cluster of Adenine	5,7-Dihydroxy-3,6,8,2',4',5'-hexamethoxyflavone			1-Palmitoyl-2-hydroxy-sn-glycero-3-phospho-(1'-rac-glycerol)	Licoricesaponin C2		Muramic acid	N2-Galacturonyl-L-lysine	(3S,6S)-3-Hydroxy-1,7-dioxaspiro[5.5]undecane
		9-Hydroxy-4-methoxypsoralen		17-(Allylamino)-17-demethoxygeldanamycin	Cluster of Linoleic acid	Epitheaflavic acid 3'-gallate			Salvianolic acid L	11:0(10Me,10Me)		(3R)-3,4-Dihydroxy-3-(hydroxymethyl)butanenitrile 4-glucoside	8-Oxoguanine	Cluster of Drotaverine
		(5S,6R)-2'-Deoxyuridine glycol		Benzyl gentiobioside	Cluster of 7E,9Z,12Z-octadecatrienoic acid	Sulfoxone			Cluster of L-galactono-1,4-lactone	Pubescenol		Cluster of 9-(beta-D-Ribofuranosyl)zeatin	Citrulline
		Methylene thiocyanate		MLS001097641-01!	Dimethyl 2-oxoglutarate	LysoPC(18:1(9Z))			a-L-Arabinofuranosyl-(1->3)-b-D-xylopyranosyl-(1->4)-D-xylose	13S-HOME(11E)		2,3-Diaminosalicylic acid	Decoyinine
		Pinnatifinoside A		Taurolithocholate sulfate	Cluster of 5-Butyltetrahydro-2-oxo-3-furancarboxylic acid	Selenium hexasulfide			Cluster of Isosorbide Mononitrate	PI(17:2(9Z,12Z)/0:0)		Octanoylglucuronide	Valine
		(Dimethoxymethyl)benzene		Austalide C	Cluster of (Z)-13-Oxo-9-octadecenoic acid	Cluster of Subaphylline			Licorice glycoside D1	4,2',3',4'-Tetrahydroxychalcone 4'-O-(6''-O-p-coumaroyl)glucoside		5-Hydroxy-7,2',4'-trimethoxy-3',6'-diketoflavone	S-Glutaryldihydrolipoamide
		formyl 2Z,4E,6Z-decatrienoate		SORBATE	D-(-)-Fructose	Nuatigenin 3-[rhamnosyl-(1->2)-glucoside]			Viscutin 1	Villinol			Cluster of 5-Hexyltetrahydro-2-oxo-3-furancarboxylic acid
		Dicyclohexyl disulfide		OCTOPAMINE	Cluster of 3-O-Caffeoylshikimic acid	Subaphylline				Cluster of 2-Hexylbenzothiazole			Secoeremopetasitolide A
		epi-4'-hydroxyjasmonic acid		Pulchellidin 3-glucoside	Dibutyl phthalate								Boviquinone 4
				Avocadene 1-acetate	Cluster of (S)-malyl alpha-D-glucosaminide								Asperphenamate analogoue with additional glycine
					Cluster of 5-Oxoprolinate								Cluster of Ciglitazone
					Cluster of Norleucine								4-Nitrobenzoic acid
					Cluster of Glutamic acid								Vitexin 7-O-sulfate
					N-(4-Hydroxycinnamoyl)tyrosine								Leucyl-Threonine
					Procyanidin B2								Benzenamine, 5-(1,1-dimethylethyl)-4-methoxy-2-methyl-3-nitro-
					Cluster of D-Aspartic acid								Cluster of Coronene
					1-Palmitoylglycerol								glycerol 2-phosphate
					2,2-Dihydroperoxypropane								Phe-Asp-Lys
					Ethyl aconitate								Cluster of Hydroxylated N-acetyl desmethyl frovatriptan
					Cluster of Oleic acid
					Cluster of 3-Methylglutaconic acid
					2-Keto-3-deoxyoctonic acid
					Epicatechin
					nicotiflorin
					L-Xylonate
					4-Methylbenzotriazole
					Cluster of ADENOSINE
					PI(O-18:0/0:0)
					Cluster of Phenylalanine
					Cluster of 6-Feruloylglucose 2,3,4-trihydroxy-3-methylbutylglycoside
					Allithiamine
					Cluster of Proline
					trans-4-Carboxymethylenebut-2-en-4-olide
					Butyl isopropyl disulfide
					4-Hydroxy-Benzotriazol
					Cluster of 2-Linoleoylglycerol
					4'-Methylisoscutellarein 8-(2''-sulfoglucoside)
					Cluster of Monolinolenin (9c,12c,15c)
					6S-methyl-octanoic acid
					9,12,13-TriHOME(10)
					Hydralazine
					MG(0:0/18:0/0:0)
					1,8-Octanedithiol
					Glycerol 1-propanoate
					Cluster of 5-Hydroxy-6,7,8,4'-tetramethoxyflavanone
					Arginyl-Phenylalanine
					Cluster of Jascaric acid
					Ornithine
					Diisopropylethylamine
					(9R,13R)-10-oxo-11-phytoenoic acid
					Pheophorbide a
					Cluster of 1,4-Ipomeadiol
					Pyrazinamide
					5-Acetylamino-6-formylamino-3-methyluracil
					Erythritol bis(carbonate)
					3,5,7-Trihydroxyflavone 3-glucoside-8-sulfate
					Benzoylmalic acid
					Cluster of Isovalerylglucuronide
					Cluster of Asparaginyl-Histidine
					Glucosyl (E)-2,6-Dimethyl-2,5-heptadienoate
					Glycerol tripropanoate
					Cluster of Demissine
					ADENOSINE
					Methylthiomethyl 2-methylbutanethiolate
					Quercetin 3-methyl ether 7-rhamnoside-3'-xyloside
					6-Feruloylglucose 2,3,4-trihydroxy-3-methylbutylglycoside
					Cluster of Safflomin A
					L-xylono-1,4-lactone
					2-Keto-6-acetamidocaproate
					Cluster of Uridine
					Cluster of 9-HPODE
					Chicoric acid
					Cluster of 3-[(2E)-2-(Nitromethylidene)hydrazinyl]benzoic acid
					dimethyl (E)-2-methylbut-2-enedioate
					Cluster of 10R-HODE
					formyl 2E,4Z,6Z-decatrienoate
					Cluster of Polyphyllin B
					Norfuraneol
					Retrocalamin
					(Z)-Tamarindienal
					NCGC00169650-03!5,7-dihydroxy-2-(4-hydroxyphenyl)-8-[3,4,5-trihydroxy-6-(hydroxymethyl)oxan-2-yl]-6-(3,4,5-trihydroxyoxan-2-yl)chromen-4-one
					Cluster of Raffinose
					Phenylalanine
					Cluster of PC(19:3(10Z,13Z,16Z)/0:0)
					D-Glucoheptose
					5,9-octadecadiynoic acid
					Cluster of Valine
					Cluster of 1,5-Dibutyl methyl hydroxycitrate
					Acetylisoniazid
					Benzyl O-[arabinofuranosyl-(1->6)-glucoside]
					Cluster of 4,4'-Thiodiphenol
					beta-Methylamino-L-alanine
					Cluster of Pseudoecgonine
					Cluster of 3,7-Dihydroxy-2-[4-hydroxy-3-(4-hydroxy-3-methylbutyl)phenyl]-5,6-dimethoxy-4H-1-benzopyran-4-one
					hydroxyl diethyl succinate
					Cluster of D-Tryptophan
					Cluster of 6-Hydroxyluteolin 6,4'-dimethyl ether 7-rutinoside
					(9R,10S,12Z)-9,10-Dihydroxy-8-oxo-12-octadecenoic acid
					alpha,alpha'-diethyl-4,4'-bis(2-propynyloxy)stilbene
					Vanillic acid
					Pimelylcarnitine
					1-O-(8R-hydroxy-8-methyl-3Z,9-decadienoyl)-beta-D-glucopyranose
					Gingerglycolipid A
					D-Gluconic acid Mn(II) salt
					Cluster of Citrusin C
					Glycolaldehyde dimer,mixture of stereoisomers
					Cluster of Myo-inositol-6-phosphate
					Dihydrouracil
					Robinetinidol-4alpha-ol
					9S-hydroxy-10S,11S-epoxy-12Z,15Z-octadecadienoic acid
					Cluster of Etherolenic acid
					Didymocalyxin B
					Ethyl beta-D-glucopyranoside
					Naringenin 7-(2-p-Coumaroylglucoside)
					3-Hydroxy-2H-pyran-2-one
					8E-Tetradecenyl acetate
					Cluster of 8-Hydroxyadenine
					3-Phenylpropyl glucosinolate
					7S,8S-DiHOME(9Z)
					Erucamide
					2-Methylpropyl hexanoate
					Quinic acid
					1-Isothiocyanato-7-(methylthio)heptane
					Linoleic acid
					Phlorisobutyrophenone 2-glucoside
					Cluster of 13-oxo-octadecanoic acid
					NCGC00385204-01!5-hydroxy-2-[2-hydroxy-3-[(2S,3R,4S,5S,6R)-3,4,5-trihydroxy-6-(hydroxymethyl)oxan-2-yl]oxyphenyl]-7,8-dimethoxychromen-4-one
					2,4-octadecadienoic acid
					De-O-methylsimmondsin
					1,2,3,4-Tetra-O-acetyl-.beta.-D-glucopyranose
					Cluster of N-methyl-2-oxoglutaramic acid
					Cluster of NCGC00180160-02!2-(3,4-dimethoxyphenoxy)-6-[(3,4,5-trihydroxyoxan-2-yl)oxymethyl]oxane-3,4,5-triol
					Cluster of Methionine sulfoxide
					Beta-D-ribopyranose
					Sakuranetin
					2-Isopropyl-1,4-benzenediol
					Cluster of Palmitoyl glucuronide
					(R)-lipoic acid
					Kaempferide
					Methylmalonate
					Cluster of Isoferulic acid 3-O-glucuronide
					Methyl-3-ethyl-butanoate
					Myristic acid
					Cluster of gamma- 12(13)-EpODE
					Glucose 6-phosphate
					NCGC00180397-02!4-(2,4-dihydroxy-3,5-dimethylbenzoyl)oxy-2-hydroxy-3,5-dimethylbenzoic acid
					Cluster of Rhamnazin 3-rutinoside
					Ascorbyl stearate
					n-heptanoyl acetic acid
					3-oxopimelic acid
					Cytarabine
					6-Epi-7-isocucurbic acid glucoside
					Cluster of Tryptophan
					Monoelaidin
					NCGC00180206-02!5-hydroxy-7-[3,4,5-trihydroxy-6-(hydroxymethyl)oxan-2-yl]oxy-2-[4-(3,4,5-trihydroxy-6-methyloxan-2-yl)oxyphenyl]chromen-4-one
					heptaprenyl diphosphate
					16-hydroxy-9E-hexadecenoic acid
					Cinmethylin
					2,2,4-Trimethyl-1,3-pentadienol diisobutyrate
					Cluster of Squamolone
					Danazol
					Cluster of 2-Dodecylbenzenesulfonic acid
					Apigenin 8-C-[xylosyl-(1->2)-galactoside]
					Coumaric acid
					5-Acetyl-2-hydroxybenzoic acid
					Cluster of NCGC00180823-02!(3R,4R,5R)-5-[(E)-3-(3,4-dihydroxyphenyl)prop-2-enoyl]oxy-3,4-dihydroxycyclohexene-1-carboxylic acid
					3-O-alpha-L-rhamnopyranosyl-3-hydroxydecanoic acid
					Epimesquitol-4alpha-ol
					Sulfaphenazole
					Cluster of Anandamide (18:2, n-6)
					MLS000563045-01!
					Gentisic acid
					Allixin
					Cluster of PI(P-16:0/0:0)
					Cluster of D-erythro-L-galacto-Nonulose
					9'-Carboxy-gamma-chromanol
					NCGC00168946-02!5-hydroxy-2-(4-methoxyphenyl)-3-[(2S,3R,4S,5S,6R)-3,4,5-trihydroxy-6-(hydroxymethyl)oxan-2-yl]oxy-7-[(2S,3R,4R,5R,6S)-3,4,5-trihydroxy-6-methyloxan-2-yl]oxychromen-4-one
					3-Methyl-3H-imidazo[4,5-f]quinoxalin-2-amine
					Maltulose
					methyl 10,12,13,16-bisepidioxy-9-hydroperoxy-14-octadecenoate
					Cluster of N-(1-Deoxy-1-fructosyl)glycine
					14alpha-Hydroxy-4beta-deoxypaxilline
					Cluster of Procyanidin B2
					MLS000563514-01!2-hydroxy-4-(2-hydroxy-4-methoxy-3,6-dimethylbenzoyl)oxy-3,6-dimethylbenzoic acid
					Cluster of Piperochromenoic acid
					NCGC00180666-02!(2R,3S,4S,5R,6S)-2-[(3,4,5-trihydroxyoxan-2-yl)oxymethyl]-6-(3,4,5-trimethoxyphenoxy)oxane-3,4,5-triol
					PI(20:4(5Z,8Z,11Z,14Z)/0:0)
					Ombuin
					1-hydroxy-5-phenyl-3-pentanone
					Cluster of (2R)-1-O-beta-D-Galactopyranosylglycerol
					ent-Gallocatechin 4'-methyl ether
					Cluster of 12,13-DiHODE
					Cluster of 3-Methyl sulfolene
					5-Ethyl-3-methyl-2E,4E,6E-nonatriene
					Cluster of Guanosine
					Cluster of Porric acid B
					Rutarin
					Perilloside A
					16E-octadecenoic acid
					Cluster of Okanin 4'-alpha-L-arabinofuranosyl-(1->4)-glucoside
					Cluster of 6,10,14-Trimethyl-5,9,13-pentadecatrien-2-one
					Quercetin 3,4'-dimethyl ether
					Formiminoglutamic acid
					Conferone
					Chelidonic acid
					Pregnenolone sulfate
					Cluster of Leu-Gly
					Avocadene 2-acetate
					D-Glucaro-1,4-lactone
					Mayolene-18
					1-(sn-Glycero-3-phospho)-1D-myo-inositol
					Cluster of dimethadione
					Pentadecylic acid
					PA(16:0/0:0)
					dehydro-D-arabinono-1,4-lactone
					Cluster of LPA(0:0/18:2(9Z,12Z))
					Cuelure
					10-oxo-nonadecanoic acid
					Tricholomic acid
					lauric acid
					Cluster of Ryanodine
					NCGC00180782-02!5,7-dihydroxy-2-(4-hydroxyphenyl)-6-[3,4,5-trihydroxy-6-(hydroxymethyl)oxan-2-yl]chromen-4-one
					4'-Hydroxy-5,5'-diisopropyl-2,2'-dimethyl-3,4-biphenylquinone
					1,7-Dimethylguanosine
					Cluster of IC202C
					Retinyl beta-glucuronide
					D-glycero-L-galacto-Octulose
					Cluster of Yuccaol C
					Caffeic acid
					5-Deoxyribose-1-phosphate
					2,3-Diketo-L-gulonate
					5S,15S-diHPETE
					Glu-Leu
					(9Z)-(7S,8S)-Dihydroxyoctadecenoic acid
					Ceriporic acid C
					N-[[[4-[[5-(Dimethylamino)-1-oxopentyl]amino]phenyl]amino]thioxomethyl]-4-(1,1-dimethylethyl)benzamide
					Hydroxysepiapterin
					5,6,7,3',4',5'-Hexamethoxyflavanone
					12(13)Ep-9-KODE
					Dibutyl malate
					3-Hydroxy-8,9-dimethoxycoumestan
					4-O-alpha-D-Glucopyranuronosyl-D-galactose
					Gingerglycolipid B
					Orinapterin
					Patulin
					3,3',5-Trihydroxy-4'-methoxy-6,7-methylenedioxyflavone 3-glucuronide
					Leu-Pro
					Cluster of SQDG 34:3
					PA(18:2(9Z,12Z)/0:0)
					Monolinolenin (9c,12c,15c)
					2,3-Methyleneglutaric acid
					Genistein 8-C-glucoside
					N-Oleoylethanolamine
					D-1-[(3-Carboxypropyl)amino]-1-deoxyfructose
					Lauroyl diethanolamide
					Enantiomultijugin
					NCGC00385208-01!(2R,3R)-2-(2,6-dihydroxyphenyl)-3,5,7-trihydroxy-2,3-dihydrochromen-4-one
					Methyl 2,3,6-tri-O-galloyl-beta-D-glucopyranoside
					Cluster of Juglone glucoside
					Picrocrocin
					Cluster of (2E)-hexenedioylcarnitine
					10-Hydroxy-3,7-dimethyl-2E,6E-decadienoic acid
					Deoxyadenosine
					Astragalin
					Decarbamoylgonyautoxin III
					alpha-Hydroxymetoprolol
					Sesamol
					Leucyl-Aspartate
					(2E)-hexenedioylcarnitine
					2-Ethylglutaric acid
					(x)-1,2-Propanediol 1-O-b-D-glucopyranoside
					5-O-beta-D-Xylopyranosyl-L-arabinose
					1-(3-Hydroxy-4-methoxyphenyl)-1,2-ethanediol
					Cluster of NCGC00169491-02!(4S)-4-hydroxy-3,5,5-trimethyl-4-[(E)-3-[(2R,3R,4S,5S,6R)-3,4,5-trihydroxy-6-(hydroxymethyl)oxan-2-yl]oxybut-1-enyl]cyclohex-2-en-1-one
					3-(2-Methylpropyl)pyridine
					Kaempferol 3-beta-(6''-sulfatoglucoside)
					DL-Norepinephrine
					Cluster of Carthamidin
					5,8-Dimethoxychalepensin
					Calystegin A3
					N-Methylcalystegine B2
					Stearyl citrate
					beta-(2-Methoxyphenoxy)-lactic acid
					Malvidin 3-sophoroside-5-glucoside
					Aspartyl-Aspartate
					13-KODE
					Glu-Ala
					Cluster of Distichonic acid B
					Cluster of Pantothenamide
					Cluster of (R)-14-Methyloxacyclotetradecan-2-one
					Lumazine
					Hydroxytyrosol
					Cysteineglutathione disulfide
					3,9-Dimethyluric acid
					Matteucinol 7-O-glucoside
					TR-Saponin A
					3-Methyl-5-pentyl-2-furanundecanoic acid
					10-Hydroxyloganin
					Dihydrolipoate
					Caryatin
					rhodexin A
					Rhodinyl isovalerate
					Calcitroic acid
					Methylsyringin
					Cluster of Dimetan
					cis-3-Hexenyl b-primeveroside
					Quercetin 3-glucoside-3'-sulfate
					Mucic acid
					Vulgarole
					Viscumiside A
					Fagopyritol A1
					Uranium pentafluoride
					24-Nor-5beta-chol-22-ene-3alpha,7beta-diol
					PA 30:7
					2-Hydroxy-4-imino-2,5-cyclohexadienone
					(15a,20R)-Dihydroxypregn-4-en-3-one 20-[glucosyl-(1->4)-6-acetyl-glucoside]
					Ile-Ile-Arg
					LysoPE(0:0/20:0)
					Cluster of (20S)-1alpha,20,25-trihydroxy-24-norvitamin D3/(20S)-1alpha,20,25-trihydroxy-24-norcholecalciferol
					13-HODE
					MLS001333175-01!5-hydroxy-2-(3-hydroxy-4-methoxyphenyl)-7-[3,4,5-trihydroxy-6-[(3,4,5-trihydroxy-6-methyloxan-2-yl)oxymethyl]oxan-2-yl]oxychromen-4-one
					NCGC00168949-02!(2R,3R,4S,5S,6R)-2-[[7-hydroxy-1-(4-hydroxy-3,5-dimethoxyphenyl)-3-(hydroxymethyl)-6,8-dimethoxy-1,2,3,4-tetrahydronaphthalen-2-yl]methoxy]-6-(hydroxymethyl)oxane-3,4,5-triol
					Formononetin 7-(6''-methylmalonylglucoside)
					Cluster of Melongoside H
					(1R,2R,4S,6R)-2,6-Fenchanediol 2-O-b-D-glucoside
					Guanosine
					Cyanidin 3-O-(coumaroylglucoside)
					Veronicafolin 3-glucosyl-(1->3)-galactoside
					NCGC00385363-01!(3-hydroxyphenyl)-(2,4,6-trihydroxyphenyl)methanone
					Kaempferol 3-(6G-malonylneohesperidoside)
					NCGC00384922-01!(2R,3R,4S,5S,6R)-2-octoxy-6-[[(2S,3R,4S,5R)-3,4,5-trihydroxyoxan-2-yl]oxymethyl]oxane-3,4,5-triol
					2-Octenoylcarnitine
					5,7,3',4',5'-Pentahydroxy-3,6,8-trimethoxyflavone
					NCGC00347381-02!(3S,5S,8R,9S,10S,13R,14S,17R)-5,14-dihydroxy-13-methyl-17-(6-oxopyran-3-yl)-3-[(2R,3R,4S,5S,6R)-3,4,5-trihydroxy-6-(hydroxymethyl)oxan-2-yl]oxy-2,3,4,6,7,8,9,11,12,15,16,17-dodecahydro-1H-cyclopenta[a]phenanthrene-10-carbaldehyde
					MG(20:2(11Z,14Z)/0:0/0:0)
					FA 18:0
					Aspartyl-Glutamine
					(+)-15S-hydroxy-hexadecanoic acid
					Eriodictyol 7,3'-dimethyl ether 4'-prenyl ether
					Asterlingulatoside D
					(5E,10E)-19-fluoro-1alpha-hydroxyvitamin-D3 / (5E,10E)-19-fluoro-1alpha-hydroxycholecalciferol
					Isomugineic acid
					Glycerol 1-myristate
					3Z-nonenal
					L-Targinine
					Bis(2-furanylmethyl) sulfide
					Cluster of C17 Sphingosine
					9-hexadecenal
					Naringenin 5,7-dimethyl ether 4'-O-xylosyl-(1->4)-arabinoside
					6-Oxa-3,9-dithiaundecane-1,11-diol
					Cluster of N-Acetylhistidine
					Ethyl (S)-3-hydroxybutyrate glucoside
					Cinnamtannin A2
					Robinin
					4-Hydroxy-5-(3',4'-dihydroxyphenyl)-valeric acid-O-methyl-O-glucuronide
					FA 17:0
					Tracheloside
					Cluster of 5-ethyl-5-methyl-2,4-oxazolidinedione
					3Z,6Z,9Z-Octadecatrienyl acetate
					PI 42:7
					Anandamide (18:3, n-3)
					2,3-Dihydro-5-methyl-1H-pyrrolizine-7-carboxaldehyde
					Dioxydemeton-S-methyl
					Cluster of 3'-O-Methyl-(-)-epicatechin-5-O-sulphate
					Cluster of 2-Hydroxy-4-methylbenzaldehyde
					Chinenoside I
					Secasterone
					Lys-Leu
					(S,Z)-Lyratol acetate
					Hydroxytyrosol 1-O-glucoside
					3,4-Furandicarboxylic acid
					6,10,14-octadecatrienoic acid
					10-hydroxy-16-oxo-hexadecanoic acid
					16:1(10Z)(15Me)
					2-Isopropyl-5-methoxypyrazine
					MG(0:0/20:3(11Z,14Z,17Z)/0:0)
					DG(20:5(5Z,8Z,11Z,14Z,17Z)/0:0/20:5(5Z,8Z,11Z,14Z,17Z)) (d5)
					Methyldalbergin
					Norecasantalic acid
					16-methyl-6Z,9Z,12Z-heptadecatrienoic acid
					Cluster of 5,7-Icosanedione
					2beta,7alpha,12alpha-Trihydroxy-3-oxo-5beta-cholan-24-oic Acid
					Leucyl-Arginine
					1-Propenyl 1-(1-propenylthio)propyl disulfide
					MG(18:0/0:0/0:0)
					3,5-Dicaffeoyl-4-succinoylquinic acid
					Cluster of 3',5'-cyclic dAMP
					1-Acetoxy-2-hydroxy-5,12,15-heneicosatrien-4-one
					Dihydronaringenin-O-sulphate
					5'-Methylthioadenosine
					(7'R,8'R)-4,7'-Epoxy-3',5-dimethoxy-4',9,9'-lignanetriol 9'-glucoside
					Dihydroisomorphine-3-glucuronide
					4-Hydroxy-5-(3',5'-dihydroxyphenyl)-valeric acid-O-methyl-O-glucuronide
					ent-16b,19-Kauranediol 19-acetate
					C11354
					Glycerophosphocholine
					Dimetan
					Diethyldithiocarbamate
					20:2(5Z,11Z)
					Raffinose
					Shoyuflavone A
					N-a-Acetyl-L-arginine
					2-(4-Methyl-5-thiazolyl)ethyl octanoate
					N-Desmethylvinblastine
					Kaempferol 3-(3''-sulfatoglucoside)
					Cassiaside
					Gallocatechin 4'-methyl ether
					Erinapyrone C
					Todatriol glucoside
					8-hydroxy-10,12-octadecadiynoic acid
					NEPSILON,NEPSILON,NEPSILON-TRIMETHYLLYSINE
					Isoleucyl-Valine
					alpha-Furyl methyl diketone
					Cluster of Linalool oxide D 3-[apiosyl-(1->6)-glucoside]
					(9Me,4E,8E,10E-d19:3)sphingosine
					2'-O-Methyladenosine
					Tricosanedioic acid
					(R)-2-Hydroxyhexadecanoic acid
					N-(1-Deoxy-1-fructosyl)isoleucine
					N-(1-Deoxy-1-fructosyl)valine
					2-(2-Methylpropoxy)naphthalene
					PGE1 alcohol
					Cluster of Leucyl-Asparagine
					Phenethyl rutinoside
					3-Cyano-6-methylchromone
					1,3-Dimethoxybenzene
					Aspartyl-Isoleucine
					Moracin P
					(-)-2,7-Dolabelladiene-6beta,10alpha,18-triol
					(2S)-2-Butanol O-[b-D-Apiofuranosyl-(1->6)-b-D-glucopyranoside]
					Cluster of (±)-threo-1-(4-Hydroxyphenyl)-1,2,3-propanetriol
					PE(15:1(9Z)/0:0)
					S-D-Lactoylglutathione
					Oleuroside
					Hoduloside VIII
					2R-HOTrE
					3-(1,1-Dimethyl-2-propenyl)-8-(3-methyl-2-butenyl)xanthyletin
					(+)-Ligballinol
					Isosilybin
					(1x,2x)-Guaiacylglycerol 2-glucoside
					Salicin
					Erysothiopine
					2-O-(beta-D-galactopyranosyl-(1->6)-beta-D-galactopyranosyl) 2S-hydroxynonanoic acid
					9-hydroxy-10E,14Z-octadecadien-12-ynoic acid
					20-oxo-heneicosanoic acid
					8-iso-PGE2
					S-3-oxodecanoyl cysteamine
					Ribonic acid
					3-hydroxy-cis-5-octenoylcarnitine
					Myricetin 3-(4''-galloylrhamnoside)
					Ser-Glu
					Armillaripin
					NCGC00169670-02!(2S,3R,4S,5S,6R)-2-[4-[(3S,3aR,6S,6aR)-3-(4-hydroxy-3,5-dimethoxyphenyl)-1,3,3a,4,6,6a-hexahydrofuro[3,4-c]furan-6-yl]-2,6-dimethoxyphenoxy]-6-(hydroxymethyl)oxane-3,4,5-triol
					Triacetin
					3'-Methoxydihydroformononetin
					(Z)-2-Methyl-2-butene-1,4-diol 4-O-beta-D-Glucopyranoside
					Valyl-Arginine
					6-[5]-ladderane-1-hexanol
					SQDG 36:6
					Methyl 3-methyl-1-butenyl disulfide
					(2R,3R)-(-)-2-Benzyloxy-1,3,4-butanetriol
					6-Sialylgalactose
					lysoPC 18:2
					(E,E)-Futoamide
					Protogonyautoxin I
					Chrysaloin
					Desmethylverapamil
					Cluster of cis-beta-D-Glucosyl-2-hydroxycinnamate
					(E)-2-Methyl-2-buten-1-ol O-beta-D-Glucopyranoside
					Glutaminyl-Isoleucine
					Cluster of 4,6-Tricosanedione
					Dimethyl adipate
					Oleyl acetate
					Epicatechin-(2beta->7,4beta->6)-catechin
					Cellulose, microcrystalline
					Tetrahydrobiopterin
					2-Methyl-1,7-dioxaspiro[5.6]dodecane
					LysoPC(16:0)
					Cluster of Glucopyranosylmoranoline
					2-Methoxyestradiol-17beta 3-sulfate
					Glucosyl (2E,6E,10x)-10,11-dihydroxy-2,6-farnesadienoate
					Cluster of N2-Succinyl-L-glutamic acid 5-semialdehyde
					Gingerglycolipid C
					Marmesin rutinoside
					15-deoxy-delta-12,14-PGD2
					Allantoic acid
					Carvyl propionate
					Valyl-Proline
					cis-3-Hexenyl benzoate
					Leu-Ile
					Rutin
					Norrubrofusarin 6-beta-gentiobioside
					PE-NMe(O-16:0/O-16:0)
					L-2-Amino-5-hydroxypentanoic acid
					DGDG 34:3
					Hydroxyprolyl-Valine
					SQDG 36:5
					Quercetin 3-(2'''-galloylglucosyl)-(1->2)-alpha-L-arabinofuranoside
					Phenazaoxonium, 1-carbamoyl-7-diethylamino-3,4-dihydroxy-
					Inosine 2'-phosphate
					9Z-Dodecenal
					3-Acetyl-4-hydroxy-6-methyl-2H-pyran-2-one
					(Z)-15-Oxo-11-eicosenoic acid
					Epitestosterone sulfate
					PI(O-20:0/0:0)
					N-Acetyl-D-galactosaminitol
					Glepidotin C
					4,5-Dihydro-drospirenone-3-sulfate
					Kiwiionoside
					Prupaside
					Linalyl propionate
					2-(4-Methyl-5-thiazolyl)ethyl hexanoate
					Cluster of Nilutamide
					Gonyautoxin VI
					Isobutrin
					Resolvin E1
					Kaempferol 3-(2'',3''-diacetylrhamnoside)-7-rhamnoside
					Cluster of 1,5-Dihydroxy-3-methoxy-2-prenylxanthone
					Trigofoenoside A
					2'-Hydroxy-5'-methylacetophenone
					Cluster of Gly-Val
					26-Desglucoavenacoside B
					Capsochrome
					(24S)-24-fluoro-1alpha,25-dihydroxyvitamin D2 / (24S)-24-fluoro-1alpha,25-dihydroxyergocalciferol
					MG(20:3(5Z,8Z,11Z)/0:0/0:0)
					N-Nonanoylglycine
					PG 26:7
					N-Acetylamphetamine
					S-Furanopetasitin
					2-Methylpropyl benzoate
					Riesling acetal
					Sachaliside 2
					Styrene glycol, glucuronide
					4-Methylumbelliferyl .beta.-D-glucopyranoside
					Cluster of Isosyringinoside
					4,6-Dinitroresorcinol
					Candesartan O-glucuronide
					5'-Carboxy-gamma-chromanol
					Moniliformin
					3-hydroxybutyrylcarnitine
					5-Hydroxy-7,4'-dimethoxy-6,8-di-C-prenylflavanone 5-O-galactoside
					L-phenylalanyl-L-proline
					Cluster of Prosapogenin A
					18-methyl-8Z,11Z,14Z-nonadecatrienoic acid
					Ferulic acid 4-sulfate
					Robinetinidol-(4alpha->8)-catechin-(6->4alpha)-robinetinidol
					Oolongtheanin
					Valyl-Asparagine
					Quinupristin
					Dinor-PGF2alpha
					Formononetin 7-(6''-malonylglucoside)
					Cluster of (R)C(R)S-S-Propylcysteine sulfoxide
					2-Methoxyxanthone
					4'-Methyl-(-)-epigallocatechin 3-(4-methyl-gallate)
					7,8,2',4'-Tetrahydroxyisoflavone
					8,11,14-Eicosatriynoic acid
					Orcein
					Edetic Acid
					Cluster of Sapidolide A
					Homocitric acid
					Cluster of Spongioside A
					Hydroxyhomodestruxin B
					Piperitol
					Onchidal
					LysoPC(16:1(9Z))
					4-Methyl-2-phenyl-2-pentenal
					3-p-Coumaroylquinic acid
					Sorbitan palmitate
					Helianthoside A
					Serinyl-Valine
					1-(2,3-Dihydro-1H-pyrrolizin-5-yl)-1-butanone
					Heptadecanedioic acid
					trans-3,5-Dimethoxy-4-hydroxycinnamaldehyde
					(1R,2R)-3-oxo-2-pentyl-cyclopentanebutanoic acid
					5-Hydroxy-7,8-dimethoxyflavanone 5-rhamnoside
					Cluster of 6-Succinoaminopurine
					3a,17a-Dihydroxy-5b-androstane
					2-Octenal
					12-hydroxy-8E,10E-heptadecadienoic acid
					N-Nitrosopiperidine
					Cluster of Glu-Gln
					1'-Acetoxyeugenol acetate
					12-keto-10,11,14,15-tetrahydro-LTB4
					GlcCer(d16:2(4E,6E)/18:0(2OH))
					Glu-Thr-Arg
					9S,12S,13S-trihydroxy-10E,15Z-octadecadienoic acid
					Dimethyl fukiic acid
					Gericudranins A
					NCGC00380211-01!10-[6-[[3,5-dihydroxy-4-(3,4,5-trihydroxyoxan-2-yl)oxyoxan-2-yl]oxymethyl]-3,4-dihydroxy-5-(3,4,5-trihydroxyoxan-2-yl)oxyoxan-2-yl]oxy-1,6a,6b,9,9,12a-hexamethyl-2-methylidene-1,3,4,5,6,6a,7,8,8a,10,11,12,13,14b-tetradecahydropicene-4a-carboxylic acid
					Dinoravicholic acid
					1,2,3-Benzenetriol
					gamma-L-Glutamyl-gamma-L-glutamyl-L-methionine
					Aloe emodin w-acetate
					Eicosanedioic acid
					Glucosylisomaltol
					3-Hydroxy-4-methoxymandelate
					trans-Grandmarin isovalerate
					Matairesinol
					Pseudoprotogracillin
					3-O-Methylniveusin A
					Cinitapride
					Berteroin
					Pyridoxine
					Glucosyl 6-hydroxy-2,6-dimethyl-2E,7-octadienoate
					Cluster of Linalool 3,7-oxide beta-primeveroside
					Tuberoside B (Allium tuberosum)
					5-Amino-1-(5-phospho-D-ribosyl)imidazole
					PyroGlu-Ser-Arg
					2-O-Acetylarbutin
					Asparaginyl-Glutamate
					1-Isothiocyanato-7-(methylsulfinyl)heptane
					Diphenyl disulfide
					1-(3-Methylbutanoyl)-6-apiosylglucose
					(E,E)-3,7,11-Trimethyl-2,6,10-dodecatrienyl heptanoate
					Oleoside dimethyl ester
					Luteolin 7-lactate
					Harderoporphyrin
					Microcystin-YR
					4-Trifluoromethylphenol
					Symmetric dimethylarginine
					Pterosupin
					D-Urobilin
					1,5-Diferuloylquinic acid
					Malathion monocarboxylic acid
					Ethyl 2-hydroxypentanoate
					Dolichin B
					3-Methyl sulfolene
					Prolyl-Hydroxyproline
					Cluster of N-.alpha.-(tert-Butoxycarbonyl)-L-histidine
					3alpha,12alpha-Dihydroxy-5beta-chola-7,9(11)-dien-24-oic Acid
					4-Hydroxy-5-methyl-3(2H)-thiophenone
					Euchrenone b3
					Cluster of L-2-Amino-3-(1-pyrazolyl)propanoic acid
					D-Ribose 5-phosphate
					5-Methylthioribose 1-phosphate
					9,13-Dihydroxy-4-megastigmen-3-one 9-glucoside
					Cepharanthine
					Linolenic acid
					Alpha-D-Mannose
					Cluster of Butyl (S)-3-hydroxybutyrate glucoside
					5-Hexyltetrahydro-2-oxo-3-furancarboxylic acid
