# Supplementary material
Source: publisher figshare collection journal article supplement (https://tandf.figshare.com/articles/dataset/_/9798299)
Supplement: Supplementary file 3 [file 1 › Table S4 - Copy.xlsx]

## Sheet: Table S4
Table S4. PIE analysis of metabolites produced in the roots under control roots (CR), saline roots (NR), silicon roots (SiR), and salinity with silicon roots (NSiR) treatments.
27 elements included exclusively in "NR":	5 common elements in "NR" and "SiR":	6 elements included exclusively in "SiR":	27 common elements in "CR" and "NR":	31 common elements in "CR", "NR" and "SiR":	578 common elements in "CR", "NR", "SiR" and "NSiR":	24 common elements in "NR", "SiR" and "NSiR":	17 common elements in "SiR" and "NSiR":	44 elements included exclusively in "CR":	19 common elements in "CR" and "SiR":	18 common elements in "CR", "SiR" and "NSiR":	2 common elements in "CR" and "NSiR":	17 common elements in "CR", "NR" and "NSiR":	7 common elements in "NR" and "NSiR":	17 elements included exclusively in "NSiR":
Emmotin A	2-O-Acetyl-trans-coutaric acid	Coriandrone C	PE(15:1(9Z)/0:0)	Cluster of Butyl (S)-3-hydroxybutyrate glucoside	Cluster of 3-O-Caffeoylshikimic acid	1-Methoxy-1-(2,4,5-trimethoxyphenyl)-2-propanol	Indoxylglucuronide	2,6-Xylidine	(3S,6S)-3-Hydroxy-1,7-dioxaspiro[5.5]undecane	1,2,3,4-Tetra-O-acetyl-.beta.-D-glucopyranose	Monolinolenin (9c,12c,15c)	N-Methylnicotinic acid cation	Acetylisoniazid	Diethyl phthalate
Diethyl L-malate	3'-Methoxydihydroformononetin	Uranium pentafluoride	Phenazaoxonium, 1-carbamoyl-7-diethylamino-3,4-dihydroxy-	2'-Hydroxy-2,4,5,5'-tetramethoxychalcone	Glucose-1,3-mannose oligosaccharide	Neosakuranetin	4,2'-Dihydroxy-3-methoxy-5'-methylchalcone	Bis(3-tert-butyl-2-hydroxy-5-methylphenyl) sulfide	Ferulic acid 4-sulfate	5-Methylthioribose 1-phosphate	Hovenidulcioside B2	Cluster of 14,15-LTA4	Epicatechin 3-O-(3-O-methylgallate)	7-Hydroxy-2-methylisoflavone
1,9-Nonanedithiol	Moracin P	Gingerglycolipid C	Linalool 3,6-oxide primeveroside	3-(3,4-Dimethoxyphenyl)coumarin	Cluster of 6-Feruloylglucose 2,3,4-trihydroxy-3-methylbutylglycoside	5-Hydroxy-7-methoxyflavanone	Serinyl-Cysteine	Cluster of Drotaverine	D-1-[(3-Carboxypropyl)amino]-1-deoxyfructose	Cluster of 2-Hexylbenzothiazole		9,12,13-TriHOME(10)	Phlorisobutyrophenone 2-glucoside	(6RS)-22-oxo-23,24,25,26,27-pentanorvitamin D3 6,19-sulfur dioxide adduct / (6RS)-22-oxo-23,24,25,26,27-pentanorcholecalciferol 6,19-sulfur dioxide adduct
4-Coumaroylputrescine	Orinapterin	12(13)Ep-9-KODE	beta-Methylamino-L-alanine	Cluster of Linalool 3,7-oxide beta-primeveroside	Dibutyl phthalate	Benzoic acid, 4-benzoyl	Italipyrone	Dicyclohexyl disulfide	PA(20:3(8Z,11Z,14Z)/0:0)	Sesamol		(+/-)-N,N-Dimethyl menthyl succinamide	Hydroxytyrosol	1,5,8-Trihydroxy-3-methyl-2-prenylxanthone
Cluster of Carboxy-ibuprofen	3-Amino-1-methyl-5H-pyrido[4,3-b]indole	1,5-Diferuloylquinic acid	Cluster of Porric acid B	9,13-Dihydroxy-4-megastigmen-3-one 9-glucoside	Serinyl-Valine	PA 32:10	Dinoseb acetate	Arginyl-Asparagine	Corchorusoside E	5-Acetylamino-6-formylamino-3-methyluracil		Glu-Thr-Arg	Leu-Ile	7-Acetylbaccatin III
Hirsutin		Glucoraphanin	Artocommunol CA	1,7-Dimethylguanosine	Dimethyl 2-oxoglutarate	2,3-Diaminosalicylic acid	S-(2,3,4-Trihydroxybutyl)mercapturic acid	Cluster of Coronene	4-Nitrobenzoic acid	(3x,5x,10x)-9,10-Didehydroisohumbertiol O-[rhamnosyl-(1->4)-rhamnosyl-(1->2)-[rhamnosyl-(1->6)]-glucoside]		(1R,2R,4S,6R)-2,6-Fenchanediol 2-O-b-D-glucoside	3,9-Dimethyluric acid	formyl 2Z,4E,6Z-decatrienoate
Dihydrolipoate			Cluster of Palmitoyl glucuronide	Melongoside H	Cluster of Citrulline	Cluster of Hydroxylated N-acetyl desmethyl frovatriptan	5-Methoxyflavanone	3,4-Methylenedioxybenzoic acid	Ethyl beta-D-glucopyranoside	Glycolaldehyde dimer,mixture of stereoisomers		Symmetric dimethylarginine	2,2,4-Trimethyl-1,3-pentadienol diisobutyrate	NCGC00385785-01!(2R,3R,4S,5S,6R)-2-[[2-(3,4-dihydroxyphenyl)-5,7-dihydroxy-3,4-dihydro-2H-chromen-3-yl]oxy]-6-(hydroxymethyl)oxane-3,4,5-triol
N-Acetyl-6-O-L-fucosyl-D-glucosamine			(R)-2-Hydroxyhexadecanoic acid	Euchrenone b3	Cluster of Juglone glucoside	Piperenol A triacetate	Inosine 2'-phosphate	Cluster of 9-HOTE	Shoyuflavone A	Paspalitrem B		NCGC00385204-01!5-hydroxy-2-[2-hydroxy-3-[(2S,3R,4S,5S,6R)-3,4,5-trihydroxy-6-(hydroxymethyl)oxan-2-yl]oxyphenyl]-7,8-dimethoxychromen-4-one		MGDG 36:5
2-O-alpha-D-Galactopyranosyl-1-deoxynojirimycin			PA(16:0/0:0)	Epitheaflavic acid 3'-gallate	Diglycolic acid	Cysteinyl-Serine	Dexketoprofen	Genistein 8-C-glucoside	3-O-p-Coumaroylquinic acid	Cluster of Procyanidin B2		1-(3-Hydroxy-4-methoxyphenyl)-1,2-ethanediol		(Dimethoxymethyl)benzene
1,N2-propanodeoxyguanosine			Gossyvertin	6'-Sialyllactose	6-Feruloylglucose 2,3,4-trihydroxy-3-methylbutylglycoside	Galiposin	7-Methoxy-2-methylisoflavone	D-Glucaro-1,4-lactone	nicotiflorin	MG(0:0/20:3(11Z,14Z,17Z)/0:0)		Glucosyl 6-hydroxy-2,6-dimethyl-2E,7-octadienoate		2,3-Diketo-L-gulonate
Enantiomultijugin			Cluster of 6-Hydroxyluteolin 6,4'-dimethyl ether 7-rutinoside	2-(4-Methyl-5-thiazolyl)ethyl octanoate	Caffeic acid	Cluster of Glu-Gln	Isomugineic acid	Oleuroside	SORBATE	5,7,3',4',5'-Pentahydroxy-3,6,8-trimethoxyflavone		1-Hydroxyvitamin D3 3-D-glucopyranoside		Mucic acid
Decoyinine			Muramic acid	Hydroxysepiapterin	Cluster of NCGC00180160-02!2-(3,4-dimethoxyphenoxy)-6-[(3,4,5-trihydroxyoxan-2-yl)oxymethyl]oxane-3,4,5-triol	Robinetinidol-(4alpha->8)-catechin-(6->4alpha)-robinetinidol	Tuberosin	5-Ethyl-3-methyl-2E,4E,6E-nonatriene	N-(1-Deoxy-1-fructosyl)valine	PA(17:0/18:2(9Z,12Z))		Pymetrozin		Asperphenamate analogoue with additional glycine
Boviquinone 4			3-(4-Hydroxy-3-methoxyphenyl)-2-methylpropionic acid	Vanilloloside	1-Palmitoylglycerol	6-Oxa-3,9-dithiaundecane-1,11-diol	1-Propenyl 1-(1-propenylthio)propyl disulfide	NCGC00180206-02!5-hydroxy-7-[3,4,5-trihydroxy-6-(hydroxymethyl)oxan-2-yl]oxy-2-[4-(3,4,5-trihydroxy-6-methyloxan-2-yl)oxyphenyl]chromen-4-one	N-Acetyl-D-galactosaminitol	(E,E)-Futoamide		Hydroxyprolyl-Valine		NCGC00169670-02!(2S,3R,4S,5S,6R)-2-[4-[(3S,3aR,6S,6aR)-3-(4-hydroxy-3,5-dimethoxyphenyl)-1,3,3a,4,6,6a-hexahydrofuro[3,4-c]furan-6-yl]-2,6-dimethoxyphenoxy]-6-(hydroxymethyl)oxane-3,4,5-triol
N2-Galacturonyl-L-lysine			(3R)-3,4-Dihydroxy-3-(hydroxymethyl)butanenitrile 4-glucoside	Rutarin	Cluster of Glutamic acid	Licorice glycoside D1	C.I. Food Black 2	tetradecyl butyrate	Palmidin A	Trp-Pro-Arg		5,8-Dimethoxychalepensin		(2E)-hexenedioylcarnitine
7'-hydroxyabscisic acid			Queuine	4-Feruloyl-1,5-quinolactone	Cluster of Raffinose	7-Hydroxy-6,8-di-C-methylflavanone 7-O-arabinoside	5-Deoxyribose-1-phosphate	dehydro-D-arabinono-1,4-lactone	2,4-octadecadienoic acid	Glyceollidin I		glycerol 2-phosphate		Cinnamtannin A2
Caryatin			8-Oxoguanine	Cluster of Myo-inositol-6-phosphate	4-Methylbenzotriazole	Homolanthionine	Sakuranetin	3,7-Dimethyl-5-octene-1,7-diol 1-glucoside	De-O-methylsimmondsin	5-O-beta-D-Xylopyranosyl-L-arabinose		2',4',alpha-Trihydroxy-4-methoxydihydrochalcone		Alpha-D-Mannose
Prolyl-Hydroxyproline			Methyl 7-epi-12-hydroxyjasmonate glucoside	N-(1-Deoxy-1-fructosyl)methionine	Cluster of 5-Butyltetrahydro-2-oxo-3-furancarboxylic acid	Methyldalbergin	Selenium hexasulfide	Cytarabine	(15a,20R)-Dihydroxypregn-4-en-3-one 20-[glucosyl-(1->4)-6-acetyl-glucoside]	Lorazepam		Kaempferide		D-glycero-L-galacto-Octulose
1'-Acetoxyeugenol acetate			Cluster of Pantothenamide	(1x,2x)-Guaiacylglycerol 2-glucoside	Catechin	Kanzonol N		D-Glucoheptose	Cluster of (2R)-1-O-beta-D-Galactopyranosylglycerol	Allixin
MLS000563045-01!			Cluster of Leu-Gly	Tamarixetin 3-O-sulfate	Glycerophosphocholine	NCGC00380211-01!10-[6-[[3,5-dihydroxy-4-(3,4,5-trihydroxyoxan-2-yl)oxyoxan-2-yl]oxymethyl]-3,4-dihydroxy-5-(3,4,5-trihydroxyoxan-2-yl)oxyoxan-2-yl]oxy-1,6a,6b,9,9,12a-hexamethyl-2-methylidene-1,3,4,5,6,6a,7,8,8a,10,11,12,13,14b-tetradecahydropicene-4a-carboxylic acid		Ascorbyl stearate	Cluster of 3'-O-Methyl-(-)-epicatechin-5-O-sulphate
Secoeremopetasitolide A			2-Phenylethyl beta-D-glucopyranoside	Decarbamoylgonyautoxin III	Cluster of L-2-Amino-3-(1-pyrazolyl)propanoic acid	4,6,3',4'-Tetramethoxyaurone		4,6-Dinitroresorcinol
Isoleucyl-Valine			Lumazine	Cluster of Guanosine	Glucopyranosylmoranoline	Inodxyl glucuronide		Cluster of dimethadione
S-Glutaryldihydrolipoamide			(R)-lipoic acid	Ginkgolide C	Butyl isopropyl disulfide	Dihydro-2,4-dimethyl-6-(1-methylpropyl)-4H-1,3,5-dithiazine		Erinapyrone C
Butyl salicylate			4-Deacetylneosolaniol	MLS001148384-01!TERBUTALINE SULFATE	4-Hydroxy-Benzotriazol	3'-Hydroxy-5,7,4'-trimethoxy-8-C-methylflavanone		13-KODE
S-3-oxodecanoyl cysteamine			2-Hydroxynevirapine	Eriodictyol 7,3'-dimethyl ether 4'-prenyl ether	Phosphocholine	PE(22:5(4Z,7Z,10Z,13Z,16Z)/16:0)		5'-Methylthioadenosine
(-)-erythro-Anethole glycol 2-glucoside			4'-Methylisoscutellarein 8-(2''-sulfoglucoside)	Gallagic acid	6S-methyl-octanoic acid			trans-p-Menthane-7,8-diol 8-glucoside
Cluster of (2E)-hexenedioylcarnitine			6-Succinoaminopurine	Conferone	5-Hexyltetrahydro-2-oxo-3-furancarboxylic acid			4-Methyl-2-phenyl-2-pentenal
MLS000563514-01!2-hydroxy-4-(2-hydroxy-4-methoxy-3,6-dimethylbenzoyl)oxy-3,6-dimethylbenzoic acid			Cluster of 6-Succinoaminopurine	1-Isothiocyanato-7-(methylsulfinyl)heptane	Hydralazine			Paxilline
				Leu-Pro	1,8-Octanedithiol			Gonyautoxin VI
				1-hydroxy-5-phenyl-3-pentanone	Glycerol 1-propanoate			Epimesquitol-4alpha-ol
				N-Salicyloylaspartic acid	Cluster of Linoleic acid			2-Hydroxy-4-imino-2,5-cyclohexadienone
				epi-4'-hydroxyjasmonic acid	MG(0:0/18:0/0:0)			NCGC00169650-03!5,7-dihydroxy-2-(4-hydroxyphenyl)-8-[3,4,5-trihydroxy-6-(hydroxymethyl)oxan-2-yl]-6-(3,4,5-trihydroxyoxan-2-yl)chromen-4-one
					Pyrazinamide			PE(22:6(4Z,7Z,10Z,13Z,16Z,19Z)/0:0)
					Cluster of Yuccaol C			(Z)-15-Oxo-11-eicosenoic acid
					2-Keto-6-acetamidocaproate			Leucyl-Aspartate
					lauric acid			3-hydroxy-cis-5-octenoylcarnitine
					Cluster of 1,4-Ipomeadiol			Harderoporphyrin
					D-(-)-Fructose			2-Methoxyestradiol-17beta 3-sulfate
					Glycerol tripropanoate			1H-Pyrrole-3-propanoic acid, 5-[(1,2-dihydro-2-oxo-3H-indol-3-ylidene)methyl]-2,4-dimethyl-
					Cluster of 5-Oxoprolinate			N-Methylcalystegine B2
					dimethyl (E)-2-methylbut-2-enedioate			N-(1-Deoxy-1-fructosyl)isoleucine
					Maltulose			3,3',5-Trihydroxy-4'-methoxy-6,7-methylenedioxyflavone 3-glucuronide
					Arginyl-Phenylalanine			2-Methoxyxanthone
					Cluster of (Z)-13-Oxo-9-octadecenoic acid			Cepharanthine
					Cluster of (R)-2-ethylmalic acid			hydroxyl diethyl succinate
					Cluster of D-Aspartic acid
					Cluster of 1,5-Dibutyl methyl hydroxycitrate
					Glucosyl (E)-2,6-Dimethyl-2,5-heptadienoate
					Cluster of NCGC00180823-02!(3R,4R,5R)-5-[(E)-3-(3,4-dihydroxyphenyl)prop-2-enoyl]oxy-3,4-dihydroxycyclohexene-1-carboxylic acid
					Raffinose
					Cluster of D-Tryptophan
					2,2-Dihydroperoxypropane
					2-Methylpropyl hexanoate
					Cluster of Adenine
					lysoPC 18:2
					Hovenitin I
					Dihydrouracil
					Cluster of (S)-malyl alpha-D-glucosaminide
					(-)-1-Methylpropyl 1-propenyl disulfide
					Fructose
					5-Acetyl-2-hydroxybenzoic acid
					trans-1,2-dimethylcyclohexane
					Cluster of 5-Hexyltetrahydro-2-oxo-3-furancarboxylic acid
					1-Isothiocyanato-7-(methylthio)heptane
					3-oxopimelic acid
					formyl 2E,4Z,6Z-decatrienoate
					Cluster of Pseudoecgonine
					Quinic acid
					Cluster of 4,4'-Thiodiphenol
					N-(2,5-Dihydroxyphenyl)pyridinium(1+)
					NCGC00180666-02!(2R,3S,4S,5R,6S)-2-[(3,4,5-trihydroxyoxan-2-yl)oxymethyl]-6-(3,4,5-trimethoxyphenoxy)oxane-3,4,5-triol
					alpha,alpha'-diethyl-4,4'-bis(2-propynyloxy)stilbene
					Cluster of Norleucine
					3-Methyl-3H-imidazo[4,5-f]quinoxalin-2-amine
					Cluster of ADENOSINE
					Cluster of Ryanodine
					5-Amino-1-(5-phospho-D-ribosyl)imidazole
					Pimelylcarnitine
					1-O-(8R-hydroxy-8-methyl-3Z,9-decadienoyl)-beta-D-glucopyranose
					Cluster of Tryptophan
					1',2'-Dihydro-1,1'-dimethyl-2'-oxo-4,4'-bipyridinium(1+)
					2,4,6-Triethyl-1,3,5-oxadithiane
					Cluster of 7E,9Z,12Z-octadecatrienoic acid
					N-(4-Hydroxycinnamoyl)tyrosine
					Pyrrolidino-[1,2E]-4H-2,4-dimethyl-1,3,5-dithiazine
					S-(2-carboxypropyl)-Cysteamine
					Cluster of 1,5-Dihydroxy-3-methoxy-2-prenylxanthone
					Erucamide
					Bolusanthin
					L-Glutamic acid, dimethyl ester
					Ornithine
					Dihydro-4,6-dimethyl-2-(2-methylpropyl)-4H-1,3,5-dithiazine
					Cluster of (R)C(R)S-S-Propylcysteine sulfoxide
					Cluster of Demissine
					Epicatechin
					Benzyl O-[arabinofuranosyl-(1->6)-glucoside]
					Cluster of (20S)-1alpha,20,25-trihydroxy-24-norvitamin D3/(20S)-1alpha,20,25-trihydroxy-24-norcholecalciferol
					2-Isopropyl-1,4-benzenediol
					Cluster of Phosphatidylethanolamine lyso 18:2
					PC(18:2(9Z,12Z)/18:2(9Z,12Z))
					Retrocalamin
					ent-Gallocatechin 4'-methyl ether
					L-Xylonate
					2-Keto-3-deoxyoctonic acid
					Cluster of Oleic acid
					Methylthiomethyl 2-methylbutanethiolate
					Ethyl aconitate
					Subaphylline
					3-O-alpha-L-rhamnopyranosyl-3-hydroxydecanoic acid
					Procyanidin B2
					Oleoside dimethyl ester
					Allithiamine
					Valine
					Cluster of Subaphylline
					Myristic acid
					Danazol
					LysoPC(16:0)
					Pregnenolone sulfate
					Gericudranins A
					Cluster of 2-Linoleoylglycerol
					Hoduloside VIII
					6-Epi-7-isocucurbic acid glucoside
					Cluster of Valine
					Glucose 6-phosphate
					Cluster of Squamolone
					Cluster of Proline
					8-Methoxyeriodictyol
					Cluster of 3-Methylglutaconic acid
					Allantoic acid
					FA 18:0
					2,3-Methyleneglutaric acid
					14alpha-Hydroxy-4beta-deoxypaxilline
					Cluster of 2-Dodecylbenzenesulfonic acid
					GlcCer(d16:2(4E,6E)/18:0(2OH))
					Secasterone
					Phytosphingosine
					Didymocalyxin B
					4-Trifluoromethylphenol
					LysoPC(18:1(9Z))
					N-[[[4-[[5-(Dimethylamino)-1-oxopentyl]amino]phenyl]amino]thioxomethyl]-4-(1,1-dimethylethyl)benzamide
					NCGC00385363-01!(3-hydroxyphenyl)-(2,4,6-trihydroxyphenyl)methanone
					1,3-Dimethoxybenzene
					Cluster of 3',5'-cyclic dAMP
					Cluster of 1-palmitoyl-2-linoleoyl-sn-glycero-3-phospho-(1'-rac-glycerol)
					Gallocatechin 4'-methyl ether
					Cluster of Monolinolenin (9c,12c,15c)
					5-Hydroxy-7,4'-dimethoxy-6,8-di-C-prenylflavanone 5-O-galactoside
					Perilloside A
					2-Pivaloyl-1,3-indandione
					L-Targinine
					S-Formylglutathione
					Linoleic acid
					Dibutyl malate
					2-Isopropyl-5-methoxypyrazine
					Ethyl 3-O-beta-D-glucopyranosyl-butanoate
					Cluster of Polyphyllin B
					1-(sn-Glycero-3-phospho)-1D-myo-inositol
					N-Desmethylvinblastine
					Tricholomic acid
					Glucosyl (2E,6E,10x)-10,11-dihydroxy-2,6-farnesadienoate
					Cluster of Dimetan
					Cluster of Piperochromenoic acid
					Cluster of (6RS)-22-oxo-23,24,25,26,27-pentanorvitamin D3 6,19-sulfur dioxide adduct / (6RS)-22-oxo-23,24,25,26,27-pentanorcholecalciferol 6,19-sulfur dioxide adduct
					Cluster of Melongoside H
					10-oxo-nonadecanoic acid
					Anthenoside A
					Cysteineglutathione disulfide
					Ceriporic acid C
					Dimercaprol
					Cluster of Linalool oxide D 3-[apiosyl-(1->6)-glucoside]
					Phenethyl phenylacetate
					D-Gluconic acid Mn(II) salt
					4'-Methyl-(-)-epigallocatechin 3-(4-methyl-gallate)
					Chrysaloin
					Benomyl
					2-Methyl-1,4-benzoquinone
					Marmesin rutinoside
					PC(16:0/18:2(9Z,12Z))
					Matteucinol 7-O-glucoside
					2-Ethylglutaric acid
					Luteolin 7-lactate
					Vulgarole
					3-Hydroxy-4-methoxymandelate
					4'-Hydroxy-5,5'-diisopropyl-2,2'-dimethyl-3,4-biphenylquinone
					Cluster of 5-ethyl-5-methyl-2,4-oxazolidinedione
					Schottenol 3-glucoside
					Cluster of Isosyringinoside
					lysoPC 18:3
					beta-(2-Methoxyphenoxy)-lactic acid
					Epicatechin 3-glucoside
					Cluster of (R)-14-Methyloxacyclotetradecan-2-one
					5-Hydroxy-7,2',4'-trimethoxy-3',6'-diketoflavone
					Pterosupin
					Viscutin 1
					URIDINE 5'-DIPHOSPHOGALACTOSE
					6-Hydroxycoumarin
					Cluster of D-erythro-L-galacto-Nonulose
					Trigofoenoside A
					Prolyl-Asparagine
					Asterlingulatoside D
					Dihydroisomorphine-3-glucuronide
					Pentadecylic acid
					Cluster of PC(19:3(10Z,13Z,16Z)/0:0)
					Gly-Cys-Lys
					9'-Carboxy-gamma-chromanol
					Arginine
					3-(2-Methylpropyl)pyridine
					Cluster of PE 36:4
					5'-Carboxy-gamma-chromanol
					Methyl-3-ethyl-butanoate
					Benzoylmalic acid
					Isorhamnetin 7-O-sulfate
					Ala-Phe-Lys
					Salicylic acid
					3,5,7-Trihydroxyflavone 3-glucoside-8-sulfate
					Sulfoxone
					Cluster of Hovenidulcioside B1
					Aspartyl-Glutamine
					Glycerol 1-myristate
					Cluster of Emamectin B1a
					Cluster of C17 Sphingosine
					(Z)-Tamarindienal
					Silymonin
					NCGC00160220-01!VINCANIDINE
					Palmitoyleicosapentaenoyl phosphatidylcholine
					(5E,10E)-19-fluoro-1alpha-hydroxyvitamin-D3 / (5E,10E)-19-fluoro-1alpha-hydroxycholecalciferol
					Cluster of PI(18:0/16:2(9Z,12Z))
					Cluster of 9-HPODE
					Matairesinol
					Calystegin A3
					Nepetariaside
					D-Turanose, permethyl-
					Cluster of 2-Hydroxy-4-methylbenzaldehyde
					Chlorogenoquinone
					Todatriol glucoside
					NEPSILON,NEPSILON,NEPSILON-TRIMETHYLLYSINE
					Pelargonidin 3-glucoside-5-(6''-acetylglucoside)
					L-xylono-1,4-lactone
					4-O-alpha-D-Glucopyranuronosyl-D-galactose
					9-oxo-2,4,5,7-decatetraenoic acid
					16-hydroxy-9E-hexadecenoic acid
					Neotrehalose
					Cluster of Etherolenic acid
					Methylmalonate
					PSF-A
					trans-3,5-Dimethoxy-4-hydroxycinnamaldehyde
					Cluster of 6,10,14-Trimethyl-5,9,13-pentadecatrien-2-one
					2-O-(beta-D-galactopyranosyl-(1->6)-beta-D-galactopyranosyl) 2S-hydroxynonanoic acid
					Phosphatidylcholine lyso 20:5
					Cluster of Jascaric acid
					7-O-Methyllicoricidin
					Phenylalanine
					9S-hydroxy-10S,11S-epoxy-12Z,15Z-octadecadienoic acid
					Cluster of Distichonic acid B
					Cluster of Prosapogenin A
					Cluster of N-Acetylhistidine
					5S,15S-diHPETE
					Cluster of LPA(0:0/18:2(9Z,12Z))
					Salicin
					NCGC00168949-02!(2R,3R,4S,5S,6R)-2-[[7-hydroxy-1-(4-hydroxy-3,5-dimethoxyphenyl)-3-(hydroxymethyl)-6,8-dimethoxy-1,2,3,4-tetrahydronaphthalen-2-yl]methoxy]-6-(hydroxymethyl)oxane-3,4,5-triol
					4-Methylumbelliferyl .beta.-D-glucopyranoside
					2,3-Dihydro-5-methyl-1H-pyrrolizine-7-carboxaldehyde
					Erysothiopine
					2-(2-Methylpropoxy)naphthalene
					Orcein
					Isosyringinoside
					Methyl 4-methoxycinnamate
					Quercetin 3-methyl ether 7-rhamnoside-3'-xyloside
					2-(Ethoxymethyl)furan
					Formononetin 7-(6''-malonylglucoside)
					Cluster of 5,7-Icosanedione
					Cluster of Medicarpin 3-O-(6'-malonylglucoside)
					(9Me,4E,8E,10E-d19:3)sphingosine
					FA 17:0
					Nuatigenin 3-[rhamnosyl-(1->2)-glucoside]
					6-Methoxynaphthaleneacetic acid
					Cluster of 3-[(2E)-2-(Nitromethylidene)hydrazinyl]benzoic acid
					PI(O-18:0/0:0)
					Phe-Asp-Lys
					3Z-nonenal
					MG(18:0/0:0/0:0)
					4-Methyloctyl acetate
					(9R,13R)-10-oxo-11-phytoenoic acid
					Cluster of Dehydropachyrrhizone
					Hexacosanedioic acid
					DG(20:5(5Z,8Z,11Z,14Z,17Z)/0:0/20:5(5Z,8Z,11Z,14Z,17Z)) (d5)
					Cluster of 3,7-Dihydroxy-2-[4-hydroxy-3-(4-hydroxy-3-methylbutyl)phenyl]-5,6-dimethoxy-4H-1-benzopyran-4-one
					Norfuraneol
					Moniliformin
					NCGC00180782-02!5,7-dihydroxy-2-(4-hydroxyphenyl)-6-[3,4,5-trihydroxy-6-(hydroxymethyl)oxan-2-yl]chromen-4-one
					Norecasantalic acid
					Dihydronaringenin-O-sulphate
					S-D-Lactoylglutathione
					4-Hydroxy-5-(3',4'-dihydroxyphenyl)-valeric acid-O-methyl-O-glucuronide
					TR-Saponin A
					20-oxo-heneicosanoic acid
					6-Sialylgalactose
					9-hexadecenal
					Cluster of N-.alpha.-(tert-Butoxycarbonyl)-L-histidine
					5,9-octadecadiynoic acid
					Cluster of 13-oxo-octadecanoic acid
					(25R)-1beta,3alpha,7alpha-trihydroxy-5beta-cholestan-27-oyl taurine
					NCGC00380956-01!(E)-9-hydroxy-6-[3,4,5-trihydroxy-6-(hydroxymethyl)oxan-2-yl]oxydec-4-enoic acid
					Monoelaidin
					8E-Tetradecenyl acetate
					Citrulline
					16E-octadecenoic acid
					Cluster of Spongioside A
					Helianthoside A
					Chromium(III) acetate
					Cluster of Phenylalanine
					12-Hydroxyhexacosanoic acid
					Cluster of 10R-HODE
					N-Acetylamphetamine
					Lauroyl diethanolamide
					Cluster of 3-Methyl sulfolene
					Cluster of 4,6-Tricosanedione
					Nepetaside
					ADENOSINE
					Candesartan O-glucuronide
					Benzyl gentiobioside
					S-Japonin
					3-Methyl-5-pentyl-2-furanundecanoic acid
					Cluster of N-(1-Deoxy-1-fructosyl)glycine
					Cluster of IC202C
					Tracheloside
					Cluster of AS 1-2
					15-deoxy-delta-12,14-PGD2
					Cluster of Isovalerylglucuronide
					Lactose 6-phosphate
					Cluster of PE(16:0/0:0)
					Aloe emodin w-acetate
					3-O-Caffeoylshikimic acid
					Sorbitan palmitate
					MG(20:2(11Z,14Z)/0:0/0:0)
					Gingerglycolipid A
					Triacetin
					PA(18:2(9Z,12Z)/0:0)
					Erythritol bis(carbonate)
					4,5-Dihydro-drospirenone-3-sulfate
					Octanoylglucuronide
					3-Phenylpropyl glucosinolate
					OCTOPAMINE
					Cluster of Methionine sulfoxide
					Cluster of Asparaginyl-Histidine
					3-(1,1-Dimethyl-2-propenyl)-8-(3-methyl-2-butenyl)xanthyletin
					4-Methoxyphlorizin
					Robinetinidol-4alpha-ol
					PE-NMe(O-16:0/O-16:0)
					(+)-15S-hydroxy-hexadecanoic acid
					C11354
					Apigenin 7-glucuronide-4'-(6''-malonylglucoside)
					Armillaripin
					Pseudoprotogracillin
					(7'R,8'R)-4,7'-Epoxy-3',5-dimethoxy-4',9,9'-lignanetriol 9'-glucoside
					Epicatechin 3-O-(4-methylgallate)
					MG(20:3(5Z,8Z,11Z)/0:0/0:0)
					Ile-Ile-Arg
					C.I. Pigment Red 149
					3-[(2E)-2-(Nitromethylidene)hydrazinyl]benzoic acid
					2-Methyl-1,7-dioxaspiro[5.6]dodecane
					Glucosylisomaltol
					3-Anisaldehyde
					L-beta-aspartyl-L-alanine
					5-hexynoic acid
					7-hydroxymethotrexate
					5-Hydroxy-7,8-dimethoxyflavanone 5-rhamnoside
					4-Hydroxy-5-(3',5'-dihydroxyphenyl)-valeric acid-O-methyl-O-glucuronide
					Mahaleboside
					PA 30:7
					Cluster of Uridine
					Isosilybin
					Cluster of 12,13-DiHODE
					D-Ribose 5-phosphate
					5''-(4-Hydroxy-(E)-cinnamoyl) alpha-L-arabinofuranosyl-(1->3)-beta-D-xylopyranosyl-(1->4)-D-xylopyranoside
					(1R*,2R*,4R*,8S*)-p-Menthane-1,2,8,9-tetrol 9-glucoside
					Pantoyllactone glucoside
					MG(22:1(13Z)/0:0/0:0)
					Glycerylphosphorylethanolamine
					Dimethyl adipate
					N-Benzoylaspartic acid
					Glepidotin C
					Alliosterol 1-rhamnoside 16-galactoside
					Etaspirene
					Viscumiside A
					Pulchellidin 3-glucoside
					Haploside B
					(E)-2-Methyl-2-buten-1-ol O-beta-D-Glucopyranoside
					Cluster of Citrusin C
					PI 42:7
					(2R,3R)-(-)-2-Benzyloxy-1,3,4-butanetriol
					PA 42:6
					cis-3-Hexenyl benzoate
					Cluster of 5-Hydroxy-6,7,8,4'-tetramethoxyflavanone
					Biotripyrrin-a
					Avocadene 2-acetate
					3-Hydroxy-4,6-heptadiyne-1-yl 1-glucoside
					Linolenic acid
					2-Methylpropyl benzoate
					Vicine
					9Z-Dodecenal
					NCGC00385042-01!3-hydroxy-2-[(E)-3-(4-hydroxyphenyl)prop-2-enoyl]oxy-3-methoxycarbonylpentanedioic acid
					a-L-Arabinofuranosyl-(1->3)-b-D-xylopyranosyl-(1->4)-D-xylose
					Anofinic acid
					1-Palmitoyl-2-hydroxy-sn-glycero-3-phospho-(1'-rac-glycerol)
					8,11,14-Eicosatriynoic acid
					Prupaside
					2-Octenoylcarnitine
					Gingerglycolipid B
					Cluster of L-galactono-1,4-lactone
					gamma-L-Glutamyl-gamma-L-glutamyl-L-methionine
					Salvianolic acid L
					Onitin
					26-Desglucoavenacoside B
					N'-((8-Hydroxy-2-quinolinyl)methylene)-3-phenylpropanohydrazide
					Cluster of N-methyl-2-oxoglutaramic acid
					Brosimacutin G
					Bancroftinone
					Cluster of Anandamide (18:2, n-6)
					Hesperetin 5,7-O-diglucuronide
					Tuberoside B (Allium tuberosum)
					Cellulose, microcrystalline
					Lusianin
					Piperitol
					Tetrodotoxin
					Glycerol 2-(9Z,12Z-octadecadienoate) 1-hexadecanoate 3-O-[alpha-D-galactopyranosyl-(1->6)-beta-D-galactopyranoside]
					(9Z)-(7S,8S)-Dihydroxyoctadecenoic acid
					Cluster of Glucopyranosylmoranoline
					1-(3-Methylbutanoyl)-6-apiosylglucose
					PI(17:2(9Z,12Z)/0:0)
					PE(20:5(5Z,8Z,11Z,14Z,17Z)/0:0)
					hexadecyl hexanoate
					Apigenin 7-(2''-acetyl-6''-methylglucuronide)
					4-Hydroxy-benzenepropanedioate
					2'',6''-Digalloyliriflophenone 3-C-glucoside
					C.I. Acid Red 13
					Cluster of Carthamidin
					9-Hydroxy-4-methoxypsoralen
					11:0(10Me,10Me)
					3-Hydroxy-2H-pyran-2-one
					N-Nonanoylglycine
					12-keto-10,11,14,15-tetrahydro-LTB4
					Mycolipanolic acid (C28)
					Linalyl propionate
					20:2(5Z,11Z)
					(S)-carnitinyl-CoA betaine
					Dolichin B
					5,7-Dihydroxy-3,6,8,2',4',5'-hexamethoxyflavone
					3-p-Coumaroylquinic acid
					trans-Grandmarin isovalerate
					3-hydroxybutyrylcarnitine
					Umbelliferyl arachidonate
					N6-Carbamoyl-L-threonyladenosine
					6,14-dimethyl-octadecanoic acid
					Phosphatidylethanolamine 18:1-18:2
					Naringenin 7-(2-p-Coumaroylglucoside)
					4-Hydroxybenzyl isothiocyanate rhamnoside
					N-stearoyl valine
					Onchidal
					S-Acetyldihydrolipoamide
					Formononetin 7-(6''-methylmalonylglucoside)
					Chinenoside I
					Calcitroic acid
					Quercetin 3-(2'',3'',4''-triacetylgalactoside)
					Patulin
					Starch acetate
					Amritoside
					Linderoflavone A
					L-2-Amino-5-hydroxypentanoic acid
					Cluster of Nilutamide
					Cluster of Sapidolide A
					rac-5,6-Epoxy-retinoyl-beta-D-glucuronide
					Ustiloxin D
					1-(2,3-Dihydro-1H-pyrrolizin-5-yl)-1-butanone
					1-(8-[3]-ladderane-octanyl)-2-(8-[3]-ladderane-octanyl)-sn-glycerophosphoethanolamine
					Rhodinyl isovalerate
					LysoPC(20:4(5Z,8Z,11Z,14Z))
					N-arachidonoyl alanine
					Mayolene-18
					Licoricesaponin C2
					rhodexin A
					Heptadecanedioic acid
					10-hydroxy-16-oxo-hexadecanoic acid
					13S-HOME(11E)
					Candesartan N2-glucuronide
					Dioxydemeton-S-methyl
					(1R,2R)-3-oxo-2-pentyl-cyclopentanebutanoic acid
					MLS001097641-01!
					Pheophorbide a
					12-hydroxy-8E,10E-heptadecadienoic acid
					4,5-Dihydro-1-benzoxepin-3(2H)-one
					4-Methylbenzoic acid
					URIDINE-5-MONOPHOSPHATE
					16:1(10Z)(15Me)
					PG(18:2(9Z,12Z)/0:0)
					Eicosanedioic acid
					Cluster of SQDG 34:3
					DGDG 40:3
					(E,E)-3,7,11-Trimethyl-2,6,10-dodecatrienyl heptanoate
					10-Hydroxyloganin
					MGDG 45:5
					(Z)-Resveratrol 3,4'-diglucoside
					Isosorbide Mononitrate
					4-Methylumbelliferyl .beta.-D-glucuronide
					Rifapentine
					Meticillin
					Cluster of 9-(beta-D-Ribofuranosyl)zeatin
					heptaprenyl diphosphate
					N-Oleoylethanolamine
					5,4'-Dihydroxy-3,7,3'-trimethoxy-6,8-dimethylflavone
					2,5,8,9-tetracetoxy-15-hydroxy-3-benzoyloxyacetoxy-7-isobutyroyloxy-14-oxojatropha-6(17),11E-diene
					Pubescenol
					Lippioside I
					Argininosuccinic acid
					Ephedrannin A
					Kaempferol 3-(3''-sulfatoglucoside)
					PyroGlu-Ser-Arg
					Tricosanedioic acid
					Pongamoside A
					(S)-Homostachydrine
					Negletein 6-[rhamnosyl-(1->2)-fucoside]
					D-Urobilin
					alpha-Hydroxymetoprolol
					Ethyl 2-hydroxypentanoate
					Gamma-Glutamyltyrosine
					2,4-Dinitrophenol
					Cluster of PI(P-16:0/0:0)
					N-Nitrosopiperidine
					1-Pyrrolidinecarboxaldehyde, 3-(1,3-benzodioxol-5-ylmethylene)-2-oxo-
					Oleyl acetate
					Hydroxynervonic acid
					7-Methyl-2-benzofurancarboxaldehyde
					3Z,6Z,9Z-Octadecatrienyl acetate
					Cluster of NCGC00169491-02!(4S)-4-hydroxy-3,5,5-trimethyl-4-[(E)-3-[(2R,3R,4S,5S,6R)-3,4,5-trihydroxy-6-(hydroxymethyl)oxan-2-yl]oxybut-1-enyl]cyclohex-2-en-1-one
					1-Acetoxy-2-hydroxy-5,12,15-heneicosatrien-4-one
					Diphenyl disulfide
					Formiminoglutamic acid
					Bis(2-furanylmethyl) sulfide
					(9R,10S,12Z)-9,10-Dihydroxy-8-oxo-12-octadecenoic acid
					Astragalin
					PC 36:3
					alpha-Furyl methyl diketone
					NCGC00168946-02!5-hydroxy-2-(4-methoxyphenyl)-3-[(2S,3R,4S,5S,6R)-3,4,5-trihydroxy-6-(hydroxymethyl)oxan-2-yl]oxy-7-[(2S,3R,4R,5R,6S)-3,4,5-trihydroxy-6-methyloxan-2-yl]oxychromen-4-one
					Taurolithocholate sulfate
					Quinupristin
					Epicatechin-(2beta->7,4beta->6)-catechin
					Deltarasin
					Cinncassiol D2 glucoside
					Myricetin 3-(4''-galloylrhamnoside)
					Acetophenazine
					MLS000697730-01!
					(5S,6R)-2'-Deoxyuridine glycol
					PA(20:3(8Z,11Z,14Z)/17:1(9Z))
					Kiwiionoside
					Cluster of Ciglitazone
					Triglochinin
					Austalide C
					GDP-4-Dehydro-6-L-deoxygalactose
					Fistuloside B
					Neobanol
					1,2,4,5,7-Pentathiocane
					Soyasaponin aa
					Betavulgaroside I
					MLS001142919-01!
					Pinnatifinoside A
					MLS001140787-01!(2S)-2-[[(2R)-2-[[1-[(2-methylpropan-2-yl)oxycarbonyl]-4-phenylpiperidine-4-carbonyl]amino]propanoyl]amino]-3-phenylpropanoic acid
					PS(18:2(9Z,12Z)/0:0)
					Aurasperone C
					PIP(16:1(9Z)/18:1(11Z))
					Methylene thiocyanate
					PE(22:1(13Z)/20:5(5Z,8Z,11Z,14Z,17Z))
					Berteroin
					Cluster of gamma- 12(13)-EpODE
					Picrocrocin
					18-nonadecynoic acid
					CDP-ribitol
					n-heptanoyl acetic acid
					Cluster of (±)-threo-1-(4-Hydroxyphenyl)-1,2,3-propanetriol
					Galactose
