# Supplementary material
Source: publisher figshare collection journal article supplement (https://tandf.figshare.com/articles/dataset/_/9798299)
Supplement: Supplementary file 3 [file 1 › Table S5 - Copy.xlsx]

## Sheet: Table S5
Table S5. Differential accumulation of selected metabolites with significant (p, q ≤ 0.05) quantities in control leaf (CL), control root (CR), salinity treated leaf (NL), salinity treated root (NR), salinity treatment with silicon leaf (NSiL), salinity treatment with silicon root (NSiR), silicon-treated leaf (SiL) and silicon-treated roots (SiR). Values are shown as the log10 of the precursor int…
Visible	Star	ID Score	Mass Accuracy Score	Isotopic Distribution Score	MS2 Score	XIC Score	Analyte Name	Accession Number	Molecular Formula	Molecular Weight	Retention Time (min)	ANOVA (Log10 Precursor Intensity) Comparison Level: Sample Biological Replicate Level: MS Sample	CL	CR	NL	NR	NSiL	NSiR	SiL	SiR
TRUE	Empty	0.996	0.99	1	1	0.79	Epicatechin	INCHIKEY:PFTAWBLQPZVEMU-UKRRQHHQSA-N	C 15H 14O 6	290.1	6.5	3.83389e-08	9.51526	8.93424	9.56098	M.V.	9.45301	9.14498	9.75013	8.75853
TRUE	Empty	0.982	1	1	0.97	0.76	nicotiflorin	INCHIKEY:RTATXGUCZHCSNG-QHWHWDPRSA-N	C 27H 30O 15	594.2	8.18	2.34024e-11	9.56707	7.3398	9.64686	M.V.	9.70815	M.V.	9.70567	-5.07095
TRUE	Empty	0.97	0.99	0.97	0.96	0.65	Glu-Leu	INCHIKEY:YBAFDPFAUTYYRW-YUMQZZPRSA-N	C 11H 20N 2O 5	260.1	7.82	1.09455e-06	8.2345	M.V.	8.46203	M.V.	8.44748	M.V.	8.73261	M.V.
TRUE	Empty	0.949	1	1	-	0.84	Symmetric dimethylarginine	INCHIKEY:HVPFXCBJHIIJGS-LURJTMIESA-N	C 8H 18N 4O 2	202.1	15.15	0.0467143	7.97065	8.12046	8.359	8.59855	8.67041	7.1219	8.20784	7.0913
TRUE	Empty	0.939	0.99	0.99	-	0.98	beta-cyano-L-alanine	INCHIKEY:OIVLITBTBDPEFK-UHFFFAOYSA-N	C 4H 6N 2O 2	114	8.95	0.00671749	8.82412	9.297	9.05354	9.20864	9.23289	9.12411	8.88084	9.10217
TRUE	Empty	0.939	0.99	0.99	-	0.29	Diketogulonic acid	INCHIKEY:GJQWCDSAOUMKSE-STHAYSLISA-N	C 6H 8O 7	192	8.48	4.60207e-05	8.24526	M.V.	7.35506	M.V.	6.90974	6.6303	7.87798	M.V.
TRUE	Empty	0.939	0.99	0.99	-	0.98	L-3-Cyanoalanine	INCHIKEY:BXRLWGXPSRYJDZ-YEQUQEJONA-N	C 4H 6N 2O 2	114	8.95	0.00671749	8.82412	9.297	9.05354	9.20864	9.23289	9.12411	8.88084	9.10217
TRUE	Empty	0.937	0.99	0.97	0.9	0.79	L-Asparagine	INCHIKEY:DCXYFEDJOCDNAF-REOHCLBHSA-N	C 4H 8N 2O 3	132.1	2.61	0.0188876	8.298	M.V.	8.55733	8.89889	8.36033	-8.37362	8.00096	8.65771
TRUE	Empty	0.937	0.99	0.99	-	0.06	Glucaric acid	INCHIKEY:DSLZVSRJTYRBFB-LLEIAEIESA-N	C 6H 10O 8	210	8.49	9.36371e-06	7.96629	M.V.	6.94203	M.V.	6.42983	6.47619	7.71347	M.V.
TRUE	Empty	0.937	0.99	0.99	-	0.06	Mucic acid	INCHIKEY:DSLZVSRJTYRBFB-DUHBMQHGSA-N	C 6H 10O 8	210	8.49	9.36371e-06	7.96629	M.V.	6.94203	M.V.	6.42983	6.47619	7.71347	M.V.
TRUE	Empty	0.936	0.99		-	0.69	S-Formylglutathione	INCHIKEY:FHXAGOICBFGEBF-BQBZGAKWSA-N	C 11H 17N 3O 7S	335.1	8	5.07265e-09	M.V.	8.52753	M.V.	8.27992	M.V.	7.89105	M.V.	8.74039
TRUE	Empty	0.935	0.99	0.98	-	0.75	Aspartyl-Glutamine	INCHIKEY:GSMPSRPMQQDRIB-UHFFFAOYSA-N	C 9H 15N 3O 6	261.1	8.96	0.00862185	7.87642	8.17815	10.3357	9.27882	9.4415	9.82912	7.69021	9.86167
TRUE	Empty	0.927	0.99	0.97	-	0.52	Bolusanthin	INCHIKEY:XCIMIGGTZKYBOR-UHFFFAOYSA-N	C 16H 14O 7	318.1	7.87	2.28339e-10	M.V.	8.99578	M.V.	6.89215	M.V.	-5.69226	M.V.	7.61694
TRUE	Empty	0.924	1	0.9	0.91	0.95	Myristic acid	INCHIKEY:TUNFSRHWOTWDNC-UHFFFAOYSA-N	C 14H 28O 2	228.2	15.06	5.9472e-08	8.61003	8.3503	M.V.	8.69616	6.57366	8.41878	8.44688	8.23131
TRUE	Empty	0.92	0.87	0.93	0.94	0.35	Pyridoxine	INCHIKEY:LXNHXLLTXMVWPM-UHFFFAOYSA-N	C 8H 11NO 3	169.1	2.19	2.20007e-08	6.13172	M.V.	6.94436	M.V.	7.26265	M.V.	7.04852	M.V.
TRUE	Empty	0.917	0.98	0.96	-	0.73	4-Coumaroylputrescine	INCHIKEY:CJHDBEPXEKGBDW-YVMONPNESA-N	C 13H 18N 2O 2	234.1	8.49	6.50099e-05	M.V.	M.V.	M.V.	8.28401	M.V.	M.V.	M.V.	M.V.
TRUE	Empty	0.916	0.99	0.96	-	0.01	4-Methylumbelliferyl .beta.-D-glucuronide	INCHIKEY:ARQXEQLMMNGFDU-JHZZJYKESA-N	C 16H 16O 9	352.1	3.25	5.64932e-08	M.V.	6.76859	M.V.	6.35476	M.V.	5.3831	M.V.	7.25096
TRUE	Empty	0.914	0.99	0.95	-	0.81	4-Aminobenzoic acid hydrazide	INCHIKEY:WPBZMCGPFHZRHJ-UHFFFAOYSA-N	C 7H 9N 3O	151.1	2	0.0458265	M.V.	M.V.	-9.09062	8.48565	-9.3951	8.36655	-7.59875	M.V.
TRUE	Empty	0.903	0.98	0.94	-	0.74	D-Histidine	INCHIKEY:HNDVDQJCIGZPNO-RXMQYKEDSA-N	C 6H 9N 3O 2	155.1	13.15	0.0427721	M.V.	M.V.	9.26055	M.V.	-8.57619	M.V.	-8.43977	M.V.
TRUE	Empty	0.895	0.84	1	-	0.23	2-Aminomuconic acid	INCHIKEY:ZRHONLCTYUYMIQ-HSFFGMMNSA-N	C 6H 7NO 4	157	5.96	1.7278e-05	M.V.	M.V.	7.22703	M.V.	7.62436	M.V.	5.37836	M.V.
TRUE	Empty	0.891	0.87	0.98	-	0.66	Phenylalanyl-Arginine	INCHIKEY:OZILORBBPKKGRI-UHFFFAOYSA-N	C 15H 23N 5O 3	321.2	2.05	0.00339477	M.V.	8.41921	8.47182	-7.69799	8.26668	M.V.	8.17268	M.V.
TRUE	Empty	0.887	0.88	0.97	-	0.83	Succinylacetone	INCHIKEY:WYEPBHZLDUPIOD-UHFFFAOYSA-N	C 7H 10O 4	158.1	5.8	0.000587217	M.V.	-8.33218	8.58775	9.28107	9.24473	9.08227	-8.01251	-7.74286
TRUE	Empty	0.881	0.99	0.99	0.77	0.29	CITRATE	INCHIKEY:KRKNYBCHXYNGOX-UHFFFAOYSA-N	C 6H 8O 7	192	8.48	4.60207e-05	8.24526	M.V.	7.35506	M.V.	6.90974	6.6303	7.87798	M.V.
TRUE	Empty	0.871	0.9	0.93	-	0.54	Glutamyl-Phenylalanine	INCHIKEY:NYBBODHIFBLFMJ-UHFFFAOYNA-N	C 11H 19NO 8	293.1	4.36	0.000318922	-5.25162	5.56003	8.55335	-7.87244	8.64644	M.V.	M.V.	M.V.
TRUE	Empty	0.869	0.85	0.35	-	0.72	L-Pinitol	INCHIKEY:DSCFFEYYQKSRSV-FQGZZYRYSA-N	C 7H 14O 6	194.1	5.16	0.453345	8.59127	M.V.	7.99462	6.58657	-8.7671	7.8853	6.85013	M.V.
TRUE	Empty	0.869	0.85	0.35	-	0.72	(-)-Bornesitol	INCHIKEY:DSCFFEYYQKSRSV-FQGZZYRYSA-N	C 7H 14O 6	194.1	5.16	0.453345	8.59127	M.V.	7.99462	6.58657	-8.7671	7.8853	6.85013	M.V.
TRUE	Empty	0.864	0.81	0.97	-	0.71	Salicylic acid beta-D-glucoside	INCHIKEY:TZPBMNKOLMSJPF-UHFFFAOYNA-N	C 13H 16O 8	300.1	7.93	5.34391e-09	6.36963	M.V.	8.13401	M.V.	8.3847	M.V.	-5.71082	M.V.
TRUE	Empty	0.864	0.78	0.94	0.84	0.76	Sakuranetin	INCHIKEY:DJOJDHGQRNZXQQ-AWEZNQCLSA-N	C 16H 14O 5	286.1	9.85	0.000128701	8.69646	M.V.	8.81092	M.V.	9.01824	-5.79428	8.8961	-7.60542
TRUE	Empty	0.861	0.97	0.88	-	0.09	L-gamma-glutamyl-L-leucine	INCHIKEY:MYFMARDICOWMQP-UHFFFAOYSA-N	C 11H 20N 2O 5	260.1	6.87	0.00750628	7.4641	M.V.	6.57226	M.V.	7.56695	M.V.	M.V.	M.V.
TRUE	Empty	0.845	0.99	0.85	-	0.21	Decoyinine	INCHIKEY:UZSSGAOAYPICBZ-SOCHQFKDSA-N	C 11H 13N 5O 4	279.1	5.51	0.0212526	M.V.	M.V.	7.75881	6.43177	8.01481	M.V.	M.V.	M.V.
TRUE	Empty	0.834	0.88	0.88	-	0.26	Gamma-Glutamyltyrosine	INCHIKEY:VVLXCWVSSLFQDS-QWRGUYRKSA-N	C 14H 18N 2O 6	310.1	5.87	0.000564359	M.V.	6.46785	M.V.	6.3491	M.V.	8.64359	M.V.	8.32241
TRUE	Empty	0.823	0.81	0.91	-	0.43	Asparaginyl-Arginine	INCHIKEY:JSLGXODUIAFWCF-UHFFFAOYSA-N	C 10H 20N 6O 4	288.2	11.39	0.0328527	-7.63256	8.45592	M.V.	M.V.	M.V.	M.V.	M.V.	M.V.
TRUE	Empty	0.817	0.72	0.94	-	0.2	Glepidotin C	INCHIKEY:NOPHUFYTJFIALJ-UHFFFAOYSA-N	C 19H 22O 3	298.2	9.45	8.2211e-07	7.24589	7.56886	6.31708	7.50479	6.31221	7.59985	6.15944	7.4972
TRUE	Empty	0.81	0.59	0.99	-	0.07	Boldine	INCHIKEY:LZJRNLRASBVRRX-UHFFFAOYSA-N	C 19H 21NO 4	327.1	8.56	0.023066	-7.64608	6.65729	M.V.	M.V.	-7.70934	6.7839	-7.51246	7.93325
TRUE	Empty	0.806	0.88	0.84	-	0.65	Allithiamine	INCHIKEY:WNCAVNGLACHSRZ-SDNWHVSQSA-N	C 15H 22N 4O 2S 2	354.1	8.38	4.9876e-08	9.48878	8.72334	9.28361	-5.76291	9.34461	8.17322	9.89772	9.79091
TRUE	Empty	0.798	0.82	0.86	-	0.05	Glyceollidin I	INCHIKEY:NLHMQOCIFRDSNU-UHFFFAOYSA-N	C 20H 20O 5	340.1	2.51	0.0269411	M.V.	-5.97122	M.V.	M.V.	M.V.	8.35818	M.V.	7.88131
TRUE	Empty	0.79	0.82	0.85	-	0.48	Arginyl-Asparagine	INCHIKEY:JSLGXODUIAFWCF-UHFFFAOYSA-N	C 10H 20N 6O 4	288.2	2.08	0.015244	7.99026	8.40207	M.V.	-7.64955	7.90911	M.V.	-8.45621	M.V.
TRUE	Empty	0.784	1	0.66	0.46	0.66	2-Oxoarginine	INCHIKEY:ARBHXJXXVVHMET-UHFFFAOYSA-N	C 6H 11N 3O 3	173.1	8.86	4.21582e-08	M.V.	M.V.	M.V.	M.V.	8.00907	M.V.	M.V.	M.V.
TRUE	Empty	0.784	1	0.66	-	0.66	4-Imidazolone-5-propionic acid	INCHIKEY:HEXMLHKQVUFYME-UHFFFAOYSA-N	C 6H 8N 2O 3	156.1	8.86	4.21582e-08	M.V.	M.V.	M.V.	M.V.	8.00907	M.V.	M.V.	M.V.
TRUE	Empty	0.761	0.52	0.95	-	0.27	Paromomycin	INCHIKEY:UOZODPSAJZTQNH-LSWIJEOBSA-N	C 23H 45N 5O 14	615.3	8.58	0.0474302	7.17676	-6.98175	7.14311	M.V.	7.06116	6.87558	6.52991	7.19217
TRUE	Empty	0.751	0.69	0.86	-	0.21	Phenylalanyl-Methionine	INCHIKEY:PYOHODCEOHCZBM-UHFFFAOYSA-N	C 14H 20N 2O 3S	296.1	5.51	0.0212526	M.V.	M.V.	7.75881	6.43177	8.01481	M.V.	M.V.	M.V.
TRUE	Empty	0.745	0.99	0.99	0.3	0.29	Isocitric acid	INCHIKEY:ODBLHEXUDAPZAU-UHFFFAOYSA-N	C 6H 8O 7	192	8.48	4.60207e-05	8.24526	M.V.	7.35506	M.V.	6.90974	6.6303	7.87798	M.V.
TRUE	Empty	0.736	1	0.31	0.93	0.68	Salicylic acid	INCHIKEY:YGSDEFSMJLZEOE-UHFFFAOYSA-N	C 7H 6O 3	138	3.27	1.70897e-08	M.V.	7.30735	M.V.	7.35186	M.V.	7.14608	M.V.	7.64689
TRUE	Empty	0.732	0.6	0.82	0.72	0.73	Ala-Gly-Ala	INCHIKEY:ZVFVBBGVOILKPO-UHFFFAOYSA-N	C 8H 15N 3O 4	217.1	8.49	6.50099e-05	M.V.	M.V.	M.V.	8.28401	M.V.	M.V.	M.V.	M.V.
TRUE	Empty	0.729	0.54	0.86	0.06	0.91	Phthalic acid	INCHIKEY:XNGIFLGASWRNHJ-UHFFFAOYSA-N	C 8H 6O 4	166	6.36	0.000843278	M.V.	8.05034	M.V.	M.V.	8.26467	M.V.	M.V.	M.V.
TRUE	Empty	0.729	0.54	0.86	0.17	0.91	Terephthalic acid	INCHIKEY:KKEYFWRCBNTPAC-UHFFFAOYSA-N	C 8H 6O 4	166	6.36	0.000843278	M.V.	8.05034	M.V.	M.V.	8.26467	M.V.	M.V.	M.V.
TRUE	Empty	0.721	1	0.66	-	0.66	Imidazolelactic acid	INCHIKEY:JTYMXXCJQKGGFG-UHFFFAOYSA-N	C 6H 8N 2O 3	156.1	8.86	4.21582e-08	M.V.	M.V.	M.V.	M.V.	8.00907	M.V.	M.V.	M.V.
TRUE	Empty	0.713	0.6	0.82	-	0.73	N-a-Acetylcitrulline	INCHIKEY:HJCMDXDYPOUFDY-UHFFFAOYSA-N	C 8H 15N 3O 4	217.1	8.49	6.50099e-05	M.V.	M.V.	M.V.	8.28401	M.V.	M.V.	M.V.	M.V.
TRUE	Empty	0.707	0.9	0.69	-	0.32	Glutamyl-Tyrosine	INCHIKEY:YSWHPLCDIMUKFE-UHFFFAOYSA-M	C 14H 17N 2O 6	309.1	5.57	0.049652	M.V.	M.V.	8.16509	-7.33442	8.63792	M.V.	-5.21898	M.V.
TRUE	Empty	0.704	0.56	0.95	0.59	0.65	Cepharanthine	INCHIKEY:YVPXVXANRNDGTA-FQLXRVMXSA-N	C 37H 38N 2O 6	606.3	19.64	1.68069e-07	-8.18518	-7.43836	8.94885	M.V.	9.19288	M.V.	9.01717	M.V.
TRUE	Empty	0.701	0.6	0.82	-	0.73	Alanyl-Glutamine	INCHIKEY:HJCMDXDYPOUFDY-UHFFFAOYSA-N	C 8H 15N 3O 4	217.1	8.49	6.50099e-05	M.V.	M.V.	M.V.	8.28401	M.V.	M.V.	M.V.	M.V.
