# Supplementary material
Source: publisher figshare collection journal article supplement (https://tandf.figshare.com/articles/dataset/_/9798299)
Supplement: Supplementary file 3 [file 1 › Table S6 - Copy.xlsx]

## Sheet: Table S6
Table S6. Differentially accumulated metabolites under salinity with significant (p, q ≤ 0.05) quantities in control leaf (CL) and salinity treated leaf (NL). Values are shown as the log10 of the precursor intensity. M.V. refers to the missing values of MS data.
#	Visible	Star	ID Score	Mass Accuracy Score	Isotopic Distribution Score	MS2 Score	XIC Score	Analyte Name	Accession Number	Molecular Formula	Molecular Weight	Retention Time (min)	t-test (Log10 Precursor Intensity) Comparison Level: Sample Biological Replicate Level: MS Sample	CL	NL
1	TRUE	Empty	1	1	1	-	0.55	7E,9Z,12Z-octadecatrienoic acid	INCHIKEY:RTILLKWKMLNKLK-JSHIYTDESA-N	C 18H 30O 2	278.2	10.06	0.0273386	10.1052	10.4834
2	TRUE	Empty	0.997	1	1	1	0.51	Linoleic acid	INCHIKEY:OYHQOLUKZRVURQ-HZJYTTRNSA-N	C 18H 32O 2	280.2	10.28	0.0187599	10.1103	10.2904
3	TRUE	Empty	0.995	0.98	1	1	0.9	Epicatechin	INCHIKEY:PFTAWBLQPZVEMU-UKRRQHHQSA-N	C 15H 14O 6	290.1	6.65	0.0338346	9.56206	-8.71032
4	TRUE	Empty	0.995	1	1	0.99	0.86	FA 18:0	INCHIKEY:QIQXTHQIDYTFRH-UHFFFAOYSA-N	C 18H 36O 2	284.3	19.97	0.000184896	7.9291	8.92569
5	TRUE	Empty	0.99	0.99	0.99	0.99	0.92	Phenylalanine	INCHIKEY:COLNVLDHVKWLRT-UHFFFAOYSA-N	C 9H 11NO 2	165.1	3.28	0.00813216	-8.36175	9.29907
6	TRUE	Empty	0.989	0.99	1	0.98	0.98	Catechin	INCHIKEY:PFTAWBLQPZVEMU-DZGCQCFKSA-N	C 15H 14O 6	290.1	7.64	0.0453027	10.151	-9.40391
7	TRUE	Empty	0.989	1	1	0.98	0.38	lysoPC 18:2	INCHIKEY:AXFAVZQXPFQIEI-IXPSVHCVNA-N	C 26H 50NO 7P	519.3	11.99	0.0382634	7.4536	7.65748
8	TRUE	Empty	0.988	1	0.99	0.98	0.92	Tryptophan	INCHIKEY:QIVBCDIJIAJPQS-UHFFFAOYSA-N	C 11H 12N 2O 2	204.1	5.21	0.117877	8.60458	8.85525
9	TRUE	Empty	0.985	1	0.97	0.99	0.88	Adenine	INCHIKEY:GFFGJBXGBJISGV-UHFFFAOYSA-N	C 5H 5N 5	135.1	4.21	0.0405686	9.32009	9.44754
10	TRUE	Empty	0.978	0.98	0.99	0.97	0.12	URIDINE 5'-DIPHOSPHOGALACTOSE	INCHIKEY:HSCJRCZFDFQWRP-UHFFFAOYSA-N	C 15H 24N 2O 17P 2	566.1	9.1	0.00264927	6.9001	M.V.
11	TRUE	Empty	0.972	0.99	1	0.95	0.37	8,11,14-Eicosatriynoic acid	INCHIKEY:QLLIWTBTVOPGCM-UHFFFAOYSA-N	C 20H 28O 2	300.2	9.19	0.0355217	6.90714	-5.7323
12	TRUE	Empty	0.968	1	0.97	0.96	0.7	NEPSILON,NEPSILON,NEPSILON-TRIMETHYLLYSINE	INCHIKEY:MXNRLFUSFKVQSK-UHFFFAOYSA-N	C 9H 20N 2O 2	188.2	2.06	0.00460306	7.69222	8.03879
13	TRUE	Empty	0.966	1	1	0.93	0.76	Procyanidin C1	INCHIKEY:MOJZMWJRUKIQGL-CGFIDGTHSA-N	C 45H 38O 18	866.2	6.44	0.00421125	8.88063	8.62636
14	TRUE	Empty	0.952	1	0.99	0.91	0.83	Pheophorbide a	INCHIKEY:NSFSLUUZQIAOOX-QEWKCGBTSA-N	C 35H 36N 4O 5	592.3	12.13	0.0153311	9.26003	9.77348
15	TRUE	Empty	0.949	1	1	-	0.84	Symmetric dimethylarginine	INCHIKEY:HVPFXCBJHIIJGS-LURJTMIESA-N	C 8H 18N 4O 2	202.1	15.15	0.0467143	7.97065	8.359
16	TRUE	Empty	0.948	1	1	-	0.62	1,7-Dimethylguanosine	INCHIKEY:AISVAXNALHBFPC-IOSLPCCCSA-N	C 12H 17N 5O 5	311.1	3.22	0.0398568	8.37492	9.23613
17	TRUE	Empty	0.946	0.99	1	-	0.33	8E-Tetradecenyl acetate	INCHIKEY:VZGHIFSDFDWSOD-BQYQJAHWSA-N	C 16H 30O 2	254.2	9.97	0.0101607	8.83278	9.04483
18	TRUE	Empty	0.946	1	0.99	-	0.06	Benzyl O-[arabinofuranosyl-(1->6)-glucoside]	INCHIKEY:VLAZYPZGDJXPDY-UHFFFAOYNA-N	C 18H 26O 10	402.2	6.4	0.00528957	8.78552	-7.45187
19	TRUE	Empty	0.946	1	0.99	-	0.9	D-Glucaro-1,4-lactone	INCHIKEY:XECPAIJNBXCOBO-FSWKPHNMNA-N	C 6H 8O 7	192	7.28	0.00240311	8.41061	-6.23022
20	TRUE	Empty	0.946	1	1	-	0.57	TR-Saponin A	INCHIKEY:VXQCKKNUNHNYPF-KBZHBASMNA-N	C 52H 78O 20	1022.5	11.79	0.0432591	8.08129	8.26834
21	TRUE	Empty	0.945	1	0.99	-	0.64	Hydroxysepiapterin	INCHIKEY:QHNIUIKIRXYAAW-BYPYZUCNSA-N	C 9H 11N 5O 4	253.1	4.69	0.035855	8.31793	9.18961
22	TRUE	Empty	0.944	1	0.99	-	0.01	Mayolene-18	INCHIKEY:RFJCITQJURPJMT-INOIBKDBSA-N	C 36H 64O 4	560.5	10.33	0.00624187	8.36326	8.65222
23	TRUE	Empty	0.943	1	0.99	-	0.6	cis-4-Carboxymethylenebut-2-en-4-olide	INCHIKEY:AYFXPGXAZMFWNH-ONEGZZNKSA-N	C 6H 4O 4	140	8.06	0.0238966	M.V.	9.25938
24	TRUE	Empty	0.943	0.99		-	0.01	NCGC00380211-01!10-[6-[[3,5-dihydroxy-4-(3,4,5-trihydroxyoxan-2-yl)oxyoxan-2-yl]oxymethyl]-3,4-dihydroxy-5-(3,4,5-trihydroxyoxan-2-yl)oxyoxan-2-yl]oxy-1,6a,6b,9,9,12a-hexamethyl-2-methylidene-1,3,4,5,6,6a,7,8,8a,10,11,12,13,14b-tetradecahydropicene-4a-carboxylic acid	INCHIKEY:QSBIUKCZJBBYIL-UHFFFAOYSA-N	C 51H 80O 20	1012.5	11.54	0.0177173	6.35987	8.17401
25	TRUE	Empty	0.943	0.98	1	-	0.09	Phenethyl rutinoside	INCHIKEY:OKUGUNDXBGUFPA-UHFFFAOYNA-N	C 20H 30O 10	430.2	7.8	0.00863413	7.73676	7.08221
26	TRUE	Empty	0.942	0.99	0.99	-	0.77	2,3-Methyleneglutaric acid	INCHIKEY:YNNMOGWGBFSMGB-UHFFFAOYSA-N	C 7H 8O 4	156	8.33	0.03279	8.27682	7.76996
27	TRUE	Empty	0.942	0.98	1	-	0.52	Avocadene 2-acetate	INCHIKEY:LUIGTZGBXWZJAX-UHFFFAOYNA-N	C 19H 36O 4	328.3	15.78	0.0330644	8.3645	8.46641
28	TRUE	Empty	0.942	0.98	1	-	0.56	trans-4-Carboxymethylenebut-2-en-4-olide	INCHIKEY:AYFXPGXAZMFWNH-ARJAWSKDSA-N	C 6H 4O 4	140	8.09	0.00455518	9.43089	8.51813
29	TRUE	Empty	0.941	0.98	1	-	0.03	1,2,3,4-Tetra-O-acetyl-.beta.-D-glucopyranose	INCHIKEY:FEQXFAYSNRWXDW-RKQHYHRCSA-N	C 14H 20O 10	348.1	8.36	0.0226278	8.78516	7.43955
30	TRUE	Empty	0.941	0.98	1	-	0.17	alpha-Hydroxymetoprolol	INCHIKEY:OFRYBPCSEMMZHR-UHFFFAOYNA-N	C 15H 25NO 4	283.2	9.92	0.00844747	8.17159	8.41895
31	TRUE	Empty	0.941	0.99	0.99	-	0.06	gamma- 12(13)-EpODE	INCHIKEY:TVHXKPMFCYEQTM-YMVJEYMASA-N	C 18H 30O 3	294.2	8.91	0.0334349	8.662	8.98183
32	TRUE	Empty	0.939	0.99	0.99	-	0.29	2,3-Diketo-L-gulonate	INCHIKEY:GJQWCDSAOUMKSE-SCQFTWEKSA-N	C 6H 8O 7	192	8.48	0.0375259	8.34385	7.50375
33	TRUE	Empty	0.938	1	0.98	-	0.57	(9R,10S,12Z)-9,10-Dihydroxy-8-oxo-12-octadecenoic acid	INCHIKEY:NIOKCFABUMZUDL-RMKNXTFCNA-N	C 18H 32O 5	328.2	6.15	0.00959447	8.97009	9.19308
34	TRUE	Empty	0.938	1	0.98	-	0.06	11:0(10Me,10Me)	INCHIKEY:VYDBDDDTZMNNMM-UHFFFAOYSA-N	C 13H 26O 2	214.2	8.94	0.0210889	6.29312	M.V.
35	TRUE	Empty	0.938	0.97	1	-	0.04	18-methyl-8Z,11Z,14Z-nonadecatrienoic acid	INCHIKEY:RKNDDVGTINXHOO-FSBKEEGASA-N	C 20H 34O 2	306.3	10.87	0.0153225	6.98647	7.48011
36	TRUE	Empty	0.938	1	0.98	0.89	0.08	NCGC00384922-01!(2R,3R,4S,5S,6R)-2-octoxy-6-[[(2S,3R,4S,5R)-3,4,5-trihydroxyoxan-2-yl]oxymethyl]oxane-3,4,5-triol	INCHIKEY:IBSNNVHJJNLMJW-BMVMOQKNSA-N	C 19H 36O 10	424.2	8.14	0.00159618	7.95394	7.10867
37	TRUE	Empty	0.937	0.98	0.99	-	0.11	3,7-Dimethyl-5-octene-1,7-diol 1-glucoside	INCHIKEY:ZCDKJIRLFSPIQI-QPJJXVBHNA-N	C 16H 30O 7	334.2	11.65	0.0446488	8.20425	7.11517
38	TRUE	Empty	0.937	0.99	0.99	-	0.67	D-glycero-L-galacto-Octulose	INCHIKEY:HYWDXGGHANXDIV-UHFFFAOYNA-N	C 8H 16O 8	240.1	6.5	0.00284132	8.35676	-7.25186
39	TRUE	Empty	0.937	0.99	0.99	-	0.08	Etherolenic acid	INCHIKEY:QWRJRLCIDLDGLM-GTTHPXIQSA-N	C 18H 28O 3	292.2	8.5	0.0257079	8.86518	9.15502
40	TRUE	Empty	0.937	0.98	0.99	-	0.29	Quinic acid	INCHIKEY:AAWZDTNXLSGCEK-RKGSPJAZSA-N	C 7H 12O 6	192.1	6.99	0.00052136	7.89931	-6.415
41	TRUE	Empty	0.937	1	0.98	-	0.58	Viscumiside A	INCHIKEY:KZQCCKUDYVSOLC-UHFFFAOYSA-N	C 22H 24O 11	464.1	8.43	0.00810846	8.09772	-6.40386
42	TRUE	Empty	0.936	0.97	0.99	-	0.29	6,10,14-Trimethyl-5,9,13-pentadecatrien-2-one	INCHIKEY:LTUMRKDLVGQMJU-HSVQFRAPSA-N	C 18H 30O	262.2	15.77	0.230956	8.38588	8.29348
43	TRUE	Empty	0.936	0.99	0.98	-	0.61	Ascorbyl stearate	INCHIKEY:LITUBCVUXPBCGA-UHFFFAOYSA-N	C 24H 42O 7	442.3	14.09	0.0116899	8.63064	9.06091
44	TRUE	Empty	0.936	0.99	0.98	-	0.17	Epicatechin-(2beta->7,4beta->6)-catechin	INCHIKEY:BEPYKTSNKZMROV-UHFFFAOYNA-N	C 30H 24O 12	576.1	7.69	0.0304368	7.4166	6.94411
45	TRUE	Empty	0.936	0.98	0.99	-	0.11	Harderoporphyrin	INCHIKEY:KECOXFKVIHSIBO-UJJXFSCMSA-N	C 35H 36N 4O 6	608.3	11.92	0.000560941	5.45417	7.65712
46	TRUE	Empty	0.935	0.98	0.99	-	0.14	7,8,2',4'-Tetrahydroxyisoflavone	INCHIKEY:MMEMQPVSEZVECO-UHFFFAOYSA-N	C 15H 10O 6	286	6.64	0.00508343	6.90935	7.31536
47	TRUE	Empty	0.935	0.99	0.98	-	0.75	Aspartyl-Glutamine	INCHIKEY:GSMPSRPMQQDRIB-UHFFFAOYSA-N	C 9H 15N 3O 6	261.1	8.96	0.0443693	8.0175	10.2721
48	TRUE	Empty	0.935	0.98	0.99	-	0.01	Dolichin B	INCHIKEY:LRCYZCCKRIVTHN-CMVHYPBASA-N	C 20H 20O 5	340.1	9.33	0.0392448	-5.89103	6.66568
49	TRUE	Empty	0.934	0.99	0.98	-	0.86	4-Methyloctyl acetate	INCHIKEY:DDCOSYUAKAARCK-UHFFFAOYSA-N	C 11H 22O 2	186.2	7.81	0.0102027	6.29051	M.V.
50	TRUE	Empty	0.933	0.99	0.98	-	0.8	Diethyldithiocarbamate	INCHIKEY:LMBWSYZSUOEYSN-UHFFFAOYSA-N	C 5H 11NS 2	149	10.82	0.0148226	7.71463	7.31048
51	TRUE	Empty	0.931	1	0.97	-	0.58	Methylmalonate	INCHIKEY:ZIYVHBGGAOATLY-UHFFFAOYSA-N	C 4H 6O 4	118	8.58	0.028288	8.70938	8.33329
52	TRUE	Empty	0.931	0.98	0.98	-	0.01	Naringenin 5,7-dimethyl ether 4'-O-xylosyl-(1->4)-arabinoside	INCHIKEY:SVNWACIHAFUKAJ-UHFFFAOYSA-N	C 27H 32O 13	564.2	7.95	0.00578607	7.88097	7.16654
53	TRUE	Empty	0.931	0.99	0.97	-	0.69	Orinapterin	INCHIKEY:LHQIJBMDNUYRAM-BBIVZNJYSA-N	C 9H 11N 5O 3	237.1	3.86	0.028105	8.30411	9.39451
54	TRUE	Empty	0.931	0.99	0.98	-	0.13	Quercetin 3-(2'''-galloylglucosyl)-(1->2)-alpha-L-arabinofuranoside	INCHIKEY:JPICQHQVPWZCIW-ZNFLAGFDSA-N	C 33H 32O 20	748.1	7.93	0.00237097	7.41927	-5.11526
55	TRUE	Empty	0.93	0.99	0.98	-	0.06	Hydroxytyrosol	INCHIKEY:JUUBCHWRXWPFFH-UHFFFAOYSA-N	C 8H 10O 3	154.1	7.97	0.000451493	8.09297	7.4469
56	TRUE	Empty	0.929	0.98		-	0	PI(17:2(9Z,12Z)/0:0)	INCHIKEY:CXHDGZFLVMVIOQ-NTXBIVQQSA-N	C 26H 47O 12P	582.3	8.24	0.0352619	5.78569	M.V.
57	TRUE	Empty	0.926	1	0.96	-	0.57	Acetyl-D-carnitine	INCHIKEY:RDHQFKQIGNGIED-QMMMGPOBSA-N	C 9H 17NO 4	203.1	19	0.000610616	8.96971	-5.6735
58	TRUE	Empty	0.926	1	0.96	-	0.56	Carthamidin	INCHIKEY:NPLTVGMLNDMOQE-UHFFFAOYSA-N	C 15H 12O 6	288.1	6.39	0.0440327	8.12469	7.66317
59	TRUE	Empty	0.924	0.99	0.97	-	0.37	L-Lyxonate	INCHIKEY:QXKAIJAYHKCRRA-UHFFFAOYNA-N	C 5H 10O 6	166	6.86	0.00301821	8.3074	7.53856
60	TRUE	Empty	0.924	1	0.9	0.91	0.95	Myristic acid	INCHIKEY:TUNFSRHWOTWDNC-UHFFFAOYSA-N	C 14H 28O 2	228.2	15.06	0.00206594	8.66401	M.V.
61	TRUE	Empty	0.923	0.99	0.97	-	0.04	cis-3-Hexenyl b-primeveroside	INCHIKEY:NVTNXPADRDASMP-ARJAWSKDNA-N	C 17H 30O 10	394.2	6.06	0.0486053	8.02328	7.66275
62	TRUE	Empty	0.92	0.99	0.96	-	0.09	Isolimocitrol 3-glucoside	INCHIKEY:AMJOONKCBORCKA-RYUWUWGTSA-N	C 24H 26O 14	538.1	2.74	0.0424817	7.81318	M.V.
63	TRUE	Empty	0.92	0.87	0.93	0.94	0.35	Pyridoxine	INCHIKEY:LXNHXLLTXMVWPM-UHFFFAOYSA-N	C 8H 11NO 3	169.1	2.19	0.0375213	6.15418	6.98026
64	TRUE	Empty	0.919	0.98	0.96	-	0.04	(2S)-2-Butanol O-[b-D-Apiofuranosyl-(1->6)-b-D-glucopyranoside]	INCHIKEY:DANFNCOJRRFMIO-UHFFFAOYNA-N	C 15H 28O 10	368.2	5.36	0.00234167	7.61441	6.94463
65	TRUE	Empty	0.916	0.95	0.97	-	0.79	Glucopyranosylmoranoline	INCHIKEY:GNVIYGFSOIHFHK-NIKVEEOSSA-N	C 12H 23NO 9	325.1	8.57	0.0125443	7.50795	8.22709
66	TRUE	Empty	0.913	0.99	0.95	-	0.72	NCGC00385847-01!1-(4-methoxyphenyl)propane-1,2-diol	INCHIKEY:MRDZSBVJWOXBRW-UHFFFAOYSA-N	C 10H 14O 3	182.1	5.79	0.0186505	8.63553	8.97815
67	TRUE	Empty	0.911	0.95	0.96	-	0.89	1,8-Octanedithiol	INCHIKEY:PGTWZHXOSWQKCY-UHFFFAOYSA-N	C 8H 18S 2	178.1	19.7	0.0288903	9.30194	9.12107
68	TRUE	Empty	0.909	0.96	0.96	-	0.82	2,4,6-Triethyl-1,3,5-oxadithiane	INCHIKEY:GQNYEPIOQFSEAZ-UHFFFAOYNA-N	C 9H 18OS 2	206.1	19.43	0.0493183	8.54263	M.V.
69	TRUE	Empty	0.906	0.89	0.99	-	0.09	(R)-lipoic acid	INCHIKEY:AGBQKNBQESQNJD-UHFFFAOYNA-N	C 8H 14O 2S 2	206	7.98	0.0301967	8.72614	7.37163
70	TRUE	Empty	0.906	0.97	0.95	-	0.08	Dinoravicholic acid	INCHIKEY:UWRHWTPWCRRHDI-ZKTFRNAESA-N	C 22H 36O 5	380.3	15.67	0.0439411	6.34464	7.28229
71	TRUE	Empty	0.903	0.88	0.99	-	0.52	Muramic acid	INCHIKEY:MSFSPUZXLOGKHJ-LEISLEKSSA-N	C 9H 17NO 7	251.1	4.54	0.00209146	5.6719	8.46801
72	TRUE	Empty	0.902	0.92	0.97	-	0	L-phenylalanyl-L-proline	INCHIKEY:WEQJQNWXCSUVMA-UHFFFAOYSA-N	C 14H 18N 2O 3	262.1	4.75	0.0292295	7.00194	7.44408
73	TRUE	Empty	0.899	0.88	0.98	-	0.48	Glu-Thr-Arg	INCHIKEY:TWYSSILQABLLME-UHFFFAOYSA-N	C 15H 28N 6O 7	404.2	7.95	0.0360832	6.59274	7.38495
74	TRUE	Empty	0.895	0.84	1	-	0.23	2-Aminomuconic acid	INCHIKEY:ZRHONLCTYUYMIQ-HSFFGMMNSA-N	C 6H 7NO 4	157	5.96	1.7278e-05	M.V.	7.22703
75	TRUE	Empty	0.888	0.86	0.98	-	0.84	3-oxopimelic acid	INCHIKEY:IYNRULSFFKEOLT-UHFFFAOYSA-N	C 7H 10O 5	174.1	19.56	0.00375699	8.61317	-7.53519
76	TRUE	Empty	0.887	0.61	0.99	0.91	0.31	Desmethylverapamil	INCHIKEY:CAAKRPRWCVWYAO-UHFFFAOYSA-N	C 26H 36N 2O 4	440.3	14.42	0.026298	7.44556	8.00423
77	TRUE	Empty	0.887	0.88	0.97	-	0.83	Succinylacetone	INCHIKEY:WQEXBUQDXKPVHR-SNAWJCMRSA-N	C 7H 10O 4	158.1	5.8	0.000587217	M.V.	8.58775
78	TRUE	Empty	0.883	0.98	0.91	-	0.1	Cinnamtannin A2	INCHIKEY:QFLMUASKTWGRQE-AEGPMQOXNA-N	C 60H 50O 24	1154.3	6.63	0.00930703	7.86737	6.8044
79	TRUE	Empty	0.883	0.83	0.99	-	0.17	Ile-Ile-Arg	INCHIKEY:KYLIZSDYWQQTFM-UHFFFAOYSA-N	C 18H 36N 6O 4	400.3	15.62	0.00854334	7.99958	7.95368
80	TRUE	Empty	0.882	0.86	0.97	-	0.57	Epitestosterone sulfate	INCHIKEY:WAQBISPOEAOCOG-FZPSTPAASA-N	C 19H 28O 5S	368.2	6.3	0.00422108	7.4069	-6.18308
81	TRUE	Empty	0.88	0.94	0.92	-	0.83	1-Isothiocyanato-7-(methylthio)heptane	INCHIKEY:LDIRGNDMTOGVRB-UHFFFAOYSA-N	C 9H 17NS 2	203.1	18.69	0.000677516	8.81209	-7.30459
82	TRUE	Empty	0.88	0.94	0.92	-	0.4	rhodexin A	INCHIKEY:HFMLTKBZNAPPNY-CEKKCSHUSA-N	C 29H 44O 9	536.3	12.5	0.0142264	8.06599	7.79984
83	TRUE	Empty	0.874	1	0.89	-	0.83	3-Methyl-3H-imidazo[4,5-f]quinoxalin-2-amine	INCHIKEY:HKZZYGFWIFKKIR-UHFFFAOYSA-N	C 10H 9N 5	199.1	19.73	0.00379412	8.49742	-7.41075
84	TRUE	Empty	0.871	0.83	0.97	-	0.3	Aloe emodin w-acetate	INCHIKEY:FUECAILUKAJTBR-UHFFFAOYSA-N	C 17H 12O 6	312.1	6.77	0.00255817	6.26553	8.11729
85	TRUE	Empty	0.871	0.9	0.93	-	0.54	Glutamyl-Phenylalanine	INCHIKEY:NYBBODHIFBLFMJ-UHFFFAOYNA-N	C 11H 19NO 8	293.1	4.36	0.00321996	-5.45205	8.6214
86	TRUE	Empty	0.869	0.99	0.88	-	0	Licoricesaponin C2	INCHIKEY:WPDHECQXVOACTR-SVTLYNKKNA-N	C 42H 62O 15	806.4	9.09	0.0287692	6.34918	M.V.
87	TRUE	Empty	0.866	0.97	0.89	-	0.72	3alpha,12alpha-Dihydroxy-5beta-chola-7,9(11)-dien-24-oic Acid	INCHIKEY:MHMJDFLOHGJHIJ-UMNDTTGPSA-N	C 24H 36O 4	388.3	12.77	0.000919549	-6.68214	8.30957
88	TRUE	Empty	0.865	0.76	0.99	-	0.49	2-Phenylethyl beta-D-glucopyranoside	INCHIKEY:MLRIJUWUQTVDQE-UHFFFAOYNA-N	C 14H 20O 6	284.1	3.03	0.03185	M.V.	8.43304
89	TRUE	Empty	0.865	0.76	0.99	-	0.43	3-Hydroxy-1-phenyl-1-hexadecanone	INCHIKEY:BHJLLBCJOQXMIH-UHFFFAOYNA-N	C 22H 36O 2	332.3	16.18	0.000865204	8.15755	-6.82677
90	TRUE	Empty	0.864	0.81	0.97	-	0.71	Dimethyl fukiic acid	INCHIKEY:QHQANDJGWIVAAC-UHFFFAOYNA-N	C 13H 16O 8	300.1	7.93	0.00846416	6.55228	8.24364
91	TRUE	Empty	0.864	0.88	0.93	-	0.36	Galiposin	INCHIKEY:AFLGTFMAMFQGGU-GHXNOFRVSA-N	C 17H 12O 6	312.1	6.68	0.0117466	8.12825	M.V.
92	TRUE	Empty	0.864	0.81	0.97	-	0.71	Salicylic acid beta-D-glucoside	INCHIKEY:TZPBMNKOLMSJPF-UHFFFAOYNA-N	C 13H 16O 8	300.1	7.93	5.34391e-09	6.36963	8.13401
93	TRUE	Empty	0.862	1	0.87	-	0.8	beta-(2-Methoxyphenoxy)-lactic acid	INCHIKEY:MXVBBOLVTSAHEX-UHFFFAOYNA-N	C 10H 12O 5	212.1	2.05	0.00424409	8.11494	8.6239
94	TRUE	Empty	0.86	0.93	0.9	-	0	2-O-Acetylarbutin	INCHIKEY:QLDACILJKOVPDG-UHFFFAOYNA-N	C 14H 18O 8	314.1	2.03	0.0238854	6.01943	7.01473
95	TRUE	Empty	0.847	0.99	0.85	-	0.7	Bovolide	INCHIKEY:MTQPZHNZYWAXEH-JXMROGBWSA-N	C 11H 16O 2	180.1	3.05	0.0229764	-8.20813	9.15975
96	TRUE	Empty	0.846	0.71	0.99	-	0.51	3-(4-Hydroxy-3-methoxyphenyl)-2-methylpropionic acid	INCHIKEY:XUQXZROVMZNKPO-UHFFFAOYNA-N	C 11H 14O 4	210.1	3.85	0.0357006	M.V.	8.97508
97	TRUE	Empty	0.845	0.99	0.85	-	0.21	Decoyinine	INCHIKEY:UZSSGAOAYPICBZ-SOCHQFKDSA-N	C 11H 13N 5O 4	279.1	5.51	0.0212526	M.V.	7.75881
98	TRUE	Empty	0.845	0.78	0.95	-	0	Erysothiopine	INCHIKEY:HNDYDGVKLJMGCM-UHFFFAOYSA-N	C 19H 21NO 7S	407.1	6.43	0.0360835	7.56925	7.07474
99	TRUE	Empty	0.843	0.98	0.85	-	0.67	Pymetrozin	INCHIKEY:QHMTXANCGGJZRX-WUXMJOGZSA-N	C 10H 11N 5O	217.1	6.47	0.0186342	8.89341	-7.93162
100	TRUE	Empty	0.839	0.89	0.89	-	0.33	Dihydro-2,4,6-tris(2-methylpropyl)-4h-1,3,5-dithiazine	INCHIKEY:RQGPQWUKHADVPF-UHFFFAOYNA-N	C 15H 31NS 2	289.2	15.33	0.00259696	M.V.	8.78965
101	TRUE	Empty	0.837	0.98	0.71	0.87	0.69	2,2,4-Trimethyl-1,3-pentadienol diisobutyrate	INCHIKEY:OMVSWZDEEGIJJI-UHFFFAOYNA-N	C 16H 30O 4	286.2	9.75	0.0241852	8.58175	-7.81852
102	TRUE	Empty	0.829	0.78	0.93	-	0.05	Resolvin E1	INCHIKEY:AOPOCGPBAIARAV-OTBJXLELSA-N	C 20H 30O 5	350.2	6.15	0.0248785	7.20831	7.6376
103	TRUE	Empty	0.828	0.72	0.95	-	0.53	Eriodictyol 7,3'-dimethyl ether 4'-prenyl ether	INCHIKEY:QWIIYBSNKMRSLQ-UHFFFAOYSA-N	C 22H 24O 6	384.2	7.85	0.0492931	8.00495	6.80091
104	TRUE	Empty	0.826	0.83	0.9	-	0.79	1',2'-Dihydro-1,1'-dimethyl-2'-oxo-4,4'-bipyridinium(1+)	INCHIKEY:JJAUDUMTDBMCJW-UHFFFAOYSA-N	C 12H 13N 2O	201.1	19.6	0.00491416	8.3177	M.V.
105	TRUE	Empty	0.826	0.98	0.68	0.87	0.79	NCGC00385208-01!(2R,3R)-2-(2,6-dihydroxyphenyl)-3,5,7-trihydroxy-2,3-dihydrochromen-4-one	INCHIKEY:NBQYBZYBTNQEQG-LSDHHAIUSA-N	C 15H 12O 7	304.1	7.48	0.0254023	8.24852	6.7318
106	TRUE	Empty	0.824	0.63	1	-	0.42	PC(19:3(10Z,13Z,16Z)/0:0)	INCHIKEY:YWILQZMMAROEQS-MQIAJVHNSA-N	C 27H 50NO 7P	531.3	12.48	0.00360715	9.06647	8.81413
107	TRUE	Empty	0.817	0.72	0.94	-	0.2	Glepidotin C	INCHIKEY:NOPHUFYTJFIALJ-UHFFFAOYSA-N	C 19H 22O 3	298.2	9.45	0.00129155	7.28678	6.34261
108	TRUE	Empty	0.802	0.65	0.95	-	0.9	Diphenyl disulfide	INCHIKEY:GUUVPOWQJOLRAS-UHFFFAOYSA-N	C 12H 10S 2	218	8.38	0.0411726	6.06959	8.20888
109	TRUE	Empty	0.796	0.72	0.91	-	0.84	2-(Methylthiomethyl)-3-phenyl-2-propenal	INCHIKEY:QJDHQEQDIWDMOT-YRNVUSSQSA-N	C 11H 12OS	192.1	7.91	0.00766529	8.12905	8.97234
110	TRUE	Empty	0.795	0.6	0.97	-	0	Orcein	INCHIKEY:VPEASJIRGSVXBF-UHFFFAOYSA-N	C 28H 24N 2O 7	500.2	6.18	0.044804	6.8973	7.09995
111	TRUE	Empty	0.793	0.81	0.86	-	0.81	N-(2,5-Dihydroxyphenyl)pyridinium(1+)	INCHIKEY:BYQQTWROSPBRIU-UHFFFAOYSA-O	C 11H 10NO 2	188.1	19.05	1.33971e-06	8.63568	M.V.
112	TRUE	Empty	0.787	0.58	0.97	-	0	Pubescenol	INCHIKEY:DGMHVWLIESGCSH-UHFFFAOYNA-N	C 28H 42O 6	474.3	10.84	0.00934878	6.12659	M.V.
113	TRUE	Empty	0.783	0.67	0.92	-	0	Microcystin-YR	INCHIKEY:OWHASZQTEFAUJC-KHZAZHPGSA-N	C 52H 72N 10O 13	1044.5	10.68	0.00256311	-5.05951	7.32256
114	TRUE	Empty	0.782	0.52	0.99	-	0.33	7,12-Dimethylbenz[a]anthracene 5,6-oxide	INCHIKEY:HVGNLIKFFBYBQM-UHFFFAOYNA-N	C 20H 16O	272.1	4.47	3.26524e-05	8.62739	-5.81979
115	TRUE	Empty	0.782	0.83	0.83	-	0.77	L-Glutamic acid, dimethyl ester	INCHIKEY:YEJSPQZHMWGIGP-YFKPBYRVSA-N	C 7H 13NO 4	175.1	19.61	0.00837577	8.1469	M.V.
116	TRUE	Empty	0.777	0.71	0.88	-	0.58	Methyl 2,4,6-trihydroxybenzoate	INCHIKEY:AQDIJIAUYXOCGX-UHFFFAOYSA-N	C 8H 8O 5	184	8	0.0410509	5.69687	7.05838
117	TRUE	Empty	0.774	0.99	0.74	-	0.78	2-Carboxy-5,7-dimethyl-4-octanolide	INCHIKEY:FEFSWWMYJINUMK-UHFFFAOYNA-N	C 11H 18O 4	214.1	3.95	0.430629	9.11344	-8.70119
118	TRUE	Empty	0.768	0.93	0.76	-	0.01	Asperphenamate analogoue with additional glycine	INCHIKEY:OAWGMXFTWZTYNA-UHFFFAOYSA-N	C 34H 33N 3O 5	563.2	9.29	0.00131228	M.V.	7.35408
119	TRUE	Empty	0.751	0.69	0.86	-	0.21	Phenylalanyl-Methionine	INCHIKEY:PYOHODCEOHCZBM-UHFFFAOYSA-N	C 14H 20N 2O 3S	296.1	5.51	0.0212526	M.V.	7.75881
120	TRUE	Empty	0.747	0.73	0.83	-	0.78	Didymocalyxin B	INCHIKEY:SYJASFPLLHXQRX-VZZMMMTHSA-N	C 28H 22O 7	470.1	8.15	0.00022469	8.88751	8.1776
121	TRUE	Empty	0.747	0.53	0.93	-	0.06	N-arachidonoyl alanine	INCHIKEY:ZECSOKFEQQDUCP-GDYZQIPQSA-N	C 23H 37NO 3	375.3	16.3	0.0409663	6.50402	M.V.
122	TRUE	Empty	0.747	0.94	0.72	-	0.81	Pyrrolidino-[1,2E]-4H-2,4-dimethyl-1,3,5-dithiazine	INCHIKEY:OJEOXDLLIADRBL-UHFFFAOYNA-N	C 8H 15NS 2	189.1	19.86	0.0262392	8.60443	M.V.
123	TRUE	Empty	0.743	1	0.69	-	0.27	dehydro-D-arabinono-1,4-lactone	INCHIKEY:ZZZCUOFIHGPKAK-UWTATZPHSA-N	C 5H 6O 5	146	8.58	0.0140377	8.394	6.79957
124	TRUE	Empty	0.74	0.84	0.77	-	0.04	BIBR-1048 (Dabigatran)	INCHIKEY:KSGXQBZTULBEEQ-UHFFFAOYSA-N	C 34H 41N 7O 5	627.3	9.11	0.045772	8.24478	7.13768
125	TRUE	Empty	0.736	0.9	0.73	-	0.48	Ethyl propyl disulfide	INCHIKEY:SNGRPWPVGSSZGV-UHFFFAOYSA-N	C 5H 12S 2	136	6.7	0.000466839	7.9601	-5.89973
126	TRUE	Empty	0.726	0.58	0.87	-	0.2	1'-Acetoxyeugenol acetate	INCHIKEY:NKRBAUXTIWONOV-UHFFFAOYNA-N	C 14H 16O 5	264.1	8.11	0.027391	6.51986	7.35536
127	TRUE	Empty	0.72	0.77	0.77	-	0.02	PA 32:10	INCHIKEY:HOSKUVKVBYMDPG-GTVIMTKWNA-N	C 35H 49O 8P	628.3	9.2	0.031669	7.15888	M.V.
128	TRUE	Empty	0.712	0.68	0.8	-	0.83	2,2-Dihydroperoxypropane	INCHIKEY:XJHMOGCOFPLTNG-UHFFFAOYSA-N	C 3H 8O 4	108	19.99	0.0259502	9.01732	8.51405
129	TRUE	Empty	0.709	0.69	0.79	-	0.67	2,3-Diaminosalicylic acid	INCHIKEY:CGKSFNAGRBJNJO-UHFFFAOYSA-N	C 7H 8N 2O 3	168.1	8.83	0.00878923	-5.94405	8.10236
130	TRUE	Empty	0.708	0.75	0.76	-	0.69	2-(4-Methyl-5-thiazolyl)ethyl hexanoate	INCHIKEY:VJULDCZELAIZHC-UHFFFAOYSA-N	C 12H 19NO 2S	241.1	7.58	0.0414343	7.37764	-6.47534
131	TRUE	Empty	0.707	0.9	0.69	-	0.32	Glutamyl-Tyrosine	INCHIKEY:YSWHPLCDIMUKFE-UHFFFAOYSA-M	C 14H 17N 2O 6	309.1	5.57	0.049652	M.V.	8.16509
132	TRUE	Empty	0.704	0.56	0.95	0.59	0.65	Cepharanthine	INCHIKEY:YVPXVXANRNDGTA-FQLXRVMXSA-N	C 37H 38N 2O 6	606.3	19.64	0.0241348	-8.23998	9.00439
133	TRUE	Empty	0.703	0.51	0.87	-	0.47	Demexiptiline	INCHIKEY:SEDQWOMFMIJKCU-UHFFFAOYSA-N	C 18H 18N 2O	278.1	18.98	0.0280259	7.83249	M.V.
