# Supplementary material
Source: publisher figshare collection journal article supplement (https://tandf.figshare.com/articles/dataset/_/9798299)
Supplement: Supplementary file 3 [file 1 › Table S7 - Copy.xlsx]

## Sheet: TableS7
Table S7. Differentially accumulated metabolites under salinity with significant (p, q ≤ 0.05) quantities in control root (CR), salinity-treated root (NR). Values are shown as the log10 of the precursor intensity. M.V. refers to the missing values of MS data.
#	Visible	Star	ID Score	Mass Accuracy Score	Isotopic Distribution Score	MS2 Score	XIC Score	Analyte Name	Accession Number	Molecular Formula	Molecular Weight	Retention Time (min)	t-test (Log10 Precursor Intensity) Comparison Level: Sample Biological Replicate Level: MS Sample	CR	NR
1	TRUE	Empty	1	1	0.99	-	0.99	(R)-2-ethylmalic acid	INCHIKEY:YVYGHRNLPUMVBU-UHFFFAOYSA-N	C 6H 10O 5	162.1	8.25	0.0461709	9.40041	8.57928
2	TRUE	Empty	1	1	1	-	0.09	10R-HODE	INCHIKEY:XUDNDTZOWNNWHA-HLGVZOAESA-N	C 18H 32O 3	296.2	9.02	0.00480074	7.7381	6.95242
3	TRUE	Empty	1	1	1	-	0.97	3-O-Caffeoylshikimic acid	INCHIKEY:QMPHZIPNNJOWQI-RQOWECAXNA-N	C 16H 16O 8	336.1	7.92	0.0481224	11.2428	10.7667
4	TRUE	Empty	1	1	1	-	0.55	7E,9Z,12Z-octadecatrienoic acid	INCHIKEY:RTILLKWKMLNKLK-JSHIYTDESA-N	C 18H 30O 2	278.2	10.06	0.00710695	8.98068	8.64205
5	TRUE	Empty	1	1	0.99	-	0.68	ent-Gallocatechin 4'-methyl ether	INCHIKEY:ITDYPNOEEHONAH-HIFRSBDPSA-N	C 16H 16O 7	320.1	6.51	0.00720716	8.79029	7.57515
6	TRUE	Empty	1	0.99	0.97	-	0.81	Porric acid B	INCHIKEY:YRDAFVVZXCAVIU-UHFFFAOYSA-N	C 15H 12O 6	288.1	7.35	0.00038633	7.38802	-5.37084
7	TRUE	Empty	1	1	1	-	0.61	Robinetinidol-(4alpha->8)-catechin-(6->4alpha)-robinetinidol	INCHIKEY:QZNRDKYJASOYMZ-QBCCLPOMSA-N	C 45H 38O 18	866.2	7.09	0.00169893	M.V.	7.12968
8	TRUE	Empty	1	1	0.99	-	0.84	Squamolone	INCHIKEY:XYVMBSCIEDOIJQ-UHFFFAOYSA-N	C 5H 8N 2O 2	128.1	8.92	0.0221074	8.58581	8.95779
9	TRUE	Empty	0.998	1	1	1	0.31	LysoPC(18:1(9Z))	INCHIKEY:YAMUFBLWGFFICM-PTGWMXDISA-N	C 26H 52NO 7P	521.3	12.52	0.0385303	8.50005	8.13362
10	TRUE	Empty	0.997	1	1	1	0.1	Allantoic acid	INCHIKEY:NUCLJNSWZCHRKL-UHFFFAOYSA-N	C 4H 8N 4O 4	176.1	8.5	0.0267952	8.58521	7.20258
11	TRUE	Empty	0.997	1	1	1	0.51	Linoleic acid	INCHIKEY:OYHQOLUKZRVURQ-HZJYTTRNSA-N	C 18H 32O 2	280.2	10.28	0.000260189	9.48738	8.92922
12	TRUE	Empty	0.996	0.99	1	1	0.79	Epicatechin	INCHIKEY:PFTAWBLQPZVEMU-UKRRQHHQSA-N	C 15H 14O 6	290.1	6.5	0.0107772	8.86504	M.V.
13	TRUE	Empty	0.995	1	0.99	1	0.98	Citrulline	INCHIKEY:RHGKLRLOHDJJDR-BYPYZUCNSA-N	C 6H 13N 3O 3	175.1	9.33	0.0782935	10.1905	10.3665
14	TRUE	Empty	0.995	1	1	0.99	0.85	Glucose 6-phosphate	INCHIKEY:NBSCHQHZLSJFNQ-DVKNGEFBSA-N	C 6H 13O 9P	260	9.21	0.0111508	8.61301	8.13322
15	TRUE	Empty	0.995	0.99	0.99	1	0.72	Pentadecylic acid	INCHIKEY:WQEPLUUGTLDZJY-UHFFFAOYSA-N	C 15H 30O 2	242.2	9.94	0.0458822	8.14847	7.92299
16	TRUE	Empty	0.994	1	1	0.99	0.49	Oleic acid	INCHIKEY:ZQPPMHVWECSIRJ-KTKRTIGZSA-N	C 18H 34O 2	282.3	10.87	0.0201075	8.73804	8.34944
17	TRUE	Empty	0.991	1	1	0.99	0.98	Fructose	INCHIKEY:BJHIKXHVCXFQLS-UYFOZJQFSA-N	C 6H 12O 6	180.1	8.04	0.0197616	9.73497	8.87066
18	TRUE	Empty	0.99	0.99	0.99	0.99	0.17	NCGC00180206-02!5-hydroxy-7-[3,4,5-trihydroxy-6-(hydroxymethyl)oxan-2-yl]oxy-2-[4-(3,4,5-trihydroxy-6-methyloxan-2-yl)oxyphenyl]chromen-4-one	INCHIKEY:JWESWEUFMKPWPH-UHFFFAOYSA-N	C 27H 30O 14	578.2	7.66	0.0252863	7.09612	M.V.
19	TRUE	Empty	0.989	0.98	0.98	1	0.93	Glycerophosphocholine	INCHIKEY:SUHOQUVVVLNYQR-MRVPVSSYSA-N	C 8H 20NO 6P	257.1	8.94	0.000770205	9.8164	10.0103
20	TRUE	Empty	0.989	1	1	0.98	0.38	lysoPC 18:2	INCHIKEY:AXFAVZQXPFQIEI-IXPSVHCVNA-N	C 26H 50NO 7P	519.3	11.99	0.0329854	9.2463	8.94532
21	TRUE	Empty	0.988	1	0.99	0.98	0.92	Tryptophan	INCHIKEY:QIVBCDIJIAJPQS-UHFFFAOYSA-N	C 11H 12N 2O 2	204.1	5.21	0.0489305	9.02803	9.28902
22	TRUE	Empty	0.987	0.98	1	0.98	0.01	4-Methylumbelliferyl .beta.-D-glucopyranoside	INCHIKEY:YUDPTGPSBJVHCN-YMILTQATSA-N	C 16H 18O 8	338.1	6.27	0.00296052	7.90797	6.64443
23	TRUE	Empty	0.987	0.99	1	0.98	0.06	lysoPC 18:3	INCHIKEY:WKQNRCYKYCKESD-MNFNQZGVNA-N	C 26H 48NO 7P	517.3	11.57	0.0165458	8.19623	7.55089
24	TRUE	Empty	0.987	1	0.98	0.99	0.75	Uridine	INCHIKEY:DRTQHJPVMGBUCF-AYZDMWBASA-N	C 9H 12N 2O 6	244.1	6.28	0.173037	7.51436	6.86226
25	TRUE	Empty	0.986	0.98	0.97	1	0.73	Cytarabine	INCHIKEY:UHDGCWIWMRVCDJ-CCXZUQQUSA-N	C 9H 13N 3O 5	243.1	7.46	0.0448434	6.79989	M.V.
26	TRUE	Empty	0.986	1	0.96	1	0.97	D-Aspartic acid	INCHIKEY:CKLJMWTZIZZHCS-UWTATZPHSA-N	C 4H 7NO 4	133	8.72	0.0741258	9.40455	9.06727
27	TRUE	Empty	0.985	1	0.97	0.99	0.88	Adenine	INCHIKEY:GFFGJBXGBJISGV-UHFFFAOYSA-N	C 5H 5N 5	135.1	4.21	0.0865095	7.30078	8.65678
28	TRUE	Empty	0.984	1	0.99	0.97	0.85	Caffeic acid	INCHIKEY:QAIPRVGONGVQAS-DUXPYHPUSA-N	C 9H 8O 4	180	7.97	0.0203015	9.91361	9.41116
29	TRUE	Empty	0.981	0.98	1	0.97	0.6	PE(16:0/0:0)	INCHIKEY:YVYMBNSKXOXSKW-HXUWFJFHSA-N	C 21H 44NO 7P	453.3	12.19	0.0548704	7.68284	6.94904
30	TRUE	Empty	0.979	0.99	1	0.97	0.88	Phosphatidylethanolamine lyso 18:2	INCHIKEY:DTTGTTCKWRAIFM-HDXUUTQWSA-N	C 23H 44NO 7P	477.3	11.75	0.0204713	8.80086	8.4777
31	TRUE	Empty	0.973	0.99	1	0.95	0.51	Monolinolenin (9c,12c,15c)	INCHIKEY:GGJRAQULURVTAJ-PDBXOOCHSA-N	C 21H 36O 4	352.3	15.14	0.0723945	8.46679	8.17007
32	TRUE	Empty	0.973	0.99	0.98	0.96	0.05	NCGC00180782-02!5,7-dihydroxy-2-(4-hydroxyphenyl)-6-[3,4,5-trihydroxy-6-(hydroxymethyl)oxan-2-yl]chromen-4-one	INCHIKEY:MYXNWGACZJSMBT-UHFFFAOYSA-N	C 21H 20O 10	432.1	5.51	0.00247999	7.81206	6.98717
33	TRUE	Empty	0.969	0.98	0.94	0.99	0	1-Palmitoyl-2-hydroxy-sn-glycero-3-phospho-(1'-rac-glycerol)	INCHIKEY:BVJSKAUUFXBDOB-BPGUCPLFSA-N	C 22H 45O 9P	484.3	10.29	0.0123739	7.39207	6.96679
34	TRUE	Empty	0.966	1	0.9	1	0.59	Guanosine	INCHIKEY:NYHBQMYGNKIUIF-UUOKFMHZSA-N	C 10H 13N 5O 5	283.1	7.85	0.00549811	7.06952	-6.11782
35	TRUE	Empty	0.958	1	1	0.92	0.05	9-HPODE	INCHIKEY:JGUNZIWGNMQSBM-KPWHUNMNSA-N	C 18H 32O 4	312.2	8.02	0.0309657	8.04279	6.90238
36	TRUE	Empty	0.95	1	1	-	0.11	6-Hydroxyluteolin 6,4'-dimethyl ether 7-rutinoside	INCHIKEY:DEDMNYYOJUBPSV-LWNHNQRMSA-N	C 29H 34O 16	638.2	7.25	0.0278232	6.49136	5.6346
37	TRUE	Empty	0.95	1	1	-	0.96	Diglycolic acid	INCHIKEY:QEVGZEDELICMKH-UHFFFAOYSA-N	C 4H 6O 5	134	9.03	0.00902026	10.0159	9.53027
38	TRUE	Empty	0.949	1	1	-	0.97	L-Xylonate	INCHIKEY:QXKAIJAYHKCRRA-WCPAMKQWNA-N	C 5H 10O 6	166	8.18	0.0480219	8.80026	8.45492
39	TRUE	Empty	0.948	1	1	-	0.11	12,13-DiHODE	INCHIKEY:RGRKFKRAFZJQMS-OOHFSOINSA-N	C 18H 32O 4	312.2	10.33	0.000538837	7.53521	6.98738
40	TRUE	Empty	0.948	1	1	-	0.19	16E-octadecenoic acid	INCHIKEY:DPUHOWDIWWPPIP-NSCUHMNNSA-N	C 18H 34O 2	282.3	16.52	0.0418125	7.75697	7.45495
41	TRUE	Empty	0.948	0.99	1	-	0.13	4-Hydroxy-5-(3',4'-dihydroxyphenyl)-valeric acid-O-methyl-O-glucuronide	INCHIKEY:KRZPFELARLSRKT-UHFFFAOYSA-N	C 18H 26O 12	434.1	4.97	0.0129175	7.80832	8.0034
42	TRUE	Empty	0.948	1	1	-	0.88	Glucopyranosylmoranoline	INCHIKEY:GNVIYGFSOIHFHK-NIKVEEOSSA-N	C 12H 23NO 9	325.1	8.56	0.00914167	9.75521	8.72662
43	TRUE	Empty	0.948	1	1	-	0.31	Melongoside F	INCHIKEY:SOSXYUIKBSZONB-UHFFFAOYSA-N	C 39H 62O 13	738.4	9.14	0.0499064	8.06006	-7.3828
44	TRUE	Empty	0.948	1	1	-	0.34	PI(18:0/16:2(9Z,12Z))	INCHIKEY:YWDSWFNICPHDCI-NYQWBNQISA-N	C 43H 79O 13P	834.5	14.12	0.0158324	8.03919	8.10586
45	TRUE	Empty	0.948	1	1	-	0.56	Quercetin 3-methyl ether 7-rhamnoside-3'-xyloside	INCHIKEY:CIAVRKZNFRMUNY-KSRGDVLXSA-N	C 27H 30O 15	594.2	4.18	0.0497194	7.89221	7.56388
46	TRUE	Empty	0.947	1		-	0.03	Fistuloside B	INCHIKEY:HCWNBMHHBWNUPV-UHFFFAOYNA-N	C 45H 72O 18	900.5	8.37	0.0434986	-6.47647	7.47111
47	TRUE	Empty	0.947	0.99	1	-	0.98	Subaphylline	INCHIKEY:SFUVCMKSYKHYLD-ALCCZGGFSA-N	C 14H 20N 2O 3	264.1	10.81	0.0158024	8.64164	9.16642
48	TRUE	Empty	0.946	1	1	-	0.5	5,9-octadecadiynoic acid	INCHIKEY:HWCVHTFNKLJJOX-UHFFFAOYSA-N	C 18H 28O 2	276.2	8.64	0.000930938	7.78229	5.85645
49	TRUE	Empty	0.946	0.99	1	-	0.33	8E-Tetradecenyl acetate	INCHIKEY:VZGHIFSDFDWSOD-BQYQJAHWSA-N	C 16H 30O 2	254.2	9.97	0.0118915	7.76453	7.60275
50	TRUE	Empty	0.946	1	0.99	-	0.56	D-1-[(3-Carboxypropyl)amino]-1-deoxyfructose	INCHIKEY:HUEOABWGBTXQNF-LGFOQWRMNA-N	C 10H 19NO 7	265.1	9.15	0.000485102	8.26282	M.V.
51	TRUE	Empty	0.946	1	0.99	-	0.06	Gingerglycolipid A	INCHIKEY:MPSGDHOYFIUPSO-PDBXOOCHNA-N	C 33H 56O 14	676.4	11.43	0.0127601	7.66717	7.15099
52	TRUE	Empty	0.946	0.99	1	-	0	Rhodinyl isovalerate	INCHIKEY:OZAWINZSOFVOBJ-UHFFFAOYSA-N	C 15H 28O 2	240.2	9.49	0.0122458	7.00312	6.42408
53	TRUE	Empty	0.946	1		-	0.09	SORBATE	INCHIKEY:WSWCOQWTEOXDQX-MQQKCMAXSA-N	C 6H 8O 2	112.1	8.4	0.0014095	7.08822	M.V.
54	TRUE	Empty	0.945	0.99	1	-	0.28	3-Methyl-5-pentyl-2-furanundecanoic acid	INCHIKEY:QDTBMEGPXZUECM-UHFFFAOYSA-N	C 21H 36O 3	336.3	15.61	0.0125398	7.70509	7.49057
55	TRUE	Empty	0.945	0.99	1	-	0.34	9,12,13-TriHOME(10)	INCHIKEY:MDIUMSLCYIJBQC-BUHFOSPRSA-N	C 18H 34O 5	330.2	6.47	0.00331286	7.09124	5.47023
56	TRUE	Empty	0.945	1		-	0.8	Acetylisoniazid	INCHIKEY:CVBGNAKQQUWBQV-UHFFFAOYSA-N	C 8H 9N 3O 2	179.1	4.21	0.00212613	M.V.	8.69044
57	TRUE	Empty	0.945	0.99	1	-	0.01	Gallocatechin 4'-methyl ether	INCHIKEY:ITDYPNOEEHONAH-DZGCQCFKSA-N	C 16H 16O 7	320.1	4.2	0.0364245	8.45948	7.21399
58	TRUE	Empty	0.945	0.99	1	-	0.64	Palmitoyl glucuronide	INCHIKEY:QFUQXEVPTHAOHS-SXFAUFNYSA-N	C 22H 42O 7	418.3	14.42	0.0120413	7.1228	5.33729
59	TRUE	Empty	0.945	1	0.99	-	0	PG(18:2(9Z,12Z)/0:0)	INCHIKEY:VEEHTGYBVMTAAF-RFFZIGDUSA-N	C 24H 45O 9P	508.3	10.13	0.0208768	6.85991	6.14395
60	TRUE	Empty	0.944	0.99	0.99	-	0.61	Genistein 8-C-glucoside	INCHIKEY:HIWJJOYYZFELEZ-JLTAQAHISA-N	C 21H 20O 10	432.1	6.29	0.00277008	7.76522	M.V.
61	TRUE	Empty	0.944	1	0.99	-	0.01	Mayolene-18	INCHIKEY:RFJCITQJURPJMT-INOIBKDBSA-N	C 36H 64O 4	560.5	10.33	0.00257018	6.9872	5.13215
62	TRUE	Empty	0.944	1	0.99	-	0.1	Prupaside	INCHIKEY:GLRJVMYTCIKGGK-UHFFFAOYNA-N	C 27H 36O 12	552.2	7.77	0.0375449	7.41116	7.80785
63	TRUE	Empty	0.944	0.96	0.95	0.93	0.06	URIDINE-5-MONOPHOSPHATE	INCHIKEY:DJJCXFVJDGTHFX-UHFFFAOYSA-N	C 9H 13N 2O 9P	324	8.91	0.0376196	6.78932	7.19862
64	TRUE	Empty	0.943	0.98	1	-	0.3	(9R,13R)-10-oxo-11-phytoenoic acid	INCHIKEY:WKABMUFTMQMEAJ-HZPDHXFCSA-N	C 18H 30O 3	294.2	9.02	0.0204387	7.83688	7.48535
65	TRUE	Empty	0.942	0.98	1	-	0.02	5''-(4-Hydroxy-(E)-cinnamoyl) alpha-L-arabinofuranosyl-(1->3)-beta-D-xylopyranosyl-(1->4)-D-xylopyranoside	INCHIKEY:UCYLGUASAJXASI-ZZXKWVIFNA-N	C 24H 32O 15	560.2	6.25	0.000876918	7.51633	6.38309
66	TRUE	Empty	0.942	1	0.99	-	0.81	Calystegin A3	INCHIKEY:XOCBOVUINUHZJA-UHFFFAOYNA-N	C 7H 13NO 3	159.1	7.82	0.00710041	8.05506	7.64706
67	TRUE	Empty	0.942	0.99	1	-	0.43	Phlorisobutyrophenone 2-glucoside	INCHIKEY:PSBKCHXAPMSDFN-UHFFFAOYNA-N	C 16H 22O 9	358.1	6.37	0.0276678	M.V.	6.66599
68	TRUE	Empty	0.939	0.99	0.99	-	0.05	13-KODE	INCHIKEY:JHXAZBBVQSRKJR-WWYDAZRDSA-N	C 18H 30O 3	294.2	7.79	0.0410938	6.04758	M.V.
69	TRUE	Empty	0.938	0.98	0.99	-	0.13	Hoduloside VIII	INCHIKEY:RDSYZBZVCGNHLV-MDWZMJQENA-N	C 46H 76O 18	916.5	6.14	0.0434064	8.05923	7.56395
70	TRUE	Empty	0.938	0.98	0.99	-	0.2	Jascaric acid	INCHIKEY:DQGMPXYVZZCNDQ-KDQYYBQISA-N	C 18H 30O 2	278.2	8.78	0.0183633	7.96249	7.41394
71	TRUE	Empty	0.937	0.98	0.99	-	0.11	1-(sn-Glycero-3-phospho)-1D-myo-inositol	INCHIKEY:BMVUIWJCUQSHLZ-UJGXJMNGSA-N	C 9H 19O 11P	334.1	9.09	0.0112087	8.42789	8.894
72	TRUE	Empty	0.937	0.97	0.99	-	0.23	20:2(5Z,11Z)	INCHIKEY:RCYNQXHBZULXMM-GJWNNSPJSA-N	C 20H 36O 2	308.3	10.33	0.00445672	7.15395	6.24091
73	TRUE	Empty	0.937	0.99	0.99	-	0.08	Etherolenic acid	INCHIKEY:QWRJRLCIDLDGLM-GTTHPXIQSA-N	C 18H 28O 3	292.2	8.5	0.000310418	8.00125	6.36104
74	TRUE	Empty	0.937	0.97	0.99	-	0.38	MG(18:0/0:0/0:0)	INCHIKEY:VBICKXHEKHSIBG-FQEVSTJZSA-N	C 21H 42O 4	358.3	16.3	0.0201899	7.84319	7.94772
75	TRUE	Empty	0.936	0.98	0.99	-	0.56	1-Methoxy-1-(2,4,5-trimethoxyphenyl)-2-propanol	INCHIKEY:IXNRGYSRFBDZLB-UHFFFAOYNA-N	C 13H 20O 5	256.1	18.94	9.52557e-05	M.V.	8.87643
76	TRUE	Empty	0.936	1	0.98	-	0.97	3-Hydroxy-3-methylglutarate	INCHIKEY:NPOAOTPXWNWTSH-UHFFFAOYSA-N	C 6H 10O 5	162.1	8.58	0.0101018	8.68917	8.12114
77	TRUE	Empty	0.936	0.97	0.99	-	0.29	6,10,14-Trimethyl-5,9,13-pentadecatrien-2-one	INCHIKEY:LTUMRKDLVGQMJU-HSVQFRAPSA-N	C 18H 30O	262.2	15.77	0.0270463	7.98491	7.8288
78	TRUE	Empty	0.936	1	0.98	-	0.97	Dimethyl 2-oxoglutarate	INCHIKEY:TXIXSLPEABAEHP-UHFFFAOYSA-N	C 7H 10O 5	174.1	8.38	0.00290117	10.2176	8.72078
79	TRUE	Empty	0.936	0.99	0.94	0.92	0.04	Quercetin 3,4'-dimethyl ether	INCHIKEY:ZSPZNFOLWQEVQJ-UHFFFAOYSA-N	C 17H 14O 7	330.1	4.87	0.021941	M.V.	5.52105
80	TRUE	Empty	0.936	0.99		-	0.69	S-Formylglutathione	INCHIKEY:FHXAGOICBFGEBF-BQBZGAKWSA-N	C 11H 17N 3O 7S	335.1	8	0.0335198	8.48092	8.21695
81	TRUE	Empty	0.935	1	0.98	-	0.79	Norfuraneol	INCHIKEY:DLVYTANECMRFGX-UHFFFAOYSA-N	C 5H 6O 3	114	8.6	0.0263408	7.83114	5.95575
82	TRUE	Empty	0.934	0.98	0.99	-	0.84	5.alpha.-Pregnane-3.alpha.,21-diol-11,20-dione	INCHIKEY:XWYBFXIUISNTQG-VKMGZQQJSA-N	C 21H 32O 4	348.2	16.7	0.00173643	-5.98568	7.71775
83	TRUE	Empty	0.933	0.96	0.99	-	0.16	2-Octenoylcarnitine	INCHIKEY:YMIVWYONPRZBEJ-LXKVQUBZSA-N	C 15H 27NO 4	285.2	10.33	0.0255084	7.38582	6.46845
84	TRUE	Empty	0.931	0.98	0.98	-	0.52	(-)-12-hydroxy-9,10-dihydrojasmonic acid	INCHIKEY:SXFKEAKOXUOQGN-NXEZZACHSA-N	C 12H 20O 4	228.1	19.06	3.50238e-05	8.98115	M.V.
85	TRUE	Empty	0.931	1	0.97	-	0.59	(S)-malyl alpha-D-glucosaminide	INCHIKEY:DFSUVSNIIHLGAX-NKQVSKEESA-N	C 10H 17NO 9	295.1	8.74	0.0468563	9.26962	8.44978
86	TRUE	Empty	0.93	0.96	0.99	-	0.19	4-Feruloyl-1,5-quinolactone	INCHIKEY:OIGFDFULTVHQNZ-KJJWLSQTSA-N	C 17H 18O 8	350.1	6.52	0.000480454	7.3471	-5.3488
87	TRUE	Empty	0.93	0.99	0.97	-	0.79	Benzoylmalic acid	INCHIKEY:NVPJTXMOQCANSN-UHFFFAOYNA-N	C 11H 10O 6	238	8.21	0.00993821	8.12822	7.55717
88	TRUE	Empty	0.93	0.99	0.98	-	0.06	Hydroxytyrosol	INCHIKEY:JUUBCHWRXWPFFH-UHFFFAOYSA-N	C 8H 10O 3	154.1	7.97	0.0300034	M.V.	6.63061
89	TRUE	Empty	0.93	0.97	0.98	-	0.6	trans-p-Menthane-1,7,8-triol 8-glucoside	INCHIKEY:PHDIOUHOXBJRFB-UHFFFAOYNA-N	C 16H 30O 8	350.2	9.31	0.0123142	8.94565	9.31493
90	TRUE	Empty	0.929	0.99	0.97	-	0.09	9S-hydroxy-10S,11S-epoxy-12Z,15Z-octadecadienoic acid	INCHIKEY:OAIJQUCVLFETGX-OYWKBIDZSA-N	C 18H 30O 4	310.2	9.78	3.00521e-05	7.94216	5.86479
91	TRUE	Empty	0.928	0.98	0.98	-	0.43	9-hexacosenoic acid	INCHIKEY:WCVLVNLRVRJFLN-ISLYRVAYSA-N	C 26H 50O 2	394.4	18.67	0.0132249	7.48612	7.66566
92	TRUE	Empty	0.927	0.97	0.98	-	0.05	alpha-Furyl methyl diketone	INCHIKEY:JXZJRYDTSDCGLO-UHFFFAOYSA-N	C 7H 6O 3	138	6.61	0.0384135	5.74113	7.35851
93	TRUE	Empty	0.927	0.99	0.97	-	0.52	Bolusanthin	INCHIKEY:XCIMIGGTZKYBOR-UHFFFAOYSA-N	C 16H 14O 7	318.1	7.87	0.00406707	8.97253	6.75691
94	TRUE	Empty	0.926	1	0.96	-	0.57	Acetyl-D-carnitine	INCHIKEY:RDHQFKQIGNGIED-QMMMGPOBSA-N	C 9H 17NO 4	203.1	19	0.021568	9.33426	9.04316
95	TRUE	Empty	0.924	0.99	0.97	-	0.6	Oleoside dimethyl ester	INCHIKEY:KYVUMEGNMQDSHO-YWEYNIOJNA-N	C 18H 26O 11	418.1	7.38	0.0253732	8.24003	7.85953
96	TRUE	Empty	0.922	0.97	0.98	-	0.19	PA(20:3(8Z,11Z,14Z)/0:0)	INCHIKEY:LZSKMXWVALYCLG-CSLWLMPESA-N	C 23H 41O 7P	460.3	4.81	0.0298781	7.62421	M.V.
97	TRUE	Empty	0.918	1	0.95	-	0.01	Gingerglycolipid B	INCHIKEY:UHISGSDYAIIBMO-HZJYTTRNNA-N	C 33H 58O 14	678.4	11.73	0.00740181	7.39911	6.83617
98	TRUE	Empty	0.917	0.98	0.96	-	0.73	4-Coumaroylputrescine	INCHIKEY:CJHDBEPXEKGBDW-YVMONPNESA-N	C 13H 18N 2O 2	234.1	8.49	0.0349601	M.V.	8.22131
99	TRUE	Empty	0.916	0.82	0.89	-	0.88	5-Hydroxy-6,7,8,4'-tetramethoxyflavanone	INCHIKEY:SGWLCEXRWADMOA-UHFFFAOYSA-N	C 19H 20O 7	360.1	7.99	0.0332567	7.3993	6.20215
100	TRUE	Empty	0.916	0.99	0.96	-	0.19	Glycerylphosphorylethanolamine	INCHIKEY:FRMZOWIQVCBEAC-UHFFFAOYSA-N	C 5H 14NO 6P	215.1	9.25	0.0460838	7.48365	7.90803
101	TRUE	Empty	0.914	0.99	0.95	-	0.81	4-Aminobenzoic acid hydrazide	INCHIKEY:WPBZMCGPFHZRHJ-UHFFFAOYSA-N	C 7H 9N 3O	151.1	2	0.00122943	M.V.	8.43628
102	TRUE	Empty	0.914	0.83	0.89	0.96	0.19	D-Ribose 5-phosphate	INCHIKEY:FNZLKVNUWIIPSJ-UHNVWZDZSA-N	C 5H 11O 8P	230	9.25	0.00373247	7.50952	7.94778
103	TRUE	Empty	0.914	1	0.95	-	0.98	Phosphocholine	INCHIKEY:YHHSONZFOIEMCP-UHFFFAOYSA-N	C 5H 14NO 4P	183.1	10.26	0.0066408	9.60492	9.23813
104	TRUE	Empty	0.913	0.96		-	0	Cinncassiol D2 glucoside	INCHIKEY:UPEGWQJBOXUCSZ-UHFFFAOYNA-N	C 26H 42O 11	530.3	9.1	0.00103178	-5.15647	6.87027
105	TRUE	Empty	0.912	0.94	0.97	-	0.64	Phe-Asp-Lys	INCHIKEY:WIVCOAKLPICYGY-UHFFFAOYSA-N	C 19H 28N 4O 6	408.2	4.37	8.16229e-05	-5.89807	8.92371
106	TRUE	Empty	0.911	0.96	0.96	-	0.13	Myo-inositol-6-phosphate	INCHIKEY:INAPMGSXUVUWAF-WWHKVMGRSA-L	C 6H 11O 9P	258	8.3	0.0126784	7.24942	6.25705
107	TRUE	Empty	0.911	0.99	0.95	-	0.03	Pseudoprotogracillin	INCHIKEY:NRLDFEXARSJLFF-DHCZVXRMSA-N	C 52H 86O 22	1062.6	9.15	0.0257474	7.59485	7.81071
108	TRUE	Empty	0.908	0.98	0.95	-	0	10-hydroxy-16-oxo-hexadecanoic acid	INCHIKEY:VGISDMZERQFDDQ-UHFFFAOYSA-N	C 16H 30O 4	286.2	10.46	0.00607192	6.97169	6.68316
109	TRUE	Empty	0.906	0.96	0.96	-	0.02	NCGC00380956-01!(E)-9-hydroxy-6-[3,4,5-trihydroxy-6-(hydroxymethyl)oxan-2-yl]oxydec-4-enoic acid	INCHIKEY:LOXLRESYSNWIMK-DUXPYHPUSA-N	C 16H 28O 9	364.2	19.35	0.0166769	7.77341	7.93961
110	TRUE	Empty	0.905	0.9	0.94	0.88	0.97	Acipimox	INCHIKEY:DJQOOSBJCLSSEY-UHFFFAOYSA-N	C 6H 6N 2O 3	154	8.88	0.043846	8.35479	8.75056
111	TRUE	Empty	0.899	1	0.93	-	0.85	Formiminoglutamic acid	INCHIKEY:NRXIKWMTVXPVEF-BYPYZUCNSA-N	C 6H 10N 2O 4	174.1	7.94	0.039855	5.86249	7.93043
112	TRUE	Empty	0.899	0.94	0.95	-	0.7	Trp(Dioxidation)-Lys	INCHIKEY:POKFAXBAUBSXNN-UHFFFAOYSA-N	C 17H 24N 4O 5	364.2	4.51	5.39354e-05	-6.08524	8.96054
113	TRUE	Empty	0.896	1	0.92	-	0.01	16:1(10Z)(15Me)	INCHIKEY:RXCFIHNEQCDEAU-VURMDHGXSA-N	C 17H 32O 2	268.2	10.37	0.0155216	6.87446	6.41635
114	TRUE	Empty	0.893	0.84	1	-	0.61	3-[(2E)-2-(Nitromethylidene)hydrazinyl]benzoic acid	INCHIKEY:RASCTTJMDLLADA-WEVVVXLNSA-N	C 8H 7N 3O 4	209	5.2	0.0126646	7.56782	7.96994
115	TRUE	Empty	0.89	0.91	0.95	-	0.13	Phosphatidylcholine lyso 20:5	INCHIKEY:OYUDYTIZCLNYHF-NEUKSRIFSA-N	C 28H 48NO 7P	541.3	11.95	0.0408264	7.98125	7.69673
116	TRUE	Empty	0.887	0.99	0.91	-	0.74	2-(Ethoxymethyl)furan	INCHIKEY:BHGBNDNKYPEAAT-UHFFFAOYSA-N	C 7H 10O 2	126.1	6.89	0.0110773	7.90434	-5.92416
117	TRUE	Empty	0.887	0.94		-	0	D-Urobilin	INCHIKEY:DOKCNDVEPDZOJQ-MBTHVWNTSA-N	C 33H 40N 4O 6	588.3	9.06	0.0352114	6.55984	7.65741
118	TRUE	Empty	0.887	0.88	0.97	-	0.83	dimethyl (E)-2-methylbut-2-enedioate	INCHIKEY:WQEXBUQDXKPVHR-SNAWJCMRSA-N	C 7H 10O 4	158.1	5.8	0.00712484	-8.31243	9.28421
119	TRUE	Empty	0.886	0.97	0.92	-	0.13	heptaprenyl diphosphate	INCHIKEY:LSJLEXWXRKTZAJ-YUIIPXGZSA-N	C 35H 60O 7P 2	654.4	12.11	0.00447149	6.76789	6.12082
120	TRUE	Empty	0.883	0.83	0.99	-	0.17	Ile-Ile-Arg	INCHIKEY:KYLIZSDYWQQTFM-UHFFFAOYSA-N	C 18H 36N 6O 4	400.3	15.62	0.0277416	7.57301	7.16301
121	TRUE	Empty	0.882	0.85	0.97	-	0.96	Oxalosuccinic acid	INCHIKEY:UFSCUAXLTRFIDC-UHFFFAOYSA-N	C 6H 6O 7	190	12.42	0.0202954	8.20623	8.61277
122	TRUE	Empty	0.88	0.94	0.92	-	0.4	rhodexin A	INCHIKEY:HFMLTKBZNAPPNY-CEKKCSHUSA-N	C 29H 44O 9	536.3	12.5	0.0189426	6.98619	5.82992
123	TRUE	Empty	0.879	0.97	0.91	-	0.21	Nilutamide	INCHIKEY:XWXYUMMDTVBTOU-UHFFFAOYSA-N	C 12H 10F 3N 3O 4	317.1	8.75	0.000719283	6.9624	7.99025
124	TRUE	Empty	0.878	0.99	0.9	-	0.66	Octanoylglucuronide	INCHIKEY:ASFORWUCPCKFPY-BYNIDDHOSA-N	C 14H 24O 8	320.1	5.39	0.000102304	-6.26167	8.99353
125	TRUE	Empty	0.877	0.82	0.98	-	0.3	PI 42:7	INCHIKEY:OQVHMSJESJFKSW-VOZRZZGBNA-N	C 51H 85O 13P	936.6	18.03	0.0428219	7.45635	7.2539
126	TRUE	Empty	0.872	0.89	0.94	-	0.29	Apigenin 7-(2''-acetyl-6''-methylglucuronide)	INCHIKEY:UIAVWDXUPQFAJB-FZCUMBRGSA-N	C 24H 22O 12	502.1	6.56	0.0146341	7.14528	7.9924
127	TRUE	Empty	0.872	0.99	0.89	-	0.92	L-glucitol	INCHIKEY:FBPFZTCFMRRESA-FSIIMWSLSA-N	C 6H 14O 6	182.1	8.42	0.00536208	7.6997	6.0149
128	TRUE	Empty	0.871	0.83	0.97	-	0.3	Aloe emodin w-acetate	INCHIKEY:FUECAILUKAJTBR-UHFFFAOYSA-N	C 17H 12O 6	312.1	6.77	0.00417302	7.6769	7.95304
129	TRUE	Empty	0.87	0.87	0.95	-	0.06	LysoPC(20:4(5Z,8Z,11Z,14Z))	INCHIKEY:LAXQYRRMGGEGOH-HHHXNRCGSA-N	C 28H 50NO 7P	543.3	12.51	0.0154658	7.00294	5.48513
130	TRUE	Empty	0.867	0.89	0.93	-	0.08	Epicatechin 3-O-(4-methylgallate)	INCHIKEY:BXDRTHBTGNNTEW-VSVVGSIZNA-N	C 23H 20O 10	456.1	5.79	0.0126267	-6.69562	7.57983
131	TRUE	Empty	0.866	0.92		-	0.05	PIP(16:1(9Z)/18:1(11Z))	INCHIKEY:LLHJWGTYVVEIGY-LBWJGPEZSA-N	C 43H 80O 16P 2	914.5	9.23	0.00544411	-6.96677	7.95271
132	TRUE	Empty	0.865	0.96	0.89	-	0.01	2'',6''-Digalloyliriflophenone 3-C-glucoside	INCHIKEY:KSLXEOVMWLSIDW-UHFFFAOYNA-N	C 33H 28O 18	712.1	2.14	0.0166565	7.19812	-5.56455
133	TRUE	Empty	0.864	0.97	0.88	-	0.53	Ethyl 3-O-beta-D-glucopyranosyl-butanoate	INCHIKEY:HEBPYQNXDMDRKR-DSVRHLDHSA-N	C 12H 22O 8	294.1	19.03	0.0426613	8.4244	8.50164
134	TRUE	Empty	0.864	0.88	0.93	-	0.36	Galiposin	INCHIKEY:AFLGTFMAMFQGGU-GHXNOFRVSA-N	C 17H 12O 6	312.1	6.68	0.00976801	M.V.	7.1835
135	TRUE	Empty	0.862	0.86	0.94	-	0.86	5-Hydroxy-7,2',4'-trimethoxy-3',6'-diketoflavone	INCHIKEY:QAIQCPTUJVELPX-UHFFFAOYSA-N	C 18H 14O 8	358.1	2.2	0.0141256	8.17618	8.66475
136	TRUE	Empty	0.861	0.93	0.9	-	0.96	N-Acetylhistidine	INCHIKEY:KBOJOGQFRVVWBH-UHFFFAOYSA-N	C 8H 11N 3O 3	197.1	8.67	0.0402827	7.93242	8.48274
137	TRUE	Empty	0.86	0.99	0.87	-	0.62	Vanilloloside	INCHIKEY:SIMPNXWTAVEOTO-UHFFFAOYNA-N	C 14H 20O 8	316.1	5.97	0.00681363	7.4642	6.28209
138	TRUE	Empty	0.853	0.94	0.88	-	0.49	1,9-Nonanedithiol	INCHIKEY:GJRCLMJHPWCJEI-UHFFFAOYSA-N	C 9H 20S 2	192.1	14.35	1.22344e-05	M.V.	8.89118
139	TRUE	Empty	0.853	0.98	0.86	-	0.66	L-2-Amino-5-hydroxypentanoic acid	INCHIKEY:CZWARROQQFCFJB-UHFFFAOYNA-N	C 5H 11NO 3	133.1	8.77	0.00861825	6.96449	7.32927
140	TRUE	Empty	0.847	0.94	0.87	-	0.48	Dioxydemeton-S-methyl	INCHIKEY:PZIRJMYRYORVIT-UHFFFAOYSA-N	C 6H 15O 5PS 2	262	9.83	0.0401097	6.8457	7.32435
141	TRUE	Empty	0.846	0.92	0.89	-	0.28	PE(20:5(5Z,8Z,11Z,14Z,17Z)/0:0)	INCHIKEY:KCWGBXXAJHVZNN-KOYQJJOGSA-N	C 25H 42NO 7P	499.3	11.76	0.00648289	7.22377	-5.83622
142	TRUE	Empty	0.845	1	0.85	-	0.25	4-Methylumbelliferone	INCHIKEY:HSHNITRMYYLLCV-UHFFFAOYSA-N	C 10H 8O 3	176	8.49	0.0421296	M.V.	6.66077
143	TRUE	Empty	0.842	0.92	0.88	-	0.31	C.I. Acid Red 13	INCHIKEY:NLWPUNWFCUWCEU-QURGRASLSA-N	C 20H 14N 2O 7S 2	458	2.19	0.0170683	7.19481	7.55821
144	TRUE	Empty	0.841	0.89		-	0.01	(E,E)-Futoamide	INCHIKEY:MRUXVACSRPRMSN-KQQUZDAGSA-N	C 18H 23NO 3	301.2	10.32	0.00182077	6.45956	M.V.
145	TRUE	Empty	0.841	0.97	0.85	-	0.54	Serratamic acid	INCHIKEY:NDDJIMSGSZNACM-QWRGUYRKSA-N	C 13H 25NO 5	275.2	5.79	0.0379311	7.73325	8.77426
146	TRUE	Empty	0.838	1	0.83	-	0.61	3,5,7-Trihydroxyflavone 3-glucoside-8-sulfate	INCHIKEY:IFHBLQSSJDMWJS-DLBNBXSVSA-N	C 21H 20O 13S	512.1	6.36	0.000773333	8.11923	7.66657
147	TRUE	Empty	0.825	0.82	0.9	-	0.76	2-(4-Methyl-5-thiazolyl)ethyl octanoate	INCHIKEY:OGJATLSJIMPQBD-UHFFFAOYSA-N	C 14H 23NO 2S	269.1	6.22	0.0333148	7.58145	6.21955
148	TRUE	Empty	0.824	0.63	1	-	0.42	PC(19:3(10Z,13Z,16Z)/0:0)	INCHIKEY:YWILQZMMAROEQS-MQIAJVHNSA-N	C 27H 50NO 7P	531.3	12.48	0.0147272	8.13402	7.96943
149	TRUE	Empty	0.824	0.7	0.96	-	0.13	Piperenol A triacetate	INCHIKEY:UGMVPWAZGUPKPL-UHFFFAOYNA-N	C 27H 26O 10	510.2	6.55	0.00462863	M.V.	7.54649
150	TRUE	Empty	0.823	0.77	0.93	-	0.18	Epinastine	INCHIKEY:WHWZLSFABNNENI-UHFFFAOYSA-N	C 16H 15N 3	249.1	15.23	0.0449309	6.72193	7.7253
151	TRUE	Empty	0.821	1	0.81	-	0.78	(3S,6S)-3-Hydroxy-1,7-dioxaspiro[5.5]undecane	INCHIKEY:PSXHJXYOZUWYQY-IUCAKERBSA-N	C 9H 16O 3	172.1	10.25	0.0445098	8.69397	M.V.
152	TRUE	Empty	0.82	1	0.81	-	0.32	2-Methyl-1,4-benzoquinone	INCHIKEY:VTWDKFNVVLAELH-UHFFFAOYSA-N	C 7H 6O 2	122	4.2	0.0099999	8.27025	8.46121
153	TRUE	Empty	0.815	0.72	0.94	-	0.16	Euchrenone b3	INCHIKEY:AOFNFHUUIWLAAW-UHFFFAOYSA-N	C 27H 26O 7	462.2	6.04	0.0316103	7.8117	7.41839
154	TRUE	Empty	0.815	0.97	0.81	-	0	Triglochinin	INCHIKEY:LABCALMTQNDOAI-RPRRTJJHNA-N	C 14H 17NO 10	359.1	8.56	0.00533579	-5.91896	7.71882
155	TRUE	Empty	0.813	0.65	0.97	-	0.32	Gly-Cys-Lys	INCHIKEY:LGQZOQRDEUIZJY-UHFFFAOYSA-N	C 11H 22N 4O 4S	306.1	19.32	0.00473925	8.1327	8.23621
156	TRUE	Empty	0.811	0.88	0.85	-	0.63	(-)-1-Methylpropyl 1-propenyl disulfide	INCHIKEY:IOVUOUZQSDBAQN-GQCTYLIANA-N	C 7H 14S 2	162.1	2.53	0.0261999	8.13891	-6.87922
157	TRUE	Empty	0.811	0.59	1	-	0.01	PI(P-16:0/0:0)	INCHIKEY:MTLRNAKDFBBVEQ-BEURSELSSA-N	C 25H 49O 11P	556.3	10.29	0.0151862	6.44944	5.80763
158	TRUE	Empty	0.809	0.8	0.89	-	0.19	Calcitroic acid	INCHIKEY:MBLYZRMZFUWLOZ-WLWRUGSRSA-N	C 23H 34O 4	374.2	15.18	0.0113427	7.08978	-5.0853
159	TRUE	Empty	0.809	0.98	0.8	-	0.38	Epigallocatechin 3-O-(3,5-di-O-methylgallate)	INCHIKEY:QAXISZJBSORHRN-NFBKMPQASA-N	C 24H 22O 11	486.1	9.32	0.0292608	7.67486	8.13204
160	TRUE	Empty	0.807	0.81	0.88	-	0.25	Amritoside	INCHIKEY:FHIYBTOOLROABN-UHFFFAOYNA-N	C 26H 26O 18	626.1	10.01	0.00872085	6.97508	7.84105
161	TRUE	Empty	0.806	0.88	0.84	-	0.65	Allithiamine	INCHIKEY:WNCAVNGLACHSRZ-SDNWHVSQSA-N	C 15H 22N 4O 2S 2	354.1	8.38	0.0039619	8.68965	-5.60256
162	TRUE	Empty	0.806	0.78	0.89	-	0.63	Neosakuranetin	INCHIKEY:JGPQAWUEYNNXOH-QPJJXVBHSA-N	C 16H 14O 5	286.1	2.46	0.0124463	M.V.	8.14811
163	TRUE	Empty	0.806	0.86	0.85	-	0.02	Umbelliferyl arachidonate	INCHIKEY:SFTGFGOBCQCZDY-DOFZRALJSA-N	C 29H 36O 4	448.3	10.43	0.0112969	7.14325	5.49003
164	TRUE	Empty	0.803	0.7	0.93	-	0.66	2-Pivaloyl-1,3-indandione	INCHIKEY:RZKYEQDPDZUERB-UHFFFAOYSA-N	C 14H 14O 3	230.1	19.94	0.00955543	8.45884	8.56997
165	TRUE	Empty	0.794	0.8	0.87	-	0	Epicatechin 3-O-(3-O-methylgallate)	INCHIKEY:XGTBMCGGGJLOPS-MGRUGCKGNA-N	C 23H 20O 10	456.1	2.77	0.011159	M.V.	7.6579
166	TRUE	Empty	0.783	0.86	0.82	-	0.7	Tetrodotoxin	INCHIKEY:CFMYXEVWODSLAX-HUILCFQTSA-N	C 11H 17N 3O 8	319.1	8.91	0.0361903	7.18887	8.20325
167	TRUE	Empty	0.782	0.6	0.95	-	0.44	2-Hexylbenzothiazole	INCHIKEY:XETMGEVGSLTKRW-UHFFFAOYSA-N	C 13H 17NS	219.1	18.59	0.0537256	8.55699	M.V.
168	TRUE	Empty	0.782	0.58	0.96	-	0.1	6-Hydroxyluteolin 3'-methyl ether 7-sulfate	INCHIKEY:CWSOZWHESKRJLP-UHFFFAOYSA-N	C 16H 12O 10S	396	3.23	0.0454382	-5.73693	6.82751
169	TRUE	Empty	0.779	0.55	0.97	-	0.08	Apigenin 7-glucuronide-4'-(6''-malonylglucoside)	INCHIKEY:KWPZKEPPMDOLFK-DULDZXOESA-N	C 30H 30O 19	694.1	7.85	0.0308434	7.5933	-5.29307
170	TRUE	Empty	0.768	0.59	0.93	-	0.55	1,2,4,5,7-Pentathiocane	INCHIKEY:QFHGOPGLIADNQA-UHFFFAOYSA-N	C 3H 6S 5	201.9	2.14	0.000371522	-6.64332	8.19344
171	TRUE	Empty	0.765	0.86	0.79	-	0.02	7-Hydroxy-6,8-di-C-methylflavanone 7-O-arabinoside	INCHIKEY:RLPHVYYMPXVDER-WGPZSCIYSA-N	C 22H 24O 7	400.2	2.13	0.0492024	M.V.	6.41588
172	TRUE	Empty	0.765	1	0.72	-	0.85	n-heptanoyl acetic acid	INCHIKEY:SHDOPXQMNJDYDK-UHFFFAOYSA-N	C 9H 16O 3	172.1	14.86	0.0160183	-8.03934	8.90319
173	TRUE	Empty	0.763	0.99	0.73	-	0.83	2,6-Xylidine	INCHIKEY:UFFBMTHBGFGIHF-UHFFFAOYSA-N	C 8H 11N	121.1	2.38	0.00385673	10.6613	M.V.
174	TRUE	Empty	0.762	1	0.72	-	0	(9Z)-(7S,8S)-Dihydroxyoctadecenoic acid	INCHIKEY:WBZXABQRBWTVNN-JINBKUQRSA-N	C 18H 34O 4	314.2	10.58	0.049555	7.23409	5.11833
175	TRUE	Empty	0.755	0.99	0.91	0.57	0.29	glycerol 2-phosphate	INCHIKEY:DHCLVCXQIBBOPH-UHFFFAOYSA-N	C 3H 9O 6P	172	8.75	0.000992277	-6.24646	7.58819
176	TRUE	Empty	0.751	0.75	0.83	-	0.01	3-O-(Xylb1-3Glcb1-2(Xylb1-3)Glcb1-4Galb)-(25R)-12-oxo-5alpha-spirostan-3beta-ol	INCHIKEY:JPSRBSOLFHGRCF-GEQQGYQHSA-N	C 56H 92O 27	1196.6	8.38	0.046339	7.65622	-6.97059
177	TRUE	Empty	0.741	0.89	0.74	-	0.01	MLS001097641-01!	INCHIKEY:OVMSOCFBDVBLFW-SSXYINQQSA-N	C 31H 38O 11	586.2	9.4	0.00110509	6.93534	7.19267
178	TRUE	Empty	0.735	0.62	0.87	-	0.53	Rescinnamine	INCHIKEY:SZLZWPPUNLXJEA-JXMROGBWSA-N	C 35H 42N 2O 9	634.3	7.3	0.00371039	8.37544	M.V.
179	TRUE	Empty	0.732	0.6	0.82	0.72	0.73	Ala-Gly-Ala	INCHIKEY:ZVFVBBGVOILKPO-UHFFFAOYSA-N	C 8H 15N 3O 4	217.1	8.49	6.50099e-05	M.V.	8.28401
180	TRUE	Empty	0.726	0.68	0.83	-	0.6	2,2-Dihydroperoxypropane	INCHIKEY:XJHMOGCOFPLTNG-UHFFFAOYSA-N	C 3H 8O 4	108	2.46	0.0120743	9.30123	M.V.
181	TRUE	Empty	0.724	0.65	0.84	-	0.14	MLS000697730-01!	INCHIKEY:IYRMWMYZSQPJKC-UHFFFAOYSA-N	C 15H 10O 6	286	8.67	0.000458583	-5.68453	7.42476
182	TRUE	Empty	0.72	0.77	0.77	-	0.02	PA 32:10	INCHIKEY:HOSKUVKVBYMDPG-GTVIMTKWNA-N	C 35H 49O 8P	628.3	9.2	0.000678498	M.V.	7.66375
183	TRUE	Empty	0.703	0.54	0.86	-	0.91	3,4-Methylenedioxybenzoic acid	INCHIKEY:VDVJGIYXDVPQLP-UHFFFAOYSA-N	C 8H 6O 4	166	6.36	0.00825926	7.97222	M.V.
184	TRUE	Empty	0.701	0.75		-	0	Soyasaponin aa	INCHIKEY:AKVKZWDTBCHBPM-UHFFFAOYNA-N	C 53H 82O 21	1054.5	9.22	0.0142773	-6.67035	7.59628
185	TRUE	Empty	0.693	0.6	0.82	-	0.73	Alanyl-Glutamine	INCHIKEY:HJCMDXDYPOUFDY-UHFFFAOYSA-N	C 8H 15N 3O 4	217.1	8.49	6.50099e-05	M.V.	8.28401
186	TRUE	Empty	0.693	0.6	0.82	-	0.73	N-a-Acetylcitrulline	INCHIKEY:HJCMDXDYPOUFDY-UHFFFAOYSA-N	C 8H 15N 3O 4	217.1	8.49	6.50099e-05	M.V.	8.28401
187	TRUE	Empty	0.652	0.78	0.92	0.43	0.76	Sakuranetin	INCHIKEY:DJOJDHGQRNZXQQ-AWEZNQCLSA-N	C 16H 14O 5	286.1	7.98	0.0451373	8.96087	8.13244
