# Supplementary material
Source: publisher figshare collection journal article supplement (https://tandf.figshare.com/articles/dataset/_/9798299)
Supplement: Supplementary file 3 [file 1 › Table S8 - Copy.xlsx]

## Sheet: Table S8
Table S8. Differentially accumulated metabolites under silicon treatment with significant quantities (p, q ≤ 0.05) in control leaf (CL), silicon-treated leaf (SiL). Values are shown as the log10 of the precursor intensity. M.V. refers to the missing values of MS data.
#	Visible	Star	ID Score	Mass Accuracy Score	Isotopic Distribution Score	MS2 Score	XIC Score	Analyte Name	Accession Number	Molecular Formula	Molecular Weight	Retention Time (min)	t-test (Log10 Precursor Intensity) Comparison Level: Sample Biological Replicate Level: MS Sample	CL	SiL
1	TRUE	Empty	1	1	0.99	-	0.99	(R)-2-ethylmalic acid	INCHIKEY:YVYGHRNLPUMVBU-UHFFFAOYSA-N	C 6H 10O 5	162.1	8.25	0.0117072	10.2439	10.4959
2	TRUE	Empty	0.992	1	0.98	1	0.91	Phenylalanine	INCHIKEY:COLNVLDHVKWLRT-UHFFFAOYSA-N	C 9H 11NO 2	165.1	6.9	0.401743	9.54579	9.64001
3	TRUE	Empty	0.986	1	0.96	1	0.97	D-Aspartic acid	INCHIKEY:CKLJMWTZIZZHCS-UWTATZPHSA-N	C 4H 7NO 4	133	8.72	0.0631725	9.73167	9.88454
4	TRUE	Empty	0.985	0.99	0.96	1	0.39	ADENOSINE	INCHIKEY:OIRDTQYFTABQOQ-UHFFFAOYSA-N	C 10H 13N 5O 4	267.1	4.93	0.0277089	9.18512	9.35789
5	TRUE	Empty	0.983	1	1	0.97	0.83	Procyanidin B2	INCHIKEY:XFZJEEAOWLFHDH-NFJBMHMQSA-N	C 30H 26O 12	578.1	13.73	0.0145482	-7.65438	9.71721
6	TRUE	Empty	0.973	0.99	1	0.95	0.51	Monolinolenin (9c,12c,15c)	INCHIKEY:GGJRAQULURVTAJ-PDBXOOCHSA-N	C 21H 36O 4	352.3	15.14	0.212264	9.35665	9.40259
7	TRUE	Empty	0.97	0.99	0.97	0.96	0.65	Glu-Leu	INCHIKEY:YBAFDPFAUTYYRW-YUMQZZPRSA-N	C 11H 20N 2O 5	260.1	7.82	0.0214671	8.37699	8.8231
8	TRUE	Empty	0.952	1	0.99	0.91	0.83	Pheophorbide a	INCHIKEY:NSFSLUUZQIAOOX-QEWKCGBTSA-N	C 35H 36N 4O 5	592.3	12.13	0.01787	9.2553	9.48785
9	TRUE	Empty	0.949	1	1	-	0.89	3-Hydroxy-2H-pyran-2-one	INCHIKEY:LIPRKYKMVQPYPG-UHFFFAOYSA-N	C 5H 4O 3	112	9.68	0.00223777	8.8509	8.60507
10	TRUE	Empty	0.949	1	1	-	0.97	L-Xylonate	INCHIKEY:QXKAIJAYHKCRRA-WCPAMKQWNA-N	C 5H 10O 6	166	8.18	0.0270722	9.54946	9.81145
11	TRUE	Empty	0.948	1	1	-	0.25	4-O-alpha-D-Glucopyranuronosyl-D-galactose	INCHIKEY:KJBWXIYXECDDOT-UHFFFAOYNA-N	C 12H 20O 12	356.1	9.48	0.00745513	8.32707	8.67599
12	TRUE	Empty	0.948	1	1	-	0.8	Erythritol bis(carbonate)	INCHIKEY:ZWGIZHOZSXFSNW-UHFFFAOYSA-N	C 6H 6O 6	174	9.6	0.0288088	9.23168	8.98448
13	TRUE	Empty	0.948	1	1	-	0.56	Quercetin 3-methyl ether 7-rhamnoside-3'-xyloside	INCHIKEY:CIAVRKZNFRMUNY-KSRGDVLXSA-N	C 27H 30O 15	594.2	4.18	0.0179178	9.19146	9.30065
14	TRUE	Empty	0.947	0.99	1	-	0.11	methyl 10,12,13,16-bisepidioxy-9-hydroperoxy-14-octadecenoate	INCHIKEY:LWTWZXHNYOALAJ-UHFFFAOYSA-N	C 19H 32O 8	388.2	6.32	0.0112868	8.51192	8.71231
15	TRUE	Empty	0.947	0.99	1	-	0.31	Pterosupin	INCHIKEY:PXLWOFBAEVGBOA-UHFFFAOYSA-N	C 21H 24O 10	436.1	7.91	0.0173815	-5.25985	6.91436
16	TRUE	Empty	0.946	1	0.99	-	0.95	(Z)-Tamarindienal	INCHIKEY:RFTMILUWMDIPHH-NSCUHMNNSA-N	C 6H 6O 3	126	8.19	0.0287712	9.08169	9.19437
17	TRUE	Empty	0.946	1	0.99	-	0.06	Benzyl O-[arabinofuranosyl-(1->6)-glucoside]	INCHIKEY:VLAZYPZGDJXPDY-UHFFFAOYNA-N	C 18H 26O 10	402.2	6.4	0.0179798	8.79555	8.25313
18	TRUE	Empty	0.946	1	1	-	0.1	SQDG 34:3	INCHIKEY:LNRVRCHULFFBFY-IBGNPXJHSA-N	C 43H 76O 12S	816.5	13.97	0.0378571	8.26956	8.39122
19	TRUE	Empty	0.946	1	1	-	0.57	TR-Saponin A	INCHIKEY:VXQCKKNUNHNYPF-KBZHBASMNA-N	C 52H 78O 20	1022.5	11.79	0.0434909	8.11608	8.25962
20	TRUE	Empty	0.945	1	0.99	-	0.66	Ombuin	INCHIKEY:BWORNNDZQGOKBY-UHFFFAOYSA-N	C 17H 14O 7	330.1	9.11	0.00493351	8.50369	8.78928
21	TRUE	Empty	0.944	0.99	1	-	0.86	Avocadene 2-acetate	INCHIKEY:LUIGTZGBXWZJAX-UHFFFAOYNA-N	C 19H 36O 4	328.3	2.7	0.0142062	8.2884	7.96771
22	TRUE	Empty	0.944	0.99	0.99	-	0.67	Isoferulic acid 3-O-glucuronide	INCHIKEY:SHJZLGVIOYFHCB-CZAMIVPPNA-N	C 16H 18O 10	370.1	7.83	0.00758108	8.73606	9.13612
23	TRUE	Empty	0.944	1	0.99	-	0.1	Prupaside	INCHIKEY:GLRJVMYTCIKGGK-UHFFFAOYNA-N	C 27H 36O 12	552.2	7.77	0.00145356	7.33254	7.10246
24	TRUE	Empty	0.943	1	0.99	-	0.9	D-Gluconic acid Mn(II) salt	INCHIKEY:RGHNJXZEOKUKBD-UHFFFAOYNA-N	C 6H 12O 7	196.1	8.44	0.0217442	8.9208	9.04055
25	TRUE	Empty	0.943	0.99	0.99	-	0.46	Ethanolamine Oleate	INCHIKEY:KGWDUNBJIMUFAP-KVVVOXFISA-N	C 20H 41NO 3	343.3	14.78	0.0489889	8.41633	8.04933
26	TRUE	Empty	0.943	0.98	1	-	0.09	Phenethyl rutinoside	INCHIKEY:OKUGUNDXBGUFPA-UHFFFAOYNA-N	C 20H 30O 10	430.2	7.8	0.026126	7.72862	8.00816
27	TRUE	Empty	0.941	1	0.99	-	0.8	Glycolaldehyde dimer,mixture of stereoisomers	INCHIKEY:ATFVTAOSZBVGHC-UHFFFAOYSA-N	C 4H 8O 4	120	8.65	0.000552124	8.90785	9.15997
28	TRUE	Empty	0.94	0.99	0.99	-	0.63	Distichonic acid B	INCHIKEY:MQDGZZFOZKWSKP-UHFFFAOYNA-N	C 10H 18N 2O 8	294.1	8.49	0.0420882	8.19261	8.67886
29	TRUE	Empty	0.939	0.99	0.99	-	0.92	L-2-Amino-3-(1-pyrazolyl)propanoic acid	INCHIKEY:PIGOPELHGLPKLL-UHFFFAOYNA-N	C 6H 9N 3O 2	155.1	11.75	0.000384112	-7.10346	9.24932
30	TRUE	Empty	0.937	0.98	0.99	-	0.11	3,7-Dimethyl-5-octene-1,7-diol 1-glucoside	INCHIKEY:ZCDKJIRLFSPIQI-QPJJXVBHNA-N	C 16H 30O 7	334.2	11.65	4.8513e-05	8.22131	M.V.
31	TRUE	Empty	0.937	0.98	0.99	-	0.29	Quinic acid	INCHIKEY:AAWZDTNXLSGCEK-RKGSPJAZSA-N	C 7H 12O 6	192.1	6.99	0.00116835	7.90248	M.V.
32	TRUE	Empty	0.936	1	0.98	-	0.97	3-Hydroxy-3-methylglutarate	INCHIKEY:NPOAOTPXWNWTSH-UHFFFAOYSA-N	C 6H 10O 5	162.1	8.58	8.94358e-06	9.57561	M.V.
33	TRUE	Empty	0.936	0.97	0.99	-	0.29	6,10,14-Trimethyl-5,9,13-pentadecatrien-2-one	INCHIKEY:LTUMRKDLVGQMJU-HSVQFRAPSA-N	C 18H 30O	262.2	15.77	0.567637	8.41968	8.48876
34	TRUE	Empty	0.936	0.98	0.99	-	0.04	9S-hydroxy-10S,11S-epoxy-12Z,15Z-octadecadienoic acid	INCHIKEY:OAIJQUCVLFETGX-OYWKBIDZSA-N	C 18H 30O 4	310.2	7.48	0.00704449	8.68181	8.36395
35	TRUE	Empty	0.936	0.98	0.99	-	0.11	Harderoporphyrin	INCHIKEY:KECOXFKVIHSIBO-UJJXFSCMSA-N	C 35H 36N 4O 6	608.3	11.92	0.0012647	5.59356	7.41594
36	TRUE	Empty	0.936	1	0.98	-	0.53	Tricholomic acid	INCHIKEY:NTHMUJMQOXQYBR-UHFFFAOYSA-N	C 5H 8N 2O 4	160	8.97	0.0129089	8.39882	7.22281
37	TRUE	Empty	0.935	0.98	0.99	-	0.67	5S,15S-diHPETE	INCHIKEY:PCIOUQYHTPPZEM-BVHTXILBSA-N	C 20H 32O 6	368.2	11.53	0.032868	8.31761	8.13784
38	TRUE	Empty	0.935	1	0.98	-	0.79	Norfuraneol	INCHIKEY:DLVYTANECMRFGX-UHFFFAOYSA-N	C 5H 6O 3	114	8.6	0.00223054	9.10732	9.34738
39	TRUE	Empty	0.934	0.99	0.98	-	0.86	4-Methyloctyl acetate	INCHIKEY:DDCOSYUAKAARCK-UHFFFAOYSA-N	C 11H 22O 2	186.2	7.81	0.0229796	6.39626	-5.47767
40	TRUE	Empty	0.932	0.98	0.98	-	0	(2E)-hexenedioylcarnitine	INCHIKEY:XBOISISLTCYSPV-FNORWQNLSA-N	C 13H 21NO 6	287.1	6.18	0.036366	8.19602	7.48097
41	TRUE	Empty	0.932	0.97	0.99	-	0.14	MG(0:0/20:3(11Z,14Z,17Z)/0:0)	INCHIKEY:SLRKCKOWXHZSDR-PDBXOOCHSA-N	C 23H 40O 4	380.3	15.22	0.0476311	7.8217	8.03521
42	TRUE	Empty	0.931	0.98	0.98	-	0.01	Naringenin 5,7-dimethyl ether 4'-O-xylosyl-(1->4)-arabinoside	INCHIKEY:SVNWACIHAFUKAJ-UHFFFAOYSA-N	C 27H 32O 13	564.2	7.95	0.0163415	7.9228	7.54246
43	TRUE	Empty	0.93	0.97	0.98	-	0.77	(9Me,4E,8E,10E-d19:3)sphingosine	INCHIKEY:YWSMQDAGCQEIIC-SNNCSWOYSA-N	C 19H 35NO 2	309.3	19.55	0.0320073	7.73036	8.19377
44	TRUE	Empty	0.93	0.99	0.97	-	0.79	Benzoylmalic acid	INCHIKEY:NVPJTXMOQCANSN-UHFFFAOYNA-N	C 11H 10O 6	238	8.21	0.0431436	9.19511	9.29924
45	TRUE	Empty	0.93	1	0.97	-	0.49	Beta-D-ribopyranose	INCHIKEY:SRBFZHDQGSBBOR-TXICZTDVSA-N	C 5H 10O 5	150.1	6.75	0.0460754	8.78234	8.57716
46	TRUE	Empty	0.928	0.98	0.98	-	0.1	beta-Methylamino-L-alanine	INCHIKEY:UJVHVMNGOZXSOZ-UHFFFAOYSA-N	C 4H 10N 2O 2	118.1	16.85	0.00908482	9.02202	7.0204
47	TRUE	Empty	0.926	0.98	0.98	-	0.51	3-Hydroxy-4-methoxymandelate	INCHIKEY:PXMUSCHKJYFZFD-MRVPVSSYSA-N	C 9H 10O 5	198.1	10.19	0.00287004	6.29008	7.59612
48	TRUE	Empty	0.926	0.99	0.97	-	0.65	Histidinal	INCHIKEY:VYOIELONWKIZJS-UHFFFAOYSA-N	C 6H 9N 3O	139.1	7.49	0.00265512	8.29708	6.81641
49	TRUE	Empty	0.926	0.99	0.97	-	0.38	Villinol	INCHIKEY:GMVHFTVCPPCMGW-UHFFFAOYSA-N	C 24H 22O 8	438.1	7.16	0.0175626	-6.59439	7.61053
50	TRUE	Empty	0.924	0.99	0.96	-	0.24	4,6-Tricosanedione	INCHIKEY:OSWNBDSFXXEWTJ-UHFFFAOYSA-N	C 23H 44O 2	352.3	17.64	0.00861756	7.48527	7.80594
51	TRUE	Empty	0.923	0.98	0.97	-	0.35	3-Methyl sulfolene	INCHIKEY:FAYFWMOSHFCQPG-UHFFFAOYSA-N	C 5H 8O 2S	132	6.93	0.00968962	-5.96875	7.30722
52	TRUE	Empty	0.923	0.99	0.97	-	0.64	Glutaconylcarnitine	INCHIKEY:JXVUHLILXGZLFR-DNQSNQRASA-N	C 12H 19NO 6	273.1	8.58	0.0165613	8.97553	8.74214
53	TRUE	Empty	0.922	1	0.96	-	0.07	Melledonal A	INCHIKEY:BYWJNFQCWYEWHX-UHFFFAOYNA-N	C 23H 28O 8	432.2	7.99	0.0155903	7.87009	8.1324
54	TRUE	Empty	0.92	0.99	0.96	-	0.09	Isolimocitrol 3-glucoside	INCHIKEY:AMJOONKCBORCKA-RYUWUWGTSA-N	C 24H 26O 14	538.1	2.74	0.0452709	7.81036	M.V.
55	TRUE	Empty	0.92	0.87	0.93	0.94	0.35	Pyridoxine	INCHIKEY:LXNHXLLTXMVWPM-UHFFFAOYSA-N	C 8H 11NO 3	169.1	2.19	0.00894669	6.26541	7.15988
56	TRUE	Empty	0.915	0.97	0.96	-	0.03	6-[5]-ladderane-1-hexanol	INCHIKEY:MFSSFGRNGHJJLI-UHFFFAOYSA-N	C 18H 28O	260.2	15.19	0.0158141	7.5445	7.82599
57	TRUE	Empty	0.914	1	0.95	-	0.63	3,5,7-Trimethyl-2E,4E,6E,8E-decatetraene	INCHIKEY:RRPFGKUHEMWGSW-RYNMLCPOSA-N	C 13H 20	176.2	18.17	0.0470941	8.30853	M.V.
58	TRUE	Empty	0.914	0.94	0.98	-	0.1	Tetrahydrobiopterin	INCHIKEY:FNKQXYHWGSIFBK-UHFFFAOYSA-N	C 9H 15N 5O 3	241.1	2.36	0.0276126	7.47616	7.76505
59	TRUE	Empty	0.913	0.94	0.97	-	0.76	Methyl isopentyl disulfide	INCHIKEY:XTTOMWDBKHINLK-UHFFFAOYSA-N	C 6H 14S 2	150.1	19.63	0.0337176	9.01439	8.84271
60	TRUE	Empty	0.912	0.92	0.98	-	0.92	PI(O-18:0/0:0)	INCHIKEY:BDLQBUDICUCZRI-RDGQAVELSA-N	C 27H 55O 11P	586.3	16.47	0.0051527	9.55448	8.85535
61	TRUE	Empty	0.908	0.98	0.95	-	0.36	1-Methoxy-1-(2,4,5-trimethoxyphenyl)-2-propanol	INCHIKEY:IXNRGYSRFBDZLB-UHFFFAOYNA-N	C 13H 20O 5	256.1	18.96	0.0108496	-7.97675	8.83255
62	TRUE	Empty	0.908	1	0.94	-	0.49	cis-3-Hexenyl benzoate	INCHIKEY:BCOXBEHFBZOJJZ-ARJAWSKDSA-N	C 13H 16O 2	204.1	9.65	0.0362655	7.41228	7.46885
63	TRUE	Empty	0.906	0.97	0.95	-	0.08	Dinoravicholic acid	INCHIKEY:UWRHWTPWCRRHDI-ZKTFRNAESA-N	C 22H 36O 5	380.3	15.67	0.0362805	6.44821	7.29414
64	TRUE	Empty	0.905	0.99	0.94	-	0.95	Erythronic acid	INCHIKEY:JPIJQSOTBSSVTP-PWNYCUMCSA-N	C 4H 8O 5	136	6.62	0.0288102	8.77863	8.98212
65	TRUE	Empty	0.902	0.89	0.98	-	0.14	Edetic Acid	INCHIKEY:KCXVZYZYPLLWCC-UHFFFAOYSA-N	C 10H 16N 2O 8	292.1	3.11	0.00697981	6.97045	-5.38113
66	TRUE	Empty	0.9	0.98	0.93	-	0.3	Dihydrouracil	INCHIKEY:OIVLITBTBDPEFK-UHFFFAOYSA-N	C 4H 6N 2O 2	114	3.02	0.00185764	8.33569	5.72105
67	TRUE	Empty	0.899	0.99	0.93	-	0.56	2beta,7alpha,12alpha-Trihydroxy-3-oxo-5beta-cholan-24-oic Acid	INCHIKEY:ORAGCKFNLGDCMP-NKFQCJGASA-N	C 24H 38O 6	422.3	13.53	0.0430746	7.8063	8.11659
68	TRUE	Empty	0.894	0.84	1	-	0.01	Malvidin 3-sophoroside-5-glucoside	INCHIKEY:MUOOTWYWWLJAQU-FZAMDMKVSA-O	C 35H 45O 22	817.2	8.36	0.01843	8.1485	8.03899
69	TRUE	Empty	0.891	0.87	0.98	-	0.66	Phenylalanyl-Arginine	INCHIKEY:OZILORBBPKKGRI-UHFFFAOYSA-N	C 15H 23N 5O 3	321.2	2.05	0.00339477	M.V.	8.29654
70	TRUE	Empty	0.89	1	0.91	-	0.75	Ethyl beta-D-glucopyranoside	INCHIKEY:WYUFTYLVLQZQNH-UHFFFAOYNA-N	C 8H 16O 6	208.1	8.24	0.000120051	8.8644	8.14167
71	TRUE	Empty	0.882	0.85	0.97	-	0.96	Oxalosuccinic acid	INCHIKEY:UFSCUAXLTRFIDC-UHFFFAOYSA-N	C 6H 6O 7	190	12.42	0.00775461	8.3434	8.60916
72	TRUE	Empty	0.871	0.83	0.97	-	0.3	Aloe emodin w-acetate	INCHIKEY:FUECAILUKAJTBR-UHFFFAOYSA-N	C 17H 12O 6	312.1	6.77	0.000296624	6.37228	8.14827
73	TRUE	Empty	0.868	0.9	0.93	-	0.03	Symmetric dimethylarginine	INCHIKEY:HVPFXCBJHIIJGS-LURJTMIESA-N	C 8H 18N 4O 2	202.1	3.24	0.00213246	-5.32181	6.89363
74	TRUE	Empty	0.866	0.81	0.97	-	0.53	Asparaginyl-Arginine	INCHIKEY:NPDLYUOYAGBHFB-UHFFFAOYSA-N	C 10H 20N 6O 4	288.2	14.78	4.22e-05	M.V.	9.33915
75	TRUE	Empty	0.865	0.76	0.99	-	0.43	3-Hydroxy-1-phenyl-1-hexadecanone	INCHIKEY:BHJLLBCJOQXMIH-UHFFFAOYNA-N	C 22H 36O 2	332.3	16.18	0.0208207	8.18966	7.78505
76	TRUE	Empty	0.864	0.99	0.87	-	0.41	Cellulose, microcrystalline	INCHIKEY:PTHCMJGKKRQCBF-UHFFFAOYNA-N	C 14H 26O 11	370.1	9.03	0.00489184	7.49832	5.99143
77	TRUE	Empty	0.864	0.88	0.93	-	0.36	Galiposin	INCHIKEY:AFLGTFMAMFQGGU-GHXNOFRVSA-N	C 17H 12O 6	312.1	6.68	0.0109473	8.16138	M.V.
78	TRUE	Empty	0.861	0.97	0.88	-	0.09	L-gamma-glutamyl-L-leucine	INCHIKEY:MYFMARDICOWMQP-UHFFFAOYSA-N	C 11H 20N 2O 5	260.1	6.87	1.41558e-05	7.59201	M.V.
79	TRUE	Empty	0.86	0.93	0.9	-	0	2-O-Acetylarbutin	INCHIKEY:QLDACILJKOVPDG-UHFFFAOYNA-N	C 14H 18O 8	314.1	2.03	0.00659584	6.13608	7.56609
80	TRUE	Empty	0.852	0.81	0.95	-	0.73	(6RS)-22-oxo-23,24,25,26,27-pentanorvitamin D3 6,19-sulfur dioxide adduct / (6RS)-22-oxo-23,24,25,26,27-pentanorcholecalciferol 6,19-sulfur dioxide adduct	INCHIKEY:QPAPCSSCGKZVEI-RMZXUFQGSA-N	C 22H 32O 4S	392.2	2.71	0.0478026	6.7066	6.40217
81	TRUE	Empty	0.852	1	0.85	-	0.8	5-Phenyl-1H-tetrazole	INCHIKEY:MARUHZGHZWCEQU-UHFFFAOYSA-N	C 7H 6N 4	146.1	2.75	0.00681712	9.94245	9.76655
82	TRUE	Empty	0.847	0.98	0.86	-	0.2	trans-p-Menthane-7,8-diol 8-glucoside	INCHIKEY:KMNHZNJPIOZBEM-UHFFFAOYNA-N	C 16H 30O 7	334.2	8.12	0.00336829	8.22035	M.V.
83	TRUE	Empty	0.846	0.86	0.91	-	0.37	Arginyl-Phenylalanine	INCHIKEY:PQBHGSGQZSOLIR-UHFFFAOYSA-N	C 15H 23N 5O 3	321.2	5.56	0.0246498	8.65742	8.97485
84	TRUE	Empty	0.845	0.78	0.95	-	0	Erysothiopine	INCHIKEY:HNDYDGVKLJMGCM-UHFFFAOYSA-N	C 19H 21NO 7S	407.1	6.43	0.0304004	7.62355	5.9856
85	TRUE	Empty	0.843	0.98	0.85	-	0.67	Pymetrozin	INCHIKEY:QHMTXANCGGJZRX-WUXMJOGZSA-N	C 10H 11N 5O	217.1	6.47	0.0120406	8.91981	M.V.
86	TRUE	Empty	0.841	0.8	0.94	-	0.06	PG 26:7	INCHIKEY:NSPLNLOPJQCNFR-QNKKZEFYSA-N	C 32H 49O 10P	624.3	12.18	0.0353192	7.20734	7.80759
87	TRUE	Empty	0.839	0.85	0.91	-	0	Oolongtheanin	INCHIKEY:BEHKEBMWHIDHDT-UHFFFAOYSA-N	C 36H 28O 17	732.1	2.57	0.00854513	7.05684	9.60188
88	TRUE	Empty	0.834	0.86	0.9	-	0.04	PyroGlu-Ser-Arg	INCHIKEY:WRHLUOQLHYDXFI-UHFFFAOYSA-N	C 14H 24N 6O 6	372.2	8.59	0.0353059	6.1468	-5.19135
89	TRUE	Empty	0.828	0.72	0.95	-	0.53	Eriodictyol 7,3'-dimethyl ether 4'-prenyl ether	INCHIKEY:QWIIYBSNKMRSLQ-UHFFFAOYSA-N	C 22H 24O 6	384.2	7.85	0.0424801	8.01547	7.47587
90	TRUE	Empty	0.826	0.98	0.68	0.87	0.79	NCGC00385208-01!(2R,3R)-2-(2,6-dihydroxyphenyl)-3,5,7-trihydroxy-2,3-dihydrochromen-4-one	INCHIKEY:NBQYBZYBTNQEQG-LSDHHAIUSA-N	C 15H 12O 7	304.1	7.48	0.0337333	8.26619	7.20932
91	TRUE	Empty	0.824	0.92	0.85	-	0	PI(O-20:0/0:0)	INCHIKEY:FHYCYULARSUKFT-IRACFBFSSA-N	C 29H 59O 11P	614.4	16.48	0.00868576	7.36052	6.69761
92	TRUE	Empty	0.817	0.72	0.94	-	0.2	Glepidotin C	INCHIKEY:NOPHUFYTJFIALJ-UHFFFAOYSA-N	C 19H 22O 3	298.2	9.45	0.0382823	7.35244	6.29245
93	TRUE	Empty	0.811	0.59	1	-	0.01	PI(P-16:0/0:0)	INCHIKEY:MTLRNAKDFBBVEQ-BEURSELSSA-N	C 25H 49O 11P	556.3	10.29	0.0720673	8.53802	8.6139
94	TRUE	Empty	0.809	0.92	0.83	-	0.27	5-Deoxyribose-1-phosphate	INCHIKEY:XXQFKXPJJNBLSU-VVLSSCEONA-N	C 5H 11O 7P	214	8.04	0.0269685	8.36439	7.81186
95	TRUE	Empty	0.809	0.8	0.89	-	0.19	Calcitroic acid	INCHIKEY:MBLYZRMZFUWLOZ-WLWRUGSRSA-N	C 23H 34O 4	374.2	15.18	0.00174842	8.08634	8.3415
96	TRUE	Empty	0.807	0.85	0.86	-	0	17-(Allylamino)-17-demethoxygeldanamycin	INCHIKEY:AYUNIORJHRXIBJ-ZIKJQUQBSA-N	C 31H 43N 3O 8	585.3	12.88	0.0319716	5.91171	7.02982
97	TRUE	Empty	0.806	0.88	0.84	-	0.65	Allithiamine	INCHIKEY:WNCAVNGLACHSRZ-SDNWHVSQSA-N	C 15H 22N 4O 2S 2	354.1	8.38	0.0279209	9.49821	9.87159
98	TRUE	Empty	0.804	0.64	0.98	0.74	0.76	Donepezil	INCHIKEY:ADEBPBSSDYVVLD-UHFFFAOYNA-N	C 24H 29NO 3	379.2	10.56	0.0452435	-8.57723	9.27014
99	TRUE	Empty	0.802	0.65	0.95	-	0.9	Diphenyl disulfide	INCHIKEY:GUUVPOWQJOLRAS-UHFFFAOYSA-N	C 12H 10S 2	218	8.38	0.0293961	5.94545	9.23252
100	TRUE	Empty	0.802	0.77	0.9	-	0.23	Talinolol	INCHIKEY:MXFWWQICDIZSOA-UHFFFAOYSA-N	C 20H 33N 3O 3	363.3	16.53	0.0380755	-8.34325	9.26185
101	TRUE	Empty	0.793	0.86	0.83	-	0.79	Yuccaol C	INCHIKEY:UMQRRGZFEXVPFD-NSCUHMNNSA-N	C 30H 22O 10	542.1	9.94	0.016841	8.37441	8.9422
102	TRUE	Empty	0.789	0.86	0.83	-	0.25	N-Nitrosopiperidine	INCHIKEY:UWSDONTXWQOZFN-UHFFFAOYSA-N	C 5H 10N 2O	114.1	9.31	0.0198645	6.64456	5.4591
103	TRUE	Empty	0.783	0.67	0.92	-	0	Microcystin-YR	INCHIKEY:OWHASZQTEFAUJC-KHZAZHPGSA-N	C 52H 72N 10O 13	1044.5	10.68	0.0373659	-5.19055	6.70796
104	TRUE	Empty	0.763	0.64	0.9	-	0.9	S-3-oxodecanoyl cysteamine	INCHIKEY:LGPPHMDEKCAPLE-UHFFFAOYSA-N	C 12H 23NO 2S	245.1	10.28	0.00871664	7.62001	8.29111
105	TRUE	Empty	0.761	0.52	0.95	-	0.27	Paromomycin	INCHIKEY:UOZODPSAJZTQNH-LSWIJEOBSA-N	C 23H 45N 5O 14	615.3	8.58	0.042966	7.29527	6.62725
106	TRUE	Empty	0.736	0.9	0.73	-	0.48	Ethyl propyl disulfide	INCHIKEY:SNGRPWPVGSSZGV-UHFFFAOYSA-N	C 5H 12S 2	136	6.7	0.00426562	7.9675	-6.64881
107	TRUE	Empty	0.717	0.99	0.65	-	0.42	Verimol J	INCHIKEY:JHAZVELQNMEUTR-UHFFFAOYNA-N	C 10H 14O 3	182.1	18.99	0.0184539	-8.22192	9.00924
108	TRUE	Empty	0.709	0.98	0.65	-	0.07	Aspalatone	INCHIKEY:JVBIZYPCGNCWIT-UHFFFAOYSA-N	C 15H 12O 6	288.1	7.84	0.0447848	7.27166	M.V.
109	TRUE	Empty	0.706	0.97	0.65	-	0.96	3-Methyl-3H-imidazo[4,5-f]quinoxalin-2-amine	INCHIKEY:HKZZYGFWIFKKIR-UHFFFAOYSA-N	C 10H 9N 5	199.1	4.99	0.00556667	8.49574	-7.42499
110	TRUE	Empty	0.704	0.56	0.95	0.59	0.65	Cepharanthine	INCHIKEY:YVPXVXANRNDGTA-FQLXRVMXSA-N	C 37H 38N 2O 6	606.3	19.64	0.0129394	-8.24802	9.07294
111	TRUE	Empty	0.703	0.51	0.87	-	0.47	Demexiptiline	INCHIKEY:SEDQWOMFMIJKCU-UHFFFAOYSA-N	C 18H 18N 2O	278.1	18.98	0.000741799	7.87619	-5.11504
