# Supplementary material
Source: publisher figshare collection journal article supplement (https://tandf.figshare.com/articles/dataset/_/9798299)
Supplement: Supplementary file 3 [file 1 › Table S9 - Copy.xlsx]

## Sheet: Table S9
Table S9. Differentially accumulated metabolites under silicon treatment with significant quantities (p, q ≤ 0.05) in control leaf (CL), silicon-treated leaf (SiL). Values are shown as the log10 of the precursor intensity. M.V. refers to the missing values of MS data.
#	Visible	Star	ID Score	Mass Accuracy Score	Isotopic Distribution Score	MS2 Score	XIC Score	Analyte Name	Accession Number	Molecular Formula	Molecular Weight	Retention Time (min)	t-test (Log10 Precursor Intensity) Comparison Level: Sample Biological Replicate Level: MS Sample	CR	SiR
1	TRUE	Empty	1	0.99	1	0.94	0.69	2-Linoleoylglycerol	INCHIKEY:IEPGNWMPIFDNSD-HZJYTTRNSA-N	C 21H 38O 4	354.3	15.65	0.0676246	8.62362	9.32664
2	TRUE	Empty	1	0.98	1	0.84	0.94	Erucamide	INCHIKEY:UAUDZVJPLUQNMU-KTKRTIGZSA-N	C 22H 43NO	337.3	19.68	0.0350832	8.94491	8.69015
3	TRUE	Empty	1	0.98	1	0.89	0.94	NCGC00180823-02!(3R,4R,5R)-5-[(E)-3-(3,4-dihydroxyphenyl)prop-2-enoyl]oxy-3,4-dihydroxycyclohexene-1-carboxylic acid	INCHIKEY:QMPHZIPNNJOWQI-GDDAOPKQSA-N	C 16H 16O 8	336.1	3.26	0.0435667	9.30067	9.65309
4	TRUE	Empty	1	0.99	0.97	-	0.81	Porric acid B	INCHIKEY:YRDAFVVZXCAVIU-UHFFFAOYSA-N	C 15H 12O 6	288.1	7.35	0.00640961	7.40829	M.V.
5	TRUE	Empty	1	1	0.99	-	0.84	Squamolone	INCHIKEY:XYVMBSCIEDOIJQ-UHFFFAOYSA-N	C 5H 8N 2O 2	128.1	8.92	0.0370977	8.56081	8.80934
6	TRUE	Empty	0.995	1	1	0.99	0.85	Glucose 6-phosphate	INCHIKEY:NBSCHQHZLSJFNQ-DVKNGEFBSA-N	C 6H 13O 9P	260	9.21	0.00209018	8.57042	8.93011
7	TRUE	Empty	0.995	0.99	0.99	1	0.72	Pentadecylic acid	INCHIKEY:WQEPLUUGTLDZJY-UHFFFAOYSA-N	C 15H 30O 2	242.2	9.94	0.0498647	8.19928	8.06432
8	TRUE	Empty	0.994	1	1	0.99	0.7	5-Acetyl-2-hydroxybenzoic acid	INCHIKEY:NZRDKNBIPVLNHA-UHFFFAOYSA-N	C 9H 8O 4	180	3.23	0.0247262	8.16757	8.43123
9	TRUE	Empty	0.994	0.98	1	1	0.93	Epicatechin	INCHIKEY:PFTAWBLQPZVEMU-UKRRQHHQSA-N	C 15H 14O 6	290.1	7.69	0.0212992	8.65137	7.67841
10	TRUE	Empty	0.992	1	0.98	1	0.91	Phenylalanine	INCHIKEY:COLNVLDHVKWLRT-UHFFFAOYSA-N	C 9H 11NO 2	165.1	6.9	0.097932	7.76128	8.47454
11	TRUE	Empty	0.99	1	1	0.98	0.91	D-Tryptophan	INCHIKEY:QIVBCDIJIAJPQS-SECBINFHSA-N	C 11H 12N 2O 2	204.1	7.67	0.0134922	9.26246	8.78767
12	TRUE	Empty	0.99	0.99	0.99	0.99	0.17	NCGC00180206-02!5-hydroxy-7-[3,4,5-trihydroxy-6-(hydroxymethyl)oxan-2-yl]oxy-2-[4-(3,4,5-trihydroxy-6-methyloxan-2-yl)oxyphenyl]chromen-4-one	INCHIKEY:JWESWEUFMKPWPH-UHFFFAOYSA-N	C 27H 30O 14	578.2	7.66	0.0240436	7.11773	M.V.
13	TRUE	Empty	0.987	0.99	0.97	1	0.35	PC(16:0/18:2(9Z,12Z))	INCHIKEY:JLPULHDHAOZNQI-ZTIMHPMXSA-N	C 42H 80NO 8P	757.6	5.61	0.0294104	8.26595	-7.30269
14	TRUE	Empty	0.987	1	0.98	0.99	0.75	Uridine	INCHIKEY:DRTQHJPVMGBUCF-AYZDMWBASA-N	C 9H 12N 2O 6	244.1	6.28	0.129278	7.52717	6.74724
15	TRUE	Empty	0.986	0.98	0.97	1	0.73	Cytarabine	INCHIKEY:UHDGCWIWMRVCDJ-CCXZUQQUSA-N	C 9H 13N 3O 5	243.1	7.46	0.0434281	6.83075	M.V.
16	TRUE	Empty	0.985	1	0.97	0.99	0.88	Adenine	INCHIKEY:GFFGJBXGBJISGV-UHFFFAOYSA-N	C 5H 5N 5	135.1	4.21	0.0515772	7.34495	8.86043
17	TRUE	Empty	0.983	0.99	0.98	0.98	0.41	lysoPC 18:2	INCHIKEY:SPJFYYJXNPEZDW-UYZMMGOYNA-N	C 26H 50NO 7P	519.3	3.35	0.0170934	8.51328	7.88596
18	TRUE	Empty	0.982	1	1	0.97	0.76	nicotiflorin	INCHIKEY:RTATXGUCZHCSNG-QHWHWDPRSA-N	C 27H 30O 15	594.2	8.18	0.0066914	7.24345	-4.94966
19	TRUE	Empty	0.981	0.98	0.99	0.98	0.32	N-Oleoylethanolamine	INCHIKEY:BOWVQLFMWHZBEF-KTKRTIGZSA-N	C 20H 39NO 2	325.3	15.71	0.00232051	6.7475	-5.10067
20	TRUE	Empty	0.971	1	0.93	0.99	0.78	Neotrehalose	INCHIKEY:HDTRYLNUVZCQOY-BTLHAWITSA-N	C 12H 22O 11	342.1	10.57	0.0330238	8.06076	8.68606
21	TRUE	Empty	0.966	1	0.9	1	0.59	Guanosine	INCHIKEY:NYHBQMYGNKIUIF-UUOKFMHZSA-N	C 10H 13N 5O 5	283.1	7.85	0.0173071	7.09196	6.00772
22	TRUE	Empty	0.955	1	0.98	0.92	0.53	Salicylic acid	INCHIKEY:YGSDEFSMJLZEOE-UHFFFAOYSA-N	C 7H 6O 3	138	2.1	0.0271576	8.15233	8.35928
23	TRUE	Empty	0.952	1	0.99	0.91	0.83	Pheophorbide a	INCHIKEY:NSFSLUUZQIAOOX-QEWKCGBTSA-N	C 35H 36N 4O 5	592.3	12.13	0.0113966	6.94833	-5.64456
24	TRUE	Empty	0.95	1	1	-	0.11	6-Hydroxyluteolin 6,4'-dimethyl ether 7-rutinoside	INCHIKEY:DEDMNYYOJUBPSV-LWNHNQRMSA-N	C 29H 34O 16	638.2	7.25	0.00716265	6.46163	M.V.
25	TRUE	Empty	0.949	1		-	0.05	(+/-)-N,N-Dimethyl menthyl succinamide	INCHIKEY:ZPVCSXMAYSEYLT-UHFFFAOYNA-N	C 12H 24	168.2	11.77	0.0170784	7.07903	M.V.
26	TRUE	Empty	0.948	1	1	-	0.54	2,3-Methyleneglutaric acid	INCHIKEY:YNNMOGWGBFSMGB-UHFFFAOYSA-N	C 7H 8O 4	156	2.1	0.0402971	8.17211	8.35908
27	TRUE	Empty	0.948	1	1	-	0.25	4-O-alpha-D-Glucopyranuronosyl-D-galactose	INCHIKEY:KJBWXIYXECDDOT-UHFFFAOYNA-N	C 12H 20O 12	356.1	9.48	0.0227887	8.01384	8.37498
28	TRUE	Empty	0.948	1	1	-	0.97	D-(-)-Fructose	INCHIKEY:RFSUNEUAIZKAJO-VRPWFDPXSA-N	C 6H 12O 6	180.1	9.83	0.00820089	9.38393	9.60917
29	TRUE	Empty	0.947	0.99	1	-	0.01	4-Hydroxy-(3',4'-dihydroxyphenyl)-valeric acid	INCHIKEY:JDBYFCLHVYVXCX-UHFFFAOYNA-N	C 11H 14O 5	226.1	4.81	0.0144859	7.1904	6.17989
30	TRUE	Empty	0.946	1	0.99	-	0.29	2-Dodecylbenzenesulfonic acid	INCHIKEY:WBIQQQGBSDOWNP-UHFFFAOYSA-N	C 18H 30O 3S	326.2	10.15	0.0101948	8.56905	8.4805
31	TRUE	Empty	0.946	1	1	-	0.3	3-Anisaldehyde	INCHIKEY:WMPDAIZRQDCGFH-UHFFFAOYSA-N	C 8H 8O 2	136.1	2.11	0.0241299	7.62504	7.84375
32	TRUE	Empty	0.946	1	1	-	0.5	5,9-octadecadiynoic acid	INCHIKEY:HWCVHTFNKLJJOX-UHFFFAOYSA-N	C 18H 28O 2	276.2	8.64	0.00271724	7.85097	6.58672
33	TRUE	Empty	0.946	0.99	1	-	0.33	8E-Tetradecenyl acetate	INCHIKEY:VZGHIFSDFDWSOD-BQYQJAHWSA-N	C 16H 30O 2	254.2	9.97	0.0432086	7.83409	7.66578
34	TRUE	Empty	0.946	1	1	-	0.44	Chlorogenoquinone	INCHIKEY:ITENTBHADJNDDH-RQOWECAXNA-N	C 16H 16O 9	352.1	2.15	0.0302343	8.08037	8.25146
35	TRUE	Empty	0.946	1	1	-	0.13	LPA(0:0/18:2(9Z,12Z))	INCHIKEY:PALVOIADDFXQGT-KKFOGOCZSA-N	C 21H 39O 7P	434.2	9.36	0.0492085	7.97825	7.67398
36	TRUE	Empty	0.946	1		-	0.09	SORBATE	INCHIKEY:WSWCOQWTEOXDQX-MQQKCMAXSA-N	C 6H 8O 2	112.1	8.4	0.000145797	7.11008	8.13867
37	TRUE	Empty	0.946	1	1	-	0.1	SQDG 34:3	INCHIKEY:LNRVRCHULFFBFY-IBGNPXJHSA-N	C 43H 76O 12S	816.5	13.97	0.0118859	6.87026	5.91697
38	TRUE	Empty	0.945	0.99	1	-	0.64	Palmitoyl glucuronide	INCHIKEY:QFUQXEVPTHAOHS-SXFAUFNYSA-N	C 22H 42O 7	418.3	14.42	0.0413624	7.15497	M.V.
39	TRUE	Empty	0.944	0.99	0.99	-	0.61	Genistein 8-C-glucoside	INCHIKEY:HIWJJOYYZFELEZ-JLTAQAHISA-N	C 21H 20O 10	432.1	6.29	0.00255073	7.76596	M.V.
40	TRUE	Empty	0.944	1	1	0.89	0.77	NCGC00180160-02!2-(3,4-dimethoxyphenoxy)-6-[(3,4,5-trihydroxyoxan-2-yl)oxymethyl]oxane-3,4,5-triol	INCHIKEY:BUKNGVJDVSRYIT-UHFFFAOYSA-N	C 19H 28O 12	448.2	5.95	0.0458181	9.7543	9.29447
41	TRUE	Empty	0.943	0.99	1	-	0.35	(1x,2x)-Guaiacylglycerol 2-glucoside	INCHIKEY:UKYKCLFPJXHNON-UHFFFAOYNA-N	C 16H 24O 10	376.1	7.46	0.000122851	7.18621	-4.96216
42	TRUE	Empty	0.943	0.98	1	-	0.3	(9R,13R)-10-oxo-11-phytoenoic acid	INCHIKEY:WKABMUFTMQMEAJ-HZPDHXFCSA-N	C 18H 30O 3	294.2	9.02	0.00856252	7.9029	7.51368
43	TRUE	Empty	0.943	0.99	0.99	-	0.87	(R)-14-Methyloxacyclotetradecan-2-one	INCHIKEY:FGDBANZBXSVCEG-UHFFFAOYNA-N	C 14H 26O 2	226.2	12.96	0.0685601	8.23168	8.12004
44	TRUE	Empty	0.942	0.98	1	-	0.86	(9xi,10xi,12xi)-9,10-Dihydroxy-12-octadecenoic acid	INCHIKEY:XEBKSQSGNGRGDW-JXMROGBWNA-N	C 18H 34O 4	314.2	2.32	0.0284531	8.04452	6.48852
45	TRUE	Empty	0.942	0.99	0.99	-	0.47	4-Hydroxy-5-(3',5'-dihydroxyphenyl)-valeric acid-O-methyl-O-glucuronide	INCHIKEY:NLJOFAILECLFIF-UHFFFAOYSA-N	C 18H 26O 12	434.1	7.02	0.00844277	7.53945	-6.33154
46	TRUE	Empty	0.942	0.99	0.99	-	0.8	N-methyl-2-oxoglutaramic acid	INCHIKEY:MOIJYNHJLPUMNX-UHFFFAOYSA-N	C 6H 9NO 4	159.1	7.83	0.690667	7.28568	7.13124
47	TRUE	Empty	0.942	1	0.99	-	0.18	Phenylethyl primeveroside	INCHIKEY:ZRGXCWYRIBRSQA-UHFFFAOYNA-N	C 19H 28O 10	416.2	5.83	0.0109699	9.4845	6.51616
48	TRUE	Empty	0.941	0.98	1	-	0.68	N-Benzoylaspartic acid	INCHIKEY:DJLTZJGULPLVOA-UHFFFAOYSA-N	C 11H 11NO 5	237.1	5.98	0.0309092	7.54481	8.0162
49	TRUE	Empty	0.941	0.97	1	0.9	0.71	Phytosphingosine	INCHIKEY:AERBNCYCJBRYDG-KSZLIROESA-N	C 18H 39NO 3	317.3	3.76	0.020145	8.51237	M.V.
50	TRUE	Empty	0.939	0.98	0.99	-	0.46	1,5-Dibutyl methyl hydroxycitrate	INCHIKEY:JRMBFEKUMNWOIE-UHFFFAOYSA-N	C 15H 26O 8	334.2	19.31	0.0692022	9.06189	8.54644
51	TRUE	Empty	0.939	0.99	0.99	-	0.05	13-KODE	INCHIKEY:JHXAZBBVQSRKJR-WWYDAZRDSA-N	C 18H 30O 3	294.2	7.79	0.0440064	6.00725	M.V.
52	TRUE	Empty	0.938	0.98	0.99	-	0.45	3,7,11,15-Tetramethyl-6,10,14-hexadecatrien-1-ol	INCHIKEY:ZKWFMIAGZQACFE-NWLVNBMCSA-N	C 20H 36O	292.3	18.11	0.0332042	7.57131	7.29741
53	TRUE	Empty	0.938	0.98	0.99	-	0.13	Hoduloside VIII	INCHIKEY:RDSYZBZVCGNHLV-MDWZMJQENA-N	C 46H 76O 18	916.5	6.14	0.0311465	8.04633	7.7587
54	TRUE	Empty	0.938	1	0.97	0.89	0.63	N-Acetyl-D-galactosaminitol	INCHIKEY:DWAICOVNOFPYLS-OSMVPFSASA-N	C 8H 17NO 6	223.1	8.98	0.0424601	6.56233	7.74924
55	TRUE	Empty	0.937	0.99	0.99	-	0.08	Etherolenic acid	INCHIKEY:QWRJRLCIDLDGLM-GTTHPXIQSA-N	C 18H 28O 3	292.2	8.5	0.0275179	8.05926	7.21421
56	TRUE	Empty	0.937	0.99	0.97	0.9	0.79	L-Asparagine	INCHIKEY:DCXYFEDJOCDNAF-REOHCLBHSA-N	C 4H 8N 2O 3	132.1	2.61	0.0297085	M.V.	8.60997
57	TRUE	Empty	0.936	0.99	0.98	-	0.3	Epicatechin 3-glucoside	INCHIKEY:YOVYWMDLYSJYPO-UHFFFAOYNA-N	C 21H 24O 11	452.1	5.71	0.0153229	8.234	8.40169
58	TRUE	Empty	0.936	0.99	0.98	-	0.17	Epicatechin-(2beta->7,4beta->6)-catechin	INCHIKEY:BEPYKTSNKZMROV-UHFFFAOYNA-N	C 30H 24O 12	576.1	7.69	0.0152788	-4.85357	6.62665
59	TRUE	Empty	0.936	0.99		-	0.69	S-Formylglutathione	INCHIKEY:FHXAGOICBFGEBF-BQBZGAKWSA-N	C 11H 17N 3O 7S	335.1	8	0.00352321	8.44541	8.66016
60	TRUE	Empty	0.936	1	0.98	-	0.53	Tricholomic acid	INCHIKEY:NTHMUJMQOXQYBR-UHFFFAOYSA-N	C 5H 8N 2O 4	160	8.97	0.0371568	8.36283	7.82641
61	TRUE	Empty	0.935	0.99	0.98	-	0.75	Aspartyl-Glutamine	INCHIKEY:GSMPSRPMQQDRIB-UHFFFAOYSA-N	C 9H 15N 3O 6	261.1	8.96	0.0225172	8.09026	9.7876
62	TRUE	Empty	0.935	1	0.98	-	0.44	formyl 2E,4Z,6Z-decatrienoate	INCHIKEY:DLNQRJFVXCCDKL-YXABPGESSA-N	C 11H 16O 2	180.1	3.93	0.0124668	8.78159	6.6268
63	TRUE	Empty	0.934	0.97	0.99	-	0.21	Mahaleboside	INCHIKEY:UMXDJWMIEHQSHF-UHFFFAOYNA-N	C 15H 16O 8	324.1	2.17	0.0128534	7.60225	7.86123
64	TRUE	Empty	0.933	0.98	0.98	-	0.48	10-Hydroxyloganin	INCHIKEY:GTEDLLYKAJRTNK-UMHDANERSA-N	C 17H 26O 11	406.1	7.21	0.000927681	7.38343	-5.95327
65	TRUE	Empty	0.932	1	0.97	-	0.88	Galactose	INCHIKEY:GZCGUPFRVQAUEE-KCDKBNATSA-N	C 6H 12O 6	180.1	8.69	0.00982111	-8.63308	9.63086
66	TRUE	Empty	0.932	0.97	0.99	-	0.35	N-.alpha.-(tert-Butoxycarbonyl)-L-histidine	INCHIKEY:AYMLQYFMYHISQO-QMMMGPOBSA-N	C 11H 17N 3O 4	255.1	8.06	0.0462593	7.79499	8.15616
67	TRUE	Empty	0.93	0.96	0.99	-	0.19	4-Feruloyl-1,5-quinolactone	INCHIKEY:OIGFDFULTVHQNZ-KJJWLSQTSA-N	C 17H 18O 8	350.1	6.52	0.000354746	7.36089	-5.26348
68	TRUE	Empty	0.93	0.99	0.97	-	0.79	Benzoylmalic acid	INCHIKEY:NVPJTXMOQCANSN-UHFFFAOYNA-N	C 11H 10O 6	238	8.21	0.014353	8.11162	8.28999
69	TRUE	Empty	0.929	1	0.97	-	0.65	2,6-Dimethoxy-4-propylphenol	INCHIKEY:YHEWWEXPVKCVFY-UHFFFAOYSA-N	C 11H 16O 3	196.1	4.35	0.0295222	7.70127	8.58543
70	TRUE	Empty	0.928	0.99	0.97	-	0.87	CDP-ribitol	INCHIKEY:DPJKHFICSGCNIR-HRENORGGSA-N	C 14H 25N 3O 15P 2	537.1	7.97	0.0283012	-7.93774	8.86336
71	TRUE	Empty	0.927	0.81	0.91	-	0.51	1,5-Dihydroxy-3-methoxy-2-prenylxanthone	INCHIKEY:INFMYEMPDJIILH-UHFFFAOYSA-N	C 19H 18O 5	326.1	8.11	3.81045e-05	8.91641	7.33014
72	TRUE	Empty	0.927	0.99	0.97	-	0.52	Bolusanthin	INCHIKEY:XCIMIGGTZKYBOR-UHFFFAOYSA-N	C 16H 14O 7	318.1	7.87	0.00336874	8.91673	7.52474
73	TRUE	Empty	0.924	0.99	0.96	-	0.24	4,6-Tricosanedione	INCHIKEY:OSWNBDSFXXEWTJ-UHFFFAOYSA-N	C 23H 44O 2	352.3	17.64	0.0546148	7.79768	7.65072
74	TRUE	Empty	0.924	1	0.9	0.91	0.95	Myristic acid	INCHIKEY:TUNFSRHWOTWDNC-UHFFFAOYSA-N	C 14H 28O 2	228.2	15.06	0.0118197	8.30878	8.1922
75	TRUE	Empty	0.923	1	0.96	-	0.08	Asterlingulatoside D	INCHIKEY:ZXFNMDBLCLWZIE-UHFFFAOYNA-N	C 57H 92O 25	1176.6	9.33	0.00391528	8.20876	8.41957
76	TRUE	Empty	0.922	1	0.96	-	0.52	Bancroftinone	INCHIKEY:DUTVTRPNMVUOIS-UHFFFAOYSA-N	C 11H 14O 4	210.1	9.48	0.0114174	7.33538	7.01229
77	TRUE	Empty	0.922	0.97	0.98	-	0.19	PA(20:3(8Z,11Z,14Z)/0:0)	INCHIKEY:LZSKMXWVALYCLG-CSLWLMPESA-N	C 23H 41O 7P	460.3	4.81	0.0169858	7.62934	-6.51144
78	TRUE	Empty	0.92	0.97	0.97	-	0.04	PA(20:3(8Z,11Z,14Z)/17:1(9Z))	INCHIKEY:CKNWDJBAPJHCFC-CNYOGFCDSA-N	C 40H 71O 8P	710.5	15.52	0.0144313	-5.89399	6.92131
79	TRUE	Empty	0.918	1	0.95	-	0.01	Gingerglycolipid B	INCHIKEY:UHISGSDYAIIBMO-HZJYTTRNNA-N	C 33H 58O 14	678.4	11.73	0.0015869	7.43892	7.81124
80	TRUE	Empty	0.916	0.99	0.96	-	0.01	4-Methylumbelliferyl .beta.-D-glucuronide	INCHIKEY:ARQXEQLMMNGFDU-JHZZJYKESA-N	C 16H 16O 9	352.1	3.25	0.0238016	6.76063	7.23252
81	TRUE	Empty	0.916	0.99	0.96	-	0.19	Glycerylphosphorylethanolamine	INCHIKEY:FRMZOWIQVCBEAC-UHFFFAOYSA-N	C 5H 14NO 6P	215.1	9.25	0.0213002	7.49317	8.0227
82	TRUE	Empty	0.914	0.98	0.96	-	0	(Z)-Resveratrol 3,4'-diglucoside	INCHIKEY:YGQPMDDXSJHKJT-UPHRSURJNA-N	C 26H 32O 13	552.2	7.5	0.0319204	6.82059	6.33188
83	TRUE	Empty	0.914	0.83	0.89	0.96	0.19	D-Ribose 5-phosphate	INCHIKEY:FNZLKVNUWIIPSJ-UHNVWZDZSA-N	C 5H 11O 8P	230	9.25	0.000857548	7.51823	-6.21291
84	TRUE	Empty	0.912	0.92	0.98	-	0.92	PI(O-18:0/0:0)	INCHIKEY:BDLQBUDICUCZRI-RDGQAVELSA-N	C 27H 55O 11P	586.3	16.47	0.00324698	7.91721	7.55736
85	TRUE	Empty	0.911	0.96	0.96	-	0.13	Myo-inositol-6-phosphate	INCHIKEY:INAPMGSXUVUWAF-WWHKVMGRSA-L	C 6H 11O 9P	258	8.3	0.423801	7.26989	7.65651
86	TRUE	Empty	0.908	0.98	0.95	-	0	10-hydroxy-16-oxo-hexadecanoic acid	INCHIKEY:VGISDMZERQFDDQ-UHFFFAOYSA-N	C 16H 30O 4	286.2	10.46	0.00476417	6.99367	6.75068
87	TRUE	Empty	0.908	0.96	0.95	-	0.68	Hydroxylated N-acetyl desmethyl frovatriptan	INCHIKEY:CDCOGHQILPZANE-UHFFFAOYNA-N	C 15H 19N 3O 3	289.1	8.42	0.0314572	M.V.	8.78016
88	TRUE	Empty	0.902	0.88	0.99	-	0.32	Inosine 2'-phosphate	INCHIKEY:PGZVUSPTYXQADT-KQYNXXCUSA-N	C 10H 13N 4O 8P	348	8.56	0.0278993	M.V.	7.49135
89	TRUE	Empty	0.899	0.94	0.95	-	0.16	Ala-Phe-Lys	INCHIKEY:WEZNQZHACPSMEF-UHFFFAOYSA-N	C 18H 28N 4O 4	364.2	19.57	0.0178731	8.15286	8.07887
90	TRUE	Empty	0.898	0.88	0.98	-	0.49	4'-Methyl-(-)-epigallocatechin 3-(4-methyl-gallate)	INCHIKEY:HFWSXNDMKGHKRD-VSVVGSIZNA-N	C 24H 22O 11	486.1	5.8	0.0433038	7.54556	9.1261
91	TRUE	Empty	0.897	0.96	0.94	-	0.21	15-deoxy-delta-12,14-PGD2	INCHIKEY:QUGBPWLPAUHDTI-PLGLXCLHSA-N	C 20H 30O 4	334.2	18.29	0.000552143	7.75938	7.47734
92	TRUE	Empty	0.893	0.84	1	-	0.61	3-[(2E)-2-(Nitromethylidene)hydrazinyl]benzoic acid	INCHIKEY:RASCTTJMDLLADA-WEVVVXLNSA-N	C 8H 7N 3O 4	209	5.2	0.0113126	7.62999	6.93569
93	TRUE	Empty	0.889	0.89	0.97	-	0.53	Formononetin 7-(6''-malonylglucoside)	INCHIKEY:RDTAGQKYPGLCBK-UHFFFAOYNA-N	C 25H 24O 12	516.1	5.39	0.00778228	-7.71688	8.6327
94	TRUE	Empty	0.887	0.94		-	0	D-Urobilin	INCHIKEY:DOKCNDVEPDZOJQ-MBTHVWNTSA-N	C 33H 40N 4O 6	588.3	9.06	0.0247302	6.55405	7.79223
95	TRUE	Empty	0.883	0.97	0.91	-	0.01	Tricosanedioic acid	INCHIKEY:QJXPRGZXRIIGOP-UHFFFAOYSA-N	C 23H 44O 4	384.3	16.43	0.0150706	6.58221	5.41063
96	TRUE	Empty	0.877	0.82	0.98	-	0.3	PI 42:7	INCHIKEY:OQVHMSJESJFKSW-VOZRZZGBNA-N	C 51H 85O 13P	936.6	18.03	0.0439696	7.511	7.27701
97	TRUE	Empty	0.873	0.9	0.93	-	0.34	5,7,3',4',5'-Pentahydroxy-3,6,8-trimethoxyflavone	INCHIKEY:STOZTZBHYTVXHP-UHFFFAOYSA-N	C 18H 16O 10	392.1	8.36	0.0165337	6.68908	8.47569
98	TRUE	Empty	0.873	0.98	0.89	-	0.16	MG(22:1(13Z)/0:0/0:0)	INCHIKEY:ZXNAIPHYBVMMPY-DHSLYTQISA-N	C 25H 48O 4	412.4	15.83	0.00477291	7.56548	-5.13699
99	TRUE	Empty	0.872	0.89	0.94	-	0.29	Apigenin 7-(2''-acetyl-6''-methylglucuronide)	INCHIKEY:UIAVWDXUPQFAJB-FZCUMBRGSA-N	C 24H 22O 12	502.1	6.56	0.0138101	7.16536	8.01787
100	TRUE	Empty	0.872	0.99	0.89	-	0.92	L-glucitol	INCHIKEY:FBPFZTCFMRRESA-FSIIMWSLSA-N	C 6H 14O 6	182.1	8.42	0.0234337	7.70248	M.V.
101	TRUE	Empty	0.871	0.83	0.97	-	0.3	Aloe emodin w-acetate	INCHIKEY:FUECAILUKAJTBR-UHFFFAOYSA-N	C 17H 12O 6	312.1	6.77	0.00156136	7.73199	6.35991
102	TRUE	Empty	0.871	0.81	0.97	-	0.42	Linderoflavone A	INCHIKEY:QFVKOJSHXTWDPB-UHFFFAOYSA-N	C 18H 14O 8	358.1	11.75	0.04133	6.99061	8.67297
103	TRUE	Empty	0.867	0.89	0.93	-	0.08	Epicatechin 3-O-(4-methylgallate)	INCHIKEY:BXDRTHBTGNNTEW-VSVVGSIZNA-N	C 23H 20O 10	456.1	5.79	0.00153871	-6.71094	8.1012
104	TRUE	Empty	0.864	0.88	0.93	-	0.36	Galiposin	INCHIKEY:AFLGTFMAMFQGGU-GHXNOFRVSA-N	C 17H 12O 6	312.1	6.68	0.0140031	M.V.	7.88007
105	TRUE	Empty	0.863	0.99	0.87	-	0.71	Onitin	INCHIKEY:GCMUHPCLXBXQDH-UHFFFAOYSA-N	C 15H 22O 2	234.2	14.32	0.0315573	7.40986	7.17135
106	TRUE	Empty	0.862	1	0.87	-	0.8	beta-(2-Methoxyphenoxy)-lactic acid	INCHIKEY:MXVBBOLVTSAHEX-UHFFFAOYNA-N	C 10H 12O 5	212.1	2.05	0.0129459	8.23818	-7.28278
107	TRUE	Empty	0.861	0.93	0.9	-	0.96	N-Acetylhistidine	INCHIKEY:KBOJOGQFRVVWBH-UHFFFAOYSA-N	C 8H 11N 3O 3	197.1	8.67	0.043423	7.92632	8.13426
108	TRUE	Empty	0.856	0.75	0.98	-	0.07	PE(22:5(4Z,7Z,10Z,13Z,16Z)/16:0)	INCHIKEY:IGLDAKIUZPDOCH-XHZSNTCFSA-N	C 43H 76NO 8P	765.5	19.61	0.00132712	M.V.	8.26129
109	TRUE	Empty	0.856	0.93	0.89	-	0.03	Ustiloxin D	INCHIKEY:GDXLZSYACWZHOC-UHFFFAOYNA-N	C 23H 34N 4O 8	494.2	6.59	0.0123667	6.90153	-5.53261
110	TRUE	Empty	0.853	0.98	0.86	-	0.66	L-2-Amino-5-hydroxypentanoic acid	INCHIKEY:CZWARROQQFCFJB-UHFFFAOYNA-N	C 5H 11NO 3	133.1	8.77	0.0140897	6.9902	7.65505
111	TRUE	Empty	0.851	0.97	0.81	0.84	0.94	Glu-Gln	INCHIKEY:MGHKSHCBDXNTHX-WDSKDSINSA-N	C 10H 17N 3O 6	275.1	8.72	0.0328387	M.V.	6.96916
112	TRUE	Empty	0.847	0.99	0.85	-	0.7	Bovolide	INCHIKEY:MTQPZHNZYWAXEH-JXMROGBWSA-N	C 11H 16O 2	180.1	3.05	0.00548244	-7.68853	8.69536
113	TRUE	Empty	0.846	1	0.85	-	0.33	7-Hexyl-2-oxepanone	INCHIKEY:FRTMRFCNTDDSOB-UHFFFAOYNA-N	C 12H 22O 2	198.2	12.44	0.0369957	7.41552	6.43949
114	TRUE	Empty	0.845	0.78	0.95	-	0	Erysothiopine	INCHIKEY:HNDYDGVKLJMGCM-UHFFFAOYSA-N	C 19H 21NO 7S	407.1	6.43	0.0445496	7.96689	7.59012
115	TRUE	Empty	0.845	0.94	0.87	-	0.01	MLS001142919-01!	INCHIKEY:CNJJMBLXGCDBGS-LQWHRVPQSA-N	C 25H 31N 5O 4S	497.2	8.12	0.0107688	-6.77333	7.74068
116	TRUE	Empty	0.839	0.89	0.89	-	0.33	Dihydro-2,4,6-tris(2-methylpropyl)-4h-1,3,5-dithiazine	INCHIKEY:RQGPQWUKHADVPF-UHFFFAOYNA-N	C 15H 31NS 2	289.2	15.33	0.0331658	8.9033	-8.19159
117	TRUE	Empty	0.838	1	0.83	-	0.61	3,5,7-Trihydroxyflavone 3-glucoside-8-sulfate	INCHIKEY:IFHBLQSSJDMWJS-DLBNBXSVSA-N	C 21H 20O 13S	512.1	6.36	0.000416461	8.10311	-6.58122
118	TRUE	Empty	0.838	0.82	0.92	-	0.85	Methylene thiocyanate	INCHIKEY:JWZXKXIUSSIAMR-UHFFFAOYSA-N	C 3H 2N 2S 2	130	7.83	0.0307455	-7.71222	8.54329
119	TRUE	Empty	0.834	0.88	0.88	-	0.26	Gamma-Glutamyltyrosine	INCHIKEY:VVLXCWVSSLFQDS-QWRGUYRKSA-N	C 14H 18N 2O 6	310.1	5.87	0.00576967	6.35846	8.23847
120	TRUE	Empty	0.833	0.68	0.98	-	0.03	Artocommunol CA	INCHIKEY:MWXGNEFXTSBFQH-UHFFFAOYSA-N	C 26H 24O 6	432.2	6.01	0.0242631	7.12528	M.V.
121	TRUE	Empty	0.825	0.82	0.9	-	0.76	2-(4-Methyl-5-thiazolyl)ethyl octanoate	INCHIKEY:OGJATLSJIMPQBD-UHFFFAOYSA-N	C 14H 23NO 2S	269.1	6.22	0.0106949	7.58793	-6.57165
122	TRUE	Empty	0.824	0.7	0.96	-	0.13	Piperenol A triacetate	INCHIKEY:UGMVPWAZGUPKPL-UHFFFAOYNA-N	C 27H 26O 10	510.2	6.55	0.0258369	M.V.	6.42091
123	TRUE	Empty	0.823	0.81	0.91	-	0.43	Asparaginyl-Arginine	INCHIKEY:JSLGXODUIAFWCF-UHFFFAOYSA-N	C 10H 20N 6O 4	288.2	11.39	0.0328527	8.45592	M.V.
124	TRUE	Empty	0.82	0.83	0.89	-	0.53	Homolanthionine	INCHIKEY:CMACTJDDABKNPX-UHFFFAOYSA-N	C 8H 16N 2O 6S	268.1	3.64	0.032326	M.V.	8.91743
125	TRUE	Empty	0.818	0.81	0.9	-	0.21	Neobanol	INCHIKEY:QVTNCCTYKIEOIS-UHFFFAOYSA-N	C 18H 12O 6	324.1	6.27	0.00118336	-6.45655	7.71292
126	TRUE	Empty	0.815	0.72	0.94	-	0.16	Euchrenone b3	INCHIKEY:AOFNFHUUIWLAAW-UHFFFAOYSA-N	C 27H 26O 7	462.2	6.04	0.0174003	7.81099	-6.87601
127	TRUE	Empty	0.811	0.59	1	-	0.01	PI(P-16:0/0:0)	INCHIKEY:MTLRNAKDFBBVEQ-BEURSELSSA-N	C 25H 49O 11P	556.3	10.29	0.00465875	6.42535	5.52044
128	TRUE	Empty	0.81	0.59	0.99	-	0.07	Boldine	INCHIKEY:LZJRNLRASBVRRX-UHFFFAOYSA-N	C 19H 21NO 4	327.1	8.56	0.0391804	6.55073	7.84578
129	TRUE	Empty	0.806	0.88	0.84	-	0.65	Allithiamine	INCHIKEY:WNCAVNGLACHSRZ-SDNWHVSQSA-N	C 15H 22N 4O 2S 2	354.1	8.38	0.0394864	8.64296	9.72001
130	TRUE	Empty	0.803	0.74	0.91	-	0.7	N-Methylnicotinic acid cation	INCHIKEY:WWNNZCOKKKDOPX-UHFFFAOYSA-O	C 7H 8NO 2	138.1	18.19	9.1518e-05	8.85535	M.V.
131	TRUE	Empty	0.794	0.84	0.84	-	0.03	Kanzonol N	INCHIKEY:ANRYVYXUTFJPOR-UHFFFAOYNA-N	C 22H 24O 6	384.2	2.57	0.0375591	M.V.	8.65307
132	TRUE	Empty	0.79	0.82	0.85	-	0.48	Arginyl-Asparagine	INCHIKEY:JSLGXODUIAFWCF-UHFFFAOYSA-N	C 10H 20N 6O 4	288.2	2.08	0.015244	8.31884	M.V.
133	TRUE	Empty	0.786	0.53	0.99	-	0.24	Apigenin 7-glucuronide-4'-(6''-malonylglucoside)	INCHIKEY:KWPZKEPPMDOLFK-DULDZXOESA-N	C 30H 30O 19	694.1	2.13	0.0178546	7.01996	7.8651
134	TRUE	Empty	0.782	0.87	0.81	-	0.01	Deltarasin	INCHIKEY:LTZKEDSUXKTTTC-KXQOOQHDSA-N	C 40H 37N 5O	603.3	11.96	0.00708464	-4.87308	6.62189
135	TRUE	Empty	0.772	0.81	0.83	-	0.54	Pelargonidin 3-p-coumarylglucoside	INCHIKEY:VZPBBOAZFCREMQ-RYHKZSCWSA-O	C 30H 27O 12	579.2	6.35	0.0412964	7.73037	7.14438
136	TRUE	Empty	0.765	0.86	0.79	-	0.02	7-Hydroxy-6,8-di-C-methylflavanone 7-O-arabinoside	INCHIKEY:RLPHVYYMPXVDER-WGPZSCIYSA-N	C 22H 24O 7	400.2	2.13	0.0200969	M.V.	7.48306
137	TRUE	Empty	0.763	0.99	0.73	-	0.83	2,6-Xylidine	INCHIKEY:UFFBMTHBGFGIHF-UHFFFAOYSA-N	C 8H 11N	121.1	2.38	0.00325558	10.5089	M.V.
138	TRUE	Empty	0.759	0.94	0.75	-	0.34	Hovenitin I	INCHIKEY:MIEZPHMCERQLMT-UHFFFAOYNA-N	C 16H 14O 8	334.1	3.26	0.0196657	-5.31735	8.69814
139	TRUE	Empty	0.758	0.97	0.73	-	0.25	2-Carboxy-4-dodecanolide	INCHIKEY:FMXVFWDIAZJILA-UHFFFAOYNA-N	C 13H 22O 4	242.2	18.31	0.00532731	8.42088	8.20811
140	TRUE	Empty	0.751	0.75	0.83	-	0.01	3-O-(Xylb1-3Glcb1-2(Xylb1-3)Glcb1-4Galb)-(25R)-12-oxo-5alpha-spirostan-3beta-ol	INCHIKEY:JPSRBSOLFHGRCF-GEQQGYQHSA-N	C 56H 92O 27	1196.6	8.38	0.00106411	7.72435	M.V.
141	TRUE	Empty	0.743	0.75	0.81	-	0.61	Benzoic acid, 4-benzoyl	INCHIKEY:IFQUPKAISSPFTE-UHFFFAOYSA-N	C 14H 10O 3	226.1	2.92	0.00392169	M.V.	8.70108
142	TRUE	Empty	0.741	0.86	0.76	-	0.25	Pregnenolone sulfate	INCHIKEY:DIJBBUIOWGGQOP-OZIWPBGVSA-N	C 21H 32O 5S	396.2	17.15	0.0333108	8.63007	8.44392
143	TRUE	Empty	0.74	0.74	0.81	-	0.15	Medicarpin 3-O-(6'-malonylglucoside)	INCHIKEY:BQAJKXKYTQTBDK-UHFFFAOYNA-N	C 25H 26O 12	518.1	9.74	0.0094681	7.88067	8.26564
144	TRUE	Empty	0.733	0.54	0.9	-	0.05	Acetophenazine	INCHIKEY:WNTYBHLDCKXEOT-UHFFFAOYSA-N	C 23H 29N 3O 2S	411.2	4.62	4.2351e-05	-5.71984	8.62213
145	TRUE	Empty	0.73	0.99	0.99	0.47	0.62	6-Hydroxycoumarin	INCHIKEY:CJIJXIFQYOPWTF-UHFFFAOYSA-N	C 9H 6O 3	162	10.43	0.00403027	8.17057	8.9467
146	TRUE	Empty	0.727	0.94	0.7	-	0.03	GDP-4-Dehydro-6-L-deoxygalactose	INCHIKEY:PNHLMHWWFOPQLK-GTXIGXBOSA-N	C 16H 23N 5O 15P 2	587.1	5.82	0.000867682	-6.32434	8.03369
147	TRUE	Empty	0.724	0.88	0.72	-	0.02	Ephedrannin A	INCHIKEY:GPBSBBVDERLESN-KWRBWDCJNA-N	C 30H 20O 11	556.1	9.58	0.0365903	6.5235	8.35257
148	TRUE	Empty	0.716	0.75	0.78	-	0.81	Coriandrone C	INCHIKEY:KFOFBVHBCDBMPK-UHFFFAOYSA-N	C 13H 10O 5	246.1	5.01	0.0413109	M.V.	8.59044
149	TRUE	Empty	0.709	0.69	0.79	-	0.67	2,3-Diaminosalicylic acid	INCHIKEY:CGKSFNAGRBJNJO-UHFFFAOYSA-N	C 7H 8N 2O 3	168.1	8.83	0.0329267	M.V.	7.02834
150	TRUE	Empty	0.709	1	0.99	0.42	0.66	6-Sialylgalactose	INCHIKEY:ZWJUGLBUMFWRAR-TXFPQSCTSA-N	C 17H 29NO 14	471.2	8.97	0.0337847	7.80097	8.54782
151	TRUE	Empty	0.703	0.54	0.86	-	0.91	3,4-Methylenedioxybenzoic acid	INCHIKEY:VDVJGIYXDVPQLP-UHFFFAOYSA-N	C 8H 6O 4	166	6.36	0.00748871	7.96399	M.V.
152	TRUE	Empty	0.701	0.6	0.82	-	0.03	N'-((8-Hydroxy-2-quinolinyl)methylene)-3-phenylpropanohydrazide	INCHIKEY:IBBFFYQBJRPFRH-DEDYPNTBSA-N	C 19H 17N 3O 2	319.1	8.49	0.00342911	7.32827	8.60289
