# Supplementary material
Source: publisher figshare collection journal article supplement (https://tandf.figshare.com/articles/dataset/_/9798299)
Supplement: Supplementary file 3 [file 1 › Table S10 - Copy.xlsx]

## Sheet: TableS10
Table S10. Differentially accumulated metabolites under salinity and silicon treatment with significant quantities (p, q ≤ 0.05) in salinity Leaf (NL), salinity with silicon-treated leaf (NSiL). Values are shown as the log10 of the precursor intensity. M.V. refers to the missing values of MS data.
#	Visible	Star	ID Score	Mass Accuracy Score	Isotopic Distribution Score	MS2 Score	XIC Score	Analyte Name	Accession Number	Molecular Formula	Molecular Weight	Retention Time (min)	t-test (Log10 Precursor Intensity) Comparison Level: Sample Biological Replicate Level: MS Sample	NL	NSiL
1	TRUE	Empty	1	0.99	1	-	0.78	Juglone glucoside	INCHIKEY:AAYYJBZZHJNMEO-UHFFFAOYNA-N	C 16H 16O 8	336.1	2.16	0.0373553	8.95445	8.54646
2	TRUE	Empty	0.995	1	0.99	1	0.25	Astragalin	INCHIKEY:JPUKWEQWGBDDQB-QSOFNFLRSA-N	C 21H 20O 11	448.1	4.85	0.0438103	8.16524	8.39107
3	TRUE	Empty	0.994	0.99	1	0.99	0.99	Dibutyl phthalate	INCHIKEY:DOIRQSBPFJWKBE-UHFFFAOYSA-N	C 16H 22O 4	278.2	16.13	0.0315163	10.0883	10.0112
4	TRUE	Empty	0.979	1	0.94	1	0	2'-O-Methyladenosine	INCHIKEY:FPUGCISOLXNPPC-IOSLPCCCSA-N	C 11H 15N 5O 4	281.1	5.58	0.0480706	7.54538	7.8429
5	TRUE	Empty	0.968	1	0.97	0.96	0.7	NEPSILON,NEPSILON,NEPSILON-TRIMETHYLLYSINE	INCHIKEY:MXNRLFUSFKVQSK-UHFFFAOYSA-N	C 9H 20N 2O 2	188.2	2.06	0.0485311	8.02717	7.86776
6	TRUE	Empty	0.948	1	1	-	0	Benzyl gentiobioside	INCHIKEY:LLEMMFPELBNINR-UHFFFAOYNA-N	C 19H 28O 11	432.2	6.59	0.00870391	5.74366	M.V.
7	TRUE	Empty	0.948	1	1	-	0.36	Matteucinol 7-O-glucoside	INCHIKEY:HPXOUFFMSLZOLE-UJHARDEVSA-N	C 24H 28O 10	476.2	5.69	0.0456361	8.12499	7.99284
8	TRUE	Empty	0.946	1	1	-	0.13	LPA(0:0/18:2(9Z,12Z))	INCHIKEY:PALVOIADDFXQGT-KKFOGOCZSA-N	C 21H 39O 7P	434.2	9.36	0.000821285	8.37758	8.15031
9	TRUE	Empty	0.946	1	0.99	-	0.01	Phenylethyl primeveroside	INCHIKEY:ZRGXCWYRIBRSQA-UHFFFAOYNA-N	C 19H 28O 10	416.2	6.2	0.0381852	8.08899	7.92195
10	TRUE	Empty	0.944	0.99	1	-	0.68	Cyanidin 3-O-(coumaroylglucoside)	INCHIKEY:QAOBEOXFSUJDJL-SHPGVJHPSA-O	C 30H 27O 13	595.1	2.63	0.00658594	7.80617	7.07736
11	TRUE	Empty	0.944	0.97	0.95	0.93	0.16	Salicin	INCHIKEY:NGFMICBWJRZIBI-SYLRKERUSA-N	C 13H 18O 7	286.1	4.78	0.0490744	6.95215	-6.08302
12	TRUE	Empty	0.943	1	0.99	-	0.69	Retrocalamin	INCHIKEY:HMNKPIJMXBZMJF-IAXGIENSNA-N	C 24H 30O 9	462.2	8.77	0.0134456	9.29303	9.09071
13	TRUE	Empty	0.942	1	0.99	-	0.08	Spongioside A	INCHIKEY:CMVKGKGHOKTWFO-OGUOSZSFSA-N	C 51H 86O 21	1034.6	8.81	0.0244867	7.03375	-5.36542
14	TRUE	Empty	0.94	0.98	1	-	0.11	NCGC00380872-01!(2R,3S)-2-[(3,4-dihydroxyphenyl)methyl]-2-hydroxy-3-[(E)-3-(3-hydroxy-4-methoxyphenyl)prop-2-enoyl]oxybutanedioic acid	INCHIKEY:YVHLLZXSGPDXOA-ZHBFVYIWSA-N	C 21H 20O 11	448.1	6.77	0.0101354	7.10443	M.V.
15	TRUE	Empty	0.939	0.99	0.99	-	0.46	10-Hydroxyloganin	INCHIKEY:GTEDLLYKAJRTNK-UMHDANERSA-N	C 17H 26O 11	406.1	4.51	0.033902	7.87929	7.72237
16	TRUE	Empty	0.939	0.99	0.99	-	0.92	L-2-Amino-3-(1-pyrazolyl)propanoic acid	INCHIKEY:PIGOPELHGLPKLL-UHFFFAOYNA-N	C 6H 9N 3O 2	155.1	11.75	0.000488265	-5.72602	9.5155
17	TRUE	Empty	0.936	1	0.98	-	0.3	16-methyl-6Z,9Z,12Z-heptadecatrienoic acid	INCHIKEY:KGQONBKICZUGHP-LJFLDRDWSA-N	C 18H 30O 2	278.2	13.52	0.047023	8.18842	7.59214
18	TRUE	Empty	0.936	0.99	0.98	-	0.61	Ascorbyl stearate	INCHIKEY:LITUBCVUXPBCGA-UHFFFAOYSA-N	C 24H 42O 7	442.3	14.09	0.0374594	9.05028	8.63895
19	TRUE	Empty	0.935	0.98	0.99	-	0.67	5S,15S-diHPETE	INCHIKEY:PCIOUQYHTPPZEM-BVHTXILBSA-N	C 20H 32O 6	368.2	11.53	0.035416	8.13457	7.97539
20	TRUE	Empty	0.929	0.99	0.97	-	0.03	26-Desglucoavenacoside B	INCHIKEY:FIGFQPRWCDDAGD-UHFFFAOYNA-N	C 51H 82O 23	1062.5	11.79	0.0448615	7.39083	7.90909
21	TRUE	Empty	0.924	0.97	0.97	-	0.84	(E)-2-Methyl-2-buten-1-ol O-beta-D-Glucopyranoside	INCHIKEY:RQSHFEQQQBCYNX-ZZXKWVIFNA-N	C 11H 20O 6	248.1	2.86	0.0171723	8.6215	8.41693
22	TRUE	Empty	0.919	0.96	0.97	-	0.78	11-deoxy-11-methylene-15-keto-PGD2	INCHIKEY:SAAKCJFTIGHOEX-WQXLGBCHSA-N	C 21H 32O 4	348.2	17.45	0.00816674	10.0038	9.91908
23	TRUE	Empty	0.918	1	0.95	-	0.01	Gingerglycolipid B	INCHIKEY:UHISGSDYAIIBMO-HZJYTTRNNA-N	C 33H 58O 14	678.4	11.73	0.0306522	8.27982	8.16185
24	TRUE	Empty	0.917	0.92	0.99	-	0.65	beta-Ionol	INCHIKEY:CNOPDZWOYFOHGN-BQYQJAHWNA-N	C 13H 22O	194.2	4.97	0.241989	8.13179	-7.11734
25	TRUE	Empty	0.912	0.92	0.98	-	0.92	PI(O-18:0/0:0)	INCHIKEY:BDLQBUDICUCZRI-RDGQAVELSA-N	C 27H 55O 11P	586.3	16.47	0.000644431	9.14648	8.25595
26	TRUE	Empty	0.911	1	0.94	-	0	Candesartan O-glucuronide	INCHIKEY:IQMPSFXZXNRDMY-QJQVECKKNA-N	C 30H 28N 6O 9	616.2	6.19	0.000641392	7.14794	6.73102
27	TRUE	Empty	0.911	0.99	0.95	-	0.03	Pseudoprotogracillin	INCHIKEY:NRLDFEXARSJLFF-DHCZVXRMSA-N	C 52H 86O 22	1062.6	9.15	0.0431754	5.99036	6.67181
28	TRUE	Empty	0.908	0.98	0.95	-	0.36	1-Methoxy-1-(2,4,5-trimethoxyphenyl)-2-propanol	INCHIKEY:IXNRGYSRFBDZLB-UHFFFAOYNA-N	C 13H 20O 5	256.1	18.96	0.00140409	M.V.	8.73118
29	TRUE	Empty	0.906	0.97	0.95	-	0.32	9S,12S,13S-trihydroxy-10E,15Z-octadecadienoic acid	INCHIKEY:MKYUCBXUUSZMQB-SZTSADAQSA-N	C 18H 32O 5	328.2	5.95	0.0216883	6.45343	7.08139
30	TRUE	Empty	0.905	0.99	0.94	-	0	Riesling acetal	INCHIKEY:SJZGKFZUNCXEEW-UHFFFAOYNA-N	C 13H 22O 3	226.2	6.07	0.025127	6.90306	6.06834
31	TRUE	Empty	0.904	0.96	0.95	-	0.48	3-hydroxymethyl-glutaric acid	INCHIKEY:IEPDKRIDROAXQP-UHFFFAOYSA-N	C 6H 10O 5	162.1	13.52	0.00120335	8.28408	M.V.
32	TRUE	Empty	0.903	1	0.93	-	0.19	9Z-Dodecenal	INCHIKEY:QGUDMPDYXLMJNK-ARJAWSKDSA-N	C 12H 22O	182.2	13.08	0.0127302	7.16892	7.3203
33	TRUE	Empty	0.903	0.98	0.94	-	0.74	D-Histidine	INCHIKEY:HNDVDQJCIGZPNO-RXMQYKEDSA-N	C 6H 9N 3O 2	155.1	13.15	0.0427721	9.26055	-8.57619
34	TRUE	Empty	0.899	0.99	0.93	-	0.56	2beta,7alpha,12alpha-Trihydroxy-3-oxo-5beta-cholan-24-oic Acid	INCHIKEY:ORAGCKFNLGDCMP-NKFQCJGASA-N	C 24H 38O 6	422.3	13.53	0.0250012	8.13088	7.61442
35	TRUE	Empty	0.899	0.88	0.98	-	0.48	Glu-Thr-Arg	INCHIKEY:TWYSSILQABLLME-UHFFFAOYSA-N	C 15H 28N 6O 7	404.2	7.95	0.0219912	7.27883	7.6035
36	TRUE	Empty	0.885	0.6	0.87	0.99	0.65	NCGC00180397-02!4-(2,4-dihydroxy-3,5-dimethylbenzoyl)oxy-2-hydroxy-3,5-dimethylbenzoic acid	INCHIKEY:WKHWTIZYRUWECB-UHFFFAOYSA-N	C 18H 18O 7	346.1	8.22	0.0165401	8.23904	8.72268
37	TRUE	Empty	0.878	0.94	0.92	-	0.1	(R)-2-Hydroxyhexadecanoic acid	INCHIKEY:JGHSBPIZNUXPLA-UHFFFAOYNA-N	C 16H 32O 3	272.2	9.91	0.0135923	7.70844	8.05275
38	TRUE	Empty	0.877	0.81	0.98	-	0.75	Luteolin 7-lactate	INCHIKEY:RWLCWWWLTRAVKI-UHFFFAOYSA-N	C 18H 14O 8	358.1	7.84	0.0046675	-5.88108	6.91411
39	TRUE	Empty	0.877	0.88	0.95	-	0.49	Retinyl beta-glucuronide	INCHIKEY:IYHVRAMISWFIRU-GMBUFXMQSA-N	C 26H 38O 7	462.3	13.53	0.0397925	8.62424	8.30138
40	TRUE	Empty	0.869	0.8	0.98	-	0.1	1-Acetoxy-2-hydroxy-5,12,15-heneicosatrien-4-one	INCHIKEY:YLWJMUPPJKELEC-RSWURYEXSA-N	C 23H 38O 4	378.3	16.61	0.0194435	7.74713	7.92053
41	TRUE	Empty	0.868	0.9	0.93	-	0.03	Symmetric dimethylarginine	INCHIKEY:HVPFXCBJHIIJGS-LURJTMIESA-N	C 8H 18N 4O 2	202.1	3.24	0.028515	7.73356	6.54786
42	TRUE	Empty	0.866	0.97	0.89	-	0.72	3alpha,12alpha-Dihydroxy-5beta-chola-7,9(11)-dien-24-oic Acid	INCHIKEY:MHMJDFLOHGJHIJ-UMNDTTGPSA-N	C 24H 36O 4	388.3	12.77	0.00229911	8.29821	6.94302
43	TRUE	Empty	0.862	1	0.87	-	0.8	beta-(2-Methoxyphenoxy)-lactic acid	INCHIKEY:MXVBBOLVTSAHEX-UHFFFAOYNA-N	C 10H 12O 5	212.1	2.05	0.00391013	8.61284	8.39465
44	TRUE	Empty	0.86	0.76	0.99	-	0.26	Anthenoside A	INCHIKEY:RNKLRQYEPYNQHD-NSMQWETHSA-N	C 38H 65NO 9	679.5	18.27	0.0159879	M.V.	8.2887
45	TRUE	Empty	0.857	0.93	0.9	-	0.5	Dimetan	INCHIKEY:ITEQSCBLCCNACE-UHFFFAOYSA-N	C 11H 17NO 3	211.1	3	0.0147401	8.06546	7.63474
46	TRUE	Empty	0.841	0.8	0.94	-	0.06	PG 26:7	INCHIKEY:NSPLNLOPJQCNFR-QNKKZEFYSA-N	C 32H 49O 10P	624.3	12.18	0.0169405	6.93609	5.77428
47	TRUE	Empty	0.839	0.99	0.84	-	0	(9R,10S,12Z)-9,10-Dihydroxy-8-oxo-12-octadecenoic acid	INCHIKEY:NIOKCFABUMZUDL-RMKNXTFCNA-N	C 18H 32O 5	328.2	6.87	0.0226433	5.9595	8.18372
48	TRUE	Empty	0.837	0.84	0.91	-	0.4	Formononetin 7-(6''-methylmalonylglucoside)	INCHIKEY:DQNRUSGVMUYAHO-UHFFFAOYNA-N	C 26H 26O 12	530.1	8.76	0.0390173	8.02898	8.32243
49	TRUE	Empty	0.824	0.92	0.85	-	0	PI(O-20:0/0:0)	INCHIKEY:FHYCYULARSUKFT-IRACFBFSSA-N	C 29H 59O 11P	614.4	16.48	0.0080919	6.98042	-5.60526
50	TRUE	Empty	0.785	0.52	0.99	-	0.11	Myricetin 3-(2''-galloylglucoside)	INCHIKEY:QYLKPOARSREGIU-IZPYGPCZSA-N	C 28H 24O 17	632.1	4.13	0.000665139	M.V.	8.1075
51	TRUE	Empty	0.784	1	0.66	0.46	0.66	2-Oxoarginine	INCHIKEY:ARBHXJXXVVHMET-UHFFFAOYSA-N	C 6H 11N 3O 3	173.1	8.86	4.21582e-08	M.V.	8.00907
52	TRUE	Empty	0.784	1	0.66	0.46	0.66	4-Imidazolone-5-propionic acid	INCHIKEY:ARBHXJXXVVHMET-UHFFFAOYSA-N	C 6H 11N 3O 3	173.1	8.86	4.21582e-08	M.V.	8.00907
53	TRUE	Empty	0.783	0.52	0.99	-	0.41	Methyl 2,3,6-tri-O-galloyl-beta-D-glucopyranoside	INCHIKEY:ITRFLIAWJCCQTF-UHFFFAOYNA-N	C 28H 26O 18	650.1	2.5	0.0180561	M.V.	7.30797
54	TRUE	Empty	0.779	0.93	0.78	-	0.82	(-)-1-Methylpropyl 1-propenyl disulfide	INCHIKEY:IOVUOUZQSDBAQN-GQCTYLIANA-N	C 7H 14S 2	162.1	19	0.0234873	M.V.	8.88136
55	TRUE	Empty	0.729	0.54	0.86	0.06	0.91	Phthalic acid	INCHIKEY:XNGIFLGASWRNHJ-UHFFFAOYSA-N	C 8H 6O 4	166	6.36	0.000843278	M.V.	8.26467
56	TRUE	Empty	0.729	0.54	0.86	0.06	0.91	Terephthalic acid	INCHIKEY:XNGIFLGASWRNHJ-UHFFFAOYSA-N	C 8H 6O 4	166	6.36	0.000843278	M.V.	8.26467
57	TRUE	Empty	0.721	1	0.66	-	0.66	Imidazolelactic acid	INCHIKEY:JTYMXXCJQKGGFG-UHFFFAOYSA-N	C 6H 8N 2O 3	156.1	8.86	0.00462006	M.V.	8.04209
58	TRUE	Empty	0.704	0.56	0.95	0.59	0.65	Cepharanthine	INCHIKEY:YVPXVXANRNDGTA-FQLXRVMXSA-N	C 37H 38N 2O 6	606.3	19.64	0.0401054	8.9937	9.23909
