# Supplementary material
Source: publisher figshare collection journal article supplement (https://tandf.figshare.com/articles/dataset/_/9798299)
Supplement: Supplementary file 3 [file 1 › Table S11 - Copy.xlsx]

## Sheet: Table S11
Table S11. Differentially accumulated metabolites under salinity and silicon treatment with significant quantities (p, q ≤ 0.05) in salinity root (NR), salinity with silicon-treated root (NSiR). Values are shown as the log10 of the precursor intensity.
#	Visible	Star	ID Score	Mass Accuracy Score	Isotopic Distribution Score	MS2 Score	XIC Score	Analyte Name	Accession Number	Molecular Formula	Molecular Weight	Retention Time (min)	t-test (Log10 Precursor Intensity) Comparison Level: Sample Biological Replicate Level: MS Sample	NR	NSiR
1	TRUE	Empty	1	1	0.99	-	0.99	(R)-2-ethylmalic acid	INCHIKEY:YVYGHRNLPUMVBU-UHFFFAOYSA-N	C 6H 10O 5	162.1	8.25	0.0480633	8.62456	8.9815
2	TRUE	Empty	1	0.99	0.99	-	0.72	N-(1-Deoxy-1-fructosyl)glycine	INCHIKEY:UKKRCTOBKMVJGX-GCPSPYDWNA-N	C 8H 15NO 7	237.1	8.03	0.49845	7.48808	7.95631
3	TRUE	Empty	1	1	1	0.95	0.56	PE 36:4	INCHIKEY:UCFUYIHIAGCQOA-DDVYVDFVNA-N	C 41H 74NO 8P	739.5	13.96	0.0251588	8.14271	7.89381
4	TRUE	Empty	1	1	1	0.94	0.36	Prosapogenin A	INCHIKEY:HDXIQHTUNGFJIC-FOAHKCLGSA-N	C 39H 62O 12	722.4	12.37	0.00340081	7.88264	8.37161
5	TRUE	Empty	1	1	1	-	0.61	Robinetinidol-(4alpha->8)-catechin-(6->4alpha)-robinetinidol	INCHIKEY:QZNRDKYJASOYMZ-QBCCLPOMSA-N	C 45H 38O 18	866.2	7.09	6.61146e-05	7.12734	-4.74658
6	TRUE	Empty	1	1	0.99	-	0.84	Squamolone	INCHIKEY:XYVMBSCIEDOIJQ-UHFFFAOYSA-N	C 5H 8N 2O 2	128.1	8.92	0.00449963	9.00643	8.56263
7	TRUE	Empty	0.999	1	1	1	0.96	Norleucine	INCHIKEY:LRQKBLKVPFOOQJ-YFKPBYRVSA-N	C 6H 13NO 2	131.1	7.26	0.0148064	9.17814	8.9695
8	TRUE	Empty	0.996	0.99	1	1	0.79	Epicatechin	INCHIKEY:PFTAWBLQPZVEMU-UKRRQHHQSA-N	C 15H 14O 6	290.1	6.5	0.00263986	M.V.	9.06283
9	TRUE	Empty	0.994	0.99	0.99	0.99	0.97	Arginine	INCHIKEY:ODKSFYDXXFIFQN-BYPYZUCNSA-N	C 6H 14N 4O 2	174.1	17.29	0.0014961	10.4367	10.0873
10	TRUE	Empty	0.993	1	0.98	1	0.95	Glutamic acid	INCHIKEY:WHUUTDBJXJRKMK-UHFFFAOYSA-N	C 5H 9NO 4	147.1	8.57	0.375269	9.6622	9.66726
11	TRUE	Empty	0.99	1	1	0.98	0.91	D-Tryptophan	INCHIKEY:QIVBCDIJIAJPQS-SECBINFHSA-N	C 11H 12N 2O 2	204.1	7.67	0.00188668	9.46807	8.98095
12	TRUE	Empty	0.988	1	0.99	0.98	0.92	Tryptophan	INCHIKEY:QIVBCDIJIAJPQS-UHFFFAOYSA-N	C 11H 12N 2O 2	204.1	5.21	0.0171158	9.27182	9.00429
13	TRUE	Empty	0.986	1	1	0.97	0.74	L-Targinine	INCHIKEY:NTNWOCRCBQPEKQ-YFKPBYRVSA-N	C 7H 16N 4O 2	188.1	16.33	0.0157334	9.16195	8.32839
14	TRUE	Empty	0.981	1	0.96	0.99	0.95	Valine	INCHIKEY:KZSNJWFQEVHDMF-BYPYZUCNSA-N	C 5H 11NO 2	117.1	7.17	0.028562	8.67044	8.2482
15	TRUE	Empty	0.978	0.98	0.99	0.97	0.12	URIDINE 5'-DIPHOSPHOGALACTOSE	INCHIKEY:HSCJRCZFDFQWRP-UHFFFAOYSA-N	C 15H 24N 2O 17P 2	566.1	9.1	0.00302392	7.99229	8.27178
16	TRUE	Empty	0.973	0.99	0.93	1	0.5	PC(18:2(9Z,12Z)/18:2(9Z,12Z))	INCHIKEY:FVXDQWZBHIXIEJ-LNDKUQBDSA-N	C 44H 80NO 8P	781.6	18.78	0.00226584	8.84858	M.V.
17	TRUE	Empty	0.972	0.99	1	0.95	0.37	8,11,14-Eicosatriynoic acid	INCHIKEY:QLLIWTBTVOPGCM-UHFFFAOYSA-N	C 20H 28O 2	300.2	9.19	0.0224431	7.36498	7.43137
18	TRUE	Empty	0.958	1	1	0.92	0.05	9-HPODE	INCHIKEY:JGUNZIWGNMQSBM-KPWHUNMNSA-N	C 18H 32O 4	312.2	8.02	0.0840591	6.9012	7.61554
19	TRUE	Empty	0.956	1	0.99	0.92	0.76	NCGC00180666-02!(2R,3S,4S,5R,6S)-2-[(3,4,5-trihydroxyoxan-2-yl)oxymethyl]-6-(3,4,5-trimethoxyphenoxy)oxane-3,4,5-triol	INCHIKEY:GGIDHIBVLYVTAU-QGPLIYBISA-N	C 20H 30O 13	478.2	5.56	0.0122419	8.62992	-7.61672
20	TRUE	Empty	0.952	0.98	0.97	0.93	0.53	Salicin	INCHIKEY:NGFMICBWJRZIBI-SYLRKERUSA-N	C 13H 18O 7	286.1	6.33	0.0235004	7.9628	5.86261
21	TRUE	Empty	0.95	1	1	-	0.11	6-Hydroxyluteolin 6,4'-dimethyl ether 7-rutinoside	INCHIKEY:DEDMNYYOJUBPSV-LWNHNQRMSA-N	C 29H 34O 16	638.2	7.25	0.0399789	5.63817	M.V.
22	TRUE	Empty	0.949	1	1	0.9	0.84	Dimethyl-L-arginine	INCHIKEY:YDGMGEXADBMOMJ-LURJTMIESA-N	C 8H 18N 4O 2	202.1	15.15	0.0399243	8.60369	6.96827
23	TRUE	Empty	0.949	1	1	-	0.46	Hovenidulcioside B1	INCHIKEY:CMTXBVHDOWHMEA-UHFFFAOYNA-N	C 44H 70O 16	854.5	12.42	0.00815325	7.92854	8.57478
24	TRUE	Empty	0.948	1	1	-	0.86	cis-1,2-dimethylcyclohexane	INCHIKEY:KVZJLSYJROEPSQ-OCAPTIKFSA-N	C 8H 16	112.1	7.7	0.00332076	8.32354	8.14004
25	TRUE	Empty	0.948	1	1	-	0.88	Glucopyranosylmoranoline	INCHIKEY:GNVIYGFSOIHFHK-NIKVEEOSSA-N	C 12H 23NO 9	325.1	8.56	0.0411109	8.76718	9.15391
26	TRUE	Empty	0.948	1	1	-	0.34	PI(18:0/16:2(9Z,12Z))	INCHIKEY:YWDSWFNICPHDCI-NYQWBNQISA-N	C 43H 79O 13P	834.5	14.12	0.00095031	8.10058	7.68079
27	TRUE	Empty	0.948	1	1	-	0.01	Rubratoxin A	INCHIKEY:XOEFANNJIKAWGX-UHFFFAOYSA-N	C 26H 32O 11	520.2	8.03	0.034851	7.86725	7.52883
28	TRUE	Empty	0.947	1	1	-	0.7	hexadecyl hexanoate	INCHIKEY:SDPBXXCJVDQPIQ-UHFFFAOYSA-N	C 22H 44O 2	340.3	14.47	0.0485213	7.21703	6.77729
29	TRUE	Empty	0.946	0.99	1	-	0.33	8E-Tetradecenyl acetate	INCHIKEY:VZGHIFSDFDWSOD-BQYQJAHWSA-N	C 16H 30O 2	254.2	9.97	0.0348474	7.59885	7.50262
30	TRUE	Empty	0.946	1	1	-	0.1	SQDG 34:3	INCHIKEY:LNRVRCHULFFBFY-IBGNPXJHSA-N	C 43H 76O 12S	816.5	13.97	0.00077158	6.62469	-4.84693
31	TRUE	Empty	0.945	0.99	1	-	0.42	9-hexadecenal	INCHIKEY:QFPVVMKZTVQDTL-BQYQJAHWSA-N	C 16H 30O	238.2	16.29	0.0387488	7.83851	7.90401
32	TRUE	Empty	0.945	0.99	0.99	-	0.82	Dimetan	INCHIKEY:ITEQSCBLCCNACE-UHFFFAOYSA-N	C 11H 17NO 3	211.1	8.37	0.00370662	8.35486	8.19182
33	TRUE	Empty	0.945	1	0.99	-	0.97	L-xylono-1,4-lactone	INCHIKEY:CUOKHACJLGPRHD-NUNKFHFFSA-N	C 5H 8O 5	148	8.72	0.00829068	8.13753	7.84632
34	TRUE	Empty	0.944	1	1	0.89	0.77	NCGC00180160-02!2-(3,4-dimethoxyphenoxy)-6-[(3,4,5-trihydroxyoxan-2-yl)oxymethyl]oxane-3,4,5-triol	INCHIKEY:BUKNGVJDVSRYIT-UHFFFAOYSA-N	C 19H 28O 12	448.2	5.95	0.00427979	9.56249	9.19314
35	TRUE	Empty	0.944	0.96	0.95	0.93	0.06	URIDINE-5-MONOPHOSPHATE	INCHIKEY:DJJCXFVJDGTHFX-UHFFFAOYSA-N	C 9H 13N 2O 9P	324	8.91	0.000855973	7.19331	-5.69911
36	TRUE	Empty	0.943	0.99	1	-	0.35	(1x,2x)-Guaiacylglycerol 2-glucoside	INCHIKEY:UKYKCLFPJXHNON-UHFFFAOYNA-N	C 16H 24O 10	376.1	7.46	0.0254486	6.7576	M.V.
37	TRUE	Empty	0.943	1	0.99	-	0.64	Isosyringinoside	INCHIKEY:RYVGCUJETSKZDU-ARJAWSKDNA-N	C 23H 34O 14	534.2	6.91	0.000119114	7.86583	-5.62962
38	TRUE	Empty	0.942	0.98	1	-	0.86	(9xi,10xi,12xi)-9,10-Dihydroxy-12-octadecenoic acid	INCHIKEY:XEBKSQSGNGRGDW-JXMROGBWNA-N	C 18H 34O 4	314.2	2.32	0.00277373	8.02018	6.97236
39	TRUE	Empty	0.942	0.98	1	-	0.88	3-(2-Methylpropyl)pyridine	INCHIKEY:DEGXTCKEZCCZOP-UHFFFAOYSA-N	C 9H 13N	135.1	11.08	0.0250391	8.18251	8.21742
40	TRUE	Empty	0.942	0.99	0.99	-	0.47	4-Hydroxy-5-(3',5'-dihydroxyphenyl)-valeric acid-O-methyl-O-glucuronide	INCHIKEY:NLJOFAILECLFIF-UHFFFAOYSA-N	C 18H 26O 12	434.1	7.02	0.000187803	7.49772	5.79973
41	TRUE	Empty	0.942	1	0.99	-	0.6	N-gamma-L-Glutamyl-D-alanine	INCHIKEY:WQXXXVRAFAKQJM-UHFFFAOYSA-N	C 8H 14N 2O 5	218.1	9.15	0.0110248	7.50821	7.91287
42	TRUE	Empty	0.942	1	0.99	-	0.18	Phenylethyl primeveroside	INCHIKEY:ZRGXCWYRIBRSQA-UHFFFAOYNA-N	C 19H 28O 10	416.2	5.83	0.0362241	7.63051	6.21113
43	TRUE	Empty	0.941	0.99		-	0.01	Chlorogenoquinone	INCHIKEY:ITENTBHADJNDDH-RQOWECAXNA-N	C 16H 16O 9	352.1	7.87	0.0304534	7.5293	M.V.
44	TRUE	Empty	0.941	0.99	0.99	-	0.77	Etaspirene	INCHIKEY:NHJSLVJXXDHDRV-UHFFFAOYNA-N	C 14H 22O	206.2	15.12	0.037851	7.59331	7.40018
45	TRUE	Empty	0.941	0.98	1	-	0.68	N-Benzoylaspartic acid	INCHIKEY:DJLTZJGULPLVOA-UHFFFAOYSA-N	C 11H 11NO 5	237.1	5.98	0.00123653	7.86287	8.16523
46	TRUE	Empty	0.94	1	0.99	-	0.92	Leukoaminochrome	INCHIKEY:VGSVNUGKHOVSPK-UHFFFAOYSA-N	C 8H 9NO 2	151.1	6.52	0.0268285	8.2162	7.84211
47	TRUE	Empty	0.94	0.99	0.99	-	0.92	S-(2-carboxypropyl)-Cysteamine	INCHIKEY:UFRVABODKAYFCB-UHFFFAOYSA-N	C 6H 13NO 2S	163.1	12.73	0.000206689	9.59659	9.04216
48	TRUE	Empty	0.939	0.99	0.99	-	0.29	2,3-Diketo-L-gulonate	INCHIKEY:GJQWCDSAOUMKSE-SCQFTWEKSA-N	C 6H 8O 7	192	8.48	0.0144501	M.V.	6.3917
49	TRUE	Empty	0.939	1	0.99	-	0.51	b-D-Xylopyranosyl-(1->4)-a-L-rhamnopyranosyl-(1->2)-L-arabinose	INCHIKEY:YRPDOTZSNIEQMF-UHFFFAOYNA-N	C 16H 28O 13	428.2	9.15	0.00512556	7.9607	7.44986
50	TRUE	Empty	0.939	0.99	0.99	-	0.98	beta-cyano-L-alanine	INCHIKEY:OIVLITBTBDPEFK-UHFFFAOYSA-N	C 4H 6N 2O 2	114	8.95	0.00671749	9.20864	9.12411
51	TRUE	Empty	0.939	0.99	0.99	-	0.29	Diketogulonic acid	INCHIKEY:GJQWCDSAOUMKSE-STHAYSLISA-N	C 6H 8O 7	192	8.48	4.60207e-05	M.V.	6.6303
52	TRUE	Empty	0.939	0.98	1	-	0.41	epi-4'-hydroxyjasmonic acid	INCHIKEY:KLPBEXRQJBKPDM-VFERKYTESA-N	C 12H 18O 4	226.1	18.81	0.000425908	8.77285	M.V.
53	TRUE	Empty	0.939	0.99	0.99	-	0.92	L-2-Amino-3-(1-pyrazolyl)propanoic acid	INCHIKEY:PIGOPELHGLPKLL-UHFFFAOYNA-N	C 6H 9N 3O 2	155.1	11.75	0.0013648	9.85764	9.53021
54	TRUE	Empty	0.939	0.99	0.99	-	0.98	L-3-Cyanoalanine	INCHIKEY:BXRLWGXPSRYJDZ-YEQUQEJONA-N	C 4H 6N 2O 2	114	8.95	0.00671749	9.20864	9.12411
55	TRUE	Empty	0.938	0.98	0.99	-	0.13	Hoduloside VIII	INCHIKEY:RDSYZBZVCGNHLV-MDWZMJQENA-N	C 46H 76O 18	916.5	6.14	0.0363688	7.6023	6.75339
56	TRUE	Empty	0.937	0.99	0.99	-	0.06	Glucaric acid	INCHIKEY:DSLZVSRJTYRBFB-LLEIAEIESA-N	C 6H 10O 8	210	8.49	9.36371e-06	M.V.	6.47619
57	TRUE	Empty	0.937	0.99	0.99	-	0.06	Mucic acid	INCHIKEY:DSLZVSRJTYRBFB-DUHBMQHGSA-N	C 6H 10O 8	210	8.49	9.36371e-06	M.V.	6.47619
58	TRUE	Empty	0.937	1	0.98	-	0.58	Viscumiside A	INCHIKEY:KZQCCKUDYVSOLC-UHFFFAOYSA-N	C 22H 24O 11	464.1	8.43	0.00394493	7.4664	7.86697
59	TRUE	Empty	0.935	1	0.98	-	0.54	Benzyl O-[arabinofuranosyl-(1->6)-glucoside]	INCHIKEY:VLAZYPZGDJXPDY-UHFFFAOYNA-N	C 18H 26O 10	402.2	5.82	0.0281706	8.69813	7.13071
60	TRUE	Empty	0.934	0.97	0.99	-	0.04	4-Methylbenzoic acid	INCHIKEY:LPNBBFKOUUSUDB-UHFFFAOYSA-N	C 8H 8O 2	136.1	6.84	0.0278597	6.87831	7.30255
61	TRUE	Empty	0.934	0.98	0.99	-	0.84	5.alpha.-Pregnane-3.alpha.,21-diol-11,20-dione	INCHIKEY:XWYBFXIUISNTQG-VKMGZQQJSA-N	C 21H 32O 4	348.2	16.7	0.0494788	7.77449	M.V.
62	TRUE	Empty	0.934	0.99	0.98	-	0.43	D-erythro-L-galacto-Nonulose	INCHIKEY:USEZWDIVUDJKCA-UHFFFAOYNA-N	C 9H 18O 9	270.1	9.74	0.000917911	8.35401	8.02209
63	TRUE	Empty	0.933	0.98	0.98	-	0.48	10-Hydroxyloganin	INCHIKEY:GTEDLLYKAJRTNK-UMHDANERSA-N	C 17H 26O 11	406.1	7.21	0.0102805	7.23721	-5.66567
64	TRUE	Empty	0.933	1	0.98	-	0.26	Patulin	INCHIKEY:ZRWPUFFVAOMMNM-UHFFFAOYNA-N	C 7H 6O 4	154	6.31	0.042125	7.19866	6.62948
65	TRUE	Empty	0.933	0.99	0.98	-	0.59	Todatriol glucoside	INCHIKEY:OFPQILBGSKDVRR-UHFFFAOYNA-N	C 17H 26O 10	390.2	6.37	0.00895025	7.65379	6.42516
66	TRUE	Empty	0.932	0.99	0.98	-	0.75	Cerulenin	INCHIKEY:GVEZIHKRYBHEFX-ZIMISOLQSA-N	C 12H 17NO 3	223.1	8.3	0.00359493	8.22668	7.76433
67	TRUE	Empty	0.932	0.96	0.99	-	0.35	Melongoside H	INCHIKEY:DAIAMOGGSOXZSO-UHFFFAOYNA-N	C 45H 72O 17	884.5	6.16	0.0438239	7.26918	M.V.
68	TRUE	Empty	0.932	1	0.97	0.89	0.29	NCGC00385785-01!(2R,3R,4S,5S,6R)-2-[[2-(3,4-dihydroxyphenyl)-5,7-dihydroxy-3,4-dihydro-2H-chromen-3-yl]oxy]-6-(hydroxymethyl)oxane-3,4,5-triol	INCHIKEY:YOVYWMDLYSJYPO-ANWIJZKESA-N	C 21H 24O 11	452.1	5.41	0.0490097	M.V.	7.57937
69	TRUE	Empty	0.932	0.99	0.98	-	0.52	Norecasantalic acid	INCHIKEY:LDSSHHGVKDZTIX-UHFFFAOYNA-N	C 11H 16O 2	180.1	6.02	0.00291769	7.85795	-6.74684
70	TRUE	Empty	0.931	1	0.97	-	0.59	(S)-malyl alpha-D-glucosaminide	INCHIKEY:DFSUVSNIIHLGAX-NKQVSKEESA-N	C 10H 17NO 9	295.1	8.74	0.690485	8.50094	8.79528
71	TRUE	Empty	0.931	1	0.97	-	0.58	Methylmalonate	INCHIKEY:ZIYVHBGGAOATLY-UHFFFAOYSA-N	C 4H 6O 4	118	8.58	0.00939726	7.9874	7.00449
72	TRUE	Empty	0.929	1	0.97	-	0.9	Subaphylline	INCHIKEY:SFUVCMKSYKHYLD-ALCCZGGFSA-N	C 14H 20N 2O 3	264.1	8.69	0.0242426	8.68529	8.01251
73	TRUE	Empty	0.927	0.98	0.98	-	0.53	Heptadecanedioic acid	INCHIKEY:QCNWZROVPSVEJA-UHFFFAOYSA-N	C 17H 32O 4	300.2	12.68	0.047144	6.96448	7.30502
74	TRUE	Empty	0.926	0.98	0.98	-	0.51	3-Hydroxy-4-methoxymandelate	INCHIKEY:PXMUSCHKJYFZFD-MRVPVSSYSA-N	C 9H 10O 5	198.1	10.19	0.029451	8.56445	8.32202
75	TRUE	Empty	0.924	0.99	0.96	-	0.09	Hovenidulcioside B2	INCHIKEY:ZWAMUWXPVAELPG-UHFFFAOYNA-N	C 38H 60O 12	708.4	13.02	0.0158703	M.V.	7.09538
76	TRUE	Empty	0.924	1	0.9	0.91	0.95	Myristic acid	INCHIKEY:TUNFSRHWOTWDNC-UHFFFAOYSA-N	C 14H 28O 2	228.2	15.06	5.9472e-08	8.69616	8.41878
77	TRUE	Empty	0.924	0.99	0.97	-	0.6	Oleoside dimethyl ester	INCHIKEY:KYVUMEGNMQDSHO-YWEYNIOJNA-N	C 18H 26O 11	418.1	7.38	0.00610414	7.93322	6.99454
78	TRUE	Empty	0.921	1	0.96	-	0.22	1-Hydroxyvitamin D3 3-D-glucopyranoside	INCHIKEY:HVQXEPIFQWOABC-IORSAUDJSA-N	C 33H 52O 8	576.4	13.65	2.21448e-05	-4.70521	7.49443
79	TRUE	Empty	0.919	0.99	0.96	-	0.07	formyl 2Z,4E,6Z-decatrienoate	INCHIKEY:DLNQRJFVXCCDKL-BGDVVUGTSA-N	C 11H 16O 2	180.1	6.42	0.00784121	M.V.	7.62027
80	TRUE	Empty	0.917	0.98	0.96	-	0.73	4-Coumaroylputrescine	INCHIKEY:CJHDBEPXEKGBDW-YVMONPNESA-N	C 13H 18N 2O 2	234.1	8.49	0.0340402	8.28122	M.V.
81	TRUE	Empty	0.916	0.97		-	0.12	Glycerol tripropanoate	INCHIKEY:YZWRNSARCRTXDS-UHFFFAOYSA-N	C 12H 20O 6	260.1	3.9	0.00818881	M.V.	8.80504
82	TRUE	Empty	0.914	0.96		-	0.69	Selenium sulfide	INCHIKEY:ZQRRBZZVXPVWRB-UHFFFAOYSA-N	SSe	111.9	7.8	0.0173554	M.V.	8.8635
83	TRUE	Empty	0.913	0.94	0.97	-	0.76	Methyl isopentyl disulfide	INCHIKEY:XTTOMWDBKHINLK-UHFFFAOYSA-N	C 6H 14S 2	150.1	19.63	0.00640052	9.2704	M.V.
84	TRUE	Empty	0.912	0.99	0.95	-	0.11	4-Heptenal diethyl acetal	INCHIKEY:OQOCQBJWOCRPQY-UHFFFAOYNA-N	C 9H 14O 5	202.1	6.53	0.893784	8.90522	9.18893
85	TRUE	Empty	0.911	0.98	0.95	-	0.52	(E)-2-Methyl-2-buten-1-ol O-beta-D-Glucopyranoside	INCHIKEY:RQSHFEQQQBCYNX-ZZXKWVIFNA-N	C 11H 20O 6	248.1	7.03	0.0274727	7.50014	7.58277
86	TRUE	Empty	0.911	0.82	0.97	0.9	0.73	2'-Hydroxy-2,4,5,5'-tetramethoxychalcone	INCHIKEY:UJYJMZRALNAPMM-FNORWQNLSA-N	C 19H 20O 6	344.1	8	0.00170442	8.53879	M.V.
87	TRUE	Empty	0.911	0.96	0.96	-	0.26	cyclohex-1-ene-1-carbonyl-CoA	INCHIKEY:YTTZSBMCHSFQSJ-TYHXJLICSA-N	C 28H 44N 7O 17P 3S	875.2	9.03	0.0426326	7.56927	M.V.
88	TRUE	Empty	0.906	1	0.94	-	0.6	(+/-)-N,N-Dimethyl menthyl succinamide	INCHIKEY:ZPVCSXMAYSEYLT-UHFFFAOYNA-N	C 12H 24	168.2	16.16	0.000763654	8.60463	6.55285
89	TRUE	Empty	0.906	0.96	0.96	-	0.02	NCGC00380956-01!(E)-9-hydroxy-6-[3,4,5-trihydroxy-6-(hydroxymethyl)oxan-2-yl]oxydec-4-enoic acid	INCHIKEY:LOXLRESYSNWIMK-DUXPYHPUSA-N	C 16H 28O 9	364.2	19.35	0.0122394	7.93287	-7.0571
90	TRUE	Empty	0.898	0.88	0.98	-	0.49	4'-Methyl-(-)-epigallocatechin 3-(4-methyl-gallate)	INCHIKEY:HFWSXNDMKGHKRD-VSVVGSIZNA-N	C 24H 22O 11	486.1	5.8	0.03553	8.84617	9.13778
91	TRUE	Empty	0.897	0.85	0.99	-	0.07	N-(1-Deoxy-1-fructosyl)methionine	INCHIKEY:KEGDHFMPWJTRFP-JQEBHMFINA-N	C 11H 21NO 7S	311.1	7.85	0.00912715	6.96278	M.V.
92	TRUE	Empty	0.895	0.99	0.92	-	0.24	Linalool 3,7-oxide beta-primeveroside	INCHIKEY:UXVKRHYINVOVAM-UHFFFAOYNA-N	C 21H 36O 11	464.2	5.66	8.0981e-06	7.30818	M.V.
93	TRUE	Empty	0.894	0.98	0.92	-	0.76	Pyrogallol-2-O-glucuronide	INCHIKEY:SOHXEAWMMVSJFL-COGRHJPHSA-N	C 12H 14O 9	302.1	8.93	0.0433482	8.91776	8.29031
94	TRUE	Empty	0.893	0.84	1	-	0.61	3-[(2E)-2-(Nitromethylidene)hydrazinyl]benzoic acid	INCHIKEY:RASCTTJMDLLADA-WEVVVXLNSA-N	C 8H 7N 3O 4	209	5.2	0.0271519	7.96287	7.68804
95	TRUE	Empty	0.892	0.87	0.98	-	0.25	Epicatechin 3-O-(4-methylgallate)	INCHIKEY:BXDRTHBTGNNTEW-VSVVGSIZNA-N	C 23H 20O 10	456.1	7.38	0.0376454	7.53396	6.59803
96	TRUE	Empty	0.889	0.86	0.98	-	0.72	Aminofurantoin	INCHIKEY:KLJOOBXQOIHZQM-XCVCLJGOSA-N	C 8H 8N 4O 3	208.1	8.21	0.0269305	8.83128	-8.05355
97	TRUE	Empty	0.889	0.89	0.97	-	0.53	Formononetin 7-(6''-malonylglucoside)	INCHIKEY:RDTAGQKYPGLCBK-UHFFFAOYNA-N	C 25H 24O 12	516.1	5.39	0.0207757	8.16616	8.66897
98	TRUE	Empty	0.888	0.97	0.92	-	0.33	(5S,6R)-2'-Deoxyuridine glycol	INCHIKEY:ORRZKGUUIZYKRN-CAZBWKGRSA-N	C 9H 14N 2O 7	262.1	8.75	0.00523311	6.0618	7.95704
99	TRUE	Empty	0.883	0.98	0.91	-	0.39	Pimelylcarnitine	INCHIKEY:AUWRHMAICBSXMC-NSHDSACASA-N	C 14H 25NO 6	303.2	5.45	0.0238117	7.68063	5.79675
100	TRUE	Empty	0.881	0.99	0.99	0.77	0.29	CITRATE	INCHIKEY:KRKNYBCHXYNGOX-UHFFFAOYSA-N	C 6H 8O 7	192	8.48	4.60207e-05	M.V.	6.6303
101	TRUE	Empty	0.875	1	0.89	-	0.39	Serinyl-Valine	INCHIKEY:ILVGMCVCQBJPSH-UHFFFAOYSA-N	C 8H 16N 2O 4	204.1	8.63	1.04677e-06	10.2479	7.65613
102	TRUE	Empty	0.872	0.93	0.92	-	0.8	1,2-O-Isopropylidene-.alpha.-D-glucofuranose	INCHIKEY:BGGCXQKYCBBHAH-OZRXBMAMSA-N	C 9H 16O 6	220.1	5.84	0.0344746	7.4684	7.30291
103	TRUE	Empty	0.871	0.78	0.99	-	0.33	4,2'-Dihydroxy-3-methoxy-5'-methylchalcone	INCHIKEY:WNMAPNHXZFEFDI-QPJJXVBHSA-N	C 17H 16O 4	284.1	3.24	0.0453547	M.V.	7.86938
104	TRUE	Empty	0.869	0.85	0.35	-	0.72	(-)-Bornesitol	INCHIKEY:DSCFFEYYQKSRSV-FQGZZYRYSA-N	C 7H 14O 6	194.1	5.16	0.453345	6.58657	7.8853
105	TRUE	Empty	0.869	0.85	0.35	-	0.72	L-Pinitol	INCHIKEY:DSCFFEYYQKSRSV-FQGZZYRYSA-N	C 7H 14O 6	194.1	5.16	0.453345	6.58657	7.8853
106	TRUE	Empty	0.869	0.87	0.95	-	0.16	Rifapentine	INCHIKEY:WDZCUPBHRAEYDL-GZAUEHORSA-N	C 47H 64N 4O 12	876.5	12.42	0.00357064	6.32481	7.49428
107	TRUE	Empty	0.866	0.86	0.94	-	0.39	7-Hydroxy-6-methyl-8-ribityl lumazine	INCHIKEY:COXMGTTXHPRZBO-BBVRLYRLSA-N	C 12H 16N 4O 7	328.1	8.55	0.036484	8.9638	8.41568
108	TRUE	Empty	0.866	0.91	0.92	-	0.8	Dehydropachyrrhizone	INCHIKEY:MSXPSNDSSMJJME-UHFFFAOYSA-N	C 20H 12O 7	364.1	8.29	0.610314	7.81822	7.76339
109	TRUE	Empty	0.864	0.83	0.96	-	0.81	1-(2-Thienyl)-1-heptanone	INCHIKEY:BDNFJEMAAFFMFH-UHFFFAOYSA-N	C 11H 16OS	196.1	17.25	0.0283494	8.74291	8.18265
110	TRUE	Empty	0.863	0.82	0.96	-	0.67	3'-Hydroxy-5,7,4'-trimethoxy-8-C-methylflavanone	INCHIKEY:PWZSUNQCPBOCBW-UHFFFAOYSA-N	C 19H 20O 6	344.1	3.01	0.000938582	-7.58254	9.31027
111	TRUE	Empty	0.862	0.84	0.95	-	0.7	Citrusin C	INCHIKEY:VADSVXSGIFBZLI-UHFFFAOYNA-N	C 16H 22O 7	326.1	8.67	0.0225084	8.05731	6.56528
112	TRUE	Empty	0.862	0.97	0.88	-	0.01	Haploside B	INCHIKEY:VXAGYKCLEBBUTC-OGPMXKHPSA-N	C 22H 22O 13	494.1	8.55	0.0131752	7.55537	6.60294
113	TRUE	Empty	0.861	0.89	0.92	-	0.86	5-Amino-1-(5-phospho-D-ribosyl)imidazole	INCHIKEY:PDACUKOKVHBVHJ-ZRTZXPPTSA-N	C 8H 14N 3O 7P	295.1	8.91	0.0066936	8.99739	8.23738
114	TRUE	Empty	0.86	0.99	0.87	-	0.62	Vanilloloside	INCHIKEY:SIMPNXWTAVEOTO-UHFFFAOYNA-N	C 14H 20O 8	316.1	5.97	0.00467772	6.16723	M.V.
115	TRUE	Empty	0.859	0.77	0.98	-	0.05	PA 42:6	INCHIKEY:WEFDGHNQPJARRT-RZRJMXCZNA-N	C 45H 77O 8P	776.5	16.79	0.00563896	7.60977	-6.5305
116	TRUE	Empty	0.858	1	0.86	-	0.23	2,2,4-Trimethyl-1,3-pentadienol diisobutyrate	INCHIKEY:OMVSWZDEEGIJJI-UHFFFAOYNA-N	C 16H 30O 4	286.2	5.75	0.0296561	6.69862	M.V.
117	TRUE	Empty	0.856	0.78	0.94	0.83	0.66	5-Hydroxy-7-methoxyflavanone	INCHIKEY:ORJDDOBAOGKRJV-AWEZNQCLSA-N	C 16H 14O 4	270.1	3.76	0.000703936	8.15887	9.55012
118	TRUE	Empty	0.853	0.94	0.88	-	0.49	1,9-Nonanedithiol	INCHIKEY:GJRCLMJHPWCJEI-UHFFFAOYSA-N	C 9H 20S 2	192.1	14.35	1.17391e-05	8.874	M.V.
119	TRUE	Empty	0.851	0.84	0.93	-	0.52	Lumazine	INCHIKEY:UYEUUXMDVNYCAM-UHFFFAOYSA-N	C 6H 4N 4O 2	164	2.72	0.0200669	6.22788	M.V.
120	TRUE	Empty	0.849	0.91	0.89	-	0.3	Cyanofenphos	INCHIKEY:LRNJHZNPJSPMGK-UHFFFAOYSA-N	C 15H 14NO 2PS	303	8.81	0.00379628	7.97966	-6.43953
121	TRUE	Empty	0.847	0.94	0.87	-	0.48	Dioxydemeton-S-methyl	INCHIKEY:PZIRJMYRYORVIT-UHFFFAOYSA-N	C 6H 15O 5PS 2	262	9.83	0.00926286	7.33407	-5.99012
122	TRUE	Empty	0.847	0.81	0.94	-	0.49	Methylene thiocyanate	INCHIKEY:JWZXKXIUSSIAMR-UHFFFAOYSA-N	C 3H 2N 2S 2	130	7.08	0.0371819	M.V.	8.79254
123	TRUE	Empty	0.845	0.72	0.98	-	0.41	Licorice glycoside D1	INCHIKEY:KDXWZGOCBQGWEB-KGVSQERTNA-N	C 35H 36O 15	696.2	9.83	0.0181707	6.518	7.90971
124	TRUE	Empty	0.845	0.69	0.97	0.81	0.6	Lorazepam	INCHIKEY:DIWRORZWFLOCLC-UHFFFAOYNA-N	C 15H 10Cl 2N 2O 2	320	8.3	0.00419296	M.V.	8.15918
125	TRUE	Empty	0.843	0.76	0.96	-	0.01	Cefditoren	INCHIKEY:KMIPKYQIOVAHOP-YLGJWRNMSA-N	C 19H 18N 6O 5S 3	506.1	9.19	0.0234887	6.79036	M.V.
126	TRUE	Empty	0.84	0.93	0.87	-	0.48	Pelargonidin 3-glucoside-5-(6''-acetylglucoside)	INCHIKEY:WHGIHNHKFKWHED-MEDDCGNXSA-O	C 29H 33O 16	637.2	8.94	0.018032	8.15861	6.66826
127	TRUE	Empty	0.838	1	0.83	-	0.61	3,5,7-Trihydroxyflavone 3-glucoside-8-sulfate	INCHIKEY:IFHBLQSSJDMWJS-DLBNBXSVSA-N	C 21H 20O 13S	512.1	6.36	0.0237176	7.71719	6.25565
128	TRUE	Empty	0.837	1	0.81	0.8	0.79	Argininosuccinic acid	INCHIKEY:KDZOASGQNOPSCU-WDSKDSINSA-N	C 10H 18N 4O 6	290.1	9.28	0.000214977	7.6177	8.11623
129	TRUE	Empty	0.836	0.83	0.91	-	0.01	S-(2,3,4-Trihydroxybutyl)mercapturic acid	INCHIKEY:QGRUOXFPDCTBCA-KKMMWDRVSA-N	C 9H 17NO 6S	267.1	2.39	0.00739563	M.V.	8.19626
130	TRUE	Empty	0.834	0.88	0.89	-	0.59	Dinoseb acetate	INCHIKEY:RDJTWDKSYLLHRW-UHFFFAOYNA-N	C 12H 14N 2O 6	282.1	2.95	0.00604867	M.V.	8.85573
131	TRUE	Empty	0.834	0.68	0.99	-	0.3	Orcein	INCHIKEY:VPEASJIRGSVXBF-UHFFFAOYSA-N	C 28H 24N 2O 7	500.2	5.31	0.0218448	8.41014	M.V.
132	TRUE	Empty	0.834	0.86	0.9	-	0.04	PyroGlu-Ser-Arg	INCHIKEY:WRHLUOQLHYDXFI-UHFFFAOYSA-N	C 14H 24N 6O 6	372.2	8.59	0.00556089	6.60931	-5.55346
133	TRUE	Empty	0.831	0.89	0.88	-	0.02	3-[(2-Mercapto-1-methylpropyl)thio]-2-butanol	INCHIKEY:PHLKBLKTWMSFGF-UHFFFAOYNA-N	C 8H 18OS 2	194.1	6.72	0.0394802	6.66141	-5.25358
134	TRUE	Empty	0.831	0.89	0.87	-	0.72	N-Salicyloylaspartic acid	INCHIKEY:JMJWCANHASMNST-UHFFFAOYSA-N	C 11H 11NO 6	253.1	7.93	0.0357718	8.35547	M.V.
135	TRUE	Empty	0.826	0.66	0.98	-	0.97	4-Methoxybenzyl O-(2-sulfoglucoside)	INCHIKEY:LILHPDXFNPJEJC-UHFFFAOYNA-N	C 14H 20O 10S	380.1	9.25	0.0161441	9.93669	9.44102
136	TRUE	Empty	0.823	0.78	0.92	-	0.57	5-Methylthioribose 1-phosphate	INCHIKEY:JTFITTQBRJDSTL-KVTDHHQDSA-N	C 6H 13O 7PS	260	10.23	0.00732801	M.V.	8.67633
137	TRUE	Empty	0.823	0.77	0.93	-	0.18	Epinastine	INCHIKEY:WHWZLSFABNNENI-UHFFFAOYSA-N	C 16H 15N 3	249.1	15.23	0.0111243	7.78294	M.V.
138	TRUE	Empty	0.82	1	0.81	-	0.32	2-Methyl-1,4-benzoquinone	INCHIKEY:VTWDKFNVVLAELH-UHFFFAOYSA-N	C 7H 6O 2	122	4.2	0.0360536	8.44875	8.58554
139	TRUE	Empty	0.815	0.77	0.91	-	0.07	7-Methoxy-2-methylisoflavone	INCHIKEY:XRGWZIGGCNSFRY-UHFFFAOYSA-N	C 17H 14O 3	266.1	2.18	0.00362232	M.V.	7.50169
140	TRUE	Empty	0.815	0.72	0.94	-	0.16	Euchrenone b3	INCHIKEY:AOFNFHUUIWLAAW-UHFFFAOYSA-N	C 27H 26O 7	462.2	6.04	0.00290323	7.43935	M.V.
141	TRUE	Empty	0.809	1	0.79	-	0.11	Vicine	INCHIKEY:KGNGTSCIQCLKEH-UHFFFAOYNA-N	C 10H 16N 4O 7	304.1	8.56	0.0390107	7.51671	7.97824
142	TRUE	Empty	0.808	1	0.79	-	0.23	S-Cysteinosuccinic acid	INCHIKEY:XPKKFTKCRVIDAG-UHFFFAOYNA-N	C 7H 11NO 6S	237	9.24	0.0430643	7.99999	7.74024
143	TRUE	Empty	0.808	0.82	0.88	-	0.01	Tuberosin	INCHIKEY:ZBTYHECJEINCMD-UHFFFAOYSA-N	C 20H 18O 5	338.1	2.13	0.012707	M.V.	7.32173
144	TRUE	Empty	0.807	0.81	0.88	-	0.25	Amritoside	INCHIKEY:FHIYBTOOLROABN-UHFFFAOYNA-N	C 26H 26O 18	626.1	10.01	0.000700918	7.91253	6.25846
145	TRUE	Empty	0.807	0.58	1	-	0.72	S-[1-[2-(Acetyloxy)ethyl]butyl] ethanethioate	INCHIKEY:GSJSVAFGVJLTNQ-UHFFFAOYNA-N	C 10H 18O 3S	218.1	17.17	0.000663331	8.50439	7.64391
146	TRUE	Empty	0.806	0.88	0.84	-	0.65	Allithiamine	INCHIKEY:WNCAVNGLACHSRZ-SDNWHVSQSA-N	C 15H 22N 4O 2S 2	354.1	8.38	0.0216419	-5.47844	8.16764
147	TRUE	Empty	0.806	0.78	0.89	-	0.63	Neosakuranetin	INCHIKEY:JGPQAWUEYNNXOH-QPJJXVBHSA-N	C 16H 14O 5	286.1	2.46	0.00482102	8.21082	9.33423
148	TRUE	Empty	0.804	0.57	1	-	0.32	Emamectin B1a	INCHIKEY:CXEGAUYXQAKHKJ-NSBHKLITSA-N	C 49H 75NO 13	885.5	12.39	0.012833	7.48916	8.0811
149	TRUE	Empty	0.804	0.87	0.84	-	0.56	Sulfoxone	INCHIKEY:NEDPPCHNEOMTJV-UHFFFAOYSA-N	C 14H 16N 2O 6S 3	404	8.53	4.58412e-05	7.86383	-5.50622
150	TRUE	Empty	0.803	0.83	0.86	-	0.5	Serinyl-Cysteine	INCHIKEY:FFOKMZOAVHEWET-UHFFFAOYSA-N	C 6H 12N 2O 4S	208.1	2.28	0.00142653	M.V.	8.03891
151	TRUE	Empty	0.8	0.8	0.88	-	0.29	Epitheaflavic acid 3'-gallate	INCHIKEY:RQTWDINIJYBFNS-UHFFFAOYNA-N	C 28H 20O 14	580.1	9.96	0.0190322	7.40221	M.V.
152	TRUE	Empty	0.8	0.79	0.88	-	0.43	Methyldalbergin	INCHIKEY:BUZZVHCRHOIKOC-UHFFFAOYSA-N	C 17H 14O 4	282.1	2.23	0.00252619	M.V.	8.30752
153	TRUE	Empty	0.798	0.7	0.92	-	0.01	Betavulgaroside I	INCHIKEY:UOGGJUUNBPSGHY-UHFFFAOYNA-N	C 47H 70O 20	954.4	6.13	0.0356643	6.68947	7.44994
154	TRUE	Empty	0.798	0.82	0.86	-	0.05	Glyceollidin I	INCHIKEY:NLHMQOCIFRDSNU-UHFFFAOYSA-N	C 20H 20O 5	340.1	2.51	0.0269411	M.V.	8.35818
155	TRUE	Empty	0.794	0.8	0.87	-	0	Epicatechin 3-O-(3-O-methylgallate)	INCHIKEY:XGTBMCGGGJLOPS-MGRUGCKGNA-N	C 23H 20O 10	456.1	2.77	0.0247531	7.70749	5.86531
156	TRUE	Empty	0.794	0.84	0.84	-	0.03	Kanzonol N	INCHIKEY:ANRYVYXUTFJPOR-UHFFFAOYNA-N	C 22H 24O 6	384.2	2.57	0.0169331	5.69917	8.51932
157	TRUE	Empty	0.789	0.58	0.97	-	0.7	Tamarixetin 3-O-sulfate	INCHIKEY:AMDQJKQFLBYDAD-UHFFFAOYSA-N	C 16H 12O 10S	396	7.86	0.0437217	7.30231	M.V.
158	TRUE	Empty	0.788	0.65	0.93	-	0.67	3-(1,1-Dimethyl-2-propenyl)-8-(3-methyl-2-butenyl)xanthyletin	INCHIKEY:PIOKBHKPGZHPHS-UHFFFAOYSA-N	C 24H 28O 3	364.2	7.25	0.0409441	7.70443	7.77668
159	TRUE	Empty	0.784	0.63	0.94	-	0.78	Methyl (5Z)-3-amino-5-(nitromethylidene)dithiole-4-carboxylate	INCHIKEY:IAWCIGLAQKOOTG-IHWYPQMZSA-N	C 6H 6N 2O 4S 2	234	9.33	0.0466527	8.16422	5.95188
160	TRUE	Empty	0.783	0.86	0.82	-	0.7	Tetrodotoxin	INCHIKEY:CFMYXEVWODSLAX-HUILCFQTSA-N	C 11H 17N 3O 8	319.1	8.91	0.0316642	8.26385	8.16068
161	TRUE	Empty	0.782	0.76	0.87	-	0.09	Dexketoprofen	INCHIKEY:DKYWVDODHFEZIM-NSHDSACASA-N	C 16H 14O 3	254.1	2.17	0.0118318	M.V.	7.4836
162	TRUE	Empty	0.78	0.9	0.8	-	0.63	2,3-Dihydroxy-1-(4-hydroxy-3-methoxyphenyl)-1-propanone	INCHIKEY:UTXNRISXYKZJTH-UHFFFAOYNA-N	C 10H 12O 5	212.1	17.31	0.00285191	8.4722	7.67227
163	TRUE	Empty	0.775	0.58	0.95	-	0.77	Orciprenaline-3-O-sulfate	INCHIKEY:IJWHPUWEGCYHMQ-UHFFFAOYNA-N	C 11H 17NO 6S	291.1	7.74	0.00516528	8.0146	-6.81679
164	TRUE	Empty	0.768	0.59	0.93	-	0.55	1,2,4,5,7-Pentathiocane	INCHIKEY:QFHGOPGLIADNQA-UHFFFAOYSA-N	C 3H 6S 5	201.9	2.14	0.0328601	8.18392	8.35934
165	TRUE	Empty	0.766	0.97	0.74	-	0.67	3-Phenylpropyl glucosinolate	INCHIKEY:AAVHHGNQWFTUKS-SFQUDFHCNA-N	C 16H 23NO 9S 2	437.1	9.63	0.00125912	7.41425	-5.18949
166	TRUE	Empty	0.765	0.86	0.79	-	0.02	7-Hydroxy-6,8-di-C-methylflavanone 7-O-arabinoside	INCHIKEY:RLPHVYYMPXVDER-WGPZSCIYSA-N	C 22H 24O 7	400.2	2.13	0.0191259	6.31702	7.75911
167	TRUE	Empty	0.761	0.52	0.95	-	0.27	Paromomycin	INCHIKEY:UOZODPSAJZTQNH-LSWIJEOBSA-N	C 23H 45N 5O 14	615.3	8.58	0.0494995	M.V.	6.67937
168	TRUE	Empty	0.757	0.81	0.81	-	0.27	1-(3-Methylbutanoyl)-6-apiosylglucose	INCHIKEY:ZIEQNJFDWXPCBV-UHFFFAOYNA-N	C 16H 28O 11	396.2	8.93	0.0373749	7.53053	8.02502
169	TRUE	Empty	0.755	0.99	0.91	0.57	0.29	glycerol 2-phosphate	INCHIKEY:DHCLVCXQIBBOPH-UHFFFAOYSA-N	C 3H 9O 6P	172	8.75	0.000146857	7.62944	-5.67528
170	TRUE	Empty	0.751	0.83	0.79	-	0.74	Disperse Yellow 1	INCHIKEY:BCPQALWAROJVLE-UHFFFAOYSA-N	C 12H 9N 3O 5	275.1	9.27	0.00294372	7.47862	-6.08286
171	TRUE	Empty	0.747	0.8		-	0.06	Chromium(III) acetate	INCHIKEY:WYYQVWLEPYFFLP-UHFFFAOYSA-K	C 6H 9CrO 6	229	7.95	0.0194484	7.921	7.3712
172	TRUE	Empty	0.745	0.99	0.99	0.3	0.29	Isocitric acid	INCHIKEY:ODBLHEXUDAPZAU-UHFFFAOYSA-N	C 6H 8O 7	192	8.48	4.60207e-05	M.V.	6.6303
173	TRUE	Empty	0.742	0.76	0.81	-	0.24	Gallagic acid	INCHIKEY:FMQVGTFRDKFGPD-UHFFFAOYNA-N	C 28H 12O 16	604	14.1	0.000289101	7.81935	M.V.
174	TRUE	Empty	0.736	0.54	0.91	-	0.02	PI(17:2(9Z,12Z)/0:0)	INCHIKEY:CXHDGZFLVMVIOQ-NTXBIVQQSA-N	C 26H 47O 12P	582.3	8.96	0.0121525	M.V.	7.53006
175	TRUE	Empty	0.735	0.73	0.81	-	0.55	Pulchellidin 3-glucoside	INCHIKEY:AXHJFMYMJAQWDM-BMSZIAFZSA-O	C 22H 23O 12	479.1	9.01	0.0272703	7.93416	7.23796
176	TRUE	Empty	0.734	0.87	0.74	-	0.27	Salvianolic acid L	INCHIKEY:CLZDRNKNWXDFQT-UHFFFAOYNA-N	C 36H 30O 16	718.2	14.68	0.0240064	7.49789	7.33075
177	TRUE	Empty	0.733	0.54	0.9	-	0.05	Acetophenazine	INCHIKEY:WNTYBHLDCKXEOT-UHFFFAOYSA-N	C 23H 29N 3O 2S	411.2	4.62	0.00347216	-5.52027	8.71228
178	TRUE	Empty	0.733	0.98	0.36	0.9	0.01	Citrulline	INCHIKEY:RHGKLRLOHDJJDR-BYPYZUCNSA-N	C 6H 13N 3O 3	175.1	17.02	0.00299175	8.19703	-5.22528
179	TRUE	Empty	0.729	0.82	0.76	-	0.28	Cysteinyl-Serine	INCHIKEY:YXQDRIRSAHTJKM-UHFFFAOYSA-N	C 6H 12N 2O 4S	208.1	3.01	0.0349352	7.38192	8.70384
180	TRUE	Empty	0.728	0.98	0.4	0.86	0.86	6-Hydroxytropinone	INCHIKEY:UOHSTKWPZWFYTF-LSBSRIOGSA-N	C 8H 13NO 2	155.1	2.18	0.00028005	8.51255	6.60806
181	TRUE	Empty	0.724	0.65	0.84	-	0.14	MLS000697730-01!	INCHIKEY:IYRMWMYZSQPJKC-UHFFFAOYSA-N	C 15H 10O 6	286	8.67	0.00810808	7.44649	6.82467
182	TRUE	Empty	0.722	0.6	0.86	-	0.53	Gossyvertin	INCHIKEY:WDKQNEBNLKMOLB-UHFFFAOYSA-N	C 16H 18O 4	274.1	7.38	0.0354173	7.34914	M.V.
183	TRUE	Empty	0.718	0.89	0.71	-	0.23	C.I. Food Black 2	INCHIKEY:DUUHLAZWLLCPSP-DUJDKOHPSA-N	C 26H 19N 5O 13S 4	737	8.32	0.00030848	M.V.	8.08194
184	TRUE	Empty	0.709	0.57	0.85	-	0.74	Dihydronaringenin-O-sulphate	INCHIKEY:IKBKWHISHDVLNO-UHFFFAOYSA-N	C 15H 14O 8S	354	8.88	0.00246894	8.08253	-6.77063
185	TRUE	Empty	0.709	0.71	0.78	-	0.4	Viscutin 1	INCHIKEY:TXPZFODNQVHXLF-RLFCAORJSA-N	C 27H 26O 11	526.1	8.94	0.0276229	7.41004	M.V.
186	TRUE	Empty	0.707	0.97	0.65	-	0.14	Allixin	INCHIKEY:OHRPDNHRQKOLGN-UHFFFAOYSA-N	C 12H 18O 4	226.1	18.96	0.000775268	M.V.	8.76977
187	TRUE	Empty	0.706	0.62	0.82	-	0.45	6,9,12,15,18,21-Tetracosahexaynoic acid	INCHIKEY:NLJRNNBATXZRLC-UHFFFAOYSA-N	C 24H 24O 2	344.2	3.38	0.0129252	8.72102	M.V.
188	TRUE	Empty	0.703	0.69	0.79	-	0.56	Onogenin 7-O-glucoside	INCHIKEY:MUMZCCFWSDSRJP-UHFFFAOYSA-N	C 23H 24O 11	476.1	9.05	0.0086708	8.85136	7.8703
189	TRUE	Empty	0.701	0.86	0.7	-	0.33	Didymocalyxin B	INCHIKEY:SYJASFPLLHXQRX-VZZMMMTHSA-N	C 28H 22O 7	470.1	5.88	0.00997632	8.87979	7.54881
190	TRUE	Empty	0.701	0.6	0.82	-	0.03	N'-((8-Hydroxy-2-quinolinyl)methylene)-3-phenylpropanohydrazide	INCHIKEY:IBBFFYQBJRPFRH-DEDYPNTBSA-N	C 19H 17N 3O 2	319.1	8.49	0.0205577	7.61475	8.0815
