# Supplementary material
Source: publisher figshare collection journal article supplement (https://tandf.figshare.com/articles/dataset/_/9798299)
Supplement: Supplementary file 3 [file 1 › Table S12 - Copy.xlsx]

## Sheet: Table S12.
Table S12. Differentially accumulated gamma-glutamyl-congugates with significant quantities (p, q ≤ 0.05) in Control leaf (CL), Control root (CR), Salinity treated leaf (NL), Salinity treated root (NR), Salinity treatment with silicon leaf (NSiL), Salinity treatment with silicon root (NSiR), Silicon treated leaf (SiL) and Silicon treated roots (SiR). Values are shown as the log10 of the precursor…
#	Visible	Star	ID Score	Mass Accuracy Score	Isotopic Distribution Score	MS2 Score	XIC Score	Analyte Name	Accession Number	Molecular Formula	Molecular Weight	Retention Time (min)	ANOVA (Log10 Precursor Intensity) Comparison Level: Sample Biological Replicate Level: MS Sample	CL	CR	NL	NR	NSiL	NSiR	SiL	SiR
1	TRUE	Empty	0.789	0.87	0.67	N.A.	0.66	1-(gamma-Glutamylamino)cyclopropanecarboxylic acid	INCHIKEY:FQRKFJSYMKRNGO-UHFFFAOYSA-N	C 9H 14N 2O 5	230.1	19.94	5.55111e-16	M.V.	8.53987	M.V.	8.64777	M.V.	8.63499	M.V.	8.52773
2	TRUE	Empty	0.932	0.97	0.99	N.A.	0.35	gamma-Glutaminyl-4-hydroxybenzene	INCHIKEY:SKLQABVRGGRTIT-UHFFFAOYNA-N	C 11H 14N 2O 4	238.1	7.84	0.000124887	-6.2048	7.8832	5.84408	6.53358	7.56706	6.5732	7.85841	8.24083
3	TRUE	Empty	0.812	0.97	0.81	N.A.	0.51	Gamma-Glutamyl Glutamine	INCHIKEY:JBFYFLXEJFQWMU-WDSKDSINSA-N	C 10H 17N 3O 6	275.1	8.69	0.00680733	6.52182	M.V.	7.50749	7.19971	7.48846	9.19343	-6.76491	7.06955
4	TRUE	Empty	0.713	0.6	0.82	N.A.	0.73	Gamma-glutamyl-Alanine	HMDB:HMDB29142	C 8H 15N 3O 4	217.1	8.49	6.50099e-05	M.V.	M.V.	M.V.	8.28401	M.V.	M.V.	M.V.	M.V.
5	TRUE	Empty	0.935	0.99	0.98	N.A.	0.75	Gamma-glutamyl-Aspartate	HMDB:HMDB29145	C 9H 15N 3O 6	261.1	8.96	0.00862185	7.87642	8.17815	10.3357	9.27882	9.4415	9.82912	7.69021	9.86167
6	TRUE	Empty	0.945	1	0.99	N.A.	0.71	gamma-Glutamyl-beta-aminopropiononitrile	INCHIKEY:VQPVVWAFTIFKDD-MDOHGIEYNA-N	C 8H 13N 3O 3	199.1	8.97	2.45693e-05	7.65792	M.V.	8.05455	M.V.	7.84921	M.V.	7.64146	M.V.
7	TRUE	Empty	0.924	0.98	0.97	N.A.	0.73	gamma-Glutamyl-beta-cyanoalanine	INCHIKEY:QUAADUAOVLZBJM-IOMOGOHMNA-N	C 9H 13N 3O 5	243.1	7.47	3.90308e-10	8.5542	6.93318	8.41688	M.V.	8.75404	M.V.	8.67084	M.V.
8	TRUE	Empty	0.906	0.97	0.95	N.A.	0.61	Gamma-glutamyl-Leucine	HMDB:HMDB29153	C 11H 21N 3O 4	259.2	6.46	0.00372794	7.39568	M.V.	6.80884	M.V.	7.94703	M.V.	7.50446	M.V.
9	TRUE	Empty	0.783	0.53	0.84	N.A.	0.35	gamma-Glutamyl-S-(1-propenyl)cysteine sulfoxide	INCHIKEY:LMNDKWXDMBGGAL-GORDUTHDSA-N	C 11H 18N 2O 6S	306.1	7.26	0.000165585	6.81723	M.V.	M.V.	M.V.	M.V.	M.V.	7.46379	M.V.
10	TRUE	Empty	0.726	0.65	0.67	N.A.	0.98	Gamma-glutamyl-Threonine	HMDB:HMDB29159	C 9H 17N 3O 5	247.1	10.85	4.15485e-07	M.V.	8.71587	-6.82838	9.19698	-6.28275	8.73229	6.60214	8.8983
11	TRUE	Empty	0.834	0.88	0.88	N.A.	0.26	Gamma-Glutamyltyrosine	INCHIKEY:VVLXCWVSSLFQDS-QWRGUYRKSA-N	C 14H 18N 2O 6	310.1	5.87	0.000564359	M.V.	6.46785	M.V.	6.3491	M.V.	8.64359	M.V.	8.32241
12	TRUE	Empty	0.943	1	0.99	N.A.	0.41	L-gamma-glutamyl-L-valine	INCHIKEY:AQAKHZVPOOGUCK-UHFFFAOYSA-N	C 10H 18N 2O 5	246.1	8.06	5.10703e-15	8.1157	-5.37939	8.19601	M.V.	8.32605	M.V.	8.27705	M.V.
13	TRUE	Empty	0.925	0.99	0.97	N.A.	0.65	L-gamma-glutamyl-L-leucine	INCHIKEY:MYFMARDICOWMQP-UHFFFAOYSA-N	C 11H 20N 2O 5	260.1	7.82	1.09455e-06	8.2345	M.V.	8.46203	M.V.	8.44748	M.V.	8.73261	M.V.
